# Supplementary material
Source: publisher figshare collection journal article supplement (https://brill.figshare.com/ndownloader/files/38836533)
Supplement: Supplementary file 1 [file 38836533]

Index gÉographique : les pays d’origine des immatriculés et gradués de la nation germanique de l’ancienne Université d’Orléans, 1602-1781

Voir aussi les *Indices* qui ont été édités et publiés dans la série *Les Livres des procurateurs de la nation germanique, 1444-1602*, Leiden 1971-2015, et dans *Les registres-matricules de la nation germanique, 1602-1781*, Leiden 2023, pp. 745-909 : Index des noms de personnes.

-------------------------------------------------------------------------------

Les pays :

-1-Allemagne : Allemagne du Nord (Frise orientale, Brême, Hambourg, Brunswick-Lunebourg, Schleswig-Holstein, Mecklembourg), Brandebourg, Saxe, Thuringe

Allemagne du Nord-1-*

Frise orientale-1-+

La marche de Brandebourg-1-=

Saxe-1-#

Thuringe-1-$

-2-Allemagne : Westphalie et Cologne

Westphalie-2-*

Juliers, Clèves, Berg-2-#

Cologne-2-=

-3-Allemagne : Palatinat du Rhin, Hesse, le margraviat de Bade, Wurtemberg, Franconie, Souabe, Bavière

Palatinat-Hesse-Sarre-3-*

Bade-Wurtemberg-3-$

Franconie-Bavière-3-#

Souabe-3-&

-4-Autriche, Italie, Hongrie, Tchéquie, Slovénie

Autriche-4-*

Bohême-Moldavie-4-#

Hongrie-4-=

Carniole-Trentin-4-+

-5-Belgique, Luxembourg, France

Flandre-Brabant-5-*

Liège-5-=

Hainaut-Namur-Luxembourg-5-#

Artois-Flandre gallicane-5-+

-6-Danemark, Norvège, Suède

Danemark-6-*

Norvège-6-+

Suède-Finlande-6-=

-7-France : Alsace, Lorraine, Franche-Comté

Lorraine-7-*

Alsace-7-*

Franche-Comté-7-=

-8-Grande-Bretagne, Irlande

Ecosse-8-*

Angleterre-8-+

Irlande-8-=

-9-Pays-Bas : Frise, Groningue

Frise occidentale, Leeuwarden-9-*

Groningue-Ommelanden-9-=

-10-Pays-Bas : Drenthe, Overijssel, Gueldre, Utrecht

Drenthe-Overijssel-10-*

Gueldre-10+

Utrecht-10-=

-11-Pays-Bas : Hollande

Hollande-Septentrionale-Westfrise-11-&

Amsterdam-11-+

Amsterdam-Compagnie néerlandaise des Indes orientales (VOC)-11-++

La Haye-11-=

Hollande-Méridionale-11-$

-12-Pays-Bas : Zélande, Brabant, Limbourg-Maastricht

Zélande-12-*

Flandre zélandaise-12-#

Brabant des États-12-+

Limbourg-Maastricht-12-=

-13-Pologne, Russie, Estonie, Lettonie, Lithuanie

Pologne et les pays Baltes-13*

Poméranie-13-+

Prusse-13-=

Silésie-Lusace-13-#

-14-Suisse, France, Italie

Suisse-14-*

Savoie-14-=

Italie-14-#

-1-Allemagne : Allemagne du Nord (Frise orientale, Brême, Hambourg, Brunswick-Lunebourg, Schleswig-Holstein, Mecklembourg), Brandebourg, Saxe, Thuringe

Allemagne du Nord-1-*

Frise orientale-1-+

La marche de Brandebourg-1-=

Saxe-1-#

Thuringe-1-$

1602-1610

Joachimus Götz [Brunsvigius]-1-*

Juliuss Jagemann Brunsvigius-1-*

Joannes Ernestus Jagemann Brunswigius-1-*

Julius Götz Brunsvigius-1-*

Joannes Peparinus Bremensis-1-*

Harman van Eithen Hamburgensis-1-*

Diettleff von Staffeltt auss dem hertzogthumb Mecklenburgk-1-*

Conradus Gumpertus comes Bentheimensis-1-#

Maximilian von Nebra-1-#

Wolderus Schele Hamburgensis-1-*

Martinus Harnisch Naumburgensis-1-#

Christian von Bellin Marchicus-1-=

Ernst von Kötteritz Marchiacus-1-=

Hieronymus Hellwig Schusanus Marchicus-1-=

Daniel Neuthamer Landispergi-Neomarchicus-1-=

Jeremias Funccius Ordruffiensis Thuringus-1-$

Julius Reichardsz Brunswigius Saxo-1-*

Georg Schrader Brunswigius Saxo-1-*

Christianus Ohemius Mulhusinus Thuringius-1-$

Henricus Baleman Lubecensis Saxo-1-*

Petrus Martens Lubecensis-1-*

Georgius Buring Brunsvicensis-1-*

Ivo Reventlouw Holsatus-1-*

Fridericus Sagerus Misnensis-1-#

Christophorus Drachstedt Islebiensis Saxo-1-#

Johannes Schnellius Haderslebensis e ducatu Schleswicensi-1-*

Joachimus de Böttin Marchiacus Br[andenburgensis]-1-=

Georg von Ilefeltt zuhe Ilefeltt Megapolitanus-1-*

Henninge Stamer Saxo-1-#

Joachimus Carolus dux Brunsvicensis et Lunæburgensis etc.-1-*

Adolarius Cuetz Saxo Halensis-1-#

Fridericus Cost Saxo Halensis-1-#

Jost Christoff Hack, aulicus ducis Brunswicensis-1-*

Johan Jacob Wormsser der Mittler, aulicus ducis Brunswicensis-1-*

Wielhelm von Retzdorff, aulicus ducis Brunswicensis-1-*

Christoff von Watzdorff, aulicus ducis Brunswicensis-1-*

Ernest Dubolaff von Enkstad, aulicus ducis Brunswicensis-1-*

Elias Hacke, aulicus ducis Brunswicensis-1-*

Sigismundus von Landtsperg, aulicus ducis Brunswicensis-1-*

Henricus Krausz Halensis-1-#

Jacobus Bunting Hannoveranus Brunswigius-1-*

Frantz Witzendorff Hier[onymi] filius Lunæburgicus-1-*

Jeremias Uden Saxo Halensis-1-#

Johan David Wogavv Halensis Saxo-1-#

Hannsz Schlüter genandt Tiez auszm furstentheil Luneburg-1-*

Samuel von Winterfeltt Marchicus-1-=

Richardus Dieterus Marchicus-1-=

Leopoldus a Rossingk-1-*

Joachimus a Rossingk-1-*

Henricus Duderstadius-1-#

Johannes Adamus Patricius [?]-1-*

Henningus de Reden Brunswicensis-1-*

Ericus a Rheden Brunswicensis-1-*

Gerhardus Becker Hoyerus Saxo-1-#

Henning von Steinbergh-1-*

Johan Hilman von Steinbergk Braunswigius-1-*

Fridericus Brandis Hildesheimensis Saxo-1-#

Christoph Reiboldt Voitlandus-1-#

Ericus Herbst Saxo-1-#

Julius de Schaurotz in Kaschwitz Misnensis-1-#

Joachim Edler von Plotho-1-#

Christoff Durfeld Saxo Magdeburgensis-1-#

Melchisedech Creps von Aleveldt-1-*

Julius Lapper Saxo-1-#

Petrus a Born Neomarchicus de Graessch-1-=

Johannes Hesigam Islebiensis-1-#

Laurentius Hofmanus Halla-Saxo-1-#

Joannes Hermannus Cloppenborgh Frisius Nordanus-1-+

Friederich von Nisswitz aus Saxen-1-#

Ulricus Winckelius Hamburgensis-1-*

Heinricus a Lutzelburgk Dresdensis-1-#

Sigfridus Powisch Holsatus-1-*

Hermannus Tegeder Meppensis-1-#

Matthæus Chytræus Rostochiensis-1-*

Andreas Molinæus Bremensis-1-*

Daniel Molinæus Bremensis-1-*

Augustus Löser Misnensis-1-#

Friderich Metzsch zu Reichenbach und Friesen nobilis Variscus-1-#

Nicolaus Eggebrecht Vismariensis Megapolitanus-1-*

Johannes Sylvester ex ducatu Sleswicensi Flensburgensis-1-*

Jacobus Puchnerus Neomarchiacus-1-=

Sigismundus a Lattorff nobilis Saxo-1-#

Laurentius Kæstelius Schoenfeldius prope Bojemos-1-#

Otto Guilhelmus liber baro a Schönburgk-1-#

Heinrich Rantzow Holsatus-1-*

Joannes Christophorus ab Harstall Eisfeldiacus-1-$

Joannes Henricus Wallrab a Brugh-1-$

Ernestus Magirus Braunwicensis natione-1-*

Martinus Mendius Budstadensis Thuringus-1-$

Simon Neusze Holsatus-1-*

Georg von Wertheren-1-#

Augustus von Hoym Saxo-1-#

Christian Julius von Hoym Saxo-1-#

Jacob von Etzdorff Thuringius-1-$

Adolf Blum Holsatus-1-*

Hanns Georg Vitzthumb von Eckstedt-1-#

Georg Heinrich von Draschwitz-1-#

Josephus Avenarius Misnicus-1-#

Joachimus Rumshagen Neobrandenburgensis Megapolitanus-1-*

Petrus Gayrus Kistricensis Misnicus-1-#

Augustus von Starschedel Misnicus-1-#

Elias Indelius Erphordensis-1-$

Joannes Blanszdorff Dresdensis Mysus-1-#

Michael Vagenman (Jagenman) [?]-1-*

Christianus Möstelius Dresdensis Misniacus-1-#

Joannes Ernestus a Schlieben in Papitz, etc.-1-=

Adamus Fridericus a Schlieben Marchiacus-1-=

Jacob Schencke in Flehtingen Marchicus-1-=

Joachim Götz Marchicus-1-=

Ludolphus Schmit Lunæburgensis-1-*

Wilhelmus Grummer Hamburgensis-1-*

Adam von Werbelow Marchicus-1-=

Hans vom Tagen (Jagen) Marchicus-1-=

Georg de Waldow Marchicus-1-=

Johannes Domannus, Hansae Teutonicae civitatum syndicus-1-*

Henricus Brockes, reipublicae Lubecensis senator, legatus Hansae Teutonicae-1-*

Hieronymus Voegler, senator reipublicae Hamburgensis, legatus Hansae Teutonicae-1-*

Johannes Rodenborch Hamburgensis-1-*

Lucas Beeckeman Hamburgensis-1-*

Daniel de Greve Hamburgensis-1-*

Eberhardt Twestrengh Hamburgensis-1-*

Gothardus Godersen Hamburgensis-1-*

Georgius Hauboldus ab Einsiedell Chambensis-1-#

Paulus Friderici Plauensis Variscus-1-#

Wolfgangus a Wesera Erffurdiensis-1-$

Henricus Zerneman Bremensis Saxo-1-*

Wilhelmus a Bothmar Saxo-1-#

Rudolphus a Bunaw Saxo-1-#

Amandus Œigenius Hamburgensis-1-*

Joannes Theodoricus baro a Greussen in Waldt-1-#

Rudolphus baro a Greussen in Waldt, 3 octobris 1607-1-#

Christophorus Benickendorffius Berolinensis Marchicus-1-=

Remmerus Beninga nobilis et capitaneus in Grimersum et Dohrnumb orientalis Frisius-1-+

Hero a Werdum capitaneus in Werdum, Inhusen et Rofhusen orientalis Frisius Harlenanus-1-+

Johannes Schültz Hallensis Saxo-1-#

Guilhelmus Khellner a Zinnendorff-1-#

Johannes Albertus a Quitzow-1-=

Justus Weilern Berolinensis Marchiacus-1-=

Andreas de Keller (Dikelln) von Halle auss Sachsen-1-#

Benno Pflug Misnicus-1-#

Wolffgangus a Bockwoldt Holsatus-1-*

Christophorus Stymmelius Francofurtanus Marchicus, medicinae doctor-1-=

Christianus ab Osterhausen Misnicus-1-#

Carolus a Friesen Misnicus-1-#

Johannes Bornitius Torgensis Misnicus-1-#

Heinricus a Bismarck Marchicus Brandenburgicus-1-=

Christophorus a Bismarck Marchicus-1-=

Justus a Bismarck Marchicus-1-=

Johannes a Dietern Megapolitanus-1-*

Fridericus Iveni Guntherus Helmstadensis-1-#

Justus Hake Hoyensis-1-#

Nicolaus ab Helffand [?]-1-*

Joannes Olearius-1-#

Ernestus Ludovicus Ewerts Henricopolitanus Saxo Bruns[vigus]-1-*

Levinus de Schulenburg Bernardi p[iae] m[emoriae] filius-1-#

Christoferus von der Luhe Megapolitanus-1-*

Joachimus de Botmar Luneburgicus Saxo-1-*

Henricus Ernestus comes Stolbergensis-1-$

Theodorus Lemeger Hamburgensis-1-*

Heinrich von Bunaw zu Treben-1-$

Hinrich von Buchwaldt-1-*

Hanns von Bockwaldt Holsatus-1-*

Johannes Baghe (Bass) Hamburgensis Saxo-1-*

Joachimus a Campo Hamburgensis Saxo-1-*

Paridamus a Campo Hamburgensis Saxo-1-*

Hieremias Husanus Isnacensis Turingus-1-$

Joannes Georgius a Born Marchicus-1-=

Elias Truchses Misnicus-1-#

Henricus Hilmarus a Munchausen Brunsvicensis-1-*

Liborius a Munchausen Brunsvicensis-1-*

Hanns Smit (Schmit) aus dehr Nuhe Marck-1-=

Christianus Kysenweter in Dittersbach Misnicus-1-#

Georgius Cyriacus Francofurtanus ad Oderam Marchicus-1-=

Antonius Guntherus comes in Oldenburg et Delmenhorst-1-*

Georg Abel Ficker Werdensis Misnicus-1-#

Johannes Nicolaus ab Ilow Marchiacus-1-=

Johannes de Staeffhorst-1-*

Johannes Simonides Embdanus Frisius-1-+

Friderich von Robingk Saxo-1-#

Ottho vonn Mandelschlo Bremensis-1-*

Levim Moltzahn Meckelnburger-1-*

Jochem Moltzahn Meklenburger-1-*

Detloff von Bockwoldt Holsatus-1-*

Georg von Karlevitz Magdeburgus Saxo-1-#

Georg Albrecht herr zu Putlitz-1-=

Johann von Wilmerstorff Marchicus-1-=

Hanss Wolff von der Heiden Saxo-1-#

Liborius von Bredo Marchicus-1-=

Antonius Brockhausen Lubbecensis-1-*

Nicolaus von Linen (Tinen) Holsatus-1-*

Henningus von Tinen Holsatus-1-*

Bernhardus Swalve Embda-Frisius-1-+

Bartholomæus Gosman Halensis Saxo-1-#

Rudolphus a Bunau Misnicus-1-#

Guntherus a Bunau Misnicus-1-#

Theodorus Bussius Kalenbergus Saxo-Brunsvigius-1-*

Kaspar Bussius Kalenbergus Saxo-Brunsvigius-1-*

Georgius Bussius Kalembergus Saxo-Brunsvigius-1-*

Jacobus Unruh Halensis Saxo-1-#

Joachimus Twestrengt Hamburgensis Saxo-1-*

Jacobus Siverus Eibestadiensis Holsatus-1-*

Ivarus Siverus Eiderstadiensis Holsatus-1-*

Laurentius Hoyer Holsatus-1-*

Johannes Hoyer Holsatus-1-*

-1-Allemagne : Allemagne du Nord (Frise orientale, Brême, Hambourg, Brunswick-Lunebourg, Schleswig-Holstein, Mecklembourg), Brandebourg, Saxe, Thuringe

Allemagne du Nord-1-*

Frise orientale-1-+

La marche de Brandebourg-1-=

Saxe-1-#

Thuringe-1-$

1611-1620

Henrich Levetzow nobilis Megapolitanus-1-*

Hans Barner Megapolitanus-1-*

Hanns Löser Misnicus-1-#

Christoff Rudolff aussem Winckell-1-#

Hans Heinrich von Hoburgk-1-#

Jacob Grote Luneburgicus Saxo-1-*

Johan Wahleben [?]-1-*

David a Winterfeldt Marchiacus-1-=

Christian Weiller vonn Berllin aus der Marck-1-=

Abrahamus Seeberghius Embdanus-1-+

Johannes Ludovicus Vogt [?]-1-*

Jacob Gerstenberkg Bustadiensis Thuringus-1-$

Justus Zinzerlingus, D. Thuringus-1-$

Gaspar von Buchwaldt n[obilis] Holsatus-1-*

Arnoldus Preun Islebiensis-1-#

Jodocus Christianus ab Hagen Thuringus-1-$

Johannnes Casimirus a Schaumberg-1-$

Curtt von Schlieben-1-#

Ernst aus dem Winckell-1-#

Henricus Eppen Frisius orientalis-1-+

David Anet Pegaviensis Lipsicus-1-#

Abraham Martini Vinariensis Thuringus-1-$

Joannes Stuckius Hannoveranus Saxo-1-*

Nicolaus Frese Frisius orientalis-1-+

Christophorus Luconius Rostochiensis Megapolitanus Saxo-1-*

Johannes Corvinus Isennacensis Thuringus-1-$

Cyriacus Herdesianus Anhaltinus, jurium doctor-1-#

Hans von Uffele von Hamborch-1-*

Johannes Leporinus Kindelbrunensis Thuringus, ph. et medicinae doctor-1-$

Paulus Berenss Hamburgensis-1-*

Caspar Ludolff L Hamburg-1-*

Petrus ab Uffelln Hamburg-1-*

Caspar Naevius Chemnicensis Misnicus-1-#

Johan Bese Stadensis-1-*

Christophorus Borcholt Hamburgensis-1-*

Mauritius de Marwitz-1-=

Henricus Volckmar Lipsiensis-1-#

Georg von Winterfeldt-1-=

Joachimus Kraz Werbensis Marchiobrandeburgensis-1-=

Theodoricus Brandt Erphurdo-Thuringus-1-$

Adamus Eberhardus a Wahrn Misnicus-1-#

Henricus medius Ruthenus, dominus a Plauen-1-#

Johan Caspar baro a Schönburgh-1-#

Joannes Richter Ossitiensis Misnicus-1-#

Johannes Corvinus Güstroviensis Megapolitanus-1-*

Matthæus Roseler Rostochiensis Megapolitanus-1-*

Wilhelmus Hutterus Grimmensis Misnius-1-$

Erasmus a Bennigsen nobilis Saxo ex ducatu Brunswicensi-1-*

Ericus de Lenthe Saxo ex ducatu Brunswicensi-1-*

Henricus Kivit Helmstadiensis Brunsvigicus-1-*

Sebastian Jhering Nordanus Frisius orientalis-1-+

Joannes Fridericus archiepiscopus Bremensis, hæres Norwegiae, dux Sch[l]esvici-Holsatiae-1-*

Volckmarus a Dieffholt Frisius orientalis-1-+

Gebhardt von Alvenschleve Hundesburgk-1-#

Johan von Hövelen Lubecensis-1-*

Joannes Diane Albimontanus (huic natio jus immatriculationis remisit) [?]-1-#

Johannes Georgius marchio Brandenburgensis, Prussiae, Stetini et Pomeraniae-1-=

Johan Georg von Saltfeldt ex Thuringia-1-$

Daniel Straube Hallensis Saxo-1-#

Christophorus Straube Hallensis Saxo-1-#

Michael Wichman Hamburgensis-1-*

George Pflug der Jünger (aulae magister Johannis Georgii marchionis Brandenburgensis)-1-#

Hieronymus Wiedeman Goslar-Saxo-1-#

Heinricus ab Einsiedell eques Misnicus-1-#

Wolf Otto a Brandenstein eques Thuringus-1-$

Constantinus Drachstedt Halens-Saxo-1-#

Mauritius Ludtwiger Halens-Saxo-1-#

Cajus Rantzow Holsatus-1-*

Jonas Mostelius Lipsia-Misnicus-1-#

Georgius Hoffman Naumburgensis Misnicus-1-#

Georgius a Monachausen Braunsvicensis-1-*

Johan Heinrich von dem Weider (Werder) Brunsvicensis-1-*

Georg Albrecht von Haugwitz-1-#

Christoffer von Düringh ex agro Bremensi-1-*

Johann von Düringh ex agro Bremensi auff Horneburgh-1-*

Friedrich Wiegand von Lengenfeldt auss dem lande Tühringe geb[or]en-1-$

Johannes Phluggius Neoangermunda-Marchicus-1-=

Constantinus l’Empereur ab Oppyck Bremensis-1-*

Johannes l’Empereur ab Oppyck Bremensis-1-*

Hermannus Westhoff Lubecensis Saxo-1-*

Dieterich Jobst Aurochs von und zu Opffershausen-1-$

Johannes a Disekau Misnicus-1-#

Otto von Diesekaw eques Misnicus-1-#

Georgius Schütz Weissenfelsensis Misnicus-1-#

Abraham Wackerbart Megapolitanus-1-*

Jurgen Karckdorff Melgeltius (Megapolitanus) F.-1-*

Henricus von Anten Hamburgensis-1-*

Adam von Bernstedt Diringen (Thuringen)-1-$

Johannes Cnobbe Frisius orientalis Esensis, J.U.D.-1-+

Jonathan Hagemeister Gustroviensis Megapolitanus-1-*

Albertus Bolenius Frisius orientalis-1-+

Hugoltus junior de Starschedell-1-#

Exul Rumph Stepnicio-Marchicus-1-=

Joachimus Varenholt Hamburgensis-1-*

Ludovicus Wisenhavern Hildesia-Saxo-1-#

Godscalk Rantzow Holsatus-1-*

Johannes Löser in Pertzsch Saxo-1-#

Petrus Syringus Hildesheimus Saxo, J.U.L.-1-#

Jacobus Albinus Hala-Saxo-1-#

Christianus junior princeps Anhaltinus comes Ascaniae-1-#

Heino Rabe Megapolitanus n[obilis]-1-*

Daniell Rantzouw Holsatus-1-*

Rudolphus Susius Embdanus-1-+

Maximilianus Öleman Brunsvicensis Saxo-1-*

Daniel Wensin Holsatus-1-*

Laurentius Wensin Holsatus-1-*

Franciscus ab Alefeldt Holsatus-1-*

Johann Holst Holsatus-1-*

Antonius Welterich Dithmarsus-1-*

Adam von Winterfeldt aus der Mark Brandenburch-1-=

Bougislof Matthieu Schmecker de Meldenbur-1-*

Joannes Hassius Hajna-Misnicus, J.U.D.-1-#

Nicolaus Kellinchusen Hamburgensis-1-*

Arnoldus Barchman Emdanus orientalis Frisius-1-+

Daniel a Bockwoldt Holsatus-1-*

Jacob von Bennigsen eques Braunswicensis-1-*

Jeronymus Brandt von Arnstedt nobilis Marchicus-1-=

Jurrian von Iddingerodt Brunswicensis-1-*

Henning Lewin von Arnstedt-1-#

Joachim Caspar de Raythou Braunschweig-1-*

Benedictus Brocktorff Holsatus-1-*

Detlevus Brocktorff Holsatus-1-*

Folchardus a Marck Frisius orientalis-1-+

Hans Richardt Sibergh Marchicus, T[eutonici] O[rdinis] E[ques]-1-=

Henricus Houmest Bremensis Saxo-1-*

Georgius Marschalck, dioecesis Bremensis-1-*

Johannes Heinricus Boje eques Misnicus-1-#

Johannes de Line Bremensis Saxo-1-#

Theodorus ab Oeselen Flensburgensis Holsatus-1-*

Huldericus Christophorus ab Ende Misnicus-1-#

Johannes Limnæus Jenensis Thuringus-1-$

Henning Lubbren Hildesia-Saxo-1-#

Ernestus Fridericus Scheurl Helmstadiensis-1-#

Theodori Hohusen von Hamburch-1-*

Magnus Löser Misnicus eques-1-#

Gothofredus Bernhardt Tyrigeta-1-$

Bernhart von Langen auf Oberstaht und Breitenba[c]h graffschaft Hennenberg-1-$

Melchior ab Hagen Thyringus-1-$

Christophorus Friesse Berlinensis Marchicus-1-=

Otto Christophorus a Worbs Thyringus-1-$

Johannes Berenbergius Hamburgensis-1-*

Henricus Julius a Veltheimb-1-*

Justus Behr Luneburgicus-1-*

Joachimus Fridericus de Veltheimb Brunsvicensis-1-*

Jacobus Wenmaring Lunæburgicus-1-*

Johan Georg von Arnstedt nobilis Halberstadensis-1-#

Haubolld de Starschedell eques Misnicus-1-#

Paulus Rantzovius Holsatus-1-*

Henricus Luntzman Hamburgensis-1-*

Liborius de Line Bremensis-1-*

Huno Jonas Hunnius ab Eidora Holsatus-1-*

Andreas Wernick von Cölln an der Sprew Marchicus-1-=

Joannes Scultetus Stetena-Mansfeldicus-1-#

Joachimus Prigge Hamburgensis-1-*

Henrich Damm Chilonio-Holsatus-1-*

Heinricus Wermelskirchen Embda-Frisius orientalis-1-+

Johann Adolff Guttsloff Holsteiner-1-*

Maximilianus Augustus Gans liber baro in Puttlitz-1-=

Levin Ludolff von Alvensleben Paleo-Marchicus-1-=

Busso von Alvensleben Paleo-Marchicus-1-=

-1-Allemagne : Allemagne du Nord (Frise orientale, Brême, Hambourg, Brunswick-Lunebourg, Schleswig-Holstein, Mecklembourg), Brandebourg, Saxe, Thuringe

Allemagne du Nord-1-*

Frise orientale-1-+

La marche de Brandebourg-1-=

Saxe-1-#

Thuringe-1-$

1621-1630

Busso Heinricus a Bulow eques Braunswicensis-1-*

Ernestus a Redern eques Luneburgensis et Brunswicensis-1-*

Johann Sachs (Sax) Magdeburgensis-1-#

Tobias a Ponnickau Misnicus-1-#

Andreas Bernberg Hamburgensis-1-*

Fredericus Haertken Hamburgensis-1-*

Cornelius de Hertoge Hamburgensis-1-*

Burckhart Goldacker Duringer-1-$

Ulrich Schmidt von Magdeburgk-1-#

Johannes Costus Hala-Saxo-1-#

Ottho Rhöde Lubecensis-1-*

Hermannus a Dorne Lubecensis-1-*

Johannes Engelman Lipsiensis Misnicus-1-#

Tobias Finsinger Lipsiensis-1-#

Joachim Nes von Gustrow-1-*

Christoff Selmar von Berlien-1-=

Wolff Ditterich Stange auss Eisleben-1-#

George Berndt von Eysleben-1-#

Balthasar von Moltke Megapolitanus-1-*

Johannes Christophorus Meurer, J.U.D., Hamburgensis Holsatus-1-*

Heinrich von Einsidell auszn landt de Meissen-1-#

Christophorus a Cula Bremensis Saxo-1-*

Christian Pentz Holsatus-1-*

Henning Lützow von Lützow Megapolitanus-1-*

Johann Kettwich wonafftich zu Bremen-1-*

Albert Bake Bremensis Saxo-1-*

Bernhart Houckes Bremensis Saxo-1-*

Antonius de Sack Neomarchicus-1-=

Bernd Christoff von Sack-1-=

Ægidius Rulant Hamburgensis-1-*

Bodo a Bodenhausen-1-*

Curt (*ou* Lints) von Bodenhausem Brunschwicus-1-*

Johan Bherh Saxo-1-#

Friderich Bherh Saxo-1-#

Moritz von Marenholtz Saxo-1-#

Johannes Braun Lipsiensis Misnicus-1-#

Gothofredus Schmit Berolinensis-1-=

Albertus Weber Lipsiensis-1-#

Ulricus Ditmarus Hojensis-1-#

Jacobus Breyde Holsatus-1-*

Bendix Breyde Holsatus-1-*

Albertus Heckenberg Walsroda-Luneburgicus-1-*

Wilhelm von Polentz a Porusie-1-#

Johannes Grothe Rostochiensis-1-*

Balthasar a Brunne nobilis Marchicus-1-=

Achimus a Bredow nobilis Marchicus-1-=

Georg Lesse von Hildesheimb-1-#

Tilmannus Essenbrucherus civitatis Berolinensis-1-=

Wolff Dietterich von Taubenheim, eques Misnicus-1-#

Henricus von der Wyll auss der grafschaft Hoya-1-#

Jacobus Gualtherus von Dincklagen Emdensis Frisius orientalis-1-+

Joannes Potgeter Emdensis Frisius orientalis-1-+

Jacobus Metzner Naumburgensis Misnicus-1-#

Jost ab Hagenn Eisfelt-1-$

Carolus a Discau Misnicus-1-#

Abraham von Losz eques Misnicus-1-#

Hanns Lesse von Hildessheim-1-#

Nicolaus Kuntzelman Heiligenstadio-Eichsfeldus (pauper)-1-$

Jacobus a Straten Hamburgensis-1-*

Johannes Dow Husanus Holsatus-1-*

Luderus Buth Saxo-Bremensis-1-*

Carolus Heroldt Hala-Saxo-1-#

Hanss Bernhardt vonn Müchellen Misnius-1-#

Valentinus Ebertus Francofurtanus Marchicus-1-=

Heinricus Colander Weissenfelsa-Misnicus-1-#

Hans Heinrich von Schierstädt nobilis Saxo-1-#

Benjamin Schütz Weissenfelsensis Misnicus-1-#

Christian Ratlow auss Holstein-1-*

Christianus Kuster auss Brandenburckt (fuit famulus cujusdam nobilis)-1-=

Johannes Christophorus a Kötteritzsch eques Marchicus-1-=

Johan von der Hyls Bremensis-1-*

Henrich de Köm nobilis Misnensis-1-#

Joachim Sigismund a Löben Marchicus-1-=

Johannes Krumye Lucena-Misnicus-1-#

Johannes Wachman Bremensis Saxo-1-*

Frantz Jaco Freitag Frisius orientalis-1-+

Christophorus Heinricus Müffling Weis dictus-1-$

Johannes Joachimus Müffling Weis dictus-1-$

Benno Friederich Brand a Lindaw Saxo-1-#

Wilhelmus Christophorus Embdanus Frisius-1-+

Detleff Powisch eques Holsatus-1-*

Harderus Vake Flensburgo-Holsatus-1-*

Marcus Neidhartt Ascherschlebiensis ex episcopatu Halberstadensis-1-#

Joachimus Fridericus a Dyhrn-1-#

Otto Friderich von Molthen Megapolitanus-1-*

Joachimus Theodoricus de Stralendorff Megapolitanus-1-*

Christianus Schild in Thuringus-1-$

Nicolaus a Felgen Coesfeldianus Westphalus (Frisius orientalis-1-+)

Petrus a Felgen Coesfeldianus Westphalus (Frisius orientalis-1-+)

Hermannus ab Hachten Hamburgensis-1-*

Johannes Willers Hamburgensis-1-*

Christian Calmberg Lipsensis Misnicus-1-#

David Gloxinus Femariensis Holsatus-1-*

Daniel Powisch Holsatus-1-*

Jacobus Henrici a Dinclage Emdanus-1-+

Achatz a Quitzow Brunswicensis-1-*

Julius Augustus Vitus Wolferbytanus-1-#

Otto Wilcke vonn Bodenhausenn-1-#

Cuno de Bodenhausen ex agro Brunsvicensi-1-*

Wolff Rudolff von Ende ex Misnia-1-#

Dirick Engels Hamborgensis-1-*

Thomas Stampeel Hamburgensis-1-*

Eberhard von Rhedenn Bremensis-1-*

Lucas Bruggen Hamburgensis-1-*

Carolus Christianus a Goltstein nobilis Misnicus-1-#

Carolus Albertus a Goltstein nobilis Saxon[iensis]-1-#

Godefredus Hantschman Dresda-Misnicus-1-#

Wolffgangus Powische nobilis Holsatus-1-*

Casparus Michael Welschius Lipsiensis Misnicus-1-#

Albertus a Schulenburgk eques Misnicus-1-#

Henricus Tobing Hala-Saxo-1-#

Joachimus Muhle Hamburgensis Saxo-1-*

Nicolaus Schütze Rostochiensis Megapolitanus-1-*

Johannes Widovius Tunderensis Holsatus-1-*

Johan Schlebusch Hamburgensis-1-*

Johannes Erasmus a Schönfeldt eques Misnicus-1-#

Ernestus Dietericus a Schönfeldt eques Misnicus-1-#

David Ernst Döringk Misnicus-1-#

Zacharias Merian Brandeburgensis-1-=

Justus von Monnichusen Hamburgensis Saxo-1-*

Olaus Heinemarck Hatterslebia Holsatus-1-*

Nicolaus Jesse Hamburgensis-1-*

Iwosme Findequellis de Dresen [?]-1-#

Johannes Fickler Dresdensis-1-#

Johannes Georgius Reinhardt Berolino-Marchicus-1-=

Georg von Golter Hambourgensis-1-*

Johannes Hilling Frisius orientalis-1-+

Johannes Zisenis Hannovera-Brunsvigus-1-*

Enoclius Göckelius Nivemontanus-1-#

Zacharias Finsingerus Lipsiensis Misnicus-1-#

Cornelius Jansen der Junger von Hamborch-1-*

Christian-Fridricus Reichelm Hala-Saxo-1-#

Sebastian Walrave Hamburgensis-1-*

Siegfridt von Luttichaw eques Misnicus-1-#

Günther de Bünauu-1-#

George Proffit Misnicus-1-#

Johannes Margeret nobilis Hamburgensis-1-*

Georgius Albertus a Nitzchwitz nobilis Misnicus-1-#

Johannes Koell Hamburgensis-1-*

Joannes Heich Eichsfeldinus Heiligenstadiensis-1-$

Joachimus Abrahamus a Köseritz Saxo Lipsiensis-1-#

Hieronymus Sigismundt Pflugk Meissen-1-#

Daniel a Koseritz Saxo Lipsensis-1-#

Godthardus ab Hövelen Lubecensis Saxo-1-*

Daniel Müller Lubeca-Saxo-1-*

Johan Grasen Lubeca-Saxo-1-*

-1-Allemagne : Allemagne du Nord (Frise orientale, Brême, Hambourg, Brunswick-Lunebourg, Schleswig-Holstein, Mecklembourg), Brandebourg, Saxe, Thuringe

Allemagne du Nord-1-*

Frise orientale-1-+

La marche de Brandebourg-1-=

Saxe-1-#

Thuringe-1-$

1631-1640

Christian Ullerich de Hartinges Hausen Holsatiae-1-*

Ulricus Grip Hamburgensis-1-*

Trarcho Gathena Frisius orientalis-1-+

Weyardus Campen Embda-Frisius-1-+

Johannes Wiardi Embdanus Frisius orientalis-1-+

Simon Simonides Embdanus-1-+

Johan von Spreckelsen Hamburgensis-1-*

Johannes Laubegeois Embdensis-1-+

Leopolt Klencken Bravvius [?]-1-#

Franciscus Witzendorff Lünæburgensis-1-*

Johannes Macrin Berlinensis-1-=

Hermannus a Lengerinck Embda-Frisius orientalis-1-+

Christianus Rantzovius Holsatus-1-*

Petrus Voigt Rensburgensis Holsatus-1-*

Julius ab Aissema Hannovius Veteranus (Hanau *et* Embden)-1-+

Hieronymus von Dorne Lubecensis Saxo-1-*

Henricus Baleman Lubecensis Saxo-1-*

David Crumbstroe Lubecensis Saxo-1-*

Bernard Goldener de Lubecq-1-*

Petrus Bas de Lubecq-1-*

Jean Kriwes de Lubecq-1-*

Jeorgius Walther aus Holstein (famulus procuratoris Rantzovius)-1-*

Christianus Dutzenrodt d’Erffordt-1-$

Johannes de Warendorf Lubecensis-1-*

Theodorus Brömse Lubecensis-1-*

Henricus Schabbell Wismaria-Megapolitanus-1-*

Christianus Kuhlewein Lipsiensis Misnicus-1-#

Johannes Bolte Bremensis-1-*

Johannes Thursch Selvicensis Variscus-1-$

Johannes Cavenius Schonebergensis Megapolitanus-1-*

Philippus Jacobus Weichberger Lipsiensis-1-#

Gaiko Deteleef orientalis Frisius-1-+

Abrahamus Leopoldus Lubecensis-1-*

Albertus marchio Brandenburgensis-1-=

Christian Schult Dresda-Misnicus-1-#

Adolphus Leonhardus Stamler Frisius orientalis-1-+

Bartholomæus Djurcken Embda-Frisius orientalis-1-+

Hajo Rykenna Norda-Frisius orientalis-1-+

Johannes Georgius a Schönberg-1-#

Hans Wolff von Schonberg-1-#

Caspar Muller Hamburgensis-1-*

Georgius Borchers Kniphusa Frisius orientalis-1-+

Georgius von Kisslis Hisfeldensis Saxo (sub titulo paupertatis)-1-#

Johan Lutterloh Lunæburgensis-1-*

Geylerus a Dyskau eques Misnicus K.-1-#

Michael Königh Misnicus-1-#

Rudolphus Reinkingh Jeverano-Frisius orientalis-1-+

Henricus Meier Bremensis Saxo-1-*

Johannes Wachman Bremensis Saxo-1-*

Curdt von Lützow Megapolitanus-1-*

Martinus Boegkelin Güstrovio-Megapolitanus-1-*

Albertus Wolff de Hamburgh-1-*

Bernhardus Damke Hamburga-Saxo (*prisonnier à Orléans*)-1-*

Hermannus Hutten Lipsiensis-1-#

Theodoricus a Rheden Bremensis-1-*

Hans Christopher de La He Meckel [?]-1-*

Andreas Cramer Quedlinburga-Saxo-1-#

Henningus Schürer Lipsiensis-1-#

Heinrich von Ahlefeldt-1-*

Christianus Fabricius Holsatus-1-*

Christianus Drichbeeck Maegdenburgensis-1-#

Otto Mühlpfortt Hamburgensis-1-*

Matthias Wermelskircher Embda-Frisius-1-+

Jacobus Wermelskirch Emda-Frisius-1-+

Vincent Moller Hamburgensis-1-*

Alexander Kirchberg Rostoch-Megapolitanus-1-*

Hans Blum nobilis Holsatus-1-*

Petrus Gartz Hamburgensis-1-*

Jacobus Brogell (Bregell) Bremensis-1-*

Tido Henricus a Litha Bremensis-1-*

Henricus Wreden Adelebiensis Saxo-Brunsvigus-1-*

Ludwig Heinrich Mayer [?]-1-*

Philippus Ernestus a Selmnitz eques Thuringus-1-$

Ernestus Fridemannus a Selmnitz eques Thuringus-1-$

Johannes Grajus Isnaco-Thuringus-1-$

Michael Reiser Lubecensis-1-*

Simon Henricus Schweckhausen Bremensis-1-*

Niclas Ernst von Platen-1-=

Lorentz von Thinen Holsatus-1-*

Johan von der Wouwer von Hamburg-1-*

Melchior Lehman von Magdeburgh-1-#

Dominus Johannes Kerbach Saxo-1-#

Joachim Godersen Hamburgensis-1-*

Lorentz Schnitler von Hamburgh-1-*

Henrich Ruvoid Lubecensis-1-*

Jacobus Paulus Husanus Holsatus-1-*

Johannes Slüter Hamburgensis Saxo-1-*

Johannes von Eitzen Hamburgensis Saxo-1-*

Johannes Blom Holsatus-1-*

Didericus Blom Holsatus-1-*

Christianus Augustus Furschutz Lunæburgensis-1-*

Antonius Eckardt Erversburg Thüringus-1-$

Johannes Dalischau Bricensis Marchicus-1-=

Petrus Brauns Lubeca-Saxo-1-*

Joannes Friderich Marschalck Bremensis-1-*

Frantz Marschalk Bremensis-1-*

Pancratius Schülden (*ou* Ghüler *ou* Gülden) Heldburgensis Francus-1-$

Paulus Bower (Bauwer) Bremensis Saxo-1-*

Johannes Georgius a Delau Misnensis-1-#

Leopoldus Heinricus a Klitzing Saxo-1-#

Bartholomæus Battus Hamburgensis-1-*

Wolffgangus Glück Hamburgensis-1-*

Rudolphus Everdes Embda-Frisius orientalis-1-+

Christophorus Bernhardus Seuberlich Thuringus-1-$

Ottho Rosenbrock Harburgensis Lunæburgicus-1-*

Johannes Lindener Friberga-Misnicus, J.U.D.-1-#

Martinus Schele Hamburgensis-1-*

Augustinus Strauchl Delitianus Saxo-1-#

Jacob Sylm Hamburgensis-1-*

Hajo Conring Frisius orientalis-1-+

Bartholdus Wichman Hamburgensis-1-*

Laurentius Tribander Marchicus-1-=

Vincentius Fabricius Hamburgensis-1-*

Memmius Burinus Jevera-Frisius orientalis-1-+

Jacobus Schertlingk Hamburgensis-1-*

Paulus Berens Frisius orientalis-1-+

Otto von Estorff Lunæburgensis-1-*

Friederich von Kram Brunsvicensis-1-*

Johan Albert von der Decken-1-*

Henricus Ernestus de Cram Brunsvicensis-1-*

Heinrich Otto von der Decken aus Bremen-1-*

Jobst von Oppershausen nobilis Lunæburgensis-1-*

-1-Allemagne : Allemagne du Nord (Frise orientale, Brême, Hambourg, Brunswick-Lunebourg, Schleswig-Holstein, Mecklembourg), Brandebourg, Saxe, Thuringe

Allemagne du Nord-1-*

Frise orientale-1-+

La marche de Brandebourg-1-=

Saxe-1-#

Thuringe-1-$

1641-1650

Otto Henrich Protten Oldenburgensis-1-*

Heinricus Conradi Gera-Variscus-1-$

Henricus Alers Brema-Saxo-1-*

Borchardt von Hackelborn Bremensis-1-*

Andræas Geyer Dresdensis-1-#

Hans Loenwich Winsenhavern von Hilensheim-1-#

Cornelius Simons Hamburgensis-1-*

Pieter Blanek auss dem Stifft Bremen-1-*

Johan Schutte auss dem Stifft Bremen-1-*

Jacobus Morsius Hamburgensis-1-*

Martinus Röver Hamburgensis-1-*

Theodorus Petersen Hamburgensis, J.U.L.-1-*

Adolph Friderich von Hagen (Dagen) Meckelbu[r]gensis-1-*

Johannes von der Wisch auss Holstein-1-*

Henrich Rantzow auss Holstein-1-*

Samuel Melander Marchicus-1-=

Lorentius Henricus de Melzing eques Luneburgensis-1-*

Johannes Breiger Neoburgo-Luneburgicus-1-*

Julius Knorn Cella-Luneburgicus-1-*

Ludwig von der Asseburgh eques Magdeburgensis-1-#

Johannes Albertus de Mandelslo eques Brau[nsw.]-1-*

Hartwich von Perchentin, nobilis Saxo-1-#

Joachim von Perchenkin-1-#

Wolff Caspar von Lüttichau eques Müsden-1-#

Cyriacus Nieienberg Embecensis Lunæburgensis-1-*

Theodorus Ostman Hamburgensis-1-*

Johann Friedrich princeps Brunswicensis Lunenburgensisque-1-*

Johann Otto von der Deken auss dem Stifft Bremen-1-*

Christianus Augustus Fridericus de Honstedt Lunæburgensis-1-*

Johannes Henricus Ernesti Erffurtensis Thuringus-1-$

Erasmus Craus Neobrand[enburgo] Megapolitanus-1-=

Ernst Joachim von Plato Lun[æburgensis]-1-*

Oswaldus de Buchwalt eques Holsatus-1-*

Henricus de Buchwalt nobilis Holsatus-1-*

Henricus Polmannus Holsatus-1-*

Joannes Albertus Huswedel Rostochiensis-1-*

Carolus liber baro a Wezesswitz [?]-1-#

Jonas Zipffellippa von Leipzigk-1-#

Georgius Cöper Bremensis Saxo-1-#

Wulf von Alefeldt hereditarius in Hutten-1-*

Johannes Christophorus Schönbach Haberslebia-Holsatus-1-*

Christian Wilhelmus Hahn Mansfeldensis nobilis-1-#

Victor von Bulau nobilis Mansfeldensis-1-#

Johann Wilhelm Freitagh nobilis Frisius orientalis-1-+

Heinrich Friedrich Reinhardi Gera-Variscus-1-$

Johan Hipstede Bremensis-1-*

Michael Zarlangius Marchiacus-1-=

Christianus Reberus (Rober) Berenburgensis Anhaltinus-1-#

Fewo Fewen Embdanus-1-+

Timan Rudolphi Embdanus-1-+

Henricus Oldenburgh Bremensis Saxo-1-*

Gottfried Schneider Bitterfelda-Saxo-1-#

Meimarus Hoier Bremensis Saxo-1-*

Borchardus Eden Bremensis Saxo-1-*

Fridericus Wolpman Bremensis Saxo-1-*

Gebhard d’Alvensleben nobilis Magdeburgensis-1-#

Stephanus Schultetus Osterburgo-Brandenburgicus, M. D.-1-=

Matthias von Krosigk nobilis Anhaltinus-1-#

Justus Preisswerck Bremensis-1-*

Matthias Vieher Goslariensis Brunsvigus-1-*

Guilielmus Schlemoller Bremensis Saxo-1-*

Barthols von Spreckselen Hamburgensis-1-*

Hans Friedrich von Leisten (Lehsten)-1-*

Abrahamus Faber Martisburgensis Misnicus-1-#

Philipp Christoph von der Lancken nobilis Rugianus-1-*

Stäszlaff von der Osten nobilis Rugianus-1-*

Johan Friderich Coch Rostochiensis Megapolitanus-1-*

Nicolaus a Brocke (Bricke) ex diocoesi Bremensi-1-*

Sebastianus Brunneman Colonia Marchicus-1-=

Ove Brocktorf Holsatus-1-*

Johannes Christophorus Marci Lipsiensis D-1-#

Willichius Heister Holsatus-1-*

Anthon Gunther von der Decken eques Oldenburgensis-1-*

Johannes Wardenburgh Oldenburgensis-1-*

Christian Petrus Thode Stada-Bremensis-1-*

Matthias Schreiber Lubecensis-1-*

Vincentius Garmers Hamburgensis-1-*

Balthasar Marschalck nobilis Bremensis-1-*

Enno Ludovicus comes Frisiae orientalis-1-+

Wernerus Ladinges Bremensis-1-*

Johannes Alers Bremensis-1-*

Princeps Luneburgensis-1-*

Hermannus Storre Hi[l]desiensis Saxo-1-#

Johannes Westphal Berlino-Marchiacus-1-=

Godefred Kriwitz Lubicensis-1-*

Robert Hake Bremensis-1-*

Henry Hake Bremensis-1-*

Gosek von Buchwalt Hollsteiner-1-*

Daniel Lüders Hildesiensis-1-#

Diederich von Eichen (Eitzen) Hamburgensis-1-*

Johan Friedrich von Holstein Holsteiner-1-*

Johan Gothofriddo Freyer Jena Thuringus-1-$

Theodorus Winckel Hamburgensis-1-*

Ulricus Winckel-1-*

Georgius Albertus a Meüsbach nobilis Thuringus-1-$

Johannes Francke Lubecensis-1-*

Johannes Schultze Hamburgensis L.-1-*

Johannes Caspari Wetken Hamburgensis-1-*

Martin Fridrich Seidell Berlinas-Marchicus-1-=

Christoffer Sehestedt Holsatus-1-*

Eberhardus Zierenberg Bremensis-1-*

Bernhard Martenis Bremensis-1-*

Johannes Ulricus Wallichius Vinarea-Thuringus-1-$

Nicolaus Erasmus Nyssen Holsatus-1-*

Rudolph Gerlach Holsatus-1-*

Anshelmus de Pudewels Holsatus-1-*

Ludes von der Lith Bremensis-1-*

Carl von Friesen Misnicus-1-#

Jan-Magnus von Schauroth eques Misnicus-1-#

Heinrich Beermann [?]-1-*

Conrad Wedemhoff Lubecensis-1-*

Augustus Bussius Holsatus-1-*

Christianus Stegman Brandeburgo-Marchicus-1-=

Princeps Luneburgensis, 4 martii 1650-1-*

Joannes Gulielmus dominus a Kotzebutt-1-#

Brundic Pogweisch Holsatus-1-*

Joachimus Röder Lubecensis-1-*

Marcus Boch Hamburgensis-1-*

Andreas Erenreyter de Erenburch Frisius orientalis-1-+

Petrus Pauli Eiderostadensis Holsatus-1-*

Caspar Westermannus Hamburgensis, J.U.-1-*

Joannes Georgius princeps Meckelburgensis-1-*

Peter Rantzow Holsatus-1-*

Henningus Heinrichs Lubecensis, J.U.L.-1-*

Justus Balthasar a Werdum Frisius orientalis-1-+

Johannes Otto Lipsiensis-1-#

Henrich Kirchring Lubecensis-1-*

Johan Klevorn Lubecensis-1-*

-1-Allemagne : Allemagne du Nord (Frise orientale, Brême, Hambourg, Brunswick-Lunebourg, Schleswig-Holstein, Mecklembourg), Brandebourg, Saxe, Thuringe

Allemagne du Nord-1-*

Frise orientale-1-+

La marche de Brandebourg-1-=

Saxe-1-#

Thuringe-1-$

1651-1660

Wolffgangus von Buchwalt Holsatus-1-*

Gustavus Adolphus dux Mecklenburgensis-1-*

Anthonius baro d’Aldenburg-1-*

Nicolaus Brandt Sonderburgo-Holsatus-1-*

Martinus Muller Hamburgensis-1-*

Conrad Hesse Holsatus-1-*

Christophorus ………… eques Cu[rl]….. [*nom raturé*=Christophorus Wigand]-1-*

Charles du Ahrainstorff eques Megapolitensis-1-*

Augustus Fridericus Mockelius Hallensis-1-#

Christophorus Jacobus Mockhelius Hallensis-1-#

Christophorus Pitericus Bose eques Misnicus-1-#

Fridericus a Lenthe eques Brunsvicensis-1-*

Otto von Diskaw Misn[ensis] nobilis-1-#

Friderich (*ou* Heinrich) von Einseideln nobilis Misn[ensis-1-#

Joannes Balthasar Furmannus Saxo-1-#

Johann Vinth Heida-Dietmarsus-1-*

Conradus Wasmer Meldorpio-Dithmarso Holsatus-1-*

Henning Negendanc eques Megapolitanus-1-*

Joannes Witcopff Aurica-Frisius orientalis-1-+

Christian Clengel Dresda-Misnicus-1-#

Adolphus a Dieskaw Misnicus-1-#

Johannes a Dieskaw Misnicus-1-#

Dominicus von Uffele Hamburgensis-1-*

Georgius Michael Bacmeister Lunaeburgicus-1-*

Joachim Friedrich Carstene Lubecensis-1-*

Johannes Mennenga orientalis Frisius-1-+

George von Lengerke de Lubecq-1-*

Matthias Muller de Lubecq-1-*

Thomas Heinrich de Wickeden patricius Lubecensis-1-*

Johannes Ritter Lubecensis-1-*

Johannes a Vihacke (*ou* Wickeden)-1-*

Erdtmannus comes de Promnitz-1-#

Wolffgangus comes de Promnitz-1-#

Albertus a Schulenburg eques Misnicus-1-#

Friderich Korfey Gustro-Meckelburgus-1-*

Gunther Erich von Eitzen Hamburgensis canonicus-1-*

Andreas Brummer Lipsiensis Misnicus-1-#

Johan Stern Luneburgensis-1-*

Gerhardus Heinrics Lubecensis-1-*

Philippus Laurentius Hamelsorda-Bremanus-1-*

Philipp Jacob[us] Meurer Hamburgensis-1-*

Comes de Koningsmarck-1-=

Dux de Wymeren-1-#

Frederich Leopoldt von Schierstaethe de Misnia-1-#

Nicolaus Bennich Holsatus-1-*

Dux Meclenburgensis-1-*

Christophorus Joachimus a Felgenhauer nobilis Misnicus-1-#

Dierich Bartels van Lubeck-1-*

Adamus Georgius a Schlieben Marchiacus-1-=

Eustachius a Thumen, Marchiacus-1-=

Joachimus Erdtmannus a Burgstorff Marchiacus-1-=

Johann David Oppel Misnicus-1-#

Nicolaus Schwabe Holsatus-1-*

Albertus Schroder Holsatus-1-*

Antonius Pauli Dithmarsus-1-*

Theodorus Hardkopf Hamburgensis-1-*

Henricus Poleman Hamburgensis-1-*

Joachim Pumpe Hamburgensis. *Décédé le 30 décembre 1658*-1-*

Everhardus ter Braeck orientalis Frisius-1-+

Johannes Sebastianus Jacobi Schleusinga-Hennenbergiacus-1-$

Johannes Joachimus Chemnitz Berolinensis Marchicus-1-=

Christian Julius a Pölnitz nobilis Turingicus-1-$

Johann Christoph a Pölnitz nobilis Turingicus-1-$

Joannes Weisser Leucopetra-Misnicus-1-#

Hans a Katte eques Saxo-1-#

Nicolaus Carstens Lubecensis Saxo-1-#

Heinricus Gebhardus a Miltiz eques Misnicus-1-#

Albertus Fridericus ab Hünicke eques Marchicus-1-=

Daniel vom Kampe Hamburgensis Saxo-1-*

Johan Joachim vom Kampe Hamburgensis Saxo-1-*

Johannes Leonardus Sauter Lipsia-Misnicus-1-#

Ernst Christian de Bardeleben nobilis Oldenburgensis-1-*

Christian Fridericus ab Harling-1-#

Cornelius a Lukowin eques Misnicus-1-#

Joan de Overbeeke de Hamburg-1-*

Johannes Jeremias Reusnerus Wittenbergius Saxo-1-#

Georgius Viethen Holsatus-1-*

Justus Johannes Quittenbaum Patenhusa-Brunsvigius, Med.-1-*

Melchior Katte nobilis Saxo-1-#

Jean George de Ribbeck nobilis Marchico-Brandenburgensis-1-=

Curt Baltzer de Marwitz eques Neomarchicus-1-=

Ludolph Bertram Philip v[on] Lüderitz eques Marchicus-1-=

Johannes Georgius de Wedell nobilis Neomarchicus-1-=

Conradus de Born nobilis Neomarchicus-1-=

Luderus Stannarius ex inferiori Saxonia Bremensis-1-*

Johannes Henricus Kielman a Kielmanseck Holsatus-1-*

F.C. Kielman a Kielmanseck Holsatus-1-*

Naaman Bensen Strandfrisius Cimber-1-*

Fridericus Adolphus von Haugwitz-1-#

Joachim van Sprekelsen Hamburgensis-1-*

Eduard Ferdinand, comte d’Ostfriese-1-+

Johannes a Lengerke Lubecensis Saxo-1-#

Christianus Martius Bernburgo-Anhaltinus-1-#

Johann Christoff Ritzaeus Dessa-Anhaltinus-1-#

Friederich Hans Gloxin Slesvicensis-1-*

Andreas Kurtz Lubecensis-1-*

Joannes Kreis de Themar ex ducatu Heneburgensi-1-$

Dominicus Gartz Hamburgensis-1-*

Paul Otto de Viereck nobilis Megapolitanus-1-*

Adam Otto de Viereck gentilhomme de Mecklenburg-1-*

Hans Jacob von Holsn nobilis Marchicus-1-=

Bernard Adolph Metzsch nobilis Misnicus-1-#

Johannes Fridericus Rhetius Brandeburgensis Marchicus-1-=

Joachimus Fridericus de Schlaberndorff nobilis Marchicus-1-=

Ernestus Ludovicus de Gröben nobilis Marchicus-1-=

Bartholdus a Bulow Meglenburgicus-1-*

Nicolaus Harder natione Holsatus-1-*

Georgius Christophorus a Bulo eques Mecklenburgensis-1-*

Friedrich Jürgen von Meding nobilis Luneburgensis-1-*

Friederic de Gunteroth d’Holstein-1-*

Paulus Bornfeldt Lubecensis-1-*

Friderich Hecklawer Sleswicensis-1-*

Christian Gunther von der Osten eques Megapolitanus-1-*

Lucas Deichman von Rostock-1-*

Petrus Lutkens Hamburgensis Saxo-1-*

Vincentius Rump Hamburgensis Saxo-1-*

Henry Julius Duve Hannoveranus Brunsvicensis-1-*

Statz Friderich von Fulln Hoyensis Luneburgensis-1-*

Henricus Christophorus a Griesheim Quercocampanus-1-$

Joachim Frideric von dem Knesebeck Luneburgensis-1-*

Jacob Preuser Slesvicensis-1-*

Johannes Bukius Rostochiensis Megapolitanus-1-*

Curdt Ehrendtreich von Burgsdorff nobilis Marchicus-1-=

Johan Lorentz Myssbach (Misbach) Retz Marchicus-1-=

Henricus Hudeman Crempe Holsatus-1-*

Christianus Ernestus marchio Brandenburgensis princeps Bareithii-1-=

Matthias Ibbeken Aurica-Ostfrisius-1-+

Johann Adam de Schönning nobilis Neomarchicus-1-=

Hardewig Hobon Merseburgensis Saxo-1-#

Petrus Moth Holsatus-1-*

Chr….. Heinricus Lages Oscania [Halberstadt-Saxo]-1-#

Johannes Slaph Hamburgensis Saxo inferior-1-#

Joachimus Schnobelius Hamburgensis-1-*

-1-Allemagne : Allemagne du Nord (Frise orientale, Brême, Hambourg, Brunswick-Lunebourg, Schleswig-Holstein, Mecklembourg), Brandebourg, Saxe, Thuringe

Allemagne du Nord-1-*

Frise orientale-1-+

La marche de Brandebourg-1-=

Saxe-1-#

Thuringe-1-$

1661-1670

Melchior Friderich baron de Plotho-1-#

Gebhard Siegfried baron de Plotho-1-#

Christian Hambrock Hamburgensis-1-*

David Christian Loudewig Neomarchicus-1-=

Johannes Sibrandus Rostochiensis Megapolitanus-1-*

Wolffgangus Adolphus Marechall Thuringus-1-$

Georg Rudolff Marechal Thuringus-1-$

Joachim Friderich Cruger Ruppin-Marchicus-1-=

Samuel Cruger von Ruppian-Marchicus-1-=

Petrus Röver Hamburgensis-1-*

Dethlevus Steinman Holsatus-1-*

Hero Cramerus Bremensis Saxo-1-#

Bartoldus a Barquentin, noblis Megapolitanus-1-*

Detlevus a Barhentin, nobilis Megapolitanus-1-*

Christophorus Friderici Gustrovio-Megapolitanus-1-*

Fridericus Ulricus de Luderitz Marchicus-1-=

Fridericus Antoni Schröder Holsatus-1-*

Jacobus Landerhusen Hamburgensis-1-*

Matthaeus Stolterfoht Lubeca-Holsatus-1-*

Johannes Nieman Slesvicensis Holsatus-1-*

Johannes Andreas Niebaur Rostochiensis-1-*

Otto Fridericus a Diescau eques Misnensis-1-#

Peter von Spreckelsen Hamburgensis-1-*

Jean Vermehren Lubecensis-1-*

Melchior Heinrich Katte ex archiepiscopatu Magdeburg-1-#

Hansz Georg de Marwitz ex electoratu Brande[burg]-1-=

Churd Hildebrand de Marwitz ex electoratu Brande[burg]-1-=

Eddo Wilhelm Harringa Emda-Frisius-1-+

Jo[a]chim Plettenberg Hamburg-1-*

Wolderus von Spreckelsen Hamburgensis-1-*

Detlevus Brockdorf Holsatus-1-*

Otto Rumor Holsatus-1-*

Theodocius Rumohr Holsatus-1-*

Augustus Fridericus dux Sleswici et Holsatiae-1-*

Vincent Raiser Hamburgensis-1-*

Henricus Reventlaw eques Holsatus-1-*

Henningus Reventlaw eques Holsatus

Fredericus Guilielmus de Rochow-1-=

Conradus Reventlaw-1-*

Fridericus a Friesen nobilis Misnensis-1-#

Matthaeus Trainer Hamburgensis-1-*

Hans Rantzow eques Holsatus-1-*

Antonius Vinckler Lubecensis-1-*

Henricus Butendach Bremensis-1-*

Jeronimus de Fressen Lubeck-1-*

Detlef Rantzow Holsatus-1-*

Petrus Müller Holsatus-1-*

Henning Pape Uslaria Brunswigius-1-*

Conrad Constantin Gerolt Sorabastensi-Anhalt-1-#

Johan Heinrich Sterne Saxo-1-#

Fridericus Helm Holsatus-1-*

Petrus Axen Husum Slesvicensis-1-*

Georg Ehrenreich de Pfuell eques Mansfeld-1-#

Jacob Blume Oldelandia-Bremensis-1-*

Jonas Albertus de Meusbach eques Voigtlandicus-1-$

Christian Fredericus Janus Lichtenbergius Misnicus-1-#

Albertus Schreiningh Hamburgensis-1-*

Paulus Blumenzopff Reichenbachio-Variscus-1-#

Johannes Georgius ab Osterhausen Misnicus-1-#

Heinricus Quintus Ruthenus dominus a [Plavia *ou* Mervier ?]-1-#

Eghardus Christophorus Cnout (Knut) Mecklenburgicus-1-*

Joannes Leo a Krassow comes de Pansolin-1-*

Augustus Fridericus Danckwehrt Tönning Holsatus-1-*

Johan Kriwitz de Tarnewitz Megapolitanus-1-*

Albertus Cohl Hamburg-1-*

Joannes Leo a Krassow Krassinsky [*nom biffë*] comes de Pansolin-1-*

Nicolaus a Krassow Krassinsky [*nom biffé*] comes de Pansolin-1-*

Joachim Schrötteringk Hamburgensis-1-*

Vincentius Placcius Hamburgensis-1-*

Eberhardus Schlaff Tychopolitano-Holsatus-1-*

Valentinus Withut Hildesia-Germanus, J.U.D.-1-#

Christian Busch Hamburgensis-1-*

Henricus Meurer Hamburgensis-1-*

Godthardus Kirchringk Lubecensis-1-*

Andreas Gottfried Muller Lubecensis-1-*

Alexander Sigemund de Schönninge nobilis Marchicus-1-=

Albertus a Line Bremensis-1-*

Paulus Gerbrand Hamburgensis-1-*

Martin Christoph Gerdes Megapolitanus-1-*

Georgius a Berchem Bremensis-1-*

Statius Speckhan Bremensis-1-*

Dux Holsatiae-1-*

Berndt von Arnimb nobilis Marchicus-1-=

Augustus Heindrich Bone Bärnburgensis Anhaltinus-1-#

Albertus Sibelius Bremensis-1-*

Nicolaus Beekman Heida-Dithmarsus-1-*

Joachimus Ernestus Otto Beroli-Marchicus-1-=

Johannes Laubegeois Embda-Frisius-1-+

Christophorus Abrahamus de Crakau nobilis Thuringus-1-$

Theodore Coch Bremensis-1-*

Johann Bertholdt de Torgau en Saxe-1-#

Jo[a]chim de Papstein eques Marchicus-1-=

Johannes Axius (Artius) Hilshemiensis-1-#

Martinus Alberti Freiberg [?]-1-#

Johannes Tesmarus Bremensis Saxo-1-*

Fridericus Joachimus Turno Berolinensis-1-=

Petler Evertson von Sollingen-1-#

Ericus Fridericus Palms Norda-Frisius-1-+

Joannes Matthias Niesen Cellensis-1-#

Friedrich Rumohr Holsatus-1-*

Ferdinandus Stein Hildesiensis-1-#

Joannes Jacobus Söeling Hildesiensis-1-#

Matthias Ernst Clebrecht, J.U.D., Lunebrugensis-1-*

Nicolaus Henricus Michaelis Holsatus-1-*

Detlef Cruse Stada-Bremensis-1-*

Henning Stuer Hamburgensis-1-*

Dithmar Wachman Bremensis-1-*

Niclas Matthis Hempell Stadensis-1-*

Casparus Bosius Lipsiensis-1-#

Anton Johan Türcke Brunswicensis-1-*

Tilemannus Zerneman Emda-Frisius orientalis-1-+

Bartholdus Philippus Meurer Hamburgensis-1-*

Johannes Fischer Berolinensis Marchiacus-1-=

Joannes comes von der Nath-1-*

Feico Cönring Emda-Frisius-1-+

Fridericus Sam Luneburgicus-1-*

Antonius Beinhardt Rudolphipoli Schwartzburgicus-1-$

Joannes Georgius Gutzmer patricius Rostochiensis-1-*

-1-Allemagne : Allemagne du Nord (Frise orientale, Brême, Hambourg, Brunswick-Lunebourg, Schleswig-Holstein, Mecklembourg), Brandebourg, Saxe, Thuringe

Allemagne du Nord-1-*

Frise orientale-1-+

La marche de Brandebourg-1-=

Saxe-1-#

Thuringe-1-$

1671-1680

Gothofredus Findequeller (Vindekeler) Saxo Misnicus-1-#

Meynert Henrickson de Lubeck-1-*

Hans Ludowius von Rodnitz (Podnitz) Misnicus-1-#

Joachimus Fridericus Schenk baron de Landsberg-1-=

Otto Wilhelm Schenck baron de Landesberg-1-=

Melchior Kempis Hildesiensis Saxo-1-#

Bernhard Wedemhoff Lubecensis-1-*

Henricus Bernhard Meierus Bremensis Saxo-1-*

Jacob von Wulfen Holsatus-1-*

Laurentius Johannes Gronovius Hamburgensis-1-*

Hinreich von Grassow Saxo-1-#

Frantz Hinrig Wessin Saxo-1-#

Johannes Fridericus marchio Brandenburgensis-1-=

Christian Werner Borcke Neo-Marchiensis-1-=

Joannes Ther Schmitten Bremensis Saxo-1-*

Georgius Heldt Hamburgensis-1-*

J.C[hristianus] Here Hamburgensis-1-*

Nicolaus Vegesack Hamburgensis-1-*

Gothardt Wedemhoff Lübecensis-1-*

Johannes Parent Bremensis-1-*

Philip Enoch Heyland Guelpherbytanus Saxo-1-#

Simon Bousch Hamburgensis-1-*

Thedel Arnoldt de Walmoden eques Hildesiacus-1-#

Ericus Wildeshausen Hamburgensis-1-*

Johann Fridericus Renard Marchicus-1-=

Christophorus Winstman Hamburgensis-1-*

Joan Otto de Marwitz eques Neomarchicus-1-=

Joachim Werner de Bulow Saxo-Lauwenb[urg]-1-#

Melchior Ludovicus Westenholtz Saxo-1-#

Joan Louys de Bornstedt nobilis Marchicus-1-=

Petrus a Lengerke Hamburgensis-1-*

Simon Möller Hamburgensis-1-*

Christianus Ludovicus Kuhlewein Lipsiensis-Misnicus-1-#

Ignatius Bernardus Weninck Anhaltinus-1-#

Johann Georg Walter Tonninga-Holsatus-1-*

George Henri de Döring nobilis Luneburgicus-1-*

Petrus Westerman Hamburgensis-1-*

George de Plönnies Holsatus-1-*

Friderich Eilhard Schacht du pays d’Holstein-1-*

Anton Clemens du pays d’Holstein-1-*

Justus Henricus Voigt Hannoveranus-1-*

Bartholdus Huswedel Hamburgensis-1-*

Johan Bernd von Warendorff Lubecensis-1-*

Erich Wordenhoff Hamburgensis-1-*

Joannes Fridericus Fürsen Hamburgensis-1-*

Philipp Arnold Am-Ende Bremensis, med. doctor-1-*

Henry Andre Breiger Cella-Lünebourg-1-#

Justus Speirman Hannovera-Brunsvicensis-1-*

Albertus Schulte Hamburgensis L-1-*

Ludwich von Meranni von Falckenstein (Polenstein) ausz der March. Brandenburg-1-=

Diderich Henrich Rosinus Munda-Brunswigius-1-*

Georgius Rudolffus de Schomberg eques Saxo-1-#

Heinricus Fridericus de Schomberg eques Saxo-1-#

Helvicus Sylm Hamburgensis-1-*

Balthasar Henricus de Zaschnitz eques Saxo-1-#

Johann Syllems Hamburgensis-1-*

Arnold Herman von Lengerinck Frisius orientalis-1-+

Lucas Winckel Hamburgensis-1-*

Joachim Christoph Stisser Quedl.-Saxo-1-#

Carl von d[er] Lühe nobilis Megapolitanus-1-*

Matthaeus Slüterus Hamburgensis-1-*

Georg Petersen Lubecensis-1-*

Carolus Friedericus Färber Gustroviensis-1-*

Otto Diderich de Bulow nobilis Saxo-Lauwenburgicus-1-#

Erenreich de Moltken nobilis Meckelburgensis-1-*

Jurgen Otto de Münchausen Brunsvicensis nobilis-1-*

Johan August de Sprengell nobilis Megapolitanus-1-*

Reinhard Diderichs Cella-Lunaeburgicus-1-*

Henry Engelthen (Engelken) de Bremen-1-*

Georg Kopp d’Hamburg-1-*

Henricus Rapke Cellensis. *Décédé à Orléans le 4 avril 1679*-1-#

Christian Ernest Ram Holsatus-1-*

Johannes Matthias Crasmerus Gothanus-1-#

Johannes Henricus Avemannus Gothanus Saxo-1-#

Herman Conradt Schrader Gandersheim-Saxo-1-#

Alexander de Miltiz eques Misnicus-1-#

Georg Charlez de Charlowiz de Saxe-1-#

Charles Rudolph de Carlowitz eques Variscus-1-#

Gebhardus a Diescau de Saxen-1-#

Christophorus Hilmarus de Hardenberg Hannoveranus eques-1-*

Albertus Fridericus de Hardenberg Hannoveranus eques-1-*

Wolff Albrecht de Gabelentz Saxo-1-#

Johann Ernst de Osterhausen Saxo-1-#

François de Bremen Hamburgensis-1-*

Ludolphus ab Alvensleben Magdeburgensis-1-#

Johann Pape Luneburgensis-1-*

Christophorus Wiegers Hamburgensis-1-*

Henricus Rudolphus Redequer Mecklenburgensis-1-*

Philipp Bernard baro de Pölnitz-1-$

Joann Georg Hugk Mecklenburgensis-1-*

Adolph Cunrad Langelotte Slesevice-Holsatus-1-*

Rudolphus Heinrich von Lüttichau-1-#

Jacob Peter Bonar-1-*

Carl Henric de Wulcknitz Saxo-1-#

Carol Gustavo Veguesack Hamburgensis-1-*

Petrus Muller Hamburgensis-1-*

Friderich de Wulcknitz Saxo-1-#

Johann Heinrich von Schwartzenfels Saxo-1-#

Johann Ernst von Schwartzenfels Saxo-1-#

Fridericus Ludovicus d’Hunefeld eques Thuringensis-1-$

Antonius Guilhelmus de Polnitz de Lusatia-1-$

Jean-Balthasar Bose nobilis Misnicus-1-#

Siegismund Fridericus de Carlowitz eques Misnicus-1-#

Christian Otto Helmolt nobilis Saxo-1-#

-1-Allemagne : Allemagne du Nord (Frise orientale, Brême, Hambourg, Brunswick-Lunebourg, Schleswig-Holstein, Mecklembourg), Brandebourg, Saxe, Thuringe

Allemagne du Nord-1-*

Frise orientale-1-+

La marche de Brandebourg-1-=

Saxe-1-#

1681-1689

Matthias Bartels Hamburgensis-1-*

Heinrich Christoff Metzsch nobilis Misnicus-1-#

Friedrich Wagner Mecklenburgensis-1-*

Thomas Balthasar Mevius Mecklenburgensis-1-*

Courdt Plato de Bennigsen Hannoveranus-1-*

Johannes Henricus Söhlen Blankenburgensis-1-#

Christophe de Plessen eques Mekl[enburgensis]-1-*

Guillaume Louis de Veltheim eques Brandenburgensis-1-=

W.E. a Bennigsen eques Saxo-1-#

Georgius Dietricus a Bulau eques Meckleburgensis-1-*

Henricus Julius de Veltheimb eques Brunsvicensis-1-*

Erich Schmiedt Hamburgensis-1-*

Henrick Hoddersen Oldenburg-Frisius-1-+

Albrecht de Felgen Aurica Frisius orientalis-1-+

Johann Stuhr Hamburgensis-1-*

George Schrötteringk Hamburgensis-1-*

Johannes Kentzler Hamburgensis-1-*

Laurentius Wördenhoff Hamburgensis-1-*

Joannes Werlhofius Lubecensis-1-*

Rudolph Ellinghausen Luneburgus-1-*

Ignatius Henricus Theodorus ab Horst [?]-1-*

Johannes Joachimus de Campe Hamburgensis-1-*

Franciscus Christianus ab Harstall eques Eichsfeldensis-1-$

Fridericus Wilhelmus ab Harstall eques Eichsfeldensis-1-$

Ulricus Winckel Hamburgensis-1-*

Ernestus Huldricus Pose Holsatus-1-*

Menno Richardus Verwer Embda-Frisius orientalis-1-+

Johannes ab Alefeld eques Holsatus-1-*

Wulfgangus Christianus ab Alefeld nobilis Holsatus-1-*

Petrus Meurer Hamburgensis-1-*

Johannes Georgius Vitzthumb ab Eckstet eques Misnicus-1-#

Friderich Holste Hannovera-Brunsvicensis-1-*

Adolf Brantz Hamburgensis-1-*

Johan Friederich Uffelmann Verdensis-1-#

Eilardus Andree Emda Frisius orientalis-1-+

Hemmo Menninga Embda Friso-1-+

Joachimus Westarphius Berolinensis-1-=

[A.] Steguer Misnensis-1-#

Elias August Stryke ex Marchia Brandeburgensi-1-=

Johann Henrich Schmidt Hamburgensis-1-*

Gottfredus Masta Lubecensis-1-*

Petrus Surlandt Hamburgensis-1-*

Christianus Fridericus Luben Berolinensis Marchicus-1-=

Henrich Friderich Lampadius Osterodensis-1-#

Jacob Wiegers Hamburgensis-1-*

Johannes Am Ende Bremensis-1-*

Johannes Zobel Bremensis-1-*

Ericus Busch Hamburgensis-1-*

Lucas de Campe Hamburgensis-1-*

Fridericus Ludolphus Braver (Brauer) Lubecensis-1-*

Johan von der Wich Holsatus-1-*

Bernhardus (*ou* Leonardus) Matfeldt Hamburgensis-1-*

Johannes Jacobus Becker Sverinensis Megapolitanus-1-*

Thomas Stolley Hamburgensis-1-*

Georgius Ehrenfriedericus de Naundorff eques Saxonicus-1-#

Hermannus Rudolphus de Feygell nobilis Lippiacus-1-#

Jacobus Willms Hamburgensis-1-*

Albertus a Bostel (Postel) Hamburgensis-1-*

Georgius Heinricus de Berenstin eques Saxonicus-1-#

Christoph Dietrich Bose eques Misnensis-1-#

Gregorius Nitschius, J.U.L., Misnicus-1-#

David Otto Hamburgensis-1-*

Jacobus Verpoorten Hamburgensis-1-*

Johannes Georgius Beckhoff Stada-Bremensis-1-*

Johannes Christianus Bacmeester, J.U.L., Zella-Lunaeburgensis-1-*

Adolphus Schrötering Hamburgensis-1-*

Henry Anthoine Stroube (Strube) Hoya-Luneburgicus-1-*

Bartholus Waltherus Hamburgensis-1-*

Henningius Lochau Hamburgensis-1-*

Friderich Guilielm Vitzthumb ab Eckstadt Saxo-1-#

Conradus Ernestus de Winckel eques Misnicus-1-#

Johan Ferdinand Kotzeboue Hannoveranus-1-*

-1-Allemagne : Allemagne du Nord (Frise orientale, Brême, Hambourg, Brunswick-Lunebourg, Schleswig-Holstein, Mecklembourg), Brandebourg, Saxe, Thuringe

Allemagne du Nord-1-*

Frise orientale-1-+

La marche de Brandebourg-1-=

Saxe-1-#

Thuringe-1-$

1721-1781

Justus Fridericus de Hanstein eques Eichsfeldensis-1-$

Ericus Christophorus de Stechew eques Marchicus Brandenburgensis-1-=

Henning de Ahlefeld eques Sleswicensis-Holsatus-1-*

Adolphus Fridericus de During eques Bremensis de Hornbourg-1-*

Fridericus Wilhelmus de Rex eques Saxo-1-#

Justus Fridericus Bernhardus de Helmkampff Brunsvicensis diocese de Hildesheim-1-*

Joachimus Augustinus Köppen de Berlin en Prusse-1-=

Johannes Jacobus Volkmannus Hamburgensis-1-*

Joannes Nicolaus Mioler Hamburgensis-1-*

Johannes Goddefredus Mioler Hamburgensis-1-*

-2-Allemagne : Westphalie et Cologne

Westphalie-2-*

Juliers, Clèves, Berg-2-#

Cologne-2-=

1602-1610

Conradus Gumpertus comes Bentheimensis-2-*

Marcus a Beiwegh Coloniensis-2-=

Wernerus Schlaun Gesicanus W[estphalus]-2-*

Wilhelmus Neukirchen Montanus-2-#

Adamus Begkers Juliacensis Nidegkensis-2-#

Wilhelmus Nesselrudt Montensis nobilis-2-#

Adolphus a Pempelfurdt Montanus-2-#

Hildebrandus ab Hardenrath Tremoniensis Westphalus-2-*

Johannes Daemen Juliacensis-2-#

Melchior Linck Coloniensis-2-=

Joannes Guligh Juliacensis-2-#

Walraff Schellardt von Obbendorff Juliacensis-2-#

Joannes Jacobus Bremann Coloniensis-2-=

Hanns Thederich von Metternich Juliacensis-2-#

Joannes Breman Coloniensis-2-=

Theodorus Thebens Westphalus Borkensis-2-*

Engelbertus Gülich Montanensis-2-#

Franciscus a Weyer Clivius Sicamber-2-#

Joannes a Virmondt ex terra Coloniensi-2-=

Guilielmus Keltzerus Unnensis Westphalus-2-*

Simon Bhendel (Bandel) dictus ab Haussen Aquisgranensis-2-*

Conradus Brynen Moersensis-2-*

Antonius Geilenkirchen Julia-Grevebrocensis-2-#

Bernhardus comes in Witgenstein-2-*

Arnoldus Raitz a Frentz Juliacensis-2-#

Joannes Roemer Monasteriensis Westphalus-2-*

Joannes Alarts Monasteriensis Westphalus-2-*

Wilhelmus Leeraedt Juliacensis-2-#

Franciscus Meinders Beilfeldianus Westphalus-2-*

Joannes a Goltstein Juliacensis-2-#

Johannes ab Hanseler Juliacensis-2-#

Bernardus a Goltstein Juliacensis-2-#

Dionysius Campius Aquensis-2-*

Conradus Ulricus Hoen ab Hoensbrouch Juliacensis-2-#

Joannes ab Arck Juliacensis-2-#

Winandus ab Horrich Juliacensis-2-#

Rembertus Ketteler Westphalus-2-*

Wernerus Nydegken Juliacensis-2-#

Theodorus Nydegken Juliacensis-2-#

Guilhelmus Lageman Germanus Inferior [?]-2-*

Hubertus Eylffen ab Heymerschem Coloniensis-2-=

Johannes Theodorus ab Humpesch Juliacensis-2-#

Michael Heck Juliacensis-2-#

Theodorus a Reck filius in Reck Westphalus-2-*

Johannes a Reck filius in Reck Westphalus-2-*

Joannes Warendorpff Monasteriensis Westphalus-2-*

Theodorus Morrien Westphalus-2-*

Petrus Beiwich Coloniensis-2-=

Joannes a Zwenbruggen natione Juliacensis-2-#

Wilhelm von Harff Montensis-2-#

Reinerus a Nienhuis Clivo-Clivensis-2-#

Wernerus Ouelacker Westphalus-2-*

Joannes Wasserfoer Assindanus-2-*

Georgius Bilgen Lasphæus Witgensteinensis-2-*

Henricus Birckmannus Colloniensis-2-=

Henricus Freye Venth Monasteriensis Westphalus-2-*

Hermannus Freye Monasteriensis Westphalus-2-*

Joannes Heerde Monasteriensis Westphalus-2-*

Hermannus Heerde Monasteriensis Westphalus-2-*

Joannes Gruter Monasteriensis Westphalus-2-*

Leonhardus van der Burch Osnabrugensis Westphalus-2-*

Jodocus Gummersbach Clivo-Xanthensis-2-#

Godefridus Verwayen Sanctensis Clivius-2-#

Joannes Walraven Monasteriensis Westphalus-2-*

Stephanus a Newerhoff vocatus Ley Markensis-2-#

Theodorus Myren Durstensis Westphalus-2-*

Ernestus Jacobus Rensinck Dorstensis Westphalus-2-*

Reinerus Rensinck Durstensis-2-*

Henricus Quadt a Kinckelbach Juliacus-2-#

Adamus Schluin [Montensis]-2-#

Conradus Heidenricus ab Oehr de Nottbeck Westphalus CH-2-*

Philippus Koilhasz Monasteriensis Eyffliae ducatus Juliacensis-2-#

Albertus Blanckenagell Susatensis Westphalus-2-*

Johannes a Dael Susatensis Westphalus-2-*

Melchior a Lipperheid ihn Scherling ex Vesta Rechlinckhusensi nobilis-2-*

Bernardus Thylman Resensis-2-#

Hermannus Nagell ab Izlinge Monasteriensis-2-*

Joannes Kerckerinck Westphalus Monasteriensis-2-*

Fridericus Stecke Ascindiensis-2-*

Magister Samuel a Cudsem patria Wesaliensis, gente Brabantinus-2-#

Wernerus ab Orsbeck nobilis Juliacensis-2-#

Jobst Adrian de Wendt Westphalus Ravensbergensis-2-#

Caspar Smisinck Ravensburgensis Westphalus-2-#

Henricus Keilman Hattneggensis 1608 Westphalus-2-*

Berthold Fridag zum Löhringhoff Westphalus-2-*

Schotus Freidach zur Buddenborch 1608 Westphalus-2-*

Gerhardus Falco de Galen zum Ermelinkhoffe Westphalus-2-*

Carcilius Renbagh Wassenbergensis Juliacensis-2-#

Franciscus Voetz Marcoduranus ducatus Juliacensis-2-#

Joannes Reichman Gangeltensis-2-*

Christophorus Trippelfuess Monasteriensis Westphalus-2-*

Joannes Reinfeldt Montensis-2-#

Marcellus Jebrant (Isbrant) Embricensis-2-#

Wernerus Monsen Juliacensis-2-#

Renerus ab Heimbach Juliacensis-2-#

Lutwig von Westphall Westphalus-2-*

Gerlacus Buxtorffius Hammonensis Westphalus-2-*

Berent von Heiden Westphalus-2-*

Christophorus Clute Monasteriensis Westphalus-2-*

Theodorus Ledebaur Westphalus-2-*

Johannes Wilhelmus Ledebaur Westphalus-2-*

Henricus Ringelius Westphalus-2-*

Theodorus Junger Westphalus Kerchellensis-2-*

Johan Löw von und zu Steinfurt-2-*

Jacobus Gogh Schermbeca-Clivus-2-#

Joannes Schrick Aquensis Germanus-2-*

Joannes Holter Clivius-2-#

Rutgherus Abelis Clivensis ex urbe Gochensi-2-#

Maximilianus Gaill Coloniensis-2-=

Timannus Sickman Monasteriensis-2-*

Joannes Bischopinck Telgetanus Westphalus-2-*

Hermannus Stortelbeck Monasteriensis Westphalus-2-*

-2-Allemagne : Westphalie et Cologne

Westphalie-2-*

Juliers, Clèves, Berg-2-#

Cologne-2-=

1611-1620

Petrus a Ghoer Montensis-2-#

Joannes a Weda Andernacus Coloniensis-2-=

Matthias Richardts Agryppinas-2-=

Johannes Schwaen Ubius-2-=

Joannes Guilhelmus Heisterman Montensis-2-#

Luetze ab Hoete Westphalus-2-*

Ludovicus Pier Coloniensis-2-=

Georg Heinrich von Chall [?]-2-*

Johannes ab Overcamp alias Krieger Eiffliacus-2-*

Henricus Eschenhagen Coloniensis-2-=

Gabriel Mattenclot Düsseldorpensis-2-*

Hildegerus Mattenclot Düssellopolitanus-2-*

Adolphus Henricus Droste a Vischering Westphalus-2-*

Bertramus a Nesselradt Montanus-2-#

Degenhardus ab Arnsberch Marco-Westphalus-2-#

Henricus Lipman ab Heil Marco-Westphalus-2-#

Benedictus Sivertz Paderbornensis-2-*

Gerwinus Huls Agrippinas-2-=

Gerhardus Pomilianus a Calckum cognomento Luchlmar-2-#

Wilhelmus Velbruggen Montanus-2-#

Christophorus Waldeck Warendorpius Westphalus-2-*

Godfrid de Steinenr Montensis-2-#

Johann Hilmer Spiegell von undt zu Pickelsheim-2-*

Antonius Lehm e Dura Juliacus-2-#

Joannes Roeve Meppanus Westphalus-2-*

Nicolaus van der Steyn Montensis-2-#

Friederich vons Spill bei Colen-2-=

Melchior Vehelenn Marcoduranus Juliacensis-2-#

Henrich Potgiesser Marchio-Westphalus-2-#

Henricus Edler Westphalus-2-*

Heinrich Christoff Kathen in West [?]-2-*

Otho Renerus a Rolshausen-2-#

Marsilius a Rolshausen Juliacensis-2-#

Reinerus a Broll Juliacensis-2-#

Ludovicus a Lulstorff zum Houen-2-*

Wilhelmus a Nesselradt zum Stein-2-*

Hilbrandus Plonies Monasterio-Westphalus-2-*

Matthias a Nesselradt Montensis-2-#

Lubbertus van Bronchorst de Cleve-2-#

Joannes Meinertz Monasteriensis Westphalus-2-*

Petrus vom Egen Wipperfurdensis-2-*

Guilelmus Ketzgenn zur Geersshoeven Juliacensis-2-#

Engelbert von der Wyck Widenbrugensis Westphalus-2-*

Bernardus Krane Monasterio-Westphalus-2-*

Sibertus ab Achtevelt Clivo-Embricensis-2-#

Joannes Volradt Ketteler Haselunnensis Westphalus-2-*

Winand von Grünberch Montanus-2-#

Conradus Justus Kumpsthoff Essendiensis-2-*

Bernardus Im Hove Marcoduranus-2-#

Henricus Fischett Coloniensis-2-=

Arnoldus Ende Tremoniensis W[estphalus]-2-*

Antonius l’Empereur ab Oppyck Coloniensis-2-=

Wennemarus a Damen Marco-Westphalus Lunensis-2-#

Johannes Regius Brisacensis Juliacus-2-#

Henricus Neuhoff Westphalus Schutterphiensis-2-*

Jacobus Mynnichius Steinfurtensis Westphalus-2-*

Joannes zur Lippe Monasterio-Westphalus. *Décédé le 2 décembre 1617*-2-*

Johannes Cothman Lemgoira-Westphalus-2-*

Bernardus Lersting Monasteriensis Westphalus-2-*

Caspar Ledebur ex Dinklage Westphalus-2-*

Herman Hallervordt Osnabrugensis Westphalus-2-*

Cornelius van [den] Bogaert Coloniensis-2-=

Bernhardus Schnarber Monasterio-Westphalus. *Décédé le 14 avril 1618*-2-*

Moritz Herman von Oynhausen-2-*

Joannes a Venhuven Clivo-Calcariensis-2-#

Jacobus Coppertz Juliacensis-2-#

Henricus Noetten Coloniensis-2-=

Jacobus Schriber Dalensis Juliacus-2-#

Aleph Timmerman de Jeger Clivo-Duisburgensis-2-#

Arnoldus de Vitinckhoff dictus Schell de Schellenberg-2-*

Bernart de Vitinckhoff dictus Schell de Schellenberg-2-*

Johannes Sibertus Küffler Coloniensis, medicinae doctor-2-=

Friederich Krauer Paderbornensis. *Sa mort probablement survenue le 27 avril 1619*-2-*

Johan Werner von Nihusen Paterbornensis Westphalus-2-*

Johann Vinck Osnabruga Westphalus-2-*

Henricus Berndts Clivo-Ressensis-2-#

Clamerus de Busch Westphalus-2-*

Theodorus Francken Sierstorpffius Juliacensis-2-#

Theodorus Bernardus de Lippia-2-*

Henricus Hoevel Clivo-Embricensis-2-#

Lotharius Froitzheim Brugensis, patriae Juliacensis-2-#

Johannes Deje, J.U.D., Westphalus-2-*

Johannes Heygen Wedanus-2-*

Joannes de Puteo Marcoduranus Juliacensis-2-#

Joannes Theodorus ab Efferen Juliacensis-2-#

Hermannus Kall Juliacensis-2-#

Antonius Uffelmann alias von Ufflen Susatensis Westphalus-2-*

Johannes Wuesthoff Susatensis Westphalus-2-*

Arnoldus a Wachtendonck Clivensis-2-#

Joannes Louuenbergh Coloniensis-2-=

-2-Allemagne : Westphalie et Cologne

Westphalie-2-*

Juliers, Clèves, Berg-2-#

Cologne-2-=

1621-1630

Theodorus Sighmannus, dioecesis Monasteriensis Westphalus-2-*

Cyriacus Mattenclodt Dusseldorpiensis Montensis-2-#

Matthias Bagen Coloniensis-2-=

Stephanus Sparmeker Clivo-Ressensis-2-#

Andreas ther Laen Lennep Coloniensis-2-=

Henricus a Redinchoven Dusseldorpio-Bergensis-2-#

Joannes Fredericus a Brempt ex Clivia-2-#

Johannes Streuff Embricensis-2-#

Joannes ab Haen Clivo-Gochensis-2-#

Bernardus Vallenborg Monasteriensis Westphalus-2-*

Maurice baron de Buren [22 augusti 1622]-2-*

Hermannus von der Knippenburgh Clivensis ad Amisiam-2-#

Cornelius von Rasfeldt Vesaliensis-2-#

Sylvester ab Huden Haselunenis Westphalus-2-*

Henricus Höhnraidt Sigbergensis prope Coloniam-2-=

Johannes zum Koette ex civitate Vredensi, dioecesis Monasteriensis-2-*

Balthasar Bunnigshausen ab Huxar-2-*

P Joannes Roch ord. S Francisci alias Recollectorum Coloniensis professus, *† 7 mars 1636*-2-=

Nicolaus Bysmans Aquisgranensis-2-*

Joannes Probst Porceto-Aquensis-2-*

Justinianus von der Knippenburgh Clivensis-2-#

Hermannus Crann Düsseldorpiensis Montanus-2-#

Johan de Galen Juliacensis-2-#

Carolus Franciscus Perez Aquisgranensis-2-*

Hermannus Crann Düsseldorpiensis Montanus-2-#

Johan de Galen Juliacensis-2-#

Carolus Franciscus Perez Aquisgranensis-2-*

Laurentius Keuchenius Castro-Juliacus-2-#

Robertus Weiler Berchemo-Juliacus-2-#

Conradus Engels Coloniensis-2-=

Casparus Gladbach Coloniensis-2-=

Matthias de Wendt Holtfeldiensis-2-*

Gualterus Henricus a Plettenbergh Nelensis-2-*

Theodorus Morrien Dulmanio-Westphalus-2-*

Ferdinandus Favereo Arnspergensis Westphalus-2-*

Bernhardus Steinwegh Embricensis-2-#

Gerardus Louwerman Embricensis-2-#

Nicolaus a Westerholt ex Westerholt Westphalus-2-*

Gwalterus a Brabeck Westphalus-2-*

Hermannus Oesthoff Westphalus-2-*

Bernardus Gassell Westphalus-2-*

Vincentius Fabricius Durstensis-2-*

Hermannus a Lansingh Embricensis-2-#

Caspar Kesterinck Westphalus Northornensis-2-*

Theodorus von Overkamp Monasterio-Eifflius-2-*

Albertus Bockhorst Monasterio-Westphalus-2-*

Melchior a Gaill Coloniensis-2-=

Casparus a Gaill Coloniensis-2-=

Anthonius Gebour Monasterio-Eifflius in ducatu Juliacensi-2-#

Theodorus Storck Marco-Gwestphalus Swertensis-2-#

Arnoldus ab Oynhausen Paderbornensis-2-*

Joannes Anthonius a Bautze Aquensis-2-*

Joannes Sebastianus a Bautze Aquensis-2-*

Constantin de Lyskirchen de Couloigne-2-=

Joannes Robertus ab Harff Juliacensis-2-#

Hermannus Munnich Steinfurtensis Westphalus-2-*

Henricus Munnich Steinfurtensis Westphalus-2-*

Johannes Hopper Clivensis ex Clivia-2-#

Reinerus Höven Bornheimensis, dioecesis Coloniensis prope Bonnam-2-=

Henricus Ameldunch Osnabruga-Westphalus-2-*

Joannes Petrus a Märcken Düsseldorpio-Montensis-2-#

Joannes Henricus a Winckelhausen Montensis-2-#

Christophorus a Leeradt Juliacensis-2-#

Wilhelmus Pabst Dusseldorpiensis-2-#

Matthias Halfius Coloniensis-2-=

Bernardus Eichrodt ~~Monasteriensis~~ (*nom noirci)*.(receptus ut famulus domini procuratoris)-2-*

Theodorus zur Megden Marco-Westphalus-2-#

Arnoldus Im Hove Marcoduranus-2-#

Matthias Foeller Coloniensis-2-=

Hermannus Coenhorst Monasteriensis Westphalus-2-*

Johannes Sigismundus a Kettler Clevensis-2-#

Christianus Clout Ratingensis-2-#

Gulielmus Pfeltzer Osnabruga-Guestphalus-2-*

Joannes Vergenius Gummersbachcensis Marchio-Westphalus-2-#

Constantinus a Beywegh Coloniensis-2-=

Johannes Wilhelmus Mockell Coloniensis-2-=

Joannes Wernerus a Leeradt Juliacensis-2-#

Joannes Dietmarus ditionis Markensis-2-#

Damianus ab Efferen Juliacensis-2-#

Johannes Ewaldi Müllheimensis Montanus-2-#

Joannes Aschenbergh Luna-Westphalus-2-*

Nicolaus a Felgen Coesfeldianus Westphalus (Frisius orientalis)-2-*

Petrus a Felgen Coesfeldianus Westphalus (Frisius orientalis)-2-*

Joannes Petrus Manth, dioecesis Coloniensis, patria Meckenheimensis-2-=

Henrich Flörcke (Störcke) Lemgovia-Westphalus-2-*

Franciscus Gise Hervordia-Westphalus-2-*

Joannes Guilielmus Wielach Coloniensis-2-=

Joannes Henricus a Ryswich Clivensis-2-#

Johannes Hubertus Tremoniensis Westphalus-2-*

Nevelinn Tilhenn Lemgovia-Westphalus-2-*

Degenhardus Joachimus Happen Burensis Westphalus-2-*

Henricus Mulert Monasteriensis-2-*

Christianus Weddemhoven Monasterio-Westphalus-2-*

Michael Lütgens Agrippinensis, J.U.D.-2-=

Bertramus Storm de Munster Eiffell Juliacus-2-#

Antonius Rutgeri Coloniensis-2-=

Godefridus Langen Monasteriensis Westphalus-2-*

Adamus Isinck Clivensis-2-#

Georg Brandlacht Westphalus-2-*

Henricus Holthaus Monasteriensis Westphalus-2-*

Peter von der Hagen Coloniensis-2-=

Theodorus a Bourscheidt Coloniensis-2-=

Johan von dem Broell cognomento Plater Marco-Westphalus-2-#

Hermannus Pistorius Juliacensis in pago Clingen natus-2-#

Georgius von Keppell Monasteriensis-2-*

Gerhart von Oesterwich Clivensis-2-#

Emmericus Haen a Kyrburch Clivensis-2-#

Henricus Rham Werlensis Westphalus-2-*

Conradus Schlicker Warburgo-Westphalus-2-*

Johann Winckellmann Ludinghusa-Westphalus-2-*

Constantinus a Rotkirchen Juliacensis Morcken-2-#

Theodorus de Krummel a Nechterschem Juliacensis-2-#

Johannes Theodoricus Muntz Dinslacensis-2-*

Petrus Gelsdorff Dinslacensis-2-*

Guilielmus Herckenbusch Rhinberckensis, dioecesis Coloniensis-2-=

Stephanus a Neuhoff Marco-Westphalus-2-#

Bernardus zur Lippe Monasterio-Westphalus-2-*

Henricus Doter (Soter) Montensis-2-#

Henricus Thier Nettelena-Westphalus-2-*

Joannes Witten ex dioecesis Monasteriensis civitate Bocholt Westphalus-2-*

Anthonius Smidjohan Monasteriensis Westphalus-2-*

Theodorus Reckwin Saltzcotzena-Westphalus-2-*

Petrus Buschman Westphalus-2-*

Cunradt Meier Paderborna-Westphalus-2-*

Joannes Broelmann Coloniensis-2-=

Henricus Leimgardt Essendiensis-2-*

Carolus Schorn Juliacensis Marcoduranus-2-#

Constantinus a Rottkirchen Coloniensis-2-=

Antonius Rham Ruthena-Westphalus-2-*

Wernerus ab Harff Juliacensis-2-#

Tilmannus Erckradt Montigena [?]-2-#

Henricus Oeckhoven Coloniensis-2-=

Joannes ab Heppenheim dictus a Saal Altenanus-2-*

Edoardus Pels Coloniensis-2-=

Arnoldus Bottermannus Clivo-Vesalius-2-#

Valterius Fourmenois de Colongne-2-=

Fridericus Smidtjohan Monasteriensis-2-*

Daniel Tegetmeier Minda-Guestphalus-2-*

Albertus van Munster Coloniensis-2-=

Henricus Korler Monasteriensis-2-*

Robert Keilchen Clivo-Vesalius-2-#

Theodorus Althoven Montensis Morspachius-2-#

Joannes ab Ossenbroch Montensis-2-#

Theodoricus Schmullingh Juliacensis-2-#

Wilhelm Bachman Dusseldorpio-Montius-2-#

Henricus Ketteler Coloniensis-2-=

Petrus Maes Coloniensis-2-=

Joannes Däll Coloniensis-2-=

Henricus Plonies Monasterio-Westphalus-2-*

Franciscus Adamus ab Herestorff Unckelius-2-=

Georgius Holtzbrinck Marco-Westphalus-2-#

Georgh Kumpsthoff Træmoniensis Westphalus-2-*

Rudolff Lubbert Monnick West[phalus] Eckhoff. †-2-*

Ernest Arnolt Mulart West[phalus] Lingensis-2-*

Goessen Heidenrick Schele West[phalus] Wellfeld-2-*

Schmellingius Drachter Cosfeldia Westphalus-2-*

Johannes Balduinus Stedingk Westphalus Monasteriensis-2-*

Rudolphus Vospollius Bilfeldia-Westphalus-2-*

Henricus Berniger Paderbornensis Westphalus, dioecoeseos Paderbornensis-2-*

Guilielmus a Gennip Zevenaria-Clivensis (mortuus est Antwerpiae)-2-#

Arnoldus Cran a Rurorht Agrippina Colonia-2-=

Johannes Block Monasteriensis Westphalus-2-*

Andreas a Beywegh de Colonia-2-=

Joannes Marcus a Beiwegh Coloniensis-2-=

Lambertus Corffei Osnabrugo-Westphalus-2-*

Otto Henricus Korff dictus Smising nobilis Westphalus ex Tatenhausen-2-*

Eberhardus Reck Camensis Guestphalus-2-*

Johannes Barckhausen Salis-Uffleniensis Lippiacus-2-*

Johannes Becx Coloniensis-2-=

Joannes Behmer Clivensis Belga-2-#

Godefridus Kramer Coloniensis-2-=

Goswin Michels Susatensis Westphalus-2-*

Joannes Ebertin Raitz a Frentz de Schlenderhan Juliacensis-2-#

Henricus Boichorst (Boicborch) Monasterio-Westphalus-2-*

Degenhardus de Merode Juliacensis (hic inscriptus est sub procuratore sequente)-2-#

Jodocus Philippus a Meschede in Almen, 19 octobris anno 1630-2-*

Wilhelmus Alardus a Meschede in Almen-2-*

Joannes Casparus Gerlaci Monasterio-Westphalus-2-*

Andreas Steinhausen Novesiensis-2-=

-2-Allemagne : Westphalie et Cologne

Westphalie-2-*

Juliers, Clèves, Berg-2-#

Cologne-2-=

1631-1640

Philip de Gnill Coloniensis-2-=

Ludwich Lambach [Dortmund]-Westphalus-2-*

Wilhelmus ter Beeck Clivo-Sevenariensis-2-#

Georgius a Swyterinck Westphalus ex arce Crestensi-2-*

Joannes Walraft Marcoduranus-2-#

Bernardus Gerckradt Coloniensis-2-=

Henricus Probstingh Westphalus de Werlis, J.U.D.-2-*

Gerhardus Swartt Lingensis Westphalus-2-*

Georgius Block Monasteriensis Westphalus-2-*

Jean George a Groppendorff Westphalus-2-*

Engelbertus Hecking Clivensis-2-#

Otto a Wylich Clivensi ducatu oriundus Gennipensis-2-#

Henricus a Gulich Osnabrugensis Westphalus-2-*

Petrus Holtzemius Coloniensis-2-=

Joannes Franciscus Heckingh Clivensis-2-#

Joannes Asbeck Westphalus-2-*

Ernestus Bitter Montensis-2-#

Justus Gleide (Szleier) Bilefeldia-Guestfalus-2-*

Joannes Albertinus Coloniensis (ob defectum pecuniae gratis)-2-=

Franciscus Vielthuett Ravensburgo-Westphalus-2-#

Gualtherus Steinlagen Clivensis-2-#

Statius Bodeker Herfurdensis Westphalus-2-*

Justus Bruningk Osnabruga-Westphalus-2-*

Johannes Theodorus ab Etzbach Montensis-2-#

Joannes Godefridus ab Hörde eques Westphalus-2-*

Theodorus a Landtsberg eques Westphalus-2-*

Adolphus Henricus ab Asschebroch eques Westphalus-2-*

Robertus a Stael eques Westphalus-2-*

Hermannus Jessen Susterensis-2-#

Joannes Reinardus a Krummell Monasterio-Eifflius-2-*

Joannes Cramer a Clauspruch Coloniensis-2-=

Anthonius Horn condictus Goltschmid Novesiensis-2-=

Ewaldus Hyrschbecher Monasterio-Eifflius Juliacus-2-#

Arnold von Herestorff-2-=

Johannes Emundus a Vlatten Juliacensis-2-#

Joannes Henricus ab Elmpt Julias-2-#

Daniel ab Elmpt Juliacensis-2-#

Jodocus Schorlemer Mindensis-2-*

Henricus Cothman Lemgovia Westphalus-2-*

Fr Anselmus Nicolaus Hartman a Riederen (il faut endurer pour durer) [?]-2-*

Fr Erasmus Sylvius Westphalus Monasteriensis-2-*

Wernherus Pagenstecher Steinfurto-Westphalus-2-*

Jodocus Dolberch Fuchtorpensis Westphalus-2-*

Gerardus a Megen, J.U.L., Agrippinas-2-=

Hieronymus Wesseling Reina-Westphalus-2-*

Assuerus a Lewen Clivensis-2-#

Wernerus ab Inden Marcoduro-Julias-2-#

Bertram de Nesselradt d’Erishoven Montensis-2-#

Hermannus Froninck Borkena-Westphalus-2-*

Hermannus Asschebergh Ravensbergensis-2-#

Henricus Berninck Monasterio-Westphalus-2-*

Philippus Heidentrich von Aschenbergh eques Westphalus-2-*

Gerhard Reinerman Marco-Westphalus Camensis-2-#

Joannes Theodorus Hambloch Coloniensis SS LLCbus-2-=

Henricus Snellen, SS LLCbus, Coloniensis-2-=

Joannes Andreas a Mulheim Coloniensis-2-=

Johannes Jacobus a Streithagen Juliacensis-2-#

Guilielmus a Binsfeldt Juliacensis-2-#

Hermannus Meier Lingensis-2-*

Henricus Beyman Clivo-Calcariensis-2-#

Johannes Bruers Coloniensis-2-=

Petrus Forvick Monasterio-Westphalus-2-*

Lambertus van den Hoff Sittardiensis Juliacensis-2-#

Casparus ab Amelunxen a Broxten Osnabrugensis-2-*

Theodorus Jodocus Hartman Osnabrugo-Westphalus-2-*

Philippus auff der Beeck alias Düsseldorp Clivo-Vesalius-2-#

Johannes Adamus ab Herestorff Coloniensis-2-=

Bernhard Spaen zu Cruiswyck Craneburgensis Clivensis-2-#

Damianus d’Harff Juliacensis-2-#

Hansditerich Heltman Duisburgensis-2-*

Henricus Guilielmus a Stein Embricensis-2-#

Johannes Carlier Coloniensis [*ou* Amstelo-Batavus]-2-=

Engelbertus a Braback ex Lethmate-2-*

Bernhardus Henricus Wolff Westphalus-2-*

Arnoldus Raden Aquensis-2-*

Joannes Hilgers (Heilgers) Agrippinas-2-=

Herman von Diepenbroich zu Buldren Westphalus-2-*

Antonius Scheiffhals Coloniensis-2-=

Henricus Kloppenborch Lingensis-2-*

Jost Edmund von Brabeck von Letmate-2-*

Woldek Weland Verdensis-2-*

Martinus Snellen Coloniensis-2-=

Gerhard von Vinkeln Husser-Cliveus-2-#

Cornelius Seulen patriae Juliacensis, diocesis Coloniensis-2-#

Philippus Akenschock Westphalus-2-*

Hermannus Ernst Hammonensis Marco-Westphalus-2-#

Adam Henry de Caldembach-2-*

Henricus Koninck Bucholdiensis Westphalus-2-*

Henricus Bunichman Westphalus-2-*

Fr Antonius von Hartman Westphalus, dioecesis Monasteriensis, Recollectorum allumnus-2-*

Petrus Codonæus Juliacensis-2-#

Joannes Wyginck Westphalus-2-*

Jacobus Janssen de Düsseldorff-2-#

Jodocus Grave Osnaburgensis Westphalus-2-*

Ghosvinus Brunes Bocholdiensis Westphalus-2-*

Georgius Bucksulberus Gwarendorpio-Monasteriensis-2-*

Johan Theodorus a Brincke Westphalus-2-*

Statius a Brinck Westphalus-2-*

Christian Wabens Coloniensis-2-=

Joachim Gisbert Fridag Monasteriensis Westphalus-2-*

Johan Herman von Diepenbruch h zur Empell, nobilis Clivensis-2-#

Johan Niess (Minss) Tremonia-Westphalus-2-*

Arnoldus Tegeder Westphalus-2-*

Henricus Spittaell Westphalus-2-*

Joannes Petrus Wintzler Bonna-Coloniensis-2-=

Arnoldus Birckman Coloniensis-2-=

Joannes Maes Coloniensis-2-=

Johannes Schellart de Oppendorp liber baro in Dorrenverdt, Muggenhausen-2-*

Conradt Rotger de Diepenbroick et Buld Monasteriensis Westphalus-2-*

Arnoldus Gisbertus Paghstecher Benthaemio-Westphalus-2-*

Matthias Lapp Bonna-Coloniensis-2-=

Joannes de Rode Sancto-Clivensis-2-#

Joannes Godlof de Bruyn Coloniensis-2-=

J Michael Glaser Agrippinas-2-=

Joannes Weidenfeldt Coloniensis ad Rhenum-2-=

Bernardus Hildebrandus Schnehagen Flamerscheimio Juliacensis-2-#

Wilhelmus Becker Coloniensis-2-=

Bernardus Henningius Coloniensis-2-=

Gerhardus Honthem Monasteriensis Westphalus-2-*

Georgius Wortmann Tremoniensis Westphalus-2-*

Ferdinandus Aldenhofen Bonnensis-2-=

Joannes Petrus Janssen Dusseldorpiensis-2-#

-2-Allemagne : Westphalie et Cologne

Westphalie-2-*

Juliers, Clèves, Berg-2-#

Cologne-2-=

1641-1650

Henricus Schnaphan Monasterio-Eiflius Juliacensis-2-#

Joannes Offerhausen Dusseldorpiensis-2-#

Joannes Merrhem Coloniensis-2-=

Reinhardus Hymmen Leudenscheidensis Marco-Westphalus-2-#

Adolphus Dorhoff Coloniensis-2-=

Wilh[elmus] Ferd[inandus] Caesar Clivensis-2-#

Martinus Haesbardt Mulhemio-Montanus-2-#

Winandus Hieronymus Raitz a Frentz Juliacensis-2-#

Petrus de Bergis Coloniensis-2-=

Casparus Godde Werlensis Westphalus-2-*

Casparus Kleinsorg Werlensis Westphalus-2-*

Balthasar Conradus Zahn Unnensis, Marco-Westphalus-2-#

Abraham Kayser Susato-Westphalus-2-*

Conrad de Niehausen Westphalus-2-*

Matthias Kox Coloniensis-2-=

Franciscus Petrus Mockel Marcodurano-Juliacensis-2-#

Johannes Michael Diepenbeck Montensis-2-#

Juste Hermann comte et noble seigneur de la Lippe, [23 julii] anno 1643-2-*

Gisbertus Bernhardus a Bodelschwingh, seigneur de Bodelschwingh, Marco-Westphalus-2-#

Theodorus Heil Marco-Westphalus-2-#

Christianus a Schloen cognomento Gehle Westphalus-2-*

Ernest Cord a Schloen cognomento Gehle Westphalus-2-*

Everhardus Duiskius Clivensis Belga-2-#

Joannes Wilhelmus von der Juden Coloniensis-2-=

Joannes Theodorus Caspars Dusselmontanus, dioecesis Coloniensis-2-#

Anthon Königh Brisaco-Juliacensis-2-#

Jacobus Israel Dusseldorpiensis-2-#

Ludger de Winckelhausen Montensis-2-#

Johannes Georgius Tils Cochemio-Coloniensis-2-=

Johannes Arnoldus de Boeckhorst Clivo-Cliviacus-2-#

Joannes Theodorus Iheu Sittardo-Juliacensis-2-#

Joannes Freyssen Sittardo-Juliacensis-2-#

Theodorus ab Hoevelick a Bimmen Clivensis-2-#

Wilhelmus Mockel Coloniensis-2-=

Petrus Mensingh Monasterio-Westphalus-2-*

Ernestus Melchior Mensingh Monasterio-Westphalus-2-*

Ferdinandus Jacobus de Morrien de Nortkirchen, diocoesis Monasteriensis-2-*

Johannes Bernardus de Morrien de Nortkirchen, diocoesis Monasteriensis-2-*

Johannes Becker Clivo-Vesalius-2-#

Conradus Feurbern Niehemio-Padibornensis-2-*

Henricus Noey Embricensis-2-#

Joannes Adolphus baro a Frens in Kendenich-2-=

Johan Constantin von Scharpffenstein genant Pfeill Coloniensis-2-=

Joannes Hesselingh Warendorpio-Westphalus-2-*

Joannes Langenhorst Monasterio-Westphalus-2-*

Joannes Dauber Dringenbergensis quae civitas est diocoesis Paderbornensis-2-*

Johannes Walfelt Westphalus Osnabrugensis-2-*

Hermannus Halveren Coloniensis-2-=

Godefridus Busdorff Coloniensis-2-=

Christianus a Ghoer Dusseldorpiensis-2-#

Nicolaus Robbe Aquensis-2-*

Hermannus Steffgens Juliacus, exul gratis-2-#

Hermannus Holscher Dulmaniensis Westphalus, exul gratis-2-*

Joannes Henricus Sorgfrey Coloniensis-2-=

Johannes Heidenricus ab Ascheberch Westphalus-2-*

Bernardus Ryckwins Clivo-Zevenaerensis-2-#

Joannes Hermannus Aldenkirchen Monasterio-Eifflius-2-*

Nicolaus Herbordus de Baer ex Baernou Westphalus-2-*

Everhardus Hermannus Brickwedde Osnaburgo-Westphalus-2-*

Georgius Delwigh Coloniensis-2-=

Henricus Eichen Marco-Guestphalus Hattingensis-2-#

Henricus Severini Hattinga-Westphalus-2-*

Hieronymus a Grassendorp nobilis Westphalus-2-*

Friderich Ludolphus Winckell Tecklenburgo-Westphalus-2-*

Johannes Gerhardus a Schrieck Ressensis-2-#

Eberhard Vette Osnabrugo-Westphalus-2-*

Joannes Roleman Monasterio-Westphalus-2-*

Elbertus Ludovicus ab Hertevelt a Colck nobilis Cliviensis-2-#

Adolphus Wüsthausz Schermbeco-Cliviacus-2-#

Wirich Adolph von Cloutt Moersensis-2-*

Simon Walther Pezelius [Detmold] [?]-2-*

Joannes Broich Juliacensis (*ou* Eckliacensis)-2-#

Georg Naderman Paderborna-Westphalus-2-*

Matthias a Kerckerinck de Giskinck Westphalo-Monasteriensis-2-*

Wernerus Zur Mühlen Warendorpio-Westphalus-2-*

Gerhart Gereon von Scharpffenstein genandt Pfeill Coloniensis-2-=

Theodorus a Rolinxwert Clivo-Vesaliensis-2-#

Andreas ab Elverich dictus Haas Clivensis-2-#

Franciscus Guilielmus Esch Essendiensis Westphalus-2-*

Clamer Esken Westphalo-Durstensis-2-*

Ignatius Franciscus de Haas Coloniensis-2-=

Amelingius Höneman Osnabrucka-Westphalus-2-*

Tilmannus Jrmans Dusselopaganus-2-#

Petrus Cupperus Aquisgranensis-2-*

Henricus Gelichman Gesekena Westphalus-2-*

Jacobus Mettingh Westphalus Lingensis-2-*

Henricus Grave Osnabruggensis Westphalus-2-*

Joannes Nölckenius Widenburgo-Westphalus-2-*

Gerhardus Schreiber Coloniensis-2-=

Joannes Henricus Ritz Gangello-Juliacensis-2-#

Joannes zum Putz Coloniensis-2-=

Johannes Hoffman Paderbornensis Westphalus-2-*

Johannes Vinhoven Brulensis-2-*

Georgius Willebrandus Kumpshoff Munstro-Westphalus-2-*

Johannes Meinders Bilfeldia-Westphalus-2-*

Johannes Fridericusa Lutzenrath de Rath Coloniensis-2-=

Franciscus Wilhelmus Lagemann Monasterio-Westphalus-2-*

Gerardus Casparus Cappel Elbervelda-Montanus-2-#

Conradus Meinders Bilfeldia-Westphalus-2-*

Anthonius Gibenius Gladbaco-Juliacensis-2-#

Joannes Anstatt Coloniensis-2-=

-2-Allemagne : Westphalie et Cologne

Westphalie-2-*

Juliers, Clèves, Berg-2-#

Cologne-2-=

1651-1660

Henricus Philippus a Nagell Monasterus nobilis-2-*

Joannes a Marle Monasterio-Westphalus-2-*

Tilman de Goor Moersensis-2-*

Joannes Philippus Klerck Coloniensis-2-=

Reinerus Wolterus Worn der Steghen Embricensis-2-#

Joannes Nuetten Aquisgranensis-2-*

Egbertus Hopp Udemia-Cliviacus-2-#

Joannes Hinssen Wesalia-Cliviacus-2-#

Joannes Simon Fabritius Dusseldorpiensis-2-#

Guilielmus a Borbeck Dusseldorpa-Montanus-2-#

Emundus Cremerius Juliacensis-2-#

Joannes Leonardus Schömmarth Juliacensis-2-#

Wernerus Hoeffschlag Lingensis-2-*

Joannes Bock Monasterio-Westphalus-2-*

Everwinus Steveninck de Willinckhegge Westphalus-2-*

Joannes Buschman Paderborna-Westphalus-2-*

Alexander Witten Clivia-Clivensis-2-#

Nicolaus Berighs Clivia-Embricensis-2-#

Theodorus Fuhrlohn Hervordia-Westphalus-2-*

Melchior Voets Dusseldorpiensis-2-#

Cornelius Kedd Coloniensis-2-=

Patroculus Leucken Clivo-Duisburgensis-2-#

Joannes Gabriel Fabri ex diocoesi Coloniensi villa Bonnensi-2-=

Justus Wetter Osnabrugensis-2-*

Joannes Damianus ab Harff Juliacensis-2-#

Wernerus Fridericus ab Harff Juliacensis-2-#

Nicolaus Camp Juliacensis-2-#

Joannes Godefridus a Redinchoven Dusseldorpio-Montensis-2-#

Wilhelmus Kupfer Dortmunda-Westphalus-2-*

Theodorus Henricus a Reck Dortmunda-Westphalus-2-*

Rudolph Grave Minda-Westphalus-2-*

Franciscus Motzfeldt Clivia-Clivensis-2-#

Joannes Weyerstrat Gul[icho]-Montanus ad Rhenum-2-#

Johannes Heidtfeldt Dortmunda-Westphalus-2-*

Arnoldus Henricus a Friesendorpff nobilis ex Marchia-2-#

Johan van Ruremundt Calcariensis-2-*

Gerrardus Florentius a Rees Embricensis-2-#

Engelhardus Adolphus Ducker Westphalo-Arensbergensis-2-*

Jodocus Hermannus Rave Borckena-Westphalus-2-*

Guilielmus Goseman Clivo-Gennepiensis-2-#

Alexander Wilhelmus ab Herten de Aenholt-2-*

Bernardus Forckenbeck Monasterio-Westphalus J.U.D.-2-*

Arnoldus Adrianus Hall sacerdos Juliacensis-2-#

Joannes Andreas Wort Paderbornensis-2-*

Engelbertus Emerici Juliacensis-2-#

Bartholdt Kloppero von Kloppersheim Petershaga-Westphalus-2-*

Edmundus Gerardus von Richterich Juliacensis-2-#

Renerus Wilhelmus a Richterich Juliacensis-2-#

Henricus Poll Hasaelunna (*lecture incertaine*)-Westphalus-2-*

Heinricus a Dwingelo alias Lutten ex Lotten Westphalus-2-*

Ernst Christian de Bardeleben nobilis Oldenburgensis-2-*

Hermannus Vilbrands Plonies-Westphalus-2-*

Bernardus Vilbrant Bochemio-Westphalus-2-*

Arnoldus Höbbelings Monasterio-Westphalus-2-*

Jodocus Ericus Schebner Dulmania-Westphalus-2-*

Theodorus Modeman Osnabrugo-Westphalus-2-*

Joannes Winandus Krufft Coloniensis-2-=

Bertramus Fabritius Horenbergio-Vestanus-2-=

Joannes Albertus a Freisheimensis eques Aquensis-2-*

George Israel Bergmann n[obilis] B. [?]-2-*

Guilielmus a Langen Clivo-Teisterbantus-2-#

Adamus van der Becke Ahlena-Westphalus-2-*

Henricus Motzfeldt Clivia-Clivensis-2-#

Ferdinandus Mensingh Monasterio-Westphalus-2-*

Bernardus Heerde Monasteriensis Westphalus-2-*

Damianus Adolphus ab Orsbeck de Julich-2-#

Joannes Casselius Coloniensis-2-=

Ferdinandt Schwegelius Coloniensis-2-=

Georgius Ernestus de Bockenvorde condictus Schungell Westphalus-2-*

Jean Edmundt von der Marck Marco-Westphalus nobilis-2-#

Michael Florens Brandis Westphalus Werlensis-2-*

Joannes Jacobus Graffen ab Eschweiler sub diocoesi Coloniensi-2-=

Theodorus Stephanus de Neuhoff Marco-Westphalus-2-#

Wernerus Wülffing Elverfelda Montanus-2-#

Joannes Creilingius Westphalus-2-*

Lotharius Theodorus Zur Megede Marco-Iserlohnensis Westphalus-2-#

Vincent von Isselstein Montanus-2-#

J. Quadt von Wickraedt Clivensis-2-#

Johannes Motzfeldt Clivia-Clivensis-2-#

Guilielmus Wever Marco-Westphalus-2-#

Conradus Billich Monasterio-Westphalus-2-*

Sixtus Staell Osnabrugo-Westphalus-2-*

Gerhardus Ohr Osnabrugo-Westphalus-2-*

Hermannus von Basserodt Monasterio Alena-Westphalus-2-*

Balthasar Caspar Zahn Unnensis Westphalus-2-*

Henning Christian a Schade Grevensteinensis Westphalus-2-*

Gerhardus Feltman Clivensis-2-#

Joannes Christophorus a Friesenhausen Westphalus-2-*

Gerardus Louwerman Clivo-Embricensis-2-#

Moritz de Donop Westphalus-2-*

Arnoldus Schnaphaen Monasterio-Eifflius-2-*

Fridericus Balthasar Voetz Dusseldorpiensis-2-#

Adrianus Seger Dusseldorpianus-2-#

Florens Otto Hendrick liber baro de Bylandt et Reydt-2-#

Johan Wilhelm von Siegen zu Sighen Coloniensis-2-=

Johannes Sölling Bochumia-Westphalus-2-*

Johannes Renthlin Dusseldorpiensis-2-#

Christianus Rutgerus Nettesheim Dusseldorpiensis-2-#

Melchior Herckenradt Montensis-2-#

Franciscus Hermannus Voetz Marcoduranus-2-#

Nicolaus Schnitzler Coloniensis-2-=

Joannes Theodorus Philipson Ravensperga-Westphalus-2-#

Joannes Theodorus Rave Borckena-Westphalus-2-*

-2-Allemagne : Westphalie et Cologne

Westphalie-2-*

Juliers, Clèves, Berg-2-#

Cologne-2-=

1661-1670

Cornelius Hermans Heinsbergh Coloniensis-2-=

Hermannus Mylius junior Coloniensis-2-=

Jacobus Haeck Zevenharia-Clivensis-2-#

Caspar Frans Monnich Osnabruga-Guestphalus-2-*

Christianus Beerninck Clivo-Vesalus-2-#

Thomas a Wilck Clivo-Vesalus-2-#

Wilhelmus Henricus Bertrams Julio-Berchemius-2-#

Joannes Wilhelmus Schœpperus Dusseldorpiensis-2-#

Constantinus a Rottkirchen Coloniensis-2-=

Joannes Esser Coloniensis-2-=

Joannes Rudolphus Kupgen Clivensis-2-#

Joannes Hogius Hulchradio-Coloniensis-2-=

Alexander Goeckman ex Monasteriensi Westphalus-2-*

Johannes Petrus ab Inden Marcoduranus-2-#

Fridericus Wilhelmus Motzfeldt Cliva-Clivensis-2-#

Arnoldus Duncker Quakerbruga Westphalus-2-*

Wilhelmus Gerardus de Lamswerde Clivensis-2-#

Julius Jacobus ab Aitsema Vesalia-Cliviacus-2-#

Joannes Albertus Brauman Aquensis-2-*

Nicolaus Voetz Juliacensis-2-#

Jeann Philipp Waltpott de Bassenheim d’Olbruck Juliacensis-2-#

Joannes Lubertus Veringn Osnabrugo-Westphalus-2-*

Wenemar [Die]terius von Sybergh Westp[halus-2-*

Gerhardus Isinck Embrica-Clivensis-2-#

Johannes Ernesti Minda-Westphalus-2-*

Conradus Ignatius Hartzheim Monasterio-Eifflius-2-*

Wilhelmus Deutgem Juliacensis ex Marcoduro-2-#

Joannes Wilhelmus a Schorlemer Westphalus-2-*

Jodocus Fridericus Sach Minda-Wes[t]phalus-2-*

Gustavus Georgius Balck Osnabruga-Westphalus-2-*

Arthus Reinold de Ovellacker ex Leete Westphalus-2-*

Christianus ab Heimbach Embrica-Clivensis-2-#

Thomas Hobbelt Monasterio-Westphalus-2-*

Gerhardus Jodocus Lethmate Rheno-Westphalus-2-*

Joannes Rutgerus Schloesseren Dusseldorpiensis-2-#

Johannes Henrich Grass wohnfestig binnen Aldenhoven ihm lands von Julich-2-#

Theodorus Stuve Osnaburgensis Guestphalus-2-*

Matthias Cronenbergh Euskirchio-Juliacensis-2-#

Johannes Henricus Goddaeus Block Westphalus-2-*

Georgius Fabricius Bentheimia-Westphalus-2-*

Georgius Henricus Lölgen Bonnensis-2-=

Goswinus Franciscus Klute Monasterio-Westphalus-2-*

Joannes Casparus Caspars Dusseldorpiensis-2-#

Ferdinandus Franciscus Adolphus de Landtsbergh in Erwitte Westphalus-2-*

Andreas Waldorff Coloniensis-2-=

Henricus Wernerus a Werich Clivo-Westphalus-2-#

Christianus Thenigh Vesalia-Clivensis-2-#

Otto Ortwinus Rave Borckena-Westphalus-2-*

Joannes Henricus Driver Raesfeldia-Westphalus-2-*

Johannes Wilhelmus Storck Osnabruga-Guestphalus-2-*

Theodorus tho Bockop Vesalia-Clivensis-2-#

Ferdinandus Weynants Embrica-Clivensis-2-#

Henricus Ernestus a Nehem in Ruhr Westphalus-2-*

Albert Justus ab Eberschwein Marcanus-2-#

Johan Gerhardt Mönnich Osnabruga-Westphalus-2-*

Matthaeus Klovekorn Osnabruga-Westphalus-2-*

Christophorus Theodorus Mönnich Osnabruga-Westphalus-2-*

Hermannus Christophorus de Hiddessen de principatu Paderbornensi Westphalus-2-*

Fridericus Wilhelmus a Gogreven Paderbornensis Westphalus-2-*

Christianus Ercklens Coloniensis (*lecture incertaine*)-2-=

Hermannus Josephus Latomus Coloniensis-2-=

Godefridus Bertramus de Herestorff Ubius-2-=

Franciscus Casparus Francken Sierstorff Ubius-2-=

Hermannus Dudenhausen Paderbornesis Westphalus-2-*

Gosvinus ab Esbach Guestphalus-2-*

Reintardus Hartman Clivo-Vesaliensis-2-#

Joannes Swibertus Schöler Caesarisinsulanus-2-=

Segerus Meesen d’Ellendorff [?]-2-*

Ortwinus Ernestus Rave Borckena-Westphalus-2-*

Matthias Ignatius Nipho Juliacensis-2-#

Bertram Rademacher Embrica-Clivensis-2-#

Joannes Goswinus Bomart Vesta-Coloniensis-2-=

Cornelius a Juchen Clivensis-2-#

Johann Eberhard de Horst Guestphalus-2-*

Guilielmus Colen Ravesteniensis-2-#

Joannes Casparus de Letmate von Langen Westphalus-2-*

Joannes Sigismundus Adolphus Bertram de Nesselrode Vesta-Coloniensis-2-=

Franciscus de Wendt ex Crassenstein Westphalus-2-*

Arnoldus Henericus Schreiber Monasterio-Westphalus-2-*

Godefridus Ebben (Obben) Clivensis-2-#

Bernardus Witte Gesekeno-Westphalus-2-*

Carolus Gerhardus Huiskenius Coloniensis-2-=

Philip Wilhelm Mockell Coloniensis-2-=

Franciscus Wilhelmus Meyer Bonnensis-2-=

Petrus Dussel Julias-2-#

Joannes Wilhelmus Dussel Julias-2-#

Joannes Holter (Holke) Ubio-Novesiensis-2-=

Joannes Henricus Havestadt Dülmanio-Guestphalus-2-*

Adolphus Wilhelmus baron Quaedt de Buchsfelt-2-*

Otto Henrich Quaedt baron de Buchsfelt-2-*

Joannes Schilling Marco-Guestphalus ex Bochumb-2-#

Johannes de Witt Vesalia-Clivensis-2-#

Wilhelmus Rickars Ruhrorto-Clivensis-2-#

Ferdinandus Rensing Coloniensis (*ou* Caesarisinsulanus (Kaiserswerth))-2-=

Franciscus Henricus Fabri Bonnensis-2-=

Damianus Henricus de Breun Bonnensis-2-=

Casparus Theodorus Reinhartz Werla-Westphalus-2-*

Philippus Wilhelmus Ignatius von Harff baron de Dreyborn-2-*

Joannes Wilhelmus Fabritius Juliacensis ex Wollerscheim-2-*

Michael Henricus Wonder Clivo-Duisburgensis-2-#

Joannes Melchior Ravekius (Kanekius) Coloniensis-2-=

Joannes Hermannus Stael Osnabrug-Westphalus-2-*

Theodorus Abeken Osnabruga-Guestphalus-2-*

Georg Marquartt Zusato-Westphalus-2-*

Rutgerus Gybkens Clivensis-2-#

David Davidis Unna-Westphalus-2-*

Carll Adam baro de Blitterstorff her von der Arff Juliacensis-2-#

Gerhardus Ernst Hammona-Marco-Westphalus-2-#

Christian Wilhelm Ferdinand de Plettenberg Marco-Westphalus-2-#

Fridericus Christianus a Plettenbergh Westphalus-2-*

Henricus Theodorus de et a Nihausen Westphalus-2-*

Casparus Rabanus a Droste ex Erwite Westphalus-2-*

Johannes a Santen Clivo-Vesaliensis-2-#

Johannes ther Stegen Vesalia-Clivensis-2-#

Gerhardus von Buytendyck Clivo-Vesaliensis-2-#

Johannes Reinerus Claut Bonnensis-2-=

Franciscus Casparus Claut Coloniensis-2-=

Jodocus Lemgovius Coloniensis-2-=

Joannes Antonius Dambroich Bonnensis-2-=

Bertramus Zacharias Kumpsthoff Tremoniensis-2-*

Franciscus Guilielmus Volbier Cloppenburgo-Westphalus-2-*

Albertus Boichorst Monasterio-Westphalus-2-*

Petrus Sellerus Reesa-Clivensis-2-#

Albertus Scheppenel Ahusano-Monasteriensis-2-*

Petrus Isinck Embrica-Clivensis-2-#

Henricus Johannes Nies Tremony-Westphalus-2-*

Johannes Henricus Keller Duisburgo-Clivus-2-#

Joannes Gerardus a Bonn Bonnensis-2-=

Johannes Gruterus Breckerfelda Marcanus-2-#

Jacobus de Grass Coloniensis-2-=

Otto Georgius de Schilder Vestphalus-2-*

Joannes Georgius Tondorff Vechta-Westphalus-2-*

-2-Allemagne : Westphalie et Cologne

Westphalie-2-*

Juliers, Clèves, Berg-2-#

Cologne-2-=

1671-1680

Ignatius von und zu Brencken Westphalus-2-*

Dominique de et a Brencken Westphalus-2-*

Ernestus Hilbrandus Plönies Westphalus-2-*

Adolph Hopp Holta-Clivensis-2-#

Joannes Remigius Burman Bonnensis-2-=

Joannes Henricus Laurents (Loerantz) Geienb [?]-2-*

Adolphus Henricus Nadeler Vechta-Westphalus-2-*

Jodocus Ketteringh Luna-Westphalus-2-*

Gerhardus Bingen Coloniensis-2-=

Fridericus Mauritius a Plettenberg Westphalus-2-*

Joannes Christophorus Asbeck Monasterio-Westphalus-2-*

Joannes Adolphus Ferdinandus baro de Gymnich in Gymnich-2-*

Maximilianus Henricus baro de Gymnich in Gymnich-2-*

Gervinus Hermannus Im Hove Duranus-2-#

Franciscus Petrus Mockell Duranus-2-#

Gerard van Dueren Ravensteniensis-2-#

Arnoldt Herman von der Portzen Clivo-Vesalus-2-#

Leo Julius de Dobbe de Marchia Westphalus-2-#

Simon Hemarus a Cappel ex Wallenbruck Westphalus-2-*

Friderich von Kreps Coloniensis-2-=

Joannes Georgius Roelen Juliacensis-2-#

Heidenricus a Letmate ex Langen Westphalus-2-*

Theodorus Henricus Bruchausen Monasterio-Westphalus-2-*

Simon Hilmarus ab Haxthausen Westphalus-2-*

Theodorus von Berth Clivo-Vesalus-2-#

Johannes Guinandus Pagenstecher Steinfurtensis Westphalus-2-*

Abraham Fetmenger Aquigranensis Dr.-2-*

Theodorus Henricus a Plettenberg Wewelspurgo-Westphalus-2-*

Joannes Arnoldus Wernerus baro ab Harff in Dreyborn Juliacensis-2-#

Joannes Caspar ab Esgen Montanus-2-#

Matthias Casparus Kleinsorgh Werdis-Westphalus-2-*

Joannes Godefridus Bequerer Bonnensis-2-=

Petrus Bequerer Bonnensis-2-=

Sibertus Halveren Coloniensis-2-=

Petrus Heyden ex Metternich-2-*

Cornelius Casparus Luttringhausen Agrippinas-2-=

Cornelius Henricus Pagenstegner-2-*

Hermannus a Venhoeven Clivensis-2-#

Joannes Gerardus a Megen Montanus-2-#

Leonart van Asten Stolberg-2-*

Franciscus Henricus ab Olmitssen dictus Mulstroh du pais de Juillet-2-#

Ignatius Gerwinus ab Olmitssen dictus Mulstroh Juliacensis-2-#

Johan Caspar Hopman Tremonia-Westphalus-2-*

Philipp Guillaume Pelser Coloniensis-2-=

Mathieu Voëtz Marcoduranus-2-#

Joannes Wilhelmus comes Palatinus Rheni, filius Philippi Wilhelmi ducis Neoburgi-2-*

Joannes Henricus Lappe Bonnensis-2-=

Godefridus Wilhelmus Burgers Dusseldorpiensis-2-#

Joannes Peregrinus Jaentzen Dusseldorpiensis-2-#

Joannes Petrus Gabriel Mattenclut Juliacensis-2-#

Henricus Ludolphus Rademacher Embrica-Clivensis-2-#

Johan Henderich Hetterman-2-*

Henricus Camberg Clivo-Vesalius-2-#

Johannes Adolphus Vogel Uffleniensis-Westphalus-2-*

Joannes Jacobus Codoneis Julias-2-#

Joannes Wilhelmus baro de Wymar ex Mertzenich Juliacensis-2-#

Rudolph de Hoja Minda-Westphalus-2-*

Florentius Petrus Pittenius Juliacensis, J.U.D.-2-#

Winandus Contzen diocesis Coloniensis-2-=

Justus Bernhard Barckhausen Salis-Ufflena Westphalus-2-*

Franciscus Adolphus Winandus baro de Eynatten Juliacensis ex Wedenau-2-#

Philippus Theodorus Dockweiler Ravensbergo-Westphalus-2-#

Arnoldus Godefredus Proff Julias-2-#

Theodorus Engelbertus de Cimont Freckenhorstio-Westphalus-2-*

Arnoldus Crane Bilefeldia Westphalus-2-*

Adolphus Henricus Linde Dattelensis, diocesis Coloniensis-2-=

Franciscus Guilielmus Hosius Monasterio-Westphalus-2-*

Nicolaus Meyknecht Linga-Westphalus-2-*

Joannes Hermannus Aldenkirchen Monasteriensis-Eyffliacus-2-*

Anton Werner Mintz Westphalus-2-*

Arnolt Hugo de Diepenbrorck Westphalus-2-*

Bernard Ernest Bischopinck Monasterio-Westphalus-2-*

Jean Engelbert Pelser de Cologne-2-=

Wilhelm Balcke Mella Osnabrugensis Westphalus-2-*

Philip Adolf de Pretlack Westphalus-2-*

Christoph Redequer Osnabruga-Westphalus-2-*

Christophorus Bernardus Schöpping Monasterio-Westphalus-2-*

Joan Marx Schonhoven Coloniensis-2-=

Christophorus Bernardus Zur Mühlen Monasteriensis-2-*

-2-Allemagne : Westphalie et Cologne

Westphalie-2-*

Juliers, Clèves, Berg-2-#

Cologne-2-=

1681-1689

Nicolaus Boemer Clivia-Reesensis-2-#

Joannes Renerus Dambroich Bonnensis-2-=

Matthias Knops Embrica-Clivensis-2-#

Joannes Mulert Lingensis Westphalus-2-*

Joannes Theodorus Woestman Osnabrugo-Westphalus-2-*

Christophorus Bernardus Hosius Monasterio-Westphalus-2-*

Johan Hinssen Wesalia-Clivensis-2-#

Juste Henri Hesselmeir Osnabrugo-Westphalus-2-*

Joannes Wilhelm Hopp Holta-Clivius-2-#

Franciscus Jacobus Hollandt Monasterio-Westphalus-2-*

Joannes Lucas Hosius Monasterio-Westphalus-2-*

Joannes Henricus Heerde canonicus Monasteriensis Westphalus-2-*

Casparus Huisch Ubius-2-=

Joannes Christophorus Rappares Vesta Coloniensis-2-=

Joannes Bartholomaeus Lommessem Caesarisinsulanus, dioecesis Coloniensis-2-=

Petrus Mensingh Monasteriensis-2-*

Petrus a Beywegh Coloniensis-2-=

Henrich Johann Brauer Tremonia-Westphalus-2-*

Hermannus Halveren Coloniensis-2-=

Severinus Poelman … Westphalus-2-*

Henricus Reinerus Koell Durstena-Vestanus-2-*

Reinhardus Hymmen Marco-Westphalus-2-#

Wilhelmus von de Wal Clivo-Wesaliensis-2-#

Gerhardus Ewich Clivo-Wesaliensis-2-#

Johan Therlorde Coloniensis-2-=

Joannes a Willigen Ravensteniensis-2-#

Otho Ludovicus Theodorus de Rasfeldt Essendiensis-2-*

Joannes Adolphus d’Eller alias de Boys Essendiensis-2-*

Albertus von der Beeke condictus Boichorst Monasterio-Westphalus-2-*

Bernardus Theodorus Gise … Westphalus-2-*

Rutgerus Aschenberg[h] Dusseldorpiensis-2-#

Mauritz Klamprinus Westphalus-2-*

Godefridus Bernardus Henricus ab Ascheberg Westphalus-2-*

Leo Julius Sutorius Werna-Westphalus-2-*

Johannes Adolphus Bachman Clivensis-2-#

Johan Rudolf Wetter Osnabruga-Westphalus-2-*

Alexander Widenbrugh Benthemia-Westphalus-2-*

Fridericus Wilhelmus Bachman Clivensis-2-#

Cyriacus Buschman Brulensis-2-*

Guilielmus Arnoldus Limpurg Bonnensis, archidiocesios Coloniensis-2-=

Lambertus Flaginck Linga-Westphalus-2-*

Joannes Henricus Bisschopinck Monasterio-Westphalus-2-*

Franciscus Henricus Offerhaus Hammona-Westphalus-2-*

Christophorus Ernestus Römer Monasterio-Westphalus-2-*

Johannes Reinerus Huge Monasterio-Westphalus-2-*

Henrich Caspar Veltman Tremonia-Westphalus-2-*

Christoph Bernardt Hollandt Monasterio-Westphalus-2-*

Daniel Gerhard Baumeister Osnaburga-Westphalus-2-*

Johannes Wernerus ab Inden Dura-Juliacensis-2-#

Mauritius Winckel Tecklaburgo-Westphalus-2-*

Joannes Wernerus Walradus Zur Mühlen Monasterio-Westphalus-2-*

Joannes Jacobus Wottendorff Monasterio-Westphalus-2-*

Joannes Wilhelmus Schorn Caesaris-Insulae diocoesianus-2-=

Bernardus Christophorus de Bueren Monasterio-Westphalus-2-*

Dieterich Wilhelm Herscheman Bilafeldia-Westphalus-2-*

Adam Esch Dusselomontanus-2-#

Christophorus de Binsfelt Dusselomontensis-2-#

Joannes Henricus Zur Mühlen Warendorpio-Westphalus-2-*

Wilhelmus Anthonius Flöckher Lintzensis Coloniensis-2-=

Joannes Lutgerus Hosius Monasterio-Westphalus-2-*

Joannes Franciscus Mappius (Nappius) Coloniensis-2-=

Matthias Contzen ex patria Coloniensi-2-=

Christianus Schoich Coloniensis-2-=

Joannes Andreas Eltman Coloniensis-2-=

Hermann Henricus Morrien Meppena-Westphalus-2-*

Johan Ge[r]hardt Ricker Aldenhovio-Juliacus-2-#

Georgius Theodorus Gulich Juliacus-2-#

Hermannus Frey Poll Vechta-Westphalus-2-*

Daniel Steingens Dusseldorpiensis-2-#

Bertram Zacharias Küpfer Dortmunda-Westphalus-2-*

Johan Herman Heitfeldt Tremonia-Westphalus-2-*

Wilhelmus Adolphus Küpfer Dortmundanus-2-*

Claudius Isaece Montensis, 2 julii 1687 (A.D.L., D 243, p. 6r)-2-#

Joannes Bartholomaeus de Schweitzhart Kerpensis ex Eifflia-2-*

Gerard de Lengerken Osnabrugensis Westphalus-2-*

Franciscus Wilhelmus Ludovicus Brakeliensis Westphalus-2-*

Antonius Norst Rhenobercanus patriae Coloniensis-2-=

Ernestus Wilhelmus Schedeing Monasterio-Westphalus-2-*

Joannes Christophorus Barcholt Warendorpio-Westphalus-2-*

Petrus Holtzemius Coloniensis-2-=

Johannes Georgius Lapp Bonnensis-2-=

Mauritius Meier Rheda-Westphalus-2-*

Franciscus Casparus Huisch Coloniensis-2-=

Wilhelmus Joannes Harsewinckell Wiedenbrugo-Westphalus-2-*

Petrus Arnoldus Beurhusius Tremonia-Guestphalus-2-*

Joannes Arnoldus de Reux Coloniensis-2-=

Arnoldus Wernike Monasteriensis Westphalus-2-*

Joannes Christophorus Bernardus Bisping Monasterio-Westphalus-2-*

-2-Allemagne : Westphalie et Cologne

Westphalie-2-*

Juliers, Clèves, Berg-2-#

Cologne-2-=

1721-1781

Carolus liber baro de Droste ex Senden, ecclesiae Monasteriensis canonicus-2-*

Georgius Adolphus liber baro de Nagel ex Ittingen, ecclesiae Monasteriensis canonicus-2-*

Joannes Bernardus Lipper Monasterio-Westphalus-2-*

Joannes Bernardus Munsterman Ahusa-Westphalus, J.U.D.-2-*

Joannes Hugo Vagedes Coesfelda-Westphalus.J.U.D.-2-*

Joannes Theodorus Henricus Vagedes Coesfelda-Westphalus. J.U.D.-2-*

Joannes Ludovicus Kemper Parisinus patre Westphalo natus-2-*

Bernardus Hermannus Bruchausen de Horst Westphalus, J.U.D.-2-*

Ferdinandus Wilhelmus liber baro de Reck ex Steinfurt, ecclesiae Monasteriensis canonicus-2-*

Joannes Corneli, cathedralis ecclesiae Paderbornensis vicarius-2-*

Johannes Philippus Veltman Osnabruga-Westphalus-2-*

Ernestus Constantinus liber baro de Droste ex Hülshoff ecclesiae Osnabrugensis canonicus-2-*

Joannes Christophorus Spading Monasterio-Westphalus-2-*

Henricus Adolphus Volbier Horstmario-Westphalus-2-*

Hermannus Nicolaus Fridericus Ludovicus de Beesten Benthemio-Westphalus, J.U. cand.-2-*

Franciscus Arnoldus Theodorus Alexander comes de Merveldt ex Westerwinckel, canonicus-2-*

Burchar[dus] Alexander comes de Merveldt diocesis Monasteriensis in Westphalia-2-*

Theodorus Jodocus Berninck Roxella Westphalus, ad Margaritam Monasterii vicarius-2-*

Casparus Nicolaus Mauritius liber baro de Kerckerinck de ,Borg, diocesis Monasteriensis-2-*

-3-Allemagne : Palatinat du Rhin, Hesse, le margraviat de Bade, Wurtemberg, Franconie, Souabe, Bavière

Palatinat-Hesse-Sarre-3-*

Bade-Wurtemberg-3-$

Franconie-Bavière-3-#

Souabe-3-&

1602-1610

Casparus Göckelius Staffelsteinensis Francus-3-#

Magister Georgius Weltz Herbipolensis Ostro-franco-3-#

Johannes Udalricus Hanser Friburgensis Brisgoius-3-$

Mathias Mösner Friburgensis Brisgoius-3-$

Michael Klingelius Neoburgensis Brisgous-3-$

Sebastianus Ritter Francofurdianus ad Moenum-3-*

Fridericus a Venningen in Konigspach Nemetanus-3-*

Wilhelm Kechler von Schwanndorff-3-$

Wilhelmus baro in Winnenberg et Beihelstein-3-*

Johannes Jacobus Vogtt de Vuendelstein-3-#

Hermannus a Doringenbergk-3-*

Henricus Ludovicus ab Hatzfeldt-3-*

Georgius baro a Gumppenberg Bavarus-3-#

Joannes Adamus Vöhlin a Frikhenhausen baro-3-#

Joannes Christophorus Vöhlin a Frickhenhausen baro-3-#

Otho Henricus a Berndorff Bavarus-3-#

Joannes Wiguleus a Weichs Bavarus-3-#

Magister Simon Lantzinger Monacensis Boius-3-#

Joannes Fasoldt Schrobenhusinus Bavarus-3-#

Carolus a Freyberg Suevus in Rannen-3-&

Wolffgangus a Ratzenriedt Suevus-3-&

Sebastianus Rucklynus Wirtzeburgensis Franco orientalis-3-#

Hieronymus Hammel Monacensis Bavarus-3-#

Martinus Folckhamerus Straubingensis Boius-3-#

Georgius Fuchs a Schweinshausslen Franco nobilis-3-#

Johannes Huldericus Sitsinger ab Holenstein Palatinus-3-*

Joannes Sigismund Wiedman a Bischberg Franco-3-#

Hanns Philip von Steinling zu Weikenricht vonhafftig in der Paltz-3-*

Cunradus Muller Herbipolensis Francus-3-#

Julius Schiller Augustanus Vindelicus-3-#

Joannes Baptista Im Hoff Augustanus Vindelicus-3-#

Georgius Wagner Norinbergensis-3-#

Magister Joannes Memming Zusmerhusanus Suævus-3-&

Georgius Tucher Noribergensis-3-#

Joannes Scheufelius Nurinbergensis-3-#

Ferdinandus baro a Törring et Seeveld Bavarus-3-#

Joannes Casparus Schnapp Cronanacensis Franco-3-#

Georgius Wilhelmus ab Ebleben Francus-3-#

Augustus Gremer von Augspurg-3-#

Christophorus Penninger Monacensis-3-#

Joannes Bayer Confluentinus-3-*

Erhardus a Muckhenthal Bavarus-3-#

Wolff Caspar Geichart von Creutzenach-3-*

Petrus Jülzinus Sultzbergensis Marchicus-3-$

Johannes Georgius Drechsel ab et in Unter Teufstetten-3-#

Joannes Christophorus Haio Bavarus-3-#

Joannes Fridericus Moll Passaviensis Bavarus-3-#

Sebaldus Tucher Noricus-3-#

Georgius Rosel Noricus-3-#

Philippus Hoeglens Moguntinus-3-*

Cunradus Muller Herbipolensis Francus-3-#

Johannes Casimirus comes Erpacensis-3-*

Christianus comes Waldeckus-3-*

Ludovicus Wolffius Marpurgensis Hassus-3-*

Georg Volckmar von Hain-3-*

Hermannus a Cronbergk-3-*

Volpertus Riedesell de Eysenbach-3-*

Christophorus Chemnitzius Stromberg Palatinus-3-*

Fridericus Gottfridus Kessler Oetingensis Suevus-3-&

Joannes Franciscus Münch Palatinus Heidelbergensis-3-*

Casparus a Waldenfels Francus-3-#

Johannes Ludovicus a Glauburg Francofordiensis ad Moenum-3-*

Philippus Schad Spirensis Nemetanus-3-*

Richardus Kilburger Treverensis-3-*

Hannsz Philipsz vonn Kedtenheym Palatinus-3-*

Peter Brettell von Landenberg Palatinus-3-*

Johannes Philippus Gebsattel Bambergensis-3-#

Wolff Christoph Gebsattell Bambergensis-3-#

Georgius Sperber Geroltshoviensis Franco-3-#

Johannes Daniel a Cronberg Palatinus-3-*

Joannes Planck Bavarus-3-#

Joannes Michael a Rechberg de Hohen Rechberg Suevus-3-&

Albertus Ernestus a Rechberg de Hohen Rechberg Suevus-3-&

Magister Thomas Reutter Monacensis Boiorum-3-#

Henricus Philippus a Stockheim Moguntinus-3-*

Johannes Melchior Rubellus (Röttlin) Bettbergensis Marchicus-3-$

Joannes Martinus a Werdnau Wirtenbergensis-3-$

Hugo Theodoricus ab Hornstein Suevus-3-&

Balthasarus ab Hornstein Suevus-3-&

Ferdinandus Ehinger a Baltzheim Ulmensis Suevus-3-&

Georgius Gölz Augustanus-3-#

Johan Rehe Gailndorffensis Lympurgensis-3-$

Rudolphus comes in Helfenstein, [12 octobris 1603]-3-$

Jodocus Weickmann Ulmensis-3-$

Daniel Besserer a Dalfingen-3-$

Wolfgangus Blarer a Wartensee-3-$

Christophorus Hafener Augustanus Vindelicus-3-#

Johannes Uldricus Österreicher Augustanus Vindelicus-3-#

Wolf Ferch de Nurmberg-3-#

Conradus Dilger Ulmensis-3-$

Johann Melchior von Schwalbach Hessus-3-*

Joannes Fridericus Eggs Rheinfeldensis Rauracus-3-$

Casparus Neuker Dilinganus Suevus-3-&

Joannes Bock Herbipolensis-3-#

Vitus Æmilius [?]-3-#

Hannsz Christoff von Schirnding-3-#

Georgius Andreas Gebsattell-3-#

Jacobus Heuspachius Suevus Acronianus presbyter, dioecesis Constantiensis-3-&

Bernardus a Gemmingen in Dieffenbrunn Suevus-3-&

Joannes Joachimus Humpis de Walltrams-3-$

Joannes Sigismundus Fuerer Norimbergensis-3-#

Adamus Melchior Mareschallus ab Ostheim Francorientalis-3-#

Ernestus Fridericus Mollinger Durlacensis Marchicus-3-$

Joannes Stödtner Bavarus-3-#

Georgius Wilhelmus a Kindsberg in Thurnau Francus-3-#,

Joannes Heinricus a Kindsberg in Thurnau Francus-3-#

Johannes Baptista Lenccius Creglinganus Francus-3-#

Johannnes Salfelt Marpurgensis Hassus-3-*

Philippus Eberhardus a Stockheim-3-*

Joannes Senheim Confluentinus ex archiepiscopatu Treverensi-3-*

Paullus Matthias Wehnerus Heltenbergius Francus-3-#

Lazarus Zeller a Leuberstorff Boius-3-#

Martinus Heussius Engensis Hegavus, dioecesis Constantiensis-3-$

Jacobus Mohl Neuffensis Wirttenbergicus-3-$

Maximilianus Fuggerus liber baro in Kirchberg et Weisenhoren, dominus in Babenhausen-3-#

Jacobus Fuggerus liber baro in Kirchberg et Weissenhoren, dominus in Babenhausen-3-#

Bernhardus a Mencingen Craichgoius-3-$

Johannes Bernhardus a Mencingen-3-$

Franciscus Arnoldus Heilpronnensis Francus-3-#

Philippus Ludovicus a Flehingen Graichgoius-3-$

Jacobus Reichardus ab Endingen Ettenheimensis-3-$

Guilhelmus Stahelius Bipontinus-3-*

Ludovicus Rieter a Cornburg Noricus-3-#

Stephanus Engelhardus Nicerulmensis, dioecesis Herbipolensis-3-#

Hanns Siegmundt Jelchlin [?]-3-$

Joannes Menhover Babenhausanus-3-#

Mathias Agricola [?]-3-*

Joannes Bernardus Hellmperger a Mosdorf Bavarus-3-#

Magister Paulus Troyer Erdingensis Bavarus-3-#

Joannes Conradus Mann Bizfeldensis Wirtembergicus-3-$

Jeremias Lieb Neidenauensis Moguntiacus-3-*

Ludovicus a Jannowitz Wirtembergensis-3-$

Albertus Frey Tabernæmontanus-3-*

Antonius Reichardus a Lützelburg-3-#

Marcus Conradus Derrer Vayhingensis Wirtembergicus-3-$

Johannes Georgius Hochstaterus Kitting[ensis] Francus-3-#

Johannes Ludovicus ab Hirschberg inn Leutershausen Palatinus-3-*

Bernhardus Resslin de Stuttgardia Wirttembergicus-3-$

Christophorus Lurtzius Werthemius Francus-3-#

Georgius Behem Hausanus-3-#

Johann Casimir von Rixingen [*ou* Réchicourt, Alsace] [?]-3-$

Johann Philippe von Emichsburg-3-$

Samuel Mann de Bitzfeld Wirtembergicus-3-$

Joannes Christophorus Harsdorfer Noricus-3-#

Joannes Wolfgangus Viepeck in Hauboltspach, Haimbhausen et Palzing Boius-3-#

Philippus Reyserus Marpurgensis-3-*

Otto Henricus a Gebsattell Franco-3-#

Ernestus Gros Pfersfelder dictus Franco-3-#

Joannes Hermannus Zobelius a Gibelstat Franco-3-#

Henricus Zobelius a Gibelstadt Franco-3-#

Georgius Orges Martinshemius Francus-3-#

Joannes Drehell Leugestensis Francus-3-#

Henricus a Stein Jettingensis Suevus liber baro-3-&

Johannes Caspari von Schatzhauszen Frison [?]-3-#

Wolffgangus Wilhelmus a Bernhausen Constantiensis-3-$

Joannes Theobaldus Meyer a Baumgarten Saccipolitanus [?]-3-#

Joannes Carolus Romelius von Weyl der Statt-3-$

Bonaventura Fortenbach ab Reichsschwandt Noricus-3-#

Johannes Fridericus Löffelholz a Kolberg Norimbergensis-3-#

Johannes Theodoricus Semler Norimbergensis-3-#

Ludowicus Guth a Sultz Wirtembergicus-3-$

Jobst Wielhelm von Schiernding-3-#

Joannes Georgius Barthenheuser-3-#

David Preislingerus Norimbergensis-3-#

Gabriel Tucher Norimbergensis-3-#

Paulus Haller von Hallerstein von Nuremberg-3-#

Bartholomæus Rauff Ambergensis-3-#

Henricus Augustinus a Staffell, dominus in Falckenstein-3-*

Joannes Victor a Liechtenau Monacensis Bavarus-3-#

Matthias Schlossbergerus Esslingensis-3-$

Joannes Albertus Fleischbein Seligenstadianus-3-*

Guilielmus Fuggerus liber baro a Kirchberg et Weissenhorn anno 1605-3-#

Ferdinandus Geizcoffer in Geilenbach Suevus-3-&

Marcus Anthonius a Rechlingen in Razihoven Suevus-3-&

Hainricus Antrecht Hessus Germanus-3-*

Henricus Hiller Burckhemio-Palatinus-3-*

Michael Schnabel Bockberg Palatinus-3-*

Matthias Venemarus Norimbergensis-3-#

Conradus Ludovicus Zobell a Gibelstat canonicus Moguntinensis et Herbipolensis-3-#

Philippus Adolphus ab Ernberg-3-$

Philippus Julius Fuchs a Dornhem-3-#

Christophorus Waldstromer a Dieppelsdorff Noribergensis-3-#

Adamus Lotharius Quad a Lantzkron-3-*

Daniel Gebsattell Bambergensis-3-#

Johannes Schubhardt Roemhildensis Franco-3-#

Hieronymus Strobl Monacensis Boius-3-#

Elias Niethamer Tubingensis Wirtembergicus-3-$

Christophorus Fronwein Francus-3-#

Thilmans Stehelin von Dinckselspiel-3-#

Laurentius Gampert Unternbrettensis Francus-3-#

Joannes Jacobus ab Eltz ex dioecesi Trevirensi-3-*

Hieronymus Fabri Monacensis Bavarus-3-#

Philippus Kirchenpaur Suevus-3-&

Joannes Casparus Lerchenfelder a Nabburg Palatinus-3-*

Joannes Wernerus Eremberg Friburgensis Brisgoius-3-$

Caspar Schinbein Trevirensis-3-*

Johannes Erhardus Krapff Vangio-3-*

Johannes Hieronymus Murr Noricus-3-#

Johannes Wilhelmus Hallerus ab Hallerstein Noribergensis-3-#

Joannes David a Malchenriedt Rhenanus-3-*

Augustus comes Palatinus Rheni, etc. [*immatriculé entre* 1604 *et* 1608]-3-*

Gabriel Ridler in Jhanskhirchen Monacensis Bavarus-3-#

Wolfgangus Ernestus Fuchs a Dornheim Franco-3-#

Christophorus Ludovicus Fuchs a Dornheim Franco-3-#

Georgius a Neuhausen Suevus-3-&

Wolffgangus Andreas Stiebar nobilis Franco-3-#

Georgius Pfizmarius Neuburgo-Palatinus-3-*

Johann Wilhelm Schott Palatinus-3-*

Johann Dieterich Schott Palatinus-3-*

Fridericus Erlbeck a Sinningen Palatinus-3-*

Melchior Altershamer Bavarus-3-#

Joannes Fuggerus junior baro in Kirchberg et Weissenhorn-3-#

Wolffgangus Henricus comes Eisenburgicus et Budingæ-3-*

Joannes Georgius Engelher Villinganus-3-$

Maximilianus Altershamer Bavarus-3-#

Philippus Clemens Saræpontanus-3-*

Esaius Plücher Augustanus-3-#

Conradus Sax Neuburgensis-3-#

Joannes Georgius Rütz a Grueb Passaviensis-3-#

Heinricus Gerhardus a Luschwitz Francus-3-#

Joannes Sebastianus Augspurger Spirensis-3-*

Gerhardt Paull, comitis Isenb[urgii] hoffmeister-3-*

Wilhelmus Rudolphus von der Thann-3-#

Jacobus Christophorus Wolffskeel a Rottenbaur Francus-3-#

Hieronymus Fuggerus liber baro in Kirchberg et Weissenhorn, etc., 1606-3-#

Georgius Fridericus a Creilshaim in Wustenm…-3-$

Johannes Ludovicus Lochinger a Archhoffen-3-$

Georgius Fridericus a Lentersheim in Neuen Muhr-3-#

Johannes Ernestus a Creilsheim in Hornberg-3-$

Adamus Strauss Suevus-3-&

Carolus Schlusselfelder Noribergensis-3-#

Stephanus Kötzler Noribergensis-3-#

Ludovicus Olevianus Heidelbergensis-3-$

Johannes Paulus Colerus Noribergensis-3-#

Joannes Renger Rotemburgo-Tuberanus Francus-3-#

Wilhelmus Trainer Norinbergensis-3-#

Justus Jungman Casselanus Hassus-3-*

Jeremias Dienger von Augspurg-3-#

Joannes Philippus Hesselerus Francofurtensis ad Moenum-3-*

Joannes Jonas Gödelman Spirensis-3-*

Johan Harttman Wolfhagensis Hessus-3-*

Joannes Kleynardus Treverensis Detzemius-3-*

Sebastianus Klezelius Bronouiensis Bavarus-3-#

Justus Held Nassovius-3-*

Gabriel Schuuenter Lorensis Brisgoius-3-$

Christophorus Marcus S.R.Imp. dapifer hæreditarius, baro in Walburg-3-$

Fridericus S.R.I. dapifer hæreditarius, baro in Walburg-3-$

Joannes baro in Bemelberg et Hochenburg, etc., 3 junii anno 1607-3-$

Georgius Dellünger Hydropolitanus Boius-3-#

Johannes Philippus Knebel a Catzennelenbogen-3-*

Joannes Mayr Suevus-3-&

Joannes Cæcilius Frey ex Keyserstuel Rhenanus-3-$

Philippus a Staffell Moguntinensis (canonicus Spirensis qui pridie advenerat)-3-*

Ludovicus Fridericus Och Boxbergensis Palatinus-3-*

Georgius Mertin Wembdingensis Bavarus-3-#

Johannes Schwarzenberger Ehingensis Suevus-3-&

Carolus Faber Moguntinus-3-*

Johannes Ludovicus comes Nassoviae Cattimelibocorum-3-*

Johannes Philippus comes Nassouicus Cattimelibocorum, 11 julii 1607-3-*

Georgius junior comes Nassouicus Cattimelibocorum-3-*

Neydhard Adam a Chreilshaim Franco-3-#

Wolfgangus Balthasar a Chreilshaim Francus-3-#

Casparus Geysius Cassellanus Cattus-3-*

Joannes Georgius Lung a Plönnegg Bavarus-3-#

Christophorus de Lerchenfeld-3-#

Daniel Nötelius Noribergensis-3-#

Andreas Gammersfelder Noribergensis-3-#

Joannes Joachimus Hartlieb dictus Walsporn Ambergensis Palatinus-3-*

Joannes Michael Steinhausen Confluentinus-3-*

Georgius Harttmuth a Walbrun in Ernsthoffen-3-*

Fridericus a Gemmingen Krichkowius-3-$

Philippus Theodoricus a Gemmingen Krichkowius-3-$

Reinhardus a Gemming Krichkowius-3-$

Jeronymus Willers Spirensis-3-*

Philippus Willerus Spirensis-3-*

Georgius Corvinus Moeno-Francofurtanus-3-*

Laurentius Wagenseill Noribergensis-3-#

David Leuttenraht Hassus Kirchainensis-3-*

Joannes Suicardus Moëck Moguntinus-3-*

Guilhelmus Jacobi Hassingius Confluentinus-3-*

Christophorus Keller Stuttgardianus Württembergicus-3-$

Reinerus Musiel a Bisingen-3-$

Bartholomæus von der Ecken-3-$

Joachimus Bayer Neopactanus-3-$

Joannes Carolus Rehlingerus a Rehlingen-3-*-3-#

Johannes Nicolaus Freigius Thomæ f[ilius] Nicolai n[obilis]-3-$

Johannes Georgius Weiss a Bintzenheim Badensis Marchicus-3-$

Joannes Guilielmus a Leonrodt Suevus-3-&

Joannes Egolphus a Leonrodt Suevus-3-&

Johannes Nutzelius Norimbergensis-3-#

Johann Jacob Heber Neagoræus Palatinus-3-*

Hieronymus Keis Monacensis Bavarus-3-#

Gabriel Nuzell Norimbergensis-3-#

Georgius Rösch Dilinganus, dioecesis Augustanae, Suevus-3-&

Guilielmus Grass Confluentinus-3-*

Johan Schneidt Cochemius, dioecesis Trevirensis-3-*

Mathias Scherll patria Norimbergensis-3-#

Paulus Hessus a Stain Noribergensis-3-#

Ericus baro de Heissenstain in Starnberg-3-#

Nicolaus Joachimus Clökerus Coburgensis Francus-3-#

Joannes Conradus Schertlin a Binzwang Suevus, dioecesis Augustanae-3-&

Pancratius Alemanus Werthaimensis Francus-3-#

Sebastianus Christophorus Rechlinger Augustanus-3-#

Rudolphus a Neuneck in Glatt Herbipolensis et Augustanae Vindelicorum canonicus-3-#

Johannes Henricus a Neuneck cathedralis ecclesiae Herbipolensis canonicus-3-#

Georgius a Werdnau de Pfohausen ex ducatu Wirtenbergensi-3-$

Burchardus a Schellenberg dominus in Hiffingen ex ducatu [*sic*] Constantiensi-3-$

Hartmannus Pyrr Rheinfeldensis Rauracus-3-$

Joannes Dieterich Norimbergensis-3-#

Joachimus Marsilius Greiffencla â Volratsz-3-*

Vitus Ulricus de Lichtenstein Francus-3-#

Volfgangus Jacobus a Bernhausen Constantinensis-3-$

Marcus Jacobus a Schönaw Schverstatensis-3-$

Joannes Hartmannus a Rockenbach Schopffensis-3-$

Reinhardus a Boyneburgh Hassus-3-*

Reinhardus ab Eschwe Hassus-3-*

Hildericus Antonius a Varell Francus-3-#

Wolfgangus Fridericus de Varell Francus-3-#

Georgius Tetzelius Noribergensis-3-#

Philippus Sebastianus Echter a Mespelbrun Francus-3-#

Joannes Guilielmus a Stozingen-3-$

Magister Marcus Ray Sigmaringanus Suevus-3-&

Joannes Ordolphus a Sandizell Bavarus-3-#

Magister Georgius Theusser Palatinus-3-*

Philippus Botius Moguntinus-3-*

Johannes Georgius Bechtius Heilbronna-Palatinus-3-*

Johannes Michael Engelhardus Vayhingensis Würtembergicus-3-$

Bartholomæus Haller Herbipolensis Franco-3-#

Georgius Dietmannus Herbipolensis Franco-3-#

Petrus Portner Ratisponensis-3-#

Josephus Dalerus Mas…teccius [?]-3-$

Georgius Nathan Augustanus Suevus-3-&

Casparus Bernardus baro de Rechberg de et in Hohen Rechberg-3-$

Joannes Christophorus a Gumppenberg baro in Pettmös-3-#

Ludovicus Eberhardus comes ab Hohenloe et dominus in Langenberg-3-$

Philippus Heinricus comes ab Hohenloe et dominus in Langenberg-3-$

Michael Adolphus Weiler a Künigswisen Bavarus-3-#

Erhardus ab Aw in Feldorff ex Sylva Hercinia-3-$

Christianus Paulus Donzdorffensis Suevus-3-&

Marquardus ab Auu Feldorfensis Suevus-3-&

Philippus Franciscus a Flerscheim-3-*

Nicolaus ab Helffand-3-$

Joannes Bredimus Trevirensis-3-*

Carolus Grundtherr a Weierhaus in Nürnberg-3-#

Rudolphus a Doursperg Monacensis Bavarus-3-#

Ferdinandus ab Haunsperg Bavarus-3-#

Sigismundus Köbl Monacensis Bavarus-3-#

Joannes Widnman Erdingensis Bavarus-3-#

Georgius Christophorus a Thanner-3-*

Heinrich Caroll von der Thann-3-*

Andreas Steeb Martisbachensis Wirtenbergicus-3-$

Georgius Philippus Marschalck de Ostheim-3-#

Lorenzt Lucan ex Rauschenberga Cattorum-3-*

Joannes Carolus Kharll Landishutanus Boius-3-#

Udalricus Schaz Pataviensis, origine Wirtenberga-3-$

Conradus Jäger a Gertzingen-3-$

Wolfgangus Bonackher Uracensis Wurttembergicus-3-$

Carolus a Fraunberg S.R.I. eques hæreditarius-3-#

Maximilianus a Fraunberg S.R.I. eques hæreditarius-3-#

Joannes Joachimus a Leubelfang Bavarus-3-#

Guilielmus a Bubenhoven Leinstettensis-3-$

Georgius Hemel Wurtzburgensis Francus-3-#

Joannes Hengle Bambergensis Francus-3-#

Joannes Ernestus Burggrave electoralis Palatinus-3-*

Joannes Christophorus Wagnerus Augustanus-3-#

Joannes Heinricus Spreter a Kreydenstain, diocoesis Constantiensis-3-$

Joannes Bayler Hechingensis-3-$

Wolffgangus Adamus a Bicken in Haen Rhenensis [?]-3-*

Joannes Christophorus ab Ambshaim in Galgweis et Hoffdorf Boius-3-#

Joachimus Maull (Skaull) Eystadiensis, J.U.L., nobilis de Bicksen gubernator-3-#

Erasmus Coler Fruxini Boiorum natus, physicae cand., nobilis de Ambshaim praeceptor-3-#

Hansz Philip von der Lupfen-3-$

Wolffgang Friederich herr zue Dagspergh-3-*

Friederich herr zue Dagspergh-3-*

Johannes Daniel Waghanerus Trorbacensis-3-*

Joannes Fridericus Blanck Spirensis-3-*

Sebastianus Scheurl Noribergensis-3-#

Paulus Ferenberger Noribergensis-3-#

Joannes Erhardus Echter a Mespelbron, dioecesis Herbipolensis-3-#

Carolus Rudolphus Echter a Mespelbrun, dioecesis Herbipolensis-3-#

Georgius Bocklet Bocklettensis Franco-3-#

Lazarus von Andlaw-3-$

Daniel Osterreicher Augustanus Vindelicus-3-#

Abrahamus Boxbarter Augustanus, medicinae doctor-3-#

Philippus Gantzhorn, anno 1610, Ochsenfurtensis Franco-3-#

Burckhardus Stickel Stuttgardiensis Wirttembergicus-3-$

Joannes Vitus Breitschwerdt Stutgardiensis Wirtembergicus-3-$

Leonhardus Essich Wirtembergicus-3-$

Hans Wilhelm Fuchs vonn Bimbach-3-#

Jobst Henrich Roggenbach-3-#

Georg Heselbach Regiocurianus Francus-3-#

Johannes Sigfridus Clotz Hassus-3-*

Matthæus Petræus Schmalcaldensis Hassus-3-*

Wolfgangus Wilhelmus Wideman Auerbacensis Palatinus-3-*

Johannes a Steinau cognominatus Steinruck Francus-3-#

Philips Caspar von Thuengen Francus-3-#

Leonhardus Angelus Winshemio-Francus P.-3-#

Petrus Wiertz de Confluentia Trevirensis-3-*

Christophorus Brunius Badenvillensis-3-$

Philippus Brunius Badenvillensis-3-$

-3-Allemagne : Palatinat du Rhin, Hesse, le margraviat de Bade, Wurtemberg, Franconie, Souabe, Bavière

Palatinat-Hesse-Sarre-3-*

Bade-Wurtemberg-3-$

Franconie-Bavière-3-#

Souabe-3-&

1611-1620

Christoffel Milchior Weingartz Hessus-3-*

Bernhardus Henricus (*lecture incertaine*) Cuehorn Spirensis-3-*

Joannes a Weda Andernacus Coloniensis-3-*

Johannes Ludovicus Vogt [?]-3-#

Carolus Rechlingerus Augustanas-3-#

Wolfgangus Conradus Wolfing Herbypolensis-3-#

Johannes Benedictus Katzpöckl a Katzenstein, Durnstein et Oberhaussen, natione Suevus-3-&

Wilhelmus Stederus Angelbergensis-3-#

Vuolffgang Friederich Schütz ab Holtzhausen-3-*

Federus Engelhardus Entzweyhingensis in ducatu Wirtembergico-3-$

Tonnies von Bolla [?]-3-&

Lucas Schreccius Noribergensis-3-#

Hieronymus Adelman ab Adelsmansfelden-3-$

Heinricus a Fleckenstein-3-$

Joannes Casparus Delckheimer Moenofrancofurtensis-3-*

Johannnes Casimirus a Schaumberg-3-#

Osvaldus Lenhenrichs Auuensis-3-*

Daniel Neupronner ab Eysenburg et Grunenfort-3-$

Guilhelmus Khuen Marpurgensis Hessus-3-*

Christophorus Waltherus Vormatiensis-3-*

Johannes Jacobus Waltherus Vormatiensis-3-*

Christoph. Calvver [?]-3-$

Simon Irnsinger Noriberg-3-#

Martinus Christianus Gobelius Moguntinus-3-*

Otho Murhardus Fachensis Hassus-3-*

Johannes Wilhelmus Löffelholtz a Kolberg Noricus-3-#

Johannes Jacobus Löffelholtz a Kolberg-3-#

Casparus Agricola Ambergensis Palatinus-3-*

Johannes Andreas Heyell von Wormbs-3-*

Philips de Mimwel cognomine Meichen canonicus des ritterstiftt Bleidenstat-3-*

Magister Stephanus Grun Vormatiensis-3-*

Adamus Leuthius Hachenburgensis-3-*

Johannes Andreas a Guetenberg Franco-3-#

Johannes Godefridus a Guetenberg Franco-3-#

Magister Conradus Schleher Rottenburgensis ad Neccarum-3-$

Johannes Christophorus Truchses a Wetzhusen Franco-3-#

Laurentius a Münster Franco-3-#

Johannes Michael Strausz Hennenbergicus Francus-3-#

Joannes Bernhardus a Sternenfels-3-$

Ludowicus Christophorus a Neipperg-3-$

Johannes Philippus Geuderus ab Herotzberg et Neuhoff-3-#

Ferdinandus comes in Schwarzenbergn, dominus in Hohenlandtsperg-3-#

Carolus comes in Schwarzenbergn, dominus in Hohenlandtsperg-3-#

Christophorus Röttingerus Nordlingensis-3-#

Arnoldus Senheim Confluentinus-3-*

Eberhardus Henricus ab Hoheneck-3-#

Philippus Fridericus Ulner a Diepourg-3-*

Moritz Wilhelm von Corenberg [?]-3-*

Johann Jacob Eichelstein von Zwaybrücken-3-*

Guilhelmus Christophorus de Manspach-3-*

Fridericus m.b. et dominus in Isenberg-3-*

Joannes Conradus Mertzenich Moguntinus-3-*

Joannes Henricus a Mauchenheim dictus Bechtolsheim Palatinus-3-*

Joannes Wendelinus Steinmetz Francofurdianus-3-*

Thomas Ulpianus Hager Constantiensis-3-$

Hanns Albrecht Notthafft von Wernberg aus dem Bayerlandt-3-#

Joannes Waltherus Untz Uberlinganus Suevus-3-&

Georgius Theodoricus Volmar von Bernsshofen-3-$

Johannes Valentinus Schloer Crucenacensis Palatinus-3-*

Philippus Christophorus Burckhardus Heidelbergensis Palatinus-3-*

Joannes Conradus de Gemmingen ex Schwevia-3-&

Georgius Wilhelmus comes Palatinus Neoburgensis-3-*

Fridericus comes Palatinus Neoburgensis-3-*

Georg Wilhelm von Gravenburge [?]-3-*

Friderich von Allenbach-3-*

Melchior Scherl Noribergensis-3-#

Fridericus Lingelshemius Heidelbergensis-3-$

Georgius Lang Noribergensis Francus-3-#

Hieronymus Hagelshaimer dictus Heldt Noribergensis Francus-3-#

Wolff Wilhelm Ramminger Boh.… [?]-3-#

Johannes Murhardus Spangenbergensis Hessus-3-*

Johannes Lenger Cassellanus Hassus-3-*

Wulbrandus de Stockheimb (obiit hic Aureliis 21 decembris anno 1613)-3-*

Hinrich a Stockheimb-3-*

Sebalt Bernhardt a Stockheimb-3-*

Julius Guilielmus Zincgravius Heidelbergensis-3-$

Joannes Guillielmus a Triembach Suevus-3-&

Joannes Gesslerus Erckhausensis Suevus-3-&

Hermannus ab Hundelshausen Hassus-3-*

Joannes Wolffgangus a Dienheim Moguntinus, legum ac medicinae doctor-3-*

Johannes Jacobus Bischoff Constantinus-3-$

Philippus Reinerus Finck Simmerensis Palatinus-3-*

Philippus Ludovicus comes Isenburgicus et Budingæ-3-*

Georgius Fridericus junior comes de Hohenloe et dominus in Langenburgk-3-$

Joannes a Gemmingen Suevus-3-&

Joannes Joachimus a Rusdorff Palatinus-3-*

Otto von Bodenhausen auf Arenstein-3-*

Paullus ab Halleck [?]-3-*

Wolffgangus Adamus Langmantell-3-#

Laurentius Faber Moguntinus-3-*

Eidelius Fridericus comes in Alto Zolleren-3-$

Joannes Guilielmus liber baro de Königsegg et Aalendorff-3-$

Eyttel Hanss von Plieningen-3-$

Fridericus a Plieningen, *identique à* Fridericus a Ploninger, *mort le 1er décembre 1617*-3-$

Joannes Schaz (Rudthausensis) Göppingensis Wirtemberga-3-$

Hanss Wilhelm Tauffel von Puhel-3-$

Hanss Ulrich Ehinger von Baltzheim-3-$

Casparus Speth a Sulsburgh-3-$

Bernhardus Spett a Zwifalten-3-$

Johannes Vitus ab et in Absperg N.F.-3-#

Johannes Casparus ab Herdaw N.F.-3-#

Ephraim Oppenrieder Reinhartshofius Palatinus-3-*

Gerardus Baumbach Cubanus Palatinus-3-*

Bernhardus Junius Onoltzbacensis-3-#

Johannes Heinricus Thenn Augustanus-3-#

Andreas Thenn Augustanus-3-#

Joannes Jacobus Holtzapfell Augustanus-3-#

Jeremias Widholz Augusta-Vindilicus-3-#

Joannes Christophorus ab Otterats Hassus-3-*

Joannes Bayler Hechingensis-3-$

Marquardus Fugger, baro in Kirchperg et Weissenhorn, [*entre* 1614 *et* 1616]-3-#

Marcus Philippus Fugger, baro in Kirchperg et Weissenhorn, [*entre* 1614 *et* 1616]-3-#

Eberhardus a Dienheim-3-*

Georgius Jacobus Reichlin a Meldeckh-3-$

Joannes Jacobus ab Edlinstatten [?]-3-#

Caspar a Stein eques Francus-3-#

Georgius Stephanus a Closen [Suevus]-3-&

Augustus Fridericus a Closen [Suevus]-3-&

Simon Nördlinger Wirttembergico-Suevus-3-&

Frantz Conradt vonn Sickingen-3-*

Hans Schweickardt von Sickingen-3-*

Johannes Bamberger Norimbergensis-3-#

Hansz Ulrich von Wiersperg-3-#

Joannes Christophorus Fuchs in Binbach-3-#

Fridericus Faber Francus-3-#

Johan Christoph Knittell Wormaciensis-3-*

Ludovicus Adolphus Schvartz ex Hassia Niddanus-3-*

Magister Johannes Bruderus Ursellanus-3-*

Franciscus Otto Römer Coubanus-3-*

Hippolytus de Stozingen Suevus in Dellmessingen-3-&

Samuel Sinderus Francofurtensis-3-*

Daniel Forchhundt Baccharacensis-3-*

Wilhelmus Dieffenbach Francofurtensis-3-*

Joannes Fuchsius Ladenburgensis Palatinus-3-*

Joseph Le Pippre Vangio-3-*

Ludovicus Faber Heidelbergensis-3-$

Matthæus Clausius Ulmanus Suevus-3-&

Georgius Hartmannus Kuehorn Spirensis-3-*

Georgius Albertus comes ab Erpach-3-*

Marcus Harff Alceanus Palatinus-3-*

Carolus Caesar Avimont Isenburgicus, J.U.D.-3-*

Severinus Schiller Augustanus-3-#

Johan Erasmus Notthafft von Hohenberg Wirtembergicus-3-$

Johannes Eberhardus Haust ab Ulmen-3-$

Albrecht Weyller von Weyller-3-#

Werner Dietrich von Plieningen-3-$

Joannes Ernestus Im Hoff Augustanus-3-#

Joannes Gaspar Rembold Augustanus-3-#

Philippus Jacobus Im Hoff Augustanus-3-#

Magister Thomas Echerer Bavarus-3-#

Joannes Fridericus Zobell a Gibelstatt Francus-3-#

Joannes Albertus König Moguntinus ex Seligenstat-3-*

Christophorus Jacobus a Waldenfels eques Francus-3-#

Bernolffus de Creilsheim Francus-3-#

Otto a Berlichingen Franco-3-#

Wolff Bernhardt de Crailsheim Francus-3-#

Philippus Ludovicus a Seckendorff Francus-3-#

Jacobus Schütz Tubingensis-3-$

Georgius Marcus Rapoldus Francus-3-#

Georgius Albertus a Seckendorff Francus-3-#

Joannes Albertus a Preising baro de Alto Preising et Steinburg-3-#

Joannes Adolphus Dichll a Duzing-3-#

Joannes Georgius Dellinger Bavarus-3-#

Sebastian Volradt forstmeister von Gelnhausen-3-*

Johannes Georgius Osterreicher Augustanus Vindelicus-3-#

Hanman von Offenburg-3-$

Johann Burckhart vonn Hertigshaussen der jüngere-3-*

Georg Friderich Horneck von Hornburg-3-$

Martinus a Remchingen junior-3-$

Friderich von Eyberg-3-*

Philippus Andreas Frölich Neoburgo-Palatinus-3-*

Guilelmus Buchardus [?]-3-*

Joannes Christoph Nederer Tubingensis Wirtembergicus-3-$

Wolfgangus Theodoricus liber baro in Törring, Stain et Perchtenstain-3-#

Carolus Fugger liber baro in Kirchberg et Weissenhorn-3-#

Leonhardus Widmannus Marckherlbacens Francus-3-#

Georgius Philippus a Rustorff Palatinus Muracensis-3-*

Johannes Mende de Steinfels Palatinus-3-*

Johannes Conradus Mende vom Steinfelsz-3-*

Georg Friderich Krapff von Wormbs-3-*

Jacobus Vett de Monasterio-Steinfelt Treverensis-3-*

Wolffgangus Albertus Rüdt a Bodigkheim et Collenberg-3-#

Valentinus Heinricus Rüdt ab Bodigkheim et Collenberg, eques Francus-3-#

Johannes Glock Ingelfinga-Hoënlohus-3-$

Philippus Bernhardus Landschad von Steinach Palatinus-3-*

Wolffgangus Chuno Landschad von Steinach Palatinus-3-*

Georgius Richter Noribergensis-3-#

Joannes Jacobus a Syrgenstein Suevus-3-&

Joannes Christophorus a Schellenberg Suevus-3-&

Julius Albertus Wolfskeel a Rottenbaur Francus-3-#

Oswald a Fränckhing-3-#

Adamus Philippus a Cronbergk-3-*

Joannes Salentinus Faust de Stromberg-3-*

Joannes Reinhardus Ziegler, Sacrae Theologiae doctor-3-*

Wolff Dietterich Notthafft von und zu Hohenberg-3-#

Wilhelm Christoph Nothafft von und zu Hohenberg-3-#

Paullus Laurentius Lemminger Archipalatinus-3-*

Sebastian von Wellwarth Wirtembergicus-3-$

Georg Khölderer von Höch Wirtembergicus-3-$

Philips Balthasar von Seckendorff Francus-3-#

Georgius Michael Wendelstein Spirensis-3-*

Joannes Wiguleus Hundt de Lautterbach Bavarus-3-#

Joannes Wolfgangus Chnol Boius-3-#

Philippus Ernestus comes Isenburgicus et Budinga-3-*

Johannes Philippus a Busseck dictus Munch Hassus-3-*

Johannes Hermannus Stammius Gleibergensis Nassovius-3-*

Johann Philipp von Gemmingen zu Burg auss landsz Wirdtenberga-3-$

Maximilianus von Glauburg von Franckfort am Main-3-*

Jeronimus Augustus Stralnburger von Franckfort am Main-3-*

Johannes Ernestus Löffelholtz a Kolberg Noribergensis-3-#

Johannes Paulus Loffelholtz a Kolberg Noribergensis-3-#

Johannes Fridericus Jaeger Brackenheimensis Würtembergicus-3-$

Conradus Rab Noribergensis-3-#

Johannes Im Hoff Noribergensis-3-#

Jacobus Fetzerus Noribergensis-3-#

Mattheus Fetzer de Nourenberg-3-#

Johannes Henricus a Köteritz Palatinus Sobernheimensis-3-*

Johannes Fridericus a Closen eques Wirtenbergensis-3-$

Frideric landgrave de Hessen-3-*

Bernhart von Langen auf Oberstaht und Breitenba[c]h gelegen in den graffschaft Hennenberg-3-#

Ulricus Varnbüler Stuttgardia-Wirttembergicus-3-$

Johannes Joachim Pachmair Augusta-Vindelicus-3-#

Daniel Buroner Augustanus-3-#

Hieronymus Buroner Augustanus-3-#

Samuel Buroner Augustanus-3-#

Cunradus Vöhlin Augustanus-3-#

Ludovicus Christophorus a Bettendorff-3-*

Johannes Jacobus Muffel ab Eschenaw et Eckenheidt-3-#

Christophorus Jacobus Muffel-3-#

Hieronymus Holtzmannus Hittinga-Francus-3-#

Johannes Georgius Forstenheuser Neoburgensis ad Istrum Palatinus-3-*

Jacobus Carolus Sacri Romani Imperii dapifer haereditarius baro in Walpurg-3-$

Joannes Jacobus Sacri Romani Imperii dapifer haereditarius baro in Walburg in Zeill-3-$

Fridericus ab Honburg (Homburg) [?]-3-#

Udalricus Kobolt Dr-3-#

Marcus Fugger liber baro in Kirchberg et Weissenhorn, dominus in Welden, etc.-3-#

Franciscus Fugger liber baro in Kirchberg et Weissenhoren, dominus in Welden-3-#

Johannes Heygen Wedanus-3-*

Christophorus Langöttl Monacensis Bavarus-3-#

Henricus Rellinger patricius Augustanus-3-#

Joannes Suicardus Wimpfling Spirensis. Obiit 27 maji anno 1621-3-*

Jacobus Stainheil (Steinheil) Lanspergo-Bavarus-3-#

Joannes Jacobus Holscher Biberbachensis Suevus-3-&

-3-Allemagne : Palatinat du Rhin, Hesse, le margraviat de Bade, Wurtemberg, Franconie, Souabe, Bavière

Palatinat-Hesse-Sarre-3-*

Bade-Wurtemberg-3-$

Franconie-Bavière-3-#

Souabe-3-&

1621-1630

Joannes Fridericus Schneck Ringovia-Kideracus in archiepiscopatu Moguntinensi-3-*

Theophilus Hermannus Matthæus Marpurgensis Hassus-3-*

Joannes Suickardus Hueber Spirensis-3-*

Johannes Paulus Augspurger-3-#

Jonas Osterreicher Augusta-Vindelicus-3-#

Joannes Georgius ab Halweil Constantiensis-3-$

Joannes Melchior Mannlich Augustanus-3-#

Joannes Ulstatt Augustanus-3-#

Joannes Antonius Mannlich Augustanus-3-#

David Ulstatt Augustanus-3-#

Elias Geiselbrunner Augustanus-3-#

Cuno Ordemar a Bodenhausen Hassus-3-*

Albrecht Wilck von Bodenhausen-3-*

Georg landtgraff zu Hessen-3-*

Joannes Conradus Hundtpis a Waltrambs de Schonburg, natione Suevus-3-&

Philippus Jacobus Stromer a Reichenbach Noribergensis-3-#

Wolffgangus Conradus Greckh ab et in Kochendorff-3-$

Joannes Christophorus Wolffskeel Spirensis-Nemetanus-3-*

Joannes Guilhelmus Fabricius in Clesheim Herbipolensis-3-#

Johannes Philippus Weylandt Nasso-Idsteinianus-3-*

Fridericus a Sickinguen Friburgensis Brisgoius-3-$

Joannes a Sickingen Friburgensis Brisgoius-3-$

Joannes Casparus a Stadion Friburgensis Brisgoius-3-$

Joannes Chrysostomus Gästlin Friburgensis Brisgoius-3-$

Antonius Prunus Drechtingshausanus-3-*

Gerardus Wolff Moguntinus-3-*

Maximilianus Wilibaldus S. R. Imp. dapifer hæreditarius, baro in Walpurg-3-$

Joannes Conradus Weigle Möskürchensis (Messkirch ?)-3-$)

Georgius Adamus Han Bambergensis Franco-3-#

Johann Georg Andorffer aus Bayern-3-#

Joannes Philippus a Schönborn Rhenanus-3-*

Philippus Erwinus a Schönborn Rhenanus, fratres-3-*

Fridericus Greiffenclau a Vollratz Rhenanus-3-*

Ambrosius Kolb Gamundinus Francie orientalis-3-#

Landolphus ab Hoheneck Rhenanus-3-*

Matthæus Schmidt Augustanus-3-#

Lotharius Langmesser Confluentinus-3-*

Joannes Georgius liber baro in Königsegg et Aulendorff-3-$

Johannes Christophorus Wick Ulmensis-3-$

Daniel Vitus Neubronnerus Ulmensis-3-$

Joannes Christophorus a Freyberg Suevus-3-&

Georgius Theodoricus Speth a Zwyfalten-3-$

Fridericus Hector a Freyb[er]g in Hinbell (Hurbell ?)-3-$

Joannes Widenman Günzburgensis Suevus-3-&

Lotharius Schneit Confluentino-Rhenanus-3-*

Wilhelmus Christianus Faber Stutgardianus-3-$

Joannes Isaac Synner Andernacensis (huic [jus] immatriculationis remissum)-3-*

Joannes Ferdinandus comes a Schwarzenberg, dominus in Hohenlandsperg-3-#

Wolffgangus Jacobus a Closen, baro in Arnstorff et Gern, etc., frater-3-#

Christophorus Henricus a Closen, baro in Arnstorff et Gern, etc., frater-3-#

Joannes Jacobus a Closen, baro in Arnstorff et Gern, etc., frater-3-#

Guilhelmus Besserer Memmingensis-3-#

Laurentius Henniges Suobaco-Francus-3-#

Balthasar Joachim von Dernbachtal-3-*

Joannes Udalricus Schade de Mittlbiberach-3-$

Gerhardus Adamus Bolzinger Crucenacensis Palatinus-3-*

Jacob Rembolt Augustanus-3-#

Hanss Dietterich Stürtzel von Buchem-3-$

Quirinus Christophorus Küenherr Esluacensis Suevus-3-&

Georgius Öffelein Schwobacensis-3-#

Joannes Melchior Dornneck Appenweyrensis Brisacii Inferioris-3-$

Matthæus Sebastianus Vränll Buchusianus Boius-3-#

Andreas Milsung Geisensis Bucho propre Fuldam (propter paupertatem gratis)-3-*

Magister Ludovicus Hörnicæus P.L. Caes. Darmbstatinus-3-*

Hannss Zweyffellius [?]-3-*

Joannes Georgius Seiter zum Letzen Suevus-3-&

Jacobus Fuggerus liber baro in Kirchberg et Weissenhorn-3-#

Johannes Wernerus Constanciensis Acronianus-3-$

Wernerus Gotfridus Voyt a Rieneck Franco-3-#

Sebulon baro ab et in Fräncking, etc.-3-#

Erasmus Ayrmannus Norimbergensis-3-#

Adam Cronheibl Scherdingensis Bavarus-3-#

Wolfgangus Simon Wilsbeccius Amberga-Palatinus-3-*

Joannes Jacob ab Haunsperg zu Vahenlueg Boius-3-#

Christophorus Ölhafen a Schölnbach Norimbergensis-3-#

Carolus liber baro a Wezesswitz [?]-3-#

Eustathius Swartius Palatinus Neoburgicus-3-*

Johannes Cornett Moenofrancofortanus-3-*

Matthæus Deüring a Mittelweyenburg-3-#

Heinricus, dapifer haereditarius, liber baro de Waltburgk, natione Borussus (Bavière ?)-3-#)

Joannes Rudolphus baro de et in Hohen Rechberg, Suevus ex diocesi Constantiensi-3-&

Bernardus Bero baro de et in Hohen Rechberg, Suevus ex diocesi Constantiensi-3-&

Henricus Alexander baro de et in Hochen Rechberg, Suevus ex diocesi Constantiensi-3-&

Johannes Wolfgangus Adamus Heppenhemio-Palatinus-3-*

Thomas Löffelholtz a Colberg Noricus-3-#

Johannes Christophorus a Schlitz dictus a Gortz-3-*

Zacharias Stenglinus Augusta-Vindelicus-3-#

Jacobus Strasser Oberhusanus Boius, dioeceseos Augustanae, S. T[heologiae] L[ic.]-3-#

Anthonius Schermarius Ulmanus Suevus-3-&

Tobias Neubronnerus Ulmanus Suevus-3-&

Pancratius Hirnbein Amberga-Palatinus-3-*

Guilielmus Högell Ringavianus sub episcopatu Moguntinensi-3-*

Joannes Carolus ab Horben in Ringenberg-3-#

Franciscus Philippus Schoeffer de Moguntia-3-*

Philip Walter von Herrborn Francfurtanus-3-*

Christophorus Linck Norimbergensis-3-#

Ludwig Wilhelm von Streitberg Francus-3-#

Hansz Ludtwig von Schaumberg Francus-3-#

Joannes Fridericus ab Ow-3-$

Joannes Sebastianus zue Rhein-3-*

Joannes Scheyb ex archiepiscopatu Moguntino-3-*

Joannes Jacobus Haug Rottenburgensis ad Nicrum-3-$

Fredericus Worn Trevirensis-3-*

Leo Krafft Ulmensis-3-$

Johannes Philippus Scheibler Gemundensis Hassus-3-*

Joannes Zimmerman Herbipolensis-3-#

Joachimus Klewein Noribergensis-3-#

Fridericus Brugglachen Rheinanus Bavarus-3-#

Johann Gelchsheimer Kittingensis Francus-3-#

Henricus Ferdinandus Vöhlin a Frickhenhausen baro in Yllerthissen et Neoburg-3-#

Joannes Broll Stutgardianus Wirtenbergicus-3-$

Theodorus Schad Ulmensis-3-$

Carol Ludvig Besserer Ulmensis-3-$

Reinhardus Liepolt Moeno-Francofurtensis-3-*

Michael Mayr Schoellangensis Almanganus-3-#

Joannes Udalricus a Pirhing Bavarus-3-#

Gregorius Nidermair von Wörth-3-*

Jacobus Casparus Lerch ab et in Durmstein e gau Reinstrom-3-*

Albert Stamler Ulmanus-3-$

Joannes Conradus Pettenpeckh Bavarus-3-#

Christophorus Erhardus a Westernach-3-#

Carolus Theodoricus ab Ow in Wachendorff-3-$

Johannes Jacobus Hausman Simmeria-Palatinus-3-*

Casparus Simon de Masan Hanovicus-3-*

Joannes Caspar Weissenberger Thünngensis, Constantiensis dioecesis-3-#

Hanns Adam von Bodman Zell-3-$

Martinus ab Heydegg, Constantiensis dioecesis, Waltzhuottensis-3-$

Johannes Georgius Deininger Dilinganus Suevus, procuratoris famulus-3-&

Hanns Benedict Gomerss Würtembergicus-3-$

Joannes Matthias Lauber Kauffbüra-Algoius (20 junii dedit cor. 1. 16)-3-#

Valentinus Heider Lindaviensis Acronius-3-$

Johannes Füll Augusta-Vindelicus-3-#

Fridericus Theodoricus Camerarius de Wormatia dictus a Dalberg, Rhenanus-3-*

Wolffgangus Harttmannus Camerarius de Wormatia dictus a Dalberg, Rhenanus-3-*

Joannes Conradus von der Leyen Treverensi ex agro-3-*

Ernestus Conradus Forstmeister von Gelnhausen Wederavus-3-*

Sebastianus Wilhelmus Mehl Weilmonasteriensis Wederavus-3-*

Joannes Casparus Vogler Spirensis Nemetanus-3-*

Sigismundus Schleicher Ulmensis-3-$

Johannes Zech Lauinganus-3-#

Albert Baldinger Ulmensis-3-$

Sigismundus Baldinger Ulmensis-3-$

Johannes Henricus Schor Rötellanus Marchicus-3-$

Gabriel Oelhafen de Schoelenbach patricius Noribergensis-3-#

Sigismundus Gabriel Holtzschucher de Neuenburg in Thalheim patricius Noribergensis-3-#

Joannes Theodoricus a Freyberg Suevus-3-&

Christophorus Fürer ab Haimendorf patricius Noribergensis-3-#

Jeorge Philippe Harsdörffer patricius Noribergensis-3-#

Joannes Rummel Oxoviensis Francus-3-#

Lucas Henrich Forstmeister von Gelnhausen Wederavus-3-*

Vitus Georgius Holtzschucher Noribergensis patricius-3-#

Johannes Matthias Boltzinger Baccharacensis Palatinus-3-*

Johannes Henricus Patrick Trarbacensis Palatinus-3-*

Franciscus Philippus Mercator Moganus-3-*

Hannsz Friederich von Rothburg zu Reinweiller Costeter bistumb-3-$

Jacob Christoph von Rothburg zu Reinweiller Costeter bistumb-3-$

Joannes Adamus Truchsäs a Wollhausen Nie-Steinenbrunensis ex episcopatu Basiliensi-3-$

Joannes Rudolphus a Prasperg in DanWangen ex episcopatu Constantiensi Brisgoius-3-$

Christianus Reuttin Rheinfeldensis Rauracus, [ex] episcop[atu] Basiliensi-3-$

Philippus Conradus a Liebenstein Suevus-3-&

Hyeronymus Klöpffer Waiblingensis Suevus-3-&

Michael Carolus Arnoldt Bambergenis Franco-3-#

Nicolaus Bulacherus Tubinga-Wirtembergicus-3-$

Sebastianus Boxberger Herbipolensis Franco-3-#

Johannes Klaur zu Wohr Hassus-3-*

Johannes Gotthofredus a Linsing Hassus-3-*

Johannes Fridericus Ehinger Ulmensis-3-$

Matthæus Küchel Ulmensis Suevus-3-&

Johannes Sigismundus Baldingerus Ulmensis Suevus-3-&

Henricus David Stippius Battenburgensis Hassus-3-*

Johannes Georgius Schielz ab Holtzhaussen Wedderavus-3-*

Joannes Casparus Voit a Saltzburg Franco-3-#

Antonius Jacobus Marcus Octavianus Fuggerus, comes de Kirchberg et Weissenhorn-3-#

Franciscus Fuggerus, comes de Kirchberg et Weissenhorn-3-#

Johannes Vitus a Wurtzburgk de Midtwitz Francus-3-#

Ludovicus Berchtolt Neopurgensis Suevus-3-&

Joannes Gaspar Baur ab Eyseneck Franco-3-#

David Welser Augustanus-3-#

Otto Hartmann a Schlitz dictus Görtz, eques Bricheni-3-*

Johan Riedesel zu Eyssenbach Hassus-3-*

Johannes Jacob Vinther Lohra-Marchicus-3-$

Christophorus Cres a Cressenstein patricius Noricus-3-#

Ludovicus Adolphus Krugk Niddanus-3-*

Blasius Kherl Rhorensis Bavarus-3-#

Sebastianus Herpffer, J.U.L., Donawerdanus Suevus-3-&

Johannes Nicolaus Schwebell Stadiera-Palatinus-3-*

Johan Bernhardus Goeler a Ravenspurg-3-$

Dieterich Heuchelin Neoburgo-Palatinus-3-*

Christoph Vittich von der Malsburgk eques Hassus-3-*

Augustinus Nolthenius Hassus-3-*

Nicolaus Widenman Augustanus-3-#

Joannes Sebastianus Merian Augustanus-3-#

Caspar Melchior Fuchs Fuldensis Buccho-3-*

Johan Becken Rot[henburgo]-Francus-3-#

Johan Georg Schill Durlacensis Marchicus-3-$

Antonius Otto a Forstenhausen-3-#

Rabanus de Malspurg Hassus-3-*

Johan Simon Weinman Heilbronnensis-3-$

Johan Jacob Schwindel Stutgardia-Württembergicus-3-$

Ulricus Grundherr a Norimberg P.-3-#

Hannsz Hieronymus Marschalck von Ebnet eques Franco-3-#

Jodocus Seslinus Ulmensis Suevus-3-&

Wolfgangus Christophorus liber baro de Tättenpack-3-#

Jacobus Wernerus ab Ulm in Griessenberg, dyocesis Constantiensis-3-$

Henricus Christophorus ab Ulm in Griessenberg, diocesis Constantiensis-3-$

Casparus Manzius Gundelfinganus Neo-Palatinus, diocesis Augustanæ, J.U.D.-3-#

Franciscus Raphael ab Ulm in Griessenberg-3-$

Wolff Christoph Bödheimer d’Marckelsheim Franco-3-#

Georgius Schöttlin Bemenkirchensis Suevus, dioecesis Constantiensis-3-&

Gabriel Rechlinger patricius Augustanus-3-#

Joannes Müller Deselbacensis Franco-3-#

Joannes Wolffgangus Keltz Franco Munnesbach-3-#

Weipprechtus a Gemmingen nobilis Palatinus-3-*

Georgius Bernhardus Ghöler a Ravenspurg-3-$

Fridericus Göler a Ravenspurg-3-$

Johannes Gabriel Plech [?]-3-#

Johannes Casparus Matthiæ Grunstadianus Vangio-3-*

Wolff von Gemmingen eques Rhenanus-3-*

Johann Sigmund von Gemmingen Craichgoius-3-$

Johannes Bernhardus Michaelis Derdinga-Wurtembergicus-3-$

Anthonius Waltpott a Bassenheim-3-*

Joannes Cammerarius de Wormatia dictus a Dalberg-3-*

Wolffgangus Eberhardus Cammerarius de Wormatia dictus a Dalberg-3-*

Joannes Lotharius Waltpott a Bassenheim-3-*

Ropertus Untzen condictus Ediger (pro tempore moderator dominorum [Dalberg])-3-*

Philippus Ludovicus de Stempier Ratisbonensis Bavarus studiosus juris-3-#

Hans Heinrich Schärtlin von Burtenbach Suevus-3-&

Philippus Christophorus Kanne nobilis Francus-3-#

Christianus von Langen nobilis Francus-3-#

Johannes Henricus Theinlæus Francus-3-#

Franciscus Pemlerus Bavarus Landspergensis-3-#

Philippus Cuno de Helmstatt Greichgovius-3-$

Ignatius Pemler Landspergensis Bavarus-3-#

Johannes Wigandus Schwartz Vilbellensis Hanovicus-3-*

-3-Allemagne : Palatinat du Rhin, Hesse, le margraviat de Bade, Wurtemberg, Franconie, Souabe, Bavière

Palatinat-Hesse-Sarre-3-*

Bade-Wurtemberg-3-$

Franconie-Bavière-3-#

Souabe-3-&

1631-1640

Joannes Wundergast Marpurgensis Hessus-3-*

Georgius Adolphus Schätzl baro de et in Hörmansperg, Waymanstorff et Thyrnen-3-#

Leopoldus Benedictus Schätzl baro de et in Hörmansperg, Waymanstorff et Thyrner-3-#

Balthasar Venator Wingartensis Palatinus-3-*

Joannes a Bodman Suevus eques-3-&

Maximilianus Albertus Schenckh a Stauffenberg Suevus eques-3-&

Nicolaus Baur Constantiensis Acronianus Suevus-3-&

Philippus Fridericus ab Hertingshaussen Hassus-3-*

Eberhardus Wolff ex Hassia Darmbstatinus-3-*

Hans Conrad Bender M[oenum]-Francofurtensis-3-*

Johannes Jacobus Kaibius Weilburgo-Nassovius-3-*

Richardus Molitor Detelbacensis Franco-3-#

Gabriel Harsdörfer patricius Noricus-3-#

Christophorus Andreas Harsdörfer patricius Noricus-3-#

Johannes Christophorus Muller Noribergensis-3-#

Jacobus Grass Confluentinus-3-*

Fridericus Ludovicus ab Ulm ex marchionatu Rötelensi-3-$

Carolus Fridericus de Helmstatt Craichgovius-3-$

Johannes Christophorus Eisen Francus-3-#

Georgius Henricus a Werdenstain, dioecesis Constantiensis-3-$

Joannes Hartmannus a Rosenbach Wetteravus-3-*

Theodoricus Loherz Herbipolensis-3-#

Carolus Pfintzing de Henffenfeldt et Grundlach-3-#

Sebaldus Tucherus patricius Noricus-3-#

Fridericus Casimirus Römer Meysenheimio-Bipontinus-3-*

Matthias Guilielmus Goll Friburgo-Brisgoius, diocoesis Constantiensis-3-$

Joannes Jacobus Waibell Guotemburgensis Hercinius, dioecesis Constantiensis-3-$

Lotharius von Metternich von Schweppenbergh-3-*

Wolffgangus Michael Silbermann Neoburgensis Palatinus ad Istrum-3-*

Johannes Henricus Dauber Herbornensis Nassovius-3-*

Joannes Maximilianus liber baro de Preysing in alten Preysing Bavarus-3-#

Fridericus Christophorus Corbaccensis Waldecus-3-*

Isaac a Neuhausen in Obersulmentingen-3-$

Georgius Ludovicus a Neuhausen in Obersulmentingen-3-$

Philippus Hainzel Constantiensis Acronianus, J.U.L.-3-$

Joannes Henricus Handel Biberacensis Suevus-3-&

Joannes Baptista Balthasar Monacensis Bavarus-3-#

Joannes Swicardus Boos de Waldeck in Montfort-3-*

Joannes Georgius Hansele de Baldeneck-3-*

Frideric comte palatin du Rhin, duc de Bavière-3-#

Johan Ernst von Haubenstein freyherr-3-$

Johan Ehrenreich Beyman freyherr [?]-3-$

Friderich Pawel ex Palatinatu-3-*

Jean Melchior Eichhern de Baumboldre Bipontinus-3-*

Johannes Sebastian Neithart von unndt zu Baustetten-3-$

Ludwig Albrecht Schad von Ulm-3-$

Henricus Fridericus Rast (*ou* Kast Gernspacensis) Hernspacensis-3-$

Joannes Jacobus Kneipff Bero-Castellanus Trevirensis-3-*

Otto Ludovicus comes de Eberstein-3-$

Joannes Georgius Merk (Mech) Waldtkirchensis Brisgoius-3-$

Paulus Georgh Norimbergensis-3-#

Christophorus Wilhelmus Scheurl patricius Norimbergensis-3-#

Georgius Anthonius ab Heppenheim dictus a Saal Wormatiensis-3-*

Johannes Rabus Weissenbronna-Francus-3-#

Johannes Christophorus de Lendersheim Francus-3-#

Georgius Alberti Cæsareo-Lutrensis Palatinus-3-*

Josephus Bachærus Monaco-ad Sylvam Gabrettarum Palatinus-3-#

Jacobus Mechbach Spangenbergensis Hassus-3-*

Elias Coriarius Leuchtenavia-Hassus-3-*

Johann Baptista Böcklin Augustanus-3-#

Christophorus Böcklin Augustanus-3-#

Tobias Böcklin Augustanus-3-#

Philippus Aichelius Augustanus, medicinae doctor-3-#

Melchior Gottschich Norenbergensis, medicinae studiosus (sub titulo paupertatis)-3-#

Joannes Carolus comes a Schönburg et Ferdinandi Secundi consiliarius intimus-3-$

Wolfgangus Fridericus comes de Hohenloe et dominus in Langenberg-3-$

Philippus Godfridus comes de Hohenloe et dominus in Langenberg-3-$

Johan Friderich Pawel von Heydelberg-3-$

Johann Georgius Härlin Göppingensis Württembergicus-3-$

Matthæus Mauchter Ehingensis ad Danubium fluvium-3-$

Lotharius Orth Confluentinus. *Décédé le 5 septembre 1634*-3-*

Christophorus Burckhartus Francus-3-# (gratis cum dominis comitibus de Hohenloe)

Zacharias Hainlein Norimbergensis-3-#

Jean Engelhard Holtzschuer patricius Noricus-3-#

Caspar Glebotius Swinsfurto-Francus-3-#

Joannes Adamus Pfeffer Moguntinus-3-*

Augustinus Thain Swinfurthensis Francus-3-#

Fridericus landgravius Hassiensis-3-*

Jacobus Cseider Lindaviensis Acronius-3-$

Johann Arnoldt de Sickingen de Eberenburg-3-*

Joannes Carolus ab et in Franckenstein Francofurtensis-3-*

Georgius Andreas Majer Weidena-Palatinus-3-*

Georgius Ludovicus comes Nassovicus CattimelibocorumViandae Beilstein-3-*

Comes Fuggerus, *27 aout 1635*-3-#

Hermannus Combachius Marpurgensis Hassus. *Décédé le 25/26 mars 1636*-3-*

Moritz von Hertingshausen Hassus-3-*

Justus Henricus Heidfeld Herborna-Nassovius-3-*

Adolphus comes Rheni et de Sauvage, 29 septembris 1635-3-*

Nicolaus Botzheim condictus Gereon Confluentinus-3-*

Georgius Rotenbeck Noricus-3-#

Joannes Jacobus Gasser Constantiensis Acronianus-3-*

Rudolff Wilhelm Rawe von Holtzhausen-3-*

Johannes Jacobus Starck Noribergensis-3-#

Johann Balthasar Spalter Vilseckcensis Palatinus-3-*

Nicolaus Wolfgangus Goarino-Hassus-3-*

Joachimus Daniel Willer Spirensis-3-*

Franciscus Jacobus Rummetsch Spirensis-3-*

Charles de Nassou, *3 juillet 1637*-3-*

Albertus Christophorus Rösler Francus-3-#

Johan-Hector Brom Moeno-Francofurtanus-3-*

Magnus Fetzer Norinbergensis-3-#

Johan-Philip Kellner Moeno-Francofurtanus-3-*

Christianus Hassiae landgravius, *11 octobre 1637*-3-*

Ernestus Hassiae landgravius, [11 die octobris]-3-*

Christophorus Achatius Hüls Norimbergensis-3-#

Philippus Ludovicus Kellner Moeno-Francofurtanus-3-*

Johann Helwig Sinoldt genandt Schütz Gissa-Hassus-3-*

Johan Christian Fichardt Francofurtensis-3-*

Johannes Fischer von der Hueb Allemannus-3-#

Pancratius Schülden (*ou* Ghüler *ou* Gülden) Heldburgensis Francus-3-#

Johannes Böckh Ulmensis-3-$

Hanss Christoff Wierer von Nuembergh-3-#

Martin Beckh von Ulm-3-$

Jacobus Zeeman Palatino-Neoburgicus-3-*

Alexander Ulricus liber baro de Freyberg-3-#

Hieronymus Wilhelmus Schlusselfeldt patricius Norimbergius-3-#

Vitus Hotzius Werthemia-Franco ephorus Herbersteinius-3-#

Johannes Ludovicus Wild-und Rheingrave, *22 juin 1640*-3-*

Hieronymus Augustus Faust von Aschaffenburg-3-#

Joannes Petrus Senheim Confluentino-Trevirensis-3-*

Menso Alting Heidelbergensis-3-$

Joannes Christophorus a Buobenhofen Brigantinus-3-$

Peter Bilfeldt von Franckfurdt am Main-3-*

Joannes Ignatius ab Aham Boius-3-#

-3-Allemagne : Palatinat du Rhin, Hesse, le margraviat de Bade, Wurtemberg, Franconie, Souabe, Bavière

Palatinat-Hesse-Sarre-3-*

Bade-Wurtemberg-3-$

Franconie-Bavière-3-#

Souabe-3-&

1641-1650

Joannes Wiguleus de Paumgartten Bavarus-3-#

Philippus Jacobus Buschius Hailbrunnensis-3-$

Jacobus Fridericus Kühorn Spirensis-3-*

Johan Christoph Cab(von Alsagehn ?)-3-*

Conradus Fridericus Kötzner Herbipolensis Franco-3-#

Philippus Freherus Norimbergensis-3-#

Joannes Reichraht von Merll Treverensis-3-*

Nicolaus Martinus Drach vonn Oppenheimb-3-*

Johann Esajas Fabricius Fridbergensis Wetteranus-3-*

Leonhardus Oswaldus Putz Norinbergensis-3-#

Johannes Theodorus Lauuenberg Confluentinus-3-*

Joannes Christophorus liber baro de Preysing-3-#

Johann Reinhardt Schupp Gissa-Hassus-3-*

Laurentius Clas Bavarus Wasserburgensis-3-#

Jean comte de Waldeck et Piermont baron de Tonna-3-*

Joannes Georgius Kieffer Friburgensis Brisgoius-3-$

Jacobus Jungman oriundus ex Corbachio Gualdecca habitans Cassellis Hessorum-3-*

Ernestus Christophorus Schaffalitzky de Muckendell-3-$

Jesaias Romplerus de Loewenhalt Germanus-3-#

Christianus Augustus a Breitenstein-3-#

Johannes Ludovicus a Breitenstein-3-#

Johannes Augustus comes Solmensis-3-*

Johannes Fridericus comes Solmensis-3-*

Philippus Christianus Fichardt Franckfurt am Main-3-*

Hanns Hector Fichardt Franckfurt am Main-3-*

Matthæus Widenmann Ulmensis-3-$

Justinus Herdesianus Noribergensis-3-#

Johannes Georgius Meurers Breisgauensis-3-$

Johannes Guilhelmus Stadler Landaviensis-3-*

Johann Caspar de Döringuenberg in Hirtzbergk Hassus-3-*

Johannes Jacobus Haller Noribergensis-3-#

Philippus Jacobus Tetzel Noribergensis-3-#

Ferdinandus Maximilianus baro de Weix [Bavarus]-3-#

Guilielmus Imhoff Noribergensis-3-#

Laurentius Steib Möskirchensis-3-$

Jean Caspar Fahr Cassell-3-*

Anthon Ram Mengringhusano-Waldeccus-3-*

Guilielmus Jacobus Rinck a Baldenstein Friburgensis Brisgoiae-3-$

Georgius Jacobus Pömer patricius Noribergensis-3-#

Hannss Wollff von Oberkirch-3-$

Samuel von Oberkirch-3-$

Jannes Frederich Rooen von Stuckgart Wirtenbergensis-3-$

Johannes Melchior von Oeynhausen eques Hassus-3-*

Rab Arndt von Oyenhausen-3-*

Crafft Adam von Busseck genand Mönch Hassus-3-*

Damian Hartardt von der Leyen de Adendorff-3-*

Joannes Michael von der Leyen d’Adendorff-3-*

Nicolaus Becker (Boeker) Wesaliensis Trevirus-3-*

Ignatius Widnman Bavarus-3-#

Georgius Christophorus Poemer patritius Noribergensis-3-#

Georgius Daniel Patrich von Trarbach ahn Mosell-3-*

Johannes Georgius Teufel Heilbronnensis-3-$

Hermannus Riedesell in Eysenbach eques Hassus-3-*

Paris de Werder [Hassus]-3-*

Johann Georg Paur (Baur) ab Haittenkaim Bavarus-3-#

Joannes comes de Montfort-3-$

Franciscus comes de Montfort-3-$

Georgius Eberle Constantiensis-3-$

Christophorus dapifer haereditarius, comes in Trauchburg (Trux ?), dominus de Walpurg-3-$

Ernestus S.R.I. dapifer haereditarius, comes in Trauchbourg, etc.-3-$

Joannes Casparus Soler Offenburgensis-3-$

Lotharius Breton Confluentinus, dioecesis Treverensis-3-*

Joannes Eberhardus Zehener Confluentinus, dioecesis Trevirensis-3-*

Andreas Kopffius Hanoviensis-3-*

Johann-Philippus Weisselius Hanoviensis-3-*

Philippus Christophorus Anethan Trevirensis-3-*

Johann Ludwig graff zu Leiningen unndt Rixingen, herr zu Westerburg-3-*

Johannes Adamus Serfridt Nordlingensis-3-#

Joannes Michael Sonner Elzachensis Brisgoius-3-$

Joannes Antonius Peller Suevus-3-&

M. Joannes Jacobus Senfflin Ehinganus ad Danubium Suevus, J.U. cand.-3-&

Joannes Henricus Gebsatdell Franco-3-#

Adolphus Joannes comes Pal. Rheni …. -3-*

Daniel Besserer Noribergensis-3-#

Joannes Nicolaus Becht Francofurtensis-3-*

Franciscus Weingärtner Trorbacensis-3-*

Franciscus Christophorus comes a Furstenberg-3-$

Frobenius Maria comes a Furstenberg-3-$

Joannes Fischer Allemannus [?]-3-$

Jacobus Carolus Ifflinger de Grannegg-3-$

Joannes Vratislaus Lemp Friburgensis-Brisgoius-3-$

Laurentius Steib Suevus-3-&

Fridericus Christophorus Langell Passaviensis-3-#

Henricus Martinus Bayer Noricus-3-#

Georgius Stephanus Bayer Noricus-3-#

Joannes Rudolphus Schultheis Herbipolensis Franco-3-#

Joannes Wendelinus Nebell Bingensis-3-*

Franciscus Martinus Menshengen Moguntinus-3-*

Paulus Ruefus Norimbergensis-3-#

Joannes Georgius Burckhard Franco-Herbipolensis-3-#

Eustache baron de Heydeck-3-#

Johannes Baptista Im Hoff Norimbergensis-3-#

Hartmannus Manz Wormatia-Vangio-3-*

Adamus Rudolphus Schisselfelten Norimbergensis-3-#

Johannes Christophorus Tucher patricius Norimbergensis-3-#

Tobias Tucher ab Oberndorff Norimbergensis-3-#

Martinus Pfinzing ab Henfenfelt p[atricius] Noricus-3-#

Stephan Tucher Noribergensis-3-#

Joannes Rudolphus Ripp (Rapp) Ladenburgensis, dioecesis Wormatiensis-3-*

Hermannus Andreas Lasser Vangio-3-*

Joannes Joachimus Schull Herbipolensis Franco-3-#

Joannes Ulricus Vidholz Augustanus-3-#

Johannes Jacobus Schae (Schaden) Ulma-Suevus-3-&

Johannes Valentinus Barthel Herbipolensis-3-#

Nicolaus Heyrling Brisacensis Brisgoius-3-$

Abrahamus Freinshemius Vormatiensis Vangio-3-*

Johannes Georgius Baldinger Ulmensis-3-$

-3-Allemagne : Palatinat du Rhin, Hesse, le margraviat de Bade, Wurtemberg, Franconie, Souabe, Bavière

Palatinat-Hesse-Sarre-3-*

Bade-Wurtemberg-3-$

Franconie-Bavière-3-#

Souabe-3-&

1651-1660

Joannes Jacobus Leiner Constantiensis-3-$

Johannes Gulielmus de Fortenbach in Reichenschwandt-3-#

Augustus Fridericus Mockelius Hallensis-3-$

Christophorus Jacobus Mockhelius Hallensis-3-$

Albert Stamler p[atricius] Ulmicus-3-$

Justus Philippus Steinmetz Moguntinus-3-*

M. Sebastianus Glumper Silesio-Hennenbergia-Francus-3-#

Abrahamus Ludovicus de Gulchen Spira Nemes.-3-*

Gothofredus Reichmannus Dillaeburgo-Nassovicus-3-*

Johannes Hieronymus Stalburger Moenofrancofurtensis-3-*

Philippus Ludovicus Stalburger Moenofrancofurtensis-3-*

Comes Waldec, die 17/23 junii 1654-3-*

Fridericus Nicolaus de Lendersheim eques Francus-3-#

Joannes Georgius Specht de Bubenheim eques Rhenanus-3-*

Anselmus Franciscus Fridericus ab et in Ingelheim eques Rhenanus-3-*

Philippus Ludovicus Arbogast ex dioecesi Moguntinensi civitate Aschaffenburgensi-3-#

Wilhelmus Finckler Norimbergensis-3-#

Ulricus Wilhelmus Braitschwerdt Stutcardia-Wirtenbergicus-3-$

Wolffgangus Ebhard Neoburgo-Palatinus-3-*

Henricus Ludovicus Lersner Moeno-Francofurtensis-3-*

Achilles Augustus ab Hynsberg Moeno-Francofurtensis-3-*

Johannes Jacobus Schegkius Weissenberga-Noricus-3-#

Joannes Georgius Lasser liber baro de Martzoll-3-#

Johannes Noé Dufay Francofurtensis ad Moenum-3-*

Joannes a Bibra in Irmelshausen Francus-3-#

Georgius Pancratius Stieber de Buttenheimb Francus-3-#

Michael Haberman aus Hessen von Waltcappel-3-*

Johannes Georgius Geier Ratisponensis, U.J.L., liberi baronis Leysseri [Austrii] ephorus-3-#

Ernestus Guilielmus Ways Hersfeldensis Hassus-3-*

Johannes Augustinus Schreiber Augustanus-3-#

Ernestus Henricus a Lendersheim eques Francus-3-#

Matthias Ediger Treviris-3-*

Johannes Christophorus ab Eyb (Eyff) nobilis Francus-3-#

Joannes Ludovicus Joannis Fuldensis Buccho-3-*

Joannes Christophorus Wilhelmus Ganzhorn Herbipolensis-3-#

Johannes Jacob Fischer Francfort-3-*

Georgius Tobias Ölhafen de Schöllnbach Noribergensis-3-#

Johannes comes Sylvarum et Rheni-3-*

Sigismundus Jacobus Holtzschuber a Neuburg Noribergensis-3-#

Johannes Melchior Haller ab Hallerstein Noribergensis-3-#

Georg Burckard Löffelholtz de Kolberg-3-#

Crato Ludovicus comes Ottingensis-3-#

Albertus Ernestus comes Ottingensis-3-#

Conradus Guilielmus a Werdnaw nobilis Suevus-3-&

Godefridus Maximilianus a Werdnaw nobilis Suevus-3-&

Joannes Ignatius a Deyring Bavarus-3-#

Johannes Matthæus de Deuring Su(ev)us-3-&

Lotharius Ferdinandus baro de Leyen de Trevis.-3-*

Johannes Fridericus dux Wirttenbergensis-3-$

Maximilianus Ludovicus comes de Lodron Bavarus-3-#

Carolus Velser patricius Augustanus et Noribergensis-3-#

Carolus Gottlieb Furer patricius Norimbergensis-3-#

Wolff Carl Harsdorffer patricius Norinbergensis-3-#

Johannes Adamus Umbscheiden Trevirensis-3-*

Fridericus comes de Nassau Saraepontanus-3-*

Sigismundus Josephus liber baro ab et in Spangstein p[atricius] Norimberg-3-#

Philippus Melchior de Steincallenfels eques Rh[enanus]-3-*

Christian Carol von Giech eques Francus-3-#

Georgius Fabricius Norimbergensis-3-#

Georgius Carolus Muffel patricius Norinbergensis-3-#

Wolff Friderich Pömer Nurenbergensis-3-#

Godofredus ab Holz Wirtembergicus-3-$

Johannes Jacob Demont Gochsheima-Kreichgovicus-3-$

Johann Jacob Kerscher Ratisbonensis-3-#

Albertus Ludovicus ab Eyb n[obilis] Franco-3-#

Johannes Antonius Pottgiesser Confluentinus-3-*

Daniel Welser patricius Augustanus-3-#

Johannes Martin Seubertus Durlaco-Marchicus-3-$

Steffan des Roussieaux de Franconye natif de la ville de Hannau-3-*

Jean Chrestien Friedell de Coburg-3-#

Johannes Jacobus Heririer Gochsheima-Greichgovius-3-$

-3-Allemagne : Palatinat du Rhin, Hesse, le margraviat de Bade, Wurtemberg, Franconie, Souabe, Bavière

Palatinat-Hesse-Sarre-3-*

Bade-Wurtemberg-3-$

Franconie-Bavière-3-#

Souabe-3-&

1661-1670

Melchior Godefridus Fabritius a Clesheim Episcopius Franco-3-#

Philippus Guilielmus Högell Alzeanus-3-*

Wolffgangus Jacobus Ungelter Suevus-3-&

Magnus Dither de Thumenberg von Nurnberg-3-#.

Joannes Nicolaus Miller Neoburgensis ad Danubum-3-#

Joannes Jacobus Wernisius Offenburgensis-3-$

Richard de Bechtolsheim Bucho-3-*

Joannes Bartholomaeus Keller Franco-3-#

Wolff Dauberperger von Munchen aus Bayeren-3-#

Johann Gerlach Varnbuler von Hemmingen nobilis Suevus-3-&

Johann Eberhard Varnbuler von Hemmingen nobilis Suevus-3-&

Matthias Koch a Gailenbach et Schönleuthen eques Suevus-3-&

Marc Baldinguer Ulmensis-3-$

Emanuel Mörtzer Moguntinus-3-*

Voit Engelhard Holtzschuber von Neubourg Noribergensis-3-#

Georg Theodoricus Möller Spirensis-3-*

Joannes Franciscus Lang Wembdinganus Noricus-3-#

Johannes Philippus ab Holtzhausen Francofurtensis (*lecture difficile*)-3-*

Johannes Georg ab Holtzhausen Francofurtensis-3-*

Johannes Martinus a Birghden Francofurtensis-3-*

Wilhelmus Christianus a Geismar Hassus-3-*

Franciscus Benno liber baro de Lerchenfeldt-3-#

Maximilianus Theodericus liber baro de Lerchenfeldt-3-#

Joannes Carolus a Werdenstein Buechlensis-3-#

Johann Friderich de Geismar Hassus-3-*

Johannes Joachimus Krannost Ratisponensis-3-#

Johannes Michael de la maison Billy Bavarus-3-#

Philippus Christophorus a Merll Confluentinus-3-*

Joannes Joachimus Freyman de Randegg Boius-3-#

Joannes Jacobus Imhoff Augustanus-3-#

Fridericus Philippus a Franckenstein Wetteravus-3-*

Joannes Ludovicus a Franckenstein Wetteravus-3-*

Hieronymus Sartorius Ursellanus-3-*

Magnus Fetzer Norimbergensis-3-#

Joannes Schaumberg Spirensis-3-*

Wilhelmus Loefenius de Heimbhoff Amberga-Palatinus-3-*

Johannes Henricus ab Hynsberg Moeno-Francofurtensis-3-*

Ludovicus Jacobus Gambs Hassus-3-*

Johannes Christophorus Harsdorfer Norimbergensis-3-#

Johannes Philippus ab Adelsheim eques Francus-3-#

Fridericus a Weyler eques Francus-3-#

Joannes Friess Meyensis diocoesis Trevirensis-3-*

Joannes Richardus Enbauen Lincensis ad Rhenum-3-*

Fridericus Kneipf Berncastellano-Trevirensis-3-*

Wolphgangus Joachimus Weingärtler ab Haibach et Oberbach, Bavarus-3-#

Mathias Esch Confluentinus ex patria Treverensi-3-*

Franciscus Damianus Wilhelmus de Bourscheidt de Bourgbroll-3-*

Joannes Petrus Finger Confluentinus, diocoesis Trevirensis-3-*

Philippus Ludovicus Pistori Wormatiensis-3-*

Cornelius François Cramprie Confluentinus-3-*

Joannes Antonius Pfraumbaum de Bingen-3-*

Johannes Wolfgangus Schultheis dictus Ghering Svinfortensis Franco-3-#

Philips Reinhardus Krottendorffer Roettela Marchicus-3-$

Lotharius Otto Schabart Witlichius, diocoesis Trevirensis-3-*

Joannes Gotthardus Vohlin baro in Illerthussen-3-#

Joannes Jacobus de Turnhoven Turkheimensis-3-#

Joannes Brandt Confluentinus-3-*

Dominus Bonifacius de Dancketschweil ducati Monasterii Campidonensis professus-3-#

Jean Godard Vohlin baron de Frikenhausen-3-#

Franciscus Ferdinandus comes a Wartenberg Bavarus-3-#

Georgius Fridericus liber baro de Bissingen dominus in Grunzheim Brisgoius-3-$

Franciscus Antonius liber baro de Freyberg et Eisenberg dominus in Wellendingen Suevus-3-&

Joannes Bonaventura Victor liber baro ab Aham Bavarus. *Décédé à Orléans le 18 juillet 1671*-3-#

Guilielmus Franciscus liber baro de Spiring ex Palatinatu Neoburgico-3-*

Georgius Fridericus Faber Stutgarda-Wurtembergicus-3-$

Henricus Abrahamus Faber Stutgarda-Wurttembergicus-3-$

Christophorus Kramer Lauingensis-3-#

-3-Allemagne : Palatinat du Rhin, Hesse, le margraviat de Bade, Wurtemberg, Franconie, Souabe, Bavière

Palatinat-Hesse-Sarre-3-*

Bade-Wurtemberg-3-$

Franconie-Bavière-3-#

Souabe-3-&

1671-1680

Franciscus Gallus liber baro de Lichtenberg, Noribergensis domic., nati[one] Carnius-3-#

Guilielmus Barchaus Moeno-Francofurtanus-3-*

Joannes Andreas Scheidling Augusta-Vindelicus-3-#

Fridericus Magnus comes de Solms-3-*

Georgius Adamus Brimm S. Fr. [?]-3-#

Johannes Adrianus Khiay Landishutanus Boius-3-#

Renno Antonius Oberndorffen de Ratisbona-3-#

Johannes Henricus Lilius Cassellanus Hassus-3-*

Joannes David liber baro Deittenhofen-3-#

Johan Caspar Enboven (Embhaven) Lincensis ad Rhenum-3-*

Carolus Paulus Zimmerman Lintzensis ad Rhenum-3-*

Joannes Wilhelmus comes Palatinus Rheni, principis Philippi Wilhelmi filius-3-*

Johannes Albert Senff de Soulebourg [?]-3-*

Pierre Matthef de Norimberg-3-#

Albertus Balthasarus Guggemos [nobilis] Bavarus-3-#

Henricus Anthon Speirmann Corbachio-Waldecius-3-*

Martinus Henricus Senheim Treviro-Confluentinus-3-*

Joannes Theodoricus Harder de Constance-3-$

Johannes Martinus Schubbart Norimbergensis-3-#

Johannes David Motz Catto-Cassellanus-3-*

Nicolaus Haxthausen Catto-Cassellanus-3-*

Ernestus Ferdinandus de Haannou Bavarus, med. doctor-3-#

Johannes Maximilianus Ferdinandus Felix comes de Preysing-3-#

Johannes Wolfgangus Faber Boius Rosenhemensis-3-#

Justus Hermannus Vulteius Cassel-3-*

Petrus Christianus Campius Moguntinus-3-*

Adolphus Oppenheimer Moguntinus-3-*

Johan Henrich Kleinschmid Marburgensis Hessus-3-*

Johan Friederich Sultan d’Eichzell-3-*

Conrad Franz Steinhausen Spirensis-3-*

Frans Conrad de Lützow Palatinus-3-*

Georgius Heinricus a Boyneburgch Franconus-3-#

Jean Andre Geist de Wildegg Suevus-3-&

Johannes Philippus Orth Francofortiensis-3-*

Philipp Bernard baro de Pölnitz-3-#

Damianus Everlinus Treviris-3-*

Georgius Christianus Burckardus a Milchling-3-*

Leopoldus Plappert Wormatiensis-3-*

Joannes Fridericus Champagner Treverensis sive Confluentinus-3-*

Antonius Hugo Durach Algoius-3-#

Joannes Georgius Dourac Immenstattensis-3-#

-3-Allemagne : Palatinat du Rhin, Hesse, le margraviat de Bade, Wurtemberg, Franconie, Souabe, Bavière

Palatinat-Hesse-Sarre-3-*

Bade-Wurtemberg-3-$

Franconie-Bavière-3-#

Souabe-3-&

1681-1689

Johannes Christophorus comes in Zeyll, liber baro de Waldburg-3-$

Sigismundus Ludovicus Wurffbain Noribergensis Franco,, comitis in Zeyll consiliarius-3-#

Ferdinandus Josephus Joannes de Westernach Cronburgensis, Suevus-3-&

Maximilianus Rudolphus de Westernach Cronburgensis Suevus-3-&

Joannes Franciscus baron de Knœring Franco-3-#

Joannes Martinus baron de Knœring Franco-3-#

Johannes Fridericus Becht Esslingensis-3-$

Jacques Joseph de Saint-Vincent Suevus-3-&

Johannes Albertus Schenckh de Stauffenberg Suevus-3-&

Philippus Raymundus Remboldt de Augsburg Suevus-3-&

Johannes Bonaventura de Bodeck Francofurtensis-3-*

Franciscus Daniel Pastorius, J.U.L., Winsheimensis-3-#

Franciscus Quirinus de Widman praenobilis Bavarus-3-#

Christophorus Guilielmus Casparus de Widman praenobilis Bavarus-3-#

Wolfgangus Wigulæus Ignatius de Widman praenobilis Bavarus-3-#

Peter Zimmerman Lintzensis ad Rhenum-3-*

Godefridus Reymundus a Mulfing Wurzburgensis-3-#

Joannes Jacobus Planer a Plan Suevus-3-&

Hermannus Andreas Dominicus Hohfeldt Mogonus-3-*

Franciscus Guggemos nobilis Bavarus-3-#

Johann Leopold de Geyso Hass[us]-3-*

Gabriel Ignatius de Bruyn a Blankenfortt nobilis Spirensis-3-*

Carolus Casparus Mullenarck Trevirensis-3-*

Carolus Casparus a Metzenhausen Trevirensis-3-*

Christophorus Enckrich Trevirensis-3-*

Philippus Ludovicus de Rosenbach Herbipolensis-3-#

Joannes Hartmannus de Rosenbach Herbipolensis-3-#

Joannes Ludovicus Otto Homburgensis Franco-3-#

Johannes Jacobus Pasor Herborna-Nassovius-3-*

Johannes Justus Faber Moeno-Francofurtanus-3-*

Damianus Hartardus Cardon Trevirensis-3-*

Joannes Georgius Loutz Confluentinus-3-*

Johannes Reinhardus Croug de Nidda Hassus-3-*

Matthaeus Meurers ex Breisig-3-$

Philippus Franciscus Du Mont Trevirensis-3-*

Joannes Jacobus Albrecht Spirensis-3-*

Joannes Adamus de Hörnigk Moguntinus-3-*

Franciscus Ferdinandt Bavarus-3-#

Wilhelmus Anthonius Flöckher Lintzensis Coloniensis-3-*

Fridericus Joannes Georgius de Sickingen Friburgensis Brisgoius-3-$

Franciscus Petrus de Sickingen Friburgensis-3-$

Henricus Christophorus de Liebenfels Constantiensis-3-$

Josephus Antonius Koler Constantiensis-3-$

Wilhelmus Ulricus Schilling de Canstatt Suevus-3-&

Fridericus Ludovicus ab Eyb eques Suevicus-3-&

Georgius Guilhelmus Goldtbach de Wangen Algoius-3-$

Joannes Georgius Goldtbach de Wangen Algoius-3-$

Joannes Wolfgangus a Zech a Deibach-3-#

-3-Allemagne : Palatinat du Rhin, Hesse, le margraviat de Bade, Wurtemberg, Franconie, Souabe, Bavière

Palatinat-Hesse-Sarre-3-*

Bade-Wurtemberg-3-$

Franconie-Bavière-3-#

Souabe-3-&

1721-1781

Johannes comes de Sponheim ex Wetteravia-3-*

Vilhelmus comes de Sponheim ex Wetteravia-3-*

Ludovicus Ignatius Joannes Conradus liber baro de Zobel de Gibelstatt, Herbipol. canonicus-3-#

Joannes Theophilus Litter Moguntinus natus in Spiciosa Valle-3-*

Joannes Philippus Carolus Josephus liber baro de et a Bibra de la Franconie-3-#

Jeann Fredric Antoin Valentin baro de Zobel de Gibelstatt du diocèse de Franconie-3-#

Fridericus Carolus liber baro Karg de Bebenburg diocesis Bambergensis-3-#

Fridericus Ferdinandus comes de La Leyen-3-*

-4-Autriche, Italie, Hongrie, Tchéquie, Slovénie

Autriche-4-*

Bohême-Moldavie-4-#

Hongrie-4-=

Carniole-Trentin-4-+

1602-1610

Georgius Federll in Tribbes Winckll-4-*

Tobias Kirchmair Austriacus-4-*

Jaroslaus Burggravius, liber baro de Dona (Dhona **ou** Dohna)-4-#

Maximilian Fraidt von Sankt Veit auss Kerndten-4-*

Ferdinandus Huetstokhen a Felbn in Dobra, Austriacus-4-*

Ferdinandus Seyda Tyrolensis Oenipontanus-4-*

Christofforus Bersligrohatecz, domini procuratoris homo-4-#

Wilhelmus Wek Witha a Zerzawehe eques Bohemus, domini procuratoris homo-4-#

Wolffgangus baro a Gera dominus in Arnfels-4-*

Erasmus baro a Gera in Arnfels-4-*

Michael Stubenfoll Viennensis Austrius-4-*

Urbanus Stubenfoll Viennensis Austrius-4-*

Ferdinandus Welzer Styrus-4-*

Gothardus Tattenpeckh Styrus-4-*

Joannes Hieronymus König Pragensis Boemus-4-#

Fridericus Rechlinger in Goldnstain Salisburgensis-4-*

Georgius Weltzer in Sicharz et Greizenstetten Austriacus-4-*

Christophorus Weltzer in Sicharz et Greitzenstetten Austriacus-4-*

Stephanus Feirtag Salisburgensis-4-*

Wolfgangus Pirchaimer a Pirchenau Viennensis-4-*

David Pantaleon Labacensis Carniolanus-4-+

Joannes Freyhammer a Gmunden Austriacus-4-*

Sigismundus Matthias Vvenczelyk baro a Salabit in Triescht [?]-4-+

Elias Schuantz Brunensis Moravus-4-#

Jacobus Reiman Iglaviensis Moravus-4-#

Wencelaus Morkowsky a Zzastrizl liber baro de Maravi-4-#

Jan Abrahamus de Salhausen Bohemus-4-#

Georgius Zapler Salisburgensis-4-*

Antonius Jacobus a Kiepach in Riedt-4-+

Paulus Albertus Michna (Muchna) a Waczinova Budinensis Boëmus-4-#

Richardus Guilhelmus baro a Zelking-4-*

Johannes Joachimus Aschpan ab Haag liber baro-4-*

Johannes Georgius Ernstingerus Oenipontanus Tirolensis-4-*

Johannes Liechtenhamer Austriacus Sirningensis-4-*

Joannes Henricus a Stainpach Boemus-4-#

Joannes Theobaldus Meyer a Baumgarten Saccipolitanus [?]-4-*

Albrecht Kaplir von Sulewicz römischer kayserlicher Mayisteit truchsess in Orbeniz-4-#

Joannes Christophorus Clanner a Clann (*ou* Thanner a Than) Tirolensis-4-*

Joannes Paulus Flusshard a Pottendorff Austrius-4-*

Hanss Peter Sasnna herr von Sasnnowa Austri[us]-4-*

Zdenko baro a Kolobratt-4-#

Christophorus liber baro a Rappach, dominus in Brun-4-#

Daniel Fabinus Epperiensis Pannonius-4-=

Otto Hohenfelder in Aistersheimb Austriacus-4-*

Christophorus Hohenfelder in Aistershaim, Almegk et Peubuch-4-*

Georgius Christophorus baro in Losenstain-4-*

Georgius Achatius liber baro in Polheim-4-*

Georgius Schütter in Clingenberg Austrius-4-*

Laurentius Kæstelius Schoenfeldius prope Bojemos [?]-4-#

Rudigerus baro a Starhemberg-4-*

Paulus Jacobus dominus a Starhemberg-4-*

Matthias Wolzogen Viennensis Austriacus-4-*

Paulus Hanrich a Franckensstain Boemus-4-#

Wratislaus Henricus a Franckensstain Bohemus-4-#

Carolus Fuert Austriacus-4-*

Erasmus Wagn a Wagensperg Styrus-4-*

Felicianus Gäller in Schwanberg Styrensis-4-*

Georgius Christianus baro a Zinzendorff, dominus in Hausegg in Austria-4-*

Johannes Fridericus a Zinzendorff-4-*

Maximilianus Breiner baro in Stibing, Fladniz et Rabenstein-4-*

Georgius Carolus Tanner a Tann-4-*

Joannes Rudolphus Tanner a Tann-4-*

Matthias Zalkowius a Zalkowicz Moravus-4-#

Zdenek Zalkowius a Zalkowicz Moravus-4-#

Johannes Pressius Elysso-Marcomannus-4-#

Sebastian Althaimer Salisburgensis-4-*

Gotthardus liber baro ab Herberstain, Neuperg et Guettenhaag, Lancowiz-4-*

Joannes Paulus Wolzogen in Neuhaus-4-*

Fridericus Crellius Austrius-4-*

Joannes Gruenboerius Austrius-4-*

Elias Lackner Viennensis Austrius-4-*

Joannes Tucher a Schoberau Bohemus-4-#

Johannes Jacobus liber baro in Herberstein-4-*

Wolffgangus Christophorus Volckra Austrius-4-*

Sigismundus Jacobus Bittner Austrius-4-*

Christophorus Andreas Praunfalckh a Neuhaus et Weyer-4-*

Nicolaus Berchtoltdus de Saxengang Austriacus-4-*

Martinus Saller Claudiopolitanus ex Transilvania-4-=

Augustus von Syntzendorff-4-*

Ivo von Syntzendorff-4-*

Maximilian von Syntzendorff-4-*

Christoff Wilhelm Strutz-4-*

Johannes Baptista Strutz-4-*

Johannes Carolus Stockhamer Graezensis-4-*

Carolus Losek a Zampach Boëmus-4-#

Julius Neidhardus liber baro in Mersberg et Beffort dominus Arenfels-4-*

Erhardus Fridericus liber baro in Mersberg et Beffort-4-*

Sigismundus Helfridt a Spitzwel Austriacus-4-*

Erasmus Hirschberger von Königeshain Bohemus-4-#

George von Elsnitz aus Bohemia-4-#

Georgius baro de Thurn in Neuenpeuren et Auu, pincerna-4-*

Erasmus Ferdinandus liber baro a Kolonitsch-4-=

Georgius Gabriel liber baro a Kolonitsch-4-=

Georgius Leopoldus liber baro in Stadl-4-*

Matthias Janus Styrensis Austrius-4-*

Balthasar Kesselboden Carinthus-4-*

Stephanus Wisker Styrus-4-*

Johannes Fridericus a Freyberg in Redeben Carinthus-4-*

Otto Henricus liber baro in Herberstain-4-*

Vitus Sigismundus liber baro in Herberstain-4-*

Georgius Sigismundus liber baro in Herberstain-4-*

-4-Autriche, Italie, Hongrie, Tchéquie, Slovénie

Autriche-4-*

Bohême-Moldavie-4-#

Hongrie-4-=

Carniole-Trentin-4-+

1611-1620

Wolffgangus liber baro ab Ödt in Goetzendorf [*entre* 1611 *et* 1612]-4-*

Florianus Georgius a Griespach Bohemius-4-#

Constantinus Bautschner de Schlegenberg Moravus-4-#

Georgius Christophorus Hack Austrius-4-*

Wolffgangus Andreas Händl Viennensis-4-*

Georg Friderich Sugereditsch von Agram (Zagreb)-4-=*

Foelix Had a Prosecte Pragenus-4-#

Guillaume Adalbert Dampovais (*ou* Rampovais) de Dampova, etc. [?]-4-#

Georgius Sigismundus a Salburg in Falkenstein-4-*

Theophilus [?] a Salburg in Falkenstein-4-*

Paulus liber baro in Egk et Hungerspach-4-*

Johannes Helfricus Jorger liber baro a Chreispach et dominus in Toleto-4-*

Joannes Septimius Jorger dominus Toleti et baro Chreispachius-4-*

Christophorus Gebhardus Köberle Mittelberus-4-*

Nicolaus Stupanus Viennensis Austriacus nobilis-4-*

Lucas Stupanus Viennensis Austriacus nobilis-4-*

Laurentius Schütter in Clingenberg et Windthaag-4-*

Gothofredus Übermannus Pergkyrchensis Austriacus-4-*

Bernardus Bruntalski liber baro Avirbna-4-#

Georg David Leysser Styrus-4-*

Giovanni Larysch di Elgott Bohemus-4-#

Johannes Wilhelmus liber baro a Freinstain-4-*

Georgius baro a Stubenberg-4-*

Wolffgangus baro a Stubenberg-4-*

Joannes Gualtherus Viennensis Austrius-4-*

Elias Reichardus Viennensis Austrius-4-*

Jonas Hilprandt Viennensis Austrius-4-*

Joannes Ersselhoven Viennensis Austrius-4-*

Philippus Jacobus Weiss Tyrolensis-4-*

Georgius Sigismundus baro a Firmian et Cronez-4-+

Andreas liber baro ab Aursperg in Purgstall et Wasen-4-*

Joannes Smil a Michalovicz-4-#

Mathias Steinpach in Felixpurgk-4-#

Franciscus Listius liber baro in Kettse, Prellenkirchen et Kabold-4-=

Georgius Guertnerus junior in Egenburg Viennensis Austrius-4-*

Jacobus Oppy Raika-Ungarus-4-=

Christophorus Jacobus Lansperger Austrius Viennensis-4-*

Daniel Lansperger-4-*

Adam Godfrid Berca de Duba et Lippa-4-#

Fridericus comes ab Hodicz-4-#

Erasmus junior baro a Starhemberg-4-*

Rudolphus liber baro ab Hoffkirchen-4-*

Carolus Schmid a Freyhofen in Cunstad-4-#

Rudolphus Seydlicius liber baro a Schenfeld-4-#

Albrecht Felix von Lukawicze-4-#

Wolffgangus Albertus Engl a Wagram et Lyzelberg Austrius-4-*

David Urkauff Styra-Austrius-4-*

Sigismundus Maximilianus Graswein baron [in Weyer]-4-*

Carolus Eusebius liber baro de Herberstein-4-*

Philippus Fortunatus Pragensis pylegrinus Hyerusalementanu-4-#

Sebastianus Hencl a Donnersmark-4-=

Joachimus Spindler Viennensis A[ustrius]-4-*

Petrus Bochorizhius Labacensis Carniolanus-4-+

Georgius Ulricus baro a Kainach-4-*

Rudolphus liber baro a Stadl-4-*

Jacobus Franciscus liber baro ab Herberstein-4-*

Wolfgangus Andreas Pentingerus Vienna-Austriacus-4-*

Christophorus Erasmus a Sommerfeld et Tumintz-4-#

Georgius Alexius Mossaur de Waldaw Bohemus-4-#

Henricus Dobrzikowsky de Malegow Bohemus-4-#

Joannes Fridericus Sinzel Passaviensis Austriacus-4-*

Joannes Georgius Sinzel Passaviensis Austriacus-4-*

Joannes Jacobus Sinzel Passaviensis Austriacus-4-*

Wincislaus Heraclius de Bliziva eques auratus Bohemus-4-#

Adamus Fridericus Daudlebsky de Daudleb eques Bohemus-4-#

Michael Watz nobilis Carniolanus a Neydeck-4-+

-4-Autriche, Italie, Hongrie, Tchéquie, Slovénie

Autriche-4-*

Bohême-Moldavie-4-#

Hongrie-4-=

Carniole-Trentin-4-+

1621-1630

Sigismundus Fridericus Tättenpeck Austriacus-4-*

Franciscus Andreas nobilis dominus a Raitnaw-4-*

Georgius Adamus Borzita S. R. I. comes de Martinitz-4-#

Joannes Sigismundus a Lamberg, baro-4-*

Joannes Maximilianus de Lamberg, baro-4-*

Georgius Sigismundus Galler baro Styrus Graecensis-4-*

Philippus Jacobus Carl. Austrius-4-*

Carolus de Grotta Carinthus-4-*

Sebaldus Roll Styrus-4-*

Joannes Ferdinandus liber baro a Khienburg, dominus in Landesperg Austriacus-4-*

Wolffgangus Christophorus Jörgerus liber baro-4-*

Hans Rudolph Borzhitta von Butsch eques Moravus-4-#

Matthias Braun Austrius-4-*

Otho David baron de Zinzendorff-4-*

Jacobus Ludovicus baro de Kueffstain Austriacus-4-*

Vitus Wurzl Austrius-4-*

Nathanael Ursinus a Petzlinowetz Bohemus-4-#

Johan Friderich Behr Brun[ensis]-4-#

Daniel Paur Austrius-4-*

Christophorus Forstnerus Austrius eques S. Marci-4-*

Johannes Gothofredus Stubick a Königstein Austrius-4-*

Johannes Abrahamus a Bock eques Bohemus-4-#

Joannes Theodorus Skrbensky a Hrzistis Moravus-4-#

Matthias Stubick a Königstein, etc.-4-*

Lazarus Stubick a Königstein, etc.-4-*

Joannes Ægidius Berner [de Rettenwert]-4-*

Maximilianus Zigklin ab Hochenszcaldt Tirolensis-4-*

Bernardus Canal Vilaro-Carinthus-4-*

Fridericus Rzainer freyher ex L.O. Ens (*lecture difficile*: freyher ou Fueysen R.L.O. Ens)-4-*

Joannes Wolfgangus a Schneburg e Tiroli-4-*

Joannes Guilielmus Murn nobilis Styrus-4-*

Johannes Jacobus Murn nobilis Styrus-4-*

Andreas Gottefret Regall Styrus-4-*

Maximilianus Yngram de Liebenrain Oenipontanus-4-*

Wolff Sigmundt von Purgstall in Crup undt Frheythurm-4-*

Gabriel Henkel von Donnersmarck-4-=

Sigmundt Adam Jöstel zu Lindt Veldten-4-*

Georg Friederich Henkel von Donnersmarck-4-=

Sigismundus Reichardus a Lasperg-4-*

Gregorius Kurtius de Niderdorf Tyrolensis-4-*

Joannes Adamus Berchtoldus Austriacus Viennensis-4-*

Zacharias Reihell Leoba-Styrus-4-*

Jonas Paust de Liebstadt Bohemus-4-#

Ferdinandus Ernestus Breiner baro in Stäbing, Fladnitz, Rabenstain Austriacus-4-*

-4-Autriche, Italie, Hongrie, Tchéquie, Slovénie

Autriche-4-*

Bohême-Moldavie-4-#

Hongrie-4-=

Carniole-Trentin-4-+

1631-1640

Ferdinandus Greff Ungarus Comoranensis (utpote famulus ex-procuratoris)-4-=

Joannes Michna comes de Vatzinova-4-#

Vitus Mairhofer Brixinensis urbis et dioeceseos e Tyroli-4-+

Adamus Georgius B.Bzensky a Proruba Boemus-4-#

Wenceslaus Ignatius Bzensky a Proruba Boemus-4-#

Georgius Hausman Margreidensis ex diocoesi Tridentina Tyrolensi-4-+

Joannes Bemnus Dolacensis [?]-4-+

Joannes Rudolphus liber baro a Greiffenberg-4-*

Johannes Andreas a Lengheimb eques Styrus-4-*

Georgius Sigefridus Breiner liber baro in Stibing, Flatniz et Rabenstein-4-*

Joannes Philippus a Knillenberg in Reihenbach Tyrolensis-4-+

Maximilianus Ernestus Burggravius et comes a Dohna, dominus in Wartemberg-4-#

Wolff Heinrich von Syor (Gyor) [?]-4-=

Johannes Hohenfelder ab Aistershaimb eques Austrius-4-*

Hercules Widmann Œnipontanus e Tyroli-4-*

Joannes Henricus Bubna baro de Libitz Bohemus-4-#

Petrus Carolus Vinckerus Vienna-Austrius-4-*

Joannes Joannelli Viennensis Austriacus-4-*

Paul Hartman baron d’Eubeswald-4-*

Joannes Henricus a Traunstorff ex Carinthia oriundus-4-*

Otto Joachimus Burggravius a Dohna-4-#

Conradus Fridericus Burggravius a Dohna-4-#

Nicolaus Jacob Hromada Pannonius-4-=

Wolffgangus Ferdinandus dominus de Testelsperg, liber baro in Lindt, Styriacus-4-*

Joannes Adamus Wolf Pragensis-4-#

Otto Friderich freyherr zu Herberstein-4-*

Sigmundt Moritz herrn in Weltz und Eberstain-4-*

Joannes Christophorus a Buobenhofen Brigantinus-4-*

-4-Autriche, Italie, Hongrie, Tchéquie, Slovénie

Autriche-4-*

Bohême-Moldavie-4-#

Hongrie-4-=

Carniole-Trentin-4-+

1641-1650

Mathias Roringer Labacensis provinciae Carnioliæ-4-+

Johannes Christofforus Rottner a Weyr Austriacus-4-*

Rudolf baron de Kouna [baro Austriacus]-4-*

Joannes Carolus Steidl Austriacus-4-*

Daniel Krupsky de Lewenfeldt Pragenus-4-#

Carolus Ludovicus liber baro de Eybesbaltus-4-*

Ernestus Christophorus Schaffalitzky de Muckendell-4-*

Georgius Nicolaus liber baro a Rosenberg-4-*

Wolffgangus Andreas baro de Rosenberg-4-*

Daniel Christophorus Krasnus (Grasny) Pilsensis Boemus-4-#

Michael Zollicoferus Viennensis Austriacus-4-*

Adolphus comes a Wagensperg Styrus-4-*

Adamus Quintinus liber baro ab Herberstein Austriacus-4-*

Jacobus Abrahamus Kraus Tyrolensis Bolsanensis-4-+

Joannes Wencelaus Bilek de Bilembergk Boemus-4-#

Adamus Antonius Gründemann de Falkenberg Austrius-4-*

Vitus Jacobus Spindler de Hoffeg Austriacus-4-*

Godefridus Engel de Waigrain Austrius-4-*

Ferdinandus Leopoldus S.R.I. comes a Nachodt, baro in Calenberg Moravus-4-#

Ferdinandus Hentaller Austriacus Viennensis, phil. et J.U.D.-4-*

Sigismundus Ludovicus Zörer Württingensis Austrius-4-*

Wolffgangus Ignatius a Kaltenhausen in Greiffenstein Styrus, Gracensis provincialis-4-*

Wencelaus comes de Thun-4-#

Michael Oswaldus comes de Thun-4-#

Joannes Theodoricus Sittart nobilis Styrus Gracensis-4-*

Norbertus Hermannus liber baro a Questenbergh-4-*

Ferdinandus Firnschilt Viennensis Austriacus-4-*

Wolffgangus dominus a Stubenberg-4-*

Joannes Albertus De Witte de Lilienthal eques ac provincialis Boëmus-4-#

Wolffgangus Ferdinandus Vischer Styrus Gracensis-4-*

Fridericus Ludovicus de Kanoffsky-4-#

Georgius Godofredus Zillingerus Viennensis Austriacus-4-*

Martinus Christophorus Metzger Viennensis Austriacus-4-*

Franciscus Stupan ab Ehrnstein provincialis Austriacus Viennensis-4-*

Joannes Adamus Ollinger Moravus Brunensis-4-#

Georgius Ernestus a Teittenhoffen Carinthiae provincialis-4-*

Philippus Jacobus a Taittenhoffen Carinthiae provincialis-4-*

Maximilianus Jabornigg ab et in Gambsenegg Carinthiae provincialis-4-*

Hermannus comes ab Attimis-4-+

Henricus comes ab Attimis-4-+

Michael Koch Pragensis Boemus-4-#

David Wagner de Rottenpuech Tirolensis-4-*

-4-Autriche, Italie, Hongrie, Tchéquie, Slovénie

Autriche-4-*

Bohême-Moldavie-4-#

Hongrie-4-=

Carniole-Trentin-4-+

1651-1660

Andreas Platzer Clagenfurtensis Carinthus-4-*

Georgius Keller Pragensis Boemus-4-#

Joannes Wenceslaus Klw a Raudna Boemus Pilsnensis-4-#

Carolus [Ludovicus] Anreiter nobilis Tyrolensis Bulsanensis-4-+

Franciscus Benedictus Berchtold liber baro ab Ungerschiz Austriacus-4-*

Franciscus Ignatius de Ello baro Austriacus-4-*

Wolfgangus Fridericus Hoffman liber baro in Grunpuhler Strechau Moravus-4-#

Martinus Gerzhar Austriacus-4-*

Franciscus Guillielmus liber baro a Walderskirchen Austriacus-4-*

Wolfgangus Christophorus Sechlinger de Johanstein Styrus Gracensis-4-*

Joannes Ernestus liber baro de Windischgraz Austriacus-4-*

Maximilianus Gundaccarus dominus ab et in Polhaimb liber baro Austriacus-4-*

Wiccardus Achilles dominus ab et in Polhaimb liber baro Austriacus-4-*

Sigismundus Rudolphus Haberlandt nobilis Austriacus-4-*

Adamus Guilelmus S.R.I. comes et dominus a Brandis Austriacus-4-*

Jacobus Andreas S.R.I. comes et dominus a Brandis-4-*

Christophorus Leysser baro in Kronsegg et Schiltern, Michelbach et Neutzen Austrius-4-*

Joannes Franciscus Pratnikel Marcomannus Iglaviensis-4-#

Johannes Christophorus Stubenvoll nobilis Austriacus-4-*

Wilhelmus Rayger (Reger) Viennensis Austriacus. *Décédé le 13 octobre 1656*-4-*

Ferdinandus Rayger Viennensis Austriacus, med. doctor-4-*

Comites de Harrach, *mai 1657*. Discesserunt-4-*

Protasius Schinagl Salisburgensis-4-*

Joannes Albanus Kirchmaier Austriacus Viennensis-4-*

Joannes Jacobus Wels Styrus-4-*

Georgius Godofredus comes ab Urschempekh Austriacus-4-*

Gervasius Schinagl Salisburgensis-4-*

Sigismundus Josephus liber baro ab et in Spangstein p[atricius] Norimberg-4-*

Georgius Andreas Berthonides a Tyrans Moravus-4-#

Franciscus Sigismundus liber baro a Grotta-4-*

Joannes Ernestus liber baro de Fünfkirchen dominus in Stanebrun Austriacus-4-*

Joannes Carolus liber baro de Fünfkirchen dominus in Matzen Austriacus-4-*

Joannes Burchardus Staindl, J.U.D., Carinthus Clagensis-4-*

Joannes Fridericus Ferdinandus liber baro a Sideniz-4-*

Gregorius Ignatius liber baro a Sideniz-4-*

Albert B[a]ron de Rattmanstorff Styrus Grecensis-4-*

-4-Autriche, Italie, Hongrie, Tchéquie, Slovénie

Autriche-4-*

Bohême-Moldavie-4-#

Hongrie-4-=

Carniole-Trentin-4-+

1661-1670

Ericus Kevenhuller liber baro ab Aichlberg-4-*

Joannes Christianus S.R.I. comes ab Adelsperg, princeps a Eggenberg-4-*

Joannes Sigefridus S.R.I. comes ab Adelsperg, princeps a Eggenberg-4-*

Sigismundus Fredericus liber baro Galler-4-*

Guilielmus Albertus Wock Wytha h. b.de Zerzawy Boemus Pragensis-4-#

Petrus Hroch de Peschitz Boemus-4-#

Melchior Reisinger nobilis Ungarus-4-=

Demetrius Venceslaus Kuznitski de Jarnerisz Moravus-4-#

Daniel Carolus Berman (nom biffé) Austriacus Viennensis-4-*

Servatius Engl d’Englsflus Boemus Pragensis-4-#

Tobias Fleischer de Nagy Szeben Transsylvanus-4-=

Laurentius Toppeltinus de Medgyes Saxo Transsylvanus-4-=

Adamus Maximilianus comes de Bubna et Littytz Bohemus-4-#

Joannes comes von der Nath-4-#

-4-Autriche, Italie, Hongrie, Tchéquie, Slovénie

Autriche-4-*

Bohême-Moldavie-4-#

Hongrie-4-=

Carniole-Trentin-4-+

1671-1680

Henricus Heichel Un[garus] Posoniensis-4-=

Franciscus Gallus liber baro de Lichtenberg, Noribergensis domic., nati[one] Carnius-4-+

Franciscus Sigismundus de Widerkern Carniolus-Labacensis-4-+

Ja[c]que Calfels de Deynitz-4-#

Franciscus Jacobus Colschen Trensis-4-+

-4-Autriche, Italie, Hongrie, Tchéquie, Slovénie

Autriche-4-*

Bohême-Moldavie-4-#

Hongrie-4-=

Carniole-Trentin-4-+

1681-1689

Wolffgangus Fridericus Kemeter liber baro-4-*

Joannes Franciscus S.R.I. comes Galler-4-*

Leopoldus Carolus S.R.I. comes Sauer-4-*

Ignatius Klain Salisburgensis-4-*

Antonius Berlinger Bulsanensis Tyrolensis-4-+

Joannes Carolus Rzickowsky eques Moravus de Dobertzitz Brunensis-4-#

Georgius Ignatius Xaverius Wolf Bohemus Glacensis-4-#

-4-Autriche, Italie, Hongrie, Tchéquie, Slovénie

Autriche-4-*

Bohême-Moldavie-4-#

Hongrie-4-=

Carniole-Trentin-4-+

1721-1781

Franciscus Carolus liber baro de Radolt diocesis Vien[n]ensis-4-*

Philippus Jacobus liber baro de Radolt diocesis Viennensis-4-*

-5-Belgique, Luxembourg, France

Flandre-Brabant-5-*

Liège-5-=

Hainaut-Namur-Luxembourg-5-#

Artois-Flandre gallicane-5-+

1602-1610

Joannes Lobetius de Lanchin Leodius-5-=

Petrus de Semerpont Atrebatensis-5-+

Joannes Desmaisieres Valentianus-5-+

Anthonius Menche Bethuniensis-5-+.

Joannes Baptista a Mallery Antverpiensis Belga-5-*

Ludovicus van Eynatten Archotensis-5-*

Carolus Lespillet Bethuniensis-5-+

Guilielmus de Fuldre Airiensis-5-+

Maximilianus Soubille Montensis-5-#

Robertus de Villers Atrebatensis-5-+.

Carolus de Cheort Atrebatensis-5-+.

Bernhardus de Tongren [?]-5-=

Maximilianus Le Merchier Atrebatensis-5-+

Joannes de Wasquehal a Lassus Insulenus Flander-5-+

Joannes de Preudhome dictus de Hailly, baro de Poucques-5-*

Philippus de Hurges Atrebas-5-+

Gerardus Caroli Leodius (promotus in doctorem anno 1606, 5 julii)-5-=

Petrus a Castello Belga Flander Gerardimontensis (Flandriae imperialis)-5-*

Mathias Hesselæus a Dinter Antverpiensis Belga-5-*

Joannes Mean nobilis Leodicus-5-=

Petrus Gemart Brabantus [?]-5-*

Christianus de Haze Yprensis Belga-5-*

Franciscus de Moncheaux Atrebas-5-+

Natalis Handovart Atrebas-5-+

Arnoldus Omalius Leodiensis nobilis-5-=

Joannes Ascanius Bochius Bruxellensis-5-*

Philippus Vanner Brabantinus Lovaniensis-5-*

Antonius de Tassis Antverpiensis-5-*

Guilielmus Despomereaulx An[t]verpianus-5-*

Dionysius Libot Leodius-5-=

Michael Gelys, J.U.L., Leodius-5-=

Joannes Cochel Bethuniensis-5-+

Joannes de Warlincourt Bethuniensis-5-+

Petrus de La Riviere Insulensis-5-+

Jodocus de Bils Gandavensis Flander-5-*

Fabianus de Z’vliet (Zandvliet) Antwerpiensis Brabantinus-5-*

Robertus Tabollet Dionantensis-5-#

Joannes Baptista Busteel Yprensis Flander-5-*

Augustinus Baccart Antwerpianus-5-*

Joannes Crul Samarobrinus (Saint-Quentin ?)-5-+

Franciscus du Grospas Atrebatensis-5-+

Joannes Crul Cameracensis-5-+

Robertus Hazet Atrebatensis-5-+

Guillielmus Hazet Atrebas-5-+

Joannes Valentinianus Wellenstein Luxemburgus natione-5-#

Christianus Meese Brugensis-5-*

Alexander Taurenyer Atrebatensis-5-+

Wallerandus Chombault (Gombault) Insulensis-5-+

Guilhelmus Boele Gandensis Flander-5-*

Robertus de S. Omer vicecomes Aeriensis dominus de Morbecq-5-+

Jacobus Gaenart (Claenart) Antwerpiensis-5-*

Adrianus de Vallieres nobilis Hannoniensis-5-#

Carolus Philippus de Liedekercke Cortracensis-5-*

Carolus de Bommarchiel Duacensis-5-+

Hubertus Hauwel Atrebatensis-5-+

Louys Lopesgalle de Vormiselle Belga-5-*

Franciscus de Hayrim Sicliniensis-5-+

Jacobus Bretel Atrebas-5-+

Joannes Baptista de Fenaystres Athensis-5-*

Walterus de Herttoge Antwerpiensis-5-*

Claudius Bourgeois Hesdiniensis-5-+

Johannes Frarin Antverpiensis-5-*

Petrus Mibais Leodecensis-5-=

Jacobus du Val Atrebatensis-5-+.

Joannes Demetieres Insulanus-5-+

Philippus de Croix Insulanus-5-+

Franciscus van Logenhagen Insulanus-5-+

Jahn Couvereur van Antwerpen (huic remissum jus matriculae)-5-*

Balduinus Boele Gandensis-5-*

Walterus Taelmans Herckensis, dioecesis Leodiensis-5-=

Robertus Foucquier Atrebatensis-5-+

Franciscus Jacomel Caletanus, U.J.D.-5-+

Magister Samuel a Cudsem patria Wesaliensis, gente Brabantinus-5-*

Balduinus de Croix Insulensis-5-+

Sebastien de Cleve dit La Lande Flamant-5-*, bode van de dui[t]sche natie.

Joannes Massetus Leodiensis-5-=

Eustachius Liverloz Leodiensis-5-=

Petrus Gregorius Atrebas-5-+

Joannes de Villers Anlestro-Cameracensis-5-+

Joannes van den Eechaute Gerardimontanus Flandriae Imperialis-5-*

Jonathas van den Etuuecht Leodiensis-5-=

Joannes Baptista Vrancx Bruxellensis-5-*

Cornelius van Dale Antwerpiensis Belga-5-*

Samuel Baccherus Brabantus-5-*

Franciscus van Halewyn Flander-5-*

Johannes de Manisz (Onamsz) Flander-5-*

Isaacus van der Voort Andoverpiano-Brabantus-5-*.

Petrus Penneman Gandensis Belga-5-*

Franciscus Liverloz Leodius-5-=

Waltherus Liverloz Leodius-5-=

Joannes Buisineus Atrebas-5-+

Carolus Gossoy Atrebas-5-+

Antonius de Lens Audomarensis-5-+

Joannes Neufforge Leodius-5-=

Carolus de Longueval Duacensis-5-+

Hugo Georgius de Bassecourt Vallencenensis-5-+

Erasmus a Cokier Leodiensis-5-=

Martinus de Mons Insulensis Flander-5-+

Petrus ab Oeteren Masehanus, dioecesis Leodiensis-5-=

Adrianus de Meleun Bethuniensis-5-+

Philippe de Hamal [?]-5-#

Petrus de Germencourt (Sereneucourt) Arthesiensis-5-+

Petrus de Steel Leodiensis-5-=

Thomas Saulveur Leodicensis-5-=

Ludovicus de Cordes Flander Tornacensis-5-#

Paulus de La Grange Flander Insulensis-5-+

Joannes de Trieche (Trexhe) Leodius-5-=

Ægidius Desclee Leodiensis-5-=

Guilhelmus de Miche Leodiensis-5-=

Ludovicus Sprimont Leodiensis-5-=

Petrus Ernestus Oranus Leodiensis-5-=

-5-Belgique, Luxembourg, France

Flandre-Brabant-5-*

Liège-5-=

Hainaut-Namur-Luxembourg-5-#

Artois-Flandre gallicane-5-+

1611-1620

Joannes Godart Leodiensis-5-=

Johannes Gelys Leodiensis-5-=

Julius Cæsar Mechliniensis Belga-5-*

Henricus Witten Diestensis Brabantus-5-*

Henricus van Etten Antwerpias-5-*

Adrianus van Etten Antwerpiensis-5-*

Joannes Philippus de La Maze [?]-5-=

Edmundus [?] Omalius Leodiensis-5-=

Renaldus de Sluze Leodiensis-5-=

Guilielmus Carolus ab Hemnicourt Leodiensis-5-=

Hugo Deslions Bethuniensis-5-+

Joannes Loen a Kemexhe Leodius-5-=

Joannes Delheye Leodius-5-=

Henrick von Gentth de Flandre Utrecht-5-*

Guilhelmus a Morlimont Leodiensis-5-=

Eustachius de Pressy Atrebatensis-5-+

Jacobus de La Rille Hanno-Montanus-5-#

Ludovicus de La Riviere baron de Heere-5-*

Henricus de La Riviere, baron de Heere, frater hujus-5-*

Carolus de Tassis Bruxellensis-5-*

Philippus Desgaerdius Attrebatensis-5-+

Andreas Le Merchier Duacensis-5-+

Guilielmus a Wezeren Eburo-Leodius-5-=

Alexander ab Heere Lossensis-5-=

Antonius Legrand Betunæus (Aredunensis ?)-5-+

Leo de Maulde Bethuniensis-5-+

Johannes van den Verre Mechliniensis-5-*

Guilhelmus Saulveur Leodiensis-5-=

Gregorius Wytfliet Bruxellensis-5-*

Walramus Hac Antwerpiensis-5-*

Joannes Sprimont Leodiensis-5-=

Dominus N. ……… Le Maistre Leodiensis-5-=

Guillielmus van den Eynde Bruxellensis-5-*

Guillielmus Gheerems Bruxellensis-5-*

Joannes van Reest Bruxellensis-5-*

Ladislaus van Ghindertalen Bruxellensis-5-*

Joannes le Clercq Bruxellensis-5-*

Robertus Lemiersin (Comiersin) Audomarensis-5-+

Thomas Goghen (Coghen) Diestemius-5-*

Franciscus le Secq Bethunæus-5-+

Anthonius de Rode Marchant or[iundus] …..?-5-+

Ludovicus Broomanus Bruxellensis-5-*

Henricus de Bundele Alostensis Flander-5-*

Joannes Diane Albimontanus (huic natio jus immatriculationis remisit) [?]-5-*

Guilhelmus Lochon Leodius-5-=

Johannes de Renialme Belga [?]-5-*

Stephanus Poeilli Insulensis Flander-5-+

Franciscus Thomas Bethuniensis-5-+

Joannes van Iderssem Bruxellensis-5-*

Joannes D’Ans-5-=

Andreas Sutendael Mastrehanus-5-*

Joannes Macors Dionantensis-5-#

Ernestus Heller Leodiensis-5-=

Andreas Mathias Horion Montensis Hannonius-5-#

Conrardus Blisia Leodiensis-5-=

Ludovicus Lassennot Leodiensis (*son arrestation à Orléans*)-5-=

Jacobus Gal Leodiensis-5-=

Andreas Hellweghen Leodiensis-5-=

Ludovicus de Chockier Leodiensis-5-=

Dionysius de Masillon Leodius-5-=

Joannes Baptista de Herbais aleas Schotte Bruxellensis-5-*

Franchiscus Nescius Adrianus [?]-5-*

Ludovicus Oranus Leodius-5-=

Bartholomeus Masset Leodius-5-=

Gerardus Hadin Leodius-5-=

Joannes (du) Montanus Athensis-5-#

Guilielmus Croon Gandensis-5-*

Nicolaus Slenevaulx (Eslenevaerts) Leodiensis-5-=

Ernestus de Billehe nobilis Leodiensis-5-=

Lambertus Woet Leodius-5-=

Joannes de Imaige Insulensis-5-+

Ægidius Verschueren Antverpiensis-5-*

Joannes Baptista Goos Antverpiensis-5-*

Petrus Lehault Leodiensis-5-=

Petrus Vecquertius Leodius-5-=

Joannes Gilles Insulensis ex Flandria-5-+

Joannes Brandt Antverpiensis Brabantus-5-*

Emanuel Putschius Antverpianus-5-*

Lammoraldus de Provyn Iprensis Flander-5-*

Joannes Laurentii Dionantensis-5-#

Ægidius Ha.gephon Valentianus (*lecture difficile*)-5-+

Carolus Rolandus de Suys Leodius-5-=

Nicolaus de Lonmarcheet Duacensis-5-+

Arnoldus Hoefslach Bruxellensis-5-*

Joannes Bernard Tornacensis-5-#

Joannes Woel (Woet) Leodius-5-=

Jacobus Welheer Lovaniensis Brabantus-5-*

Mathias D’Ans Leodius-5-=

Fastrardus Lintermans Leodius-5-=

Laurentius Laurentii Leodiensis-5-=

Joannes Bosschaert Antverpiensis-5-*

Ludovicus Gaeke (Haecke) Bruxellensis-5-*

Lotharius Froitzheim Brugensis patriae Juliacensis-5-*

Joannes Baptista de Ram Antverpiensis, J.U.L.-5-*

Joannes de Hespel Insulensis, J.U.L., Duacenus-5-+

Pierre de St. Vaast Duacensis-5-+

Erasmus Noppis Leodiensis-5-=

Charles François Le Maire de Douay-5-+

Hermannus ab Hanxeler Leodius-5-=

Michael Regnaerdt Leodiensis-5-=

Paulus de Heylwighen Bruxellensis, provinciae Brabantiæ-5-*

Melchior Martins Gandensis Flander, januarii 1621-5-*

Joannes Goeswin Leodiensis, februarii 1621-5-=

-5-Belgique, Luxembourg, France

Flandre-Brabant-5-*

Liège-5-=

Hainaut-Namur-Luxembourg-5-#

Artois-Flandre gallicane-5-+

gouverneur des Pays-Bas espagnols-5-@

1621-1630

Jacobus Bam Leodiensis (*ou*Leidensis)-5-=

Adrianus de Brongniart Atrebas-5-+

Petrus de Eitey Atrebas-5-+

Georgius de Crombruyghe Cortracensis-5-*

J. De La Tramerye baro de Roysin -5-+

Ludovicus De La Tramerye baro Doby-5-+

Lambertus Gaen Leodius-5-=

Petrus Witte Leodiensis (*sur la liste des* ‘infames’)-5-=

Nicolaus Prouueus Vallentianus-5-+

Abrahamus Bureau Pomidiensis (*lecture difficile*)-5-+

Ludovicus Couckelbergius-5-*

Martinus Perez Leodiensis-5-=

Carolus Sprotius Leodiensis-5-=

Guislenus Pattinier Atrebas-5-+

Philippus du Val Atrebas-5-+

Ludovicus Buirette Montibus Hannoniae-5-#

Jacobus Buysset Mechliniensis-5-*

Ernestus Perez Leodiensis-5-=

Lucas van Horne Antwerpiensis-5-*

Robertus de Flandres Atrebatensis-5-+

Balduinus Borle Leodiensis-5-=

Franciscus de Bengin Bethunisus-5-+

Thomas Massetz Leodiensis-5-=

Melchior Bensel Namurcensis-5-#

Joannes Heyens (Hayens) Antverpiensis-5-*

Flippo de Deckere Antverpiensis-5-*

Florentius Colbaut Insulensis-5-+

Paulus Bureau Hannomontanus-5-#

Joannes Le Thuellier Hannomontanus-5-#

Martinus Liverloz Leodiensis-5-=

Hugo Brios Atrebas. *Décédé le 29 novembre 1622*-5-+

Jacobus Uwens Antwerpiensis-5-*

Antonius Lauris Bethuniensis-5-+

Arnoldus Gregorii Harsyus Leociensis-5-=

Georgius Le Vasseur Atrebas-5-+

Ægidius de Soy Marchiensis-5-#

Joannes Chamart Montensis-5-#

Antonius Levis Atrebatensis-5-+

Ludovicus Le Sergeant Atrebas-5-+

Antonius de Marconville Atrebato-Arthesius-5-+

Philippus Le Seellier Duacensis-5-+

Antonius van Omel Antverpiensis, licentiatus-5-*

Antonius Espillet Bethuneus, J.U.L.-5-+

Michael Berdiere Insulensis-5-+

Claudius de Landas Atrebæus-5-+

Hugo Pollart (Lollart ou Sollart) Bethuniensis-5-+

Nicolaus de Sain….. ? (*lecture difficile*)-5-+

Leo de Theux Leodius-5-=

Wynandus de Jonchiere a Leerne patriae Leodiensis-5-=

Alexander Obert Atrebatensis-5-+

Carolus Obert Atrebatensis-5-+

Joannes ab Oeteren Leodius-5-=

Frater Maximilianus Martinii Stella Antverpiensis, ordinis Sancti Dominici sacerdos-5-*

Frater Ludovicus de Ruy, ordinis Sancti Dominici sacerdos-5-*

Antonius de Hennius de Talma Valencenensis-5-+

Joannes Boniface Atrebas-5-+

Furseus Hecquin Atrebæus-5-+

Louis de Tympel Lovaniensis-5-*

Cornelius Ryckebusch Yprensis-5-*

Robertus Erche Iprensis-5-*

Joannes van der Beke Yprensis-5-*

Frater Petrus de Amore, S Theologiae professor, Leodiensis-5-=

Ludovicus Laurentius Perez de Barren Antwerpiensis-5-*

Guilliam van der Aa d’Hamd (*ou* d’Eamd ?)-5-+

Franciscus de Fourmesteraux Insulensis-5-+

Guilielmus van der Linden Gandensis-5-*

Petrus van Oncle Bruxellensis-5-*

Ogerus Bra, diocesis Leodiensis clericus-5-=

Balduinus Golley Leodius-5-=

Philippus Gal Leodiensis-5-=

Petrus de Hemond Leodius-5-=

Gislenus Obert Atrebatensis-5-+

Perpetuus de Wespin Dionantensis-5-#

Johannes van Ghyseghem Gandavo-Flander

Joannes Baptista du Val Atrebato-Arthesianus-5-+

Franciscus Bassee Artesianus-5-+

Nicolaus Canne Arthesianus-5-+

Franciscus Meys Leodiensis-5-=

Franciscus de Haffringues Audomaro-Artesius-5-+

Joannes Rovier Luxemburgensis (famulus domini procuratoris)-5-#

Guilbertus du Chastel Insulensis-5-+

Franciscus Preudhom[m]e de Borre Leodiensis-5-=

Guilhelmus a Wansoule Leodiensis-5-=

Jan Geurts van Vendeloo (famulus domini procuratoris)-5-*

Joannes Behagle Insulensis (quia pauper pro nihilo receptus est)-5-+

Henricus Fontaine Leodius-5-=

Joannes de La Roche Leodiensis-5-=

Gasparus de La Roche Leodiensis-5-=

Bartholomeus Lowier Leodiensis-5-=

Joannes Rosen Leodius (infamis)-5-=

Carolus D’Ans Leodius (infamis)-5-=

Petrus d’Arthois Leodiensis-5-=

Erhardus de Leefdael Arschotanus-5-*

Petrus van Hove Antverpiensis-5-*

Joachimus van Postel Lyranus-5-*

Maximilianus Gosrinus Bruxellensis-5-*

Joannes Baptista de Lattre dominus de Helsdonck Antverpiensis-5-*

Leonardus Cornelius Cheeus Antverpiensis-5-*

Petrus Cornelius Cheeus Antverpiensis*. Décédé à Orléans 1627*-5-*

Raphael Bulteel Cortracenus Flander-5-*

Philippus Oliviers Mechliniensis-5-*

Franciscus van Dixmude Iprensis-5-*

Gulielmus van Dixmuda Iprensis-5-*

Joannes Franciscus de Pamele Iprensis-5-*

Joannes Colbaux Belgio-Dionantensis-5-#

Nicolaus van Hove Antverpiensis-5-*

Joannes Tabollet Leodio-Dionantensis-5-#

Renier Immebac van Winocsberch-5-+

Joannes Gerardus de Imstenraede Dalemo-Flander-5-*

Bernhardus de Lassenotte Leodius-5-=

Michael Clarebaut Gandensis-5-*

Joannes des Marets Leodius-5-=

Carolus de Mean Leodius-5-=

Matthias de Beringhen Leodius, J.U.L., Lovaniensis-5-=

Cornelius Bouwens Antverpiensis-5-*

Daniel Gowaerts van Holle [?]-5-*

Nicolaus Raue Leodiensis (*lecture difficile*)-5-=

Joannes Linter Bruxellensis-5-*

David Linter Bruxellensis-5-*

Ambrosius Spinola, marchio Barbases, 1628-5-@

Delido de Leganes, pro Hispaniarum rege in Belgio gubernator-5-@

Carolus de Zevicote Gandensis-5-*

Joannes des Chocquiers Leodius-5-=

Ægidius Roscius Leodiensis-5-=

Odoardus Nospis Mosævisetanus-5-=

Walerandus de Courouble Insulensis-5-+

Ferdinandus Boudeus Brugensis-5-*

Maximilien Spanoghe Flander Brugis-5-*

Caspar Damman Flamen de Gandt-5-*

Philippus a Scharenberger Leodiencis-5-=

Antonius Foucquier Arthesianus Atrebatensis-5-+

Bartholomeus Charlem Arthesiensis Bethuniensis-5-+

Johannes van Haeften Mechliniensis-5-*

Robertus du Bus Insullensis-5-+

Joannes Baptista Brias Gandensis-5-*

Mattheus de Soumaigne Leodius-5-=

Franciscus Adriaensen Iprensis-5-*

Christianus Heyns Neoclesianus, dioecesis Iprensis-5-*

Ægidius Bruneau Tornacensis-5-#

Joannes Christiani Brabantus Broeckoemensis-5-*

Joannes Stappens Winocibergensis Flander-5-+

Guillielmus Melis Bruxellensis-5-*

Ludovicus de Mainsent H[anno]-Montensis-5-#

Severinus van der Burch Hanno-Montensis-5-#

Petrus Inghelvert Dunckercanus Flander-5-+

Dionysius de Potessat Leodiensis-5-=

Guilielmus Stappens Bergensis St W[ino]ci-5-+

Lambertus Emundus Tabollet Leodius-5-=

Guilielmus de Succa Leodius-5-=

Ogerus Beeckman Leodius-5-=

Franciscus de Succa Leodius-5-=

Robertus Franciscus Tabollet Leodius-5-=

Joannes Gaspardus Des Trompes de Westhove Iprensis-5-*

Alexander de Vooght Bruggensis-5-*

Rolandus Stormius Lovaniensis-5-*

Franciscus Quarré Atrebato-Arthesius-5-+

Anthonius Corlier Atrebato-Arthesius-5-+

Jacobus Moreau Leodiensis-5-=

Joannes Baptista Cevillon Insulensis, dioecesis Tornacensis-5-+

Judocus van den Eeden Bruxellensis-5-*

Adrianus de Hennin Hannoniensis Vallencenensis-5-+

Joannes Jacobus Desmaisieres Vallencenensis-5-+

Joannes de Ligniers Cameracensis-5-+

Hermannus Omalius Leodiensis-5-=

Johannes de Schinckelle Furnensis in Flandria dominus d’Esperoncourt-5-*

Antonius Rousseel Bergis Sancti Winnoci-5-+

Carolus Menche Bethuniensis-5-+

Jacobus de Bernemicourt Arthesiensis-5-+

Robertus Tabollet Leodiensis-5-=

Petrus de Bane Flander Belliolanus-5-#

Leonardus van den Noot Bruxellensis-5-*

Godefridus d’Oyenbrugghe Grimbergensis-5-*

Antonius Le Marchant Attrebas-5-+

Joannes Hanot Hanno-Montanus-5-#

Nicolaus Robertus Brabantus patria, civitate Bruxellensis-5-*

-5-Belgique, Luxembourg, France

Flandre-Brabant-5-*

Liège-5-=

Hainaut-Namur-Luxembourg-5-#

Artois-Flandre gallicane-5-+

1631-1640

Ferdinandus de Diffuy Leodius-5-=

Remigius Poulle Belga Insulensis-5-+

Ludovicus Rogerius de Clarisse Bruxellensis-5-*

Jacobus Adami Maisterton Teneræramondanus Flander-5-*

Ægidius de Le Porte Insulensis Flander-5-+

Carolus van Naelde Broubourganus Flander-5-+

Ægidius Tabollet Dionanto-Belga-5-#

Franciscus Le Sergeant Atrebas-5-+

Charolus de Mol Atrebas-5-+

Philippus Helman Antverpiensis-5-*

Joannes Ferdinandus Helman Antverpiensis-5-*

Carolus de Douay Atrebatensis-5-+

Philippus de Haynin Gandensis Flander-5-*

Nicasius de Le Porte Insulensis-5-+

Joannes Baptista de Haen Bruxellensis-5-*

Guillielmus Hasselt Leodius-5-=

Artus du Fief Tornacensis Flander-5-#

Valentinus de Bassecourt Valenchenensis Belga-5-+

Joannes aux Brebis Leodius-5-=

Waltherus de Besançon Leodiensis-5-=

Ernestus a Barbu Stabulensis-5-=

Joannes Baptista Le Seellier Duacensis-5-+

Carolus Widebien Attrebatensis-5-+

Hubertus du Champs Leodius -5-=

Joannes van der Goes Antverpiensis-5-*

Andreas van Kerrenbroeck Bruxellensis-5-*

Albertus a Lymborch Leodius-5-=

Ernestus a Barbu Stabulensis-5-=

Philippe d’Haulfalise de Louain-5-*

Eugene de Vos de Louain-5-*

Louis de La Vocel de Lutsenbourg-5-#

Maximilianus de Gand comes d’Issinghyen-5-*

Philippus Baltazar de Gand, baro de Rasseghyen-5-*

Joannes Jehenneaux Dionantensis-5-#

Christophorus de Ramlo Leodius-5-=

Joannes Baptista Zegers Antverpiensis-5-*

Arnoldus van der Boven Antverpiensis-5-*

Paulus Le Seellier Duacensis-5-+

Henricus Le Sart Premontensis ex Cameracesio-5-+

Guilielmus Desmartins Tornacensis-5-#

Thomas Daelman Winnoci-Bergensis-5-+

Petrus Aertius Leodius-5-=

Petrus Piermont Winnoci-Bergensis-5-+

Lancilottus de Cordes Antverpiensis-5-*

Jacobus van Steelandt Bruxellensis-5-*

Petrus de Mory Atrebatensis-5-+

Franciscus Gonçales de Saldaigne Brugensis-5-*

Franciscus Granier Gandensis Flander-5-*

Fridericus Boulanger Cameracensis-5-+

Joannes Stembert Verviensis Leodiensis patriae-5-=

Joannes van der Thommen Lovaniensis-5-*

Guilielmus van Schoone Gandensis canonicus Aquisgranensis-5-*

Theodorus de Weerdt Bruxellensis alias Ameyden-5-*

Franciscus van de Brouke Iprensis-5-*

Philippus princeps comes Arenbergen dux Arschotanus 1633-5-*

Adrianus de Verité Atrebas-5-+

Petrus de Hennin Cameracensis-5-+

Ludovicus Bruneau Menius-5-*

Jacobus Carlier Bethuniensis-5-+

Franciscus Carlier Bethuniensis-5-+

Petrus Franciscus van Heymbeke Bruxellensis-5-*

Ferdinandus van der Dilft Lyranus-5-*

Nicolaus Ludovicus de Harre Leodiensis-5-=

Carolus Schotte Bruxellensis, eques, cum Hispanias legationis causa-5-*

Arnoldus ex Palude cum Hispanias cum duce Arscotano peteret-5-*

Joannes Henricus Gobelinus ducis Arschotani secretarius natione Luxemburgensis-5-#

Georgius Baelde Furnensis in Flandria-5-*

Petrus Blomme Loensis in Flandria-5-*

Arnoldus van Houcke Yprensis-5-*

Franciscus de Schoet Hondischotanus Flander J.U.L.-5-+

Franciscus Fruict Insulensis-5-+

Joannes de Roly ex Roly ex patria Leodiensi-5-=

Jean Baptiste Paris Atrebatensis-5-+

Franciscus Menche Bethuniensis-5-+

Bartholdus de La Haxhe Leodius-5-=

Rolandus du Rieu Tornacensis-5-#

Ægidius Desmaretz Amandanus-5-+

Laurentius de Mean canonicus Leodiensis-5-=

Jacobus de La Barre Montensis-5-#

Christianus Naueaulx Thenensis-5-*

Theodorus de Noter Bruxellensis-5-*

Joannes Waritius de Rodelz alias Lalement Virtono-Luxemburgus-5-#

Petrus des Maretz Leodius-5-=

Henricus Casin Marchiensis [Luxemburgus] (huic propter inopiam jura remissa sunt)-5-#

Cristhophorus Ritius Aentensis [?]-5-+

Sthephanus Fabri Leodius-5-=

Anthonius Libert Leodius-5-=

Gerardus Jamar Leodius-5-=

Conradus de Mean Belga Leodiensis canonicus-5-=

Natalis Caroli Leodius-5-=

Michael Clercæus Parisinus [?]-5-*

Thomas van Cassiopyn uut Brabant-5-*

Laurentius de Mean Leodius-5-=

Edmundus Blisia Leodiensis-5-=

Joannes Eustachius de Walcourt Leodius-5-=

Ottho Henricus Drys Leodiensis-5-=

Henricus de La Vaulx Leodiensis-5-=

Joannes du Saulcy (Lauley) Leodiensis-5-=

Ægidius Michael Beeckman Leodius-5-=

Franciscus Petrus Boccardus [?]-5-*

Joannes de Mean Leodiensis-5-=

-5-Belgique, Luxembourg, France

Flandre-Brabant-5-*

Liège-5-=

Hainaut-Namur-Luxembourg-5-#

Artois-Flandre gallicane-5-+

gouverneur des Pays-Bas espagnols-5-@

1641-1650

Franciscus Ludovicus Hubart Leodius-5-=

Anthonius de Lahaye Leodius (*nom raturé*: inter infames ob scelera sua relatus)-5-=

Franciscus Commelin Duacensis, dioecesis Atrabatensis-5-+

Bartholdus Goesvvin Leodius-5-=

Henricus Tonnar Leodiensis-5-=

Servatius de Fleron Leodius-5-=

Lambertus Liverloz Leodius-5-=

Lambertus Bregori (Gregori) Leodiensis-5-=

Andreas Vaes Tongrensis Leodius-5-=

Antonius Ernestus de Fleron Leodius-5-=

Jonathas Ertwecht Leodius-5-=

Franciscus de Liverlo Leodius-5-=

Valterus de Liverlo Leodius-5-=

Gulielmus Volleckens de Ronse Brabantus-5-*

J.F[ranciscus] de Sprimont Leodius-5-=

Bertrand Moreau Liegois-5-=

Winandus de Ville Huensis-5-=

Jean Baptiste Couplet Mechliniensis Brabantinus-5-*

Joannes de Neufcourt Leodius-5-=

Franciscus Bouuin Leodius-5-=

D. Francisco de Mello, M. De Tor Lag…, 1644, in Belgio gubernator-5-@

Nicolaus Plenevaulx Leodius-5-=

Franciscus Douglas dictus Schott Mechliniensis-5-*

Claudius Haccourt Leodius-5-=

Lambertus Neufcourt Leodius-5-=

Antonius Prevost Atrebatensis-5-+

Jacobus Beckers Leodius-5-=

Carolus Franciscus de Noicevaulx Leodius-5-=

Nicolas Jehenneaux fils de Jean Jehenneaux de Dinant-5-#

François de La Valleur Antverpiensis-5-*

Alexandre della Faille Antverpiensis-5-*

Stephanus a Wyels Antverpiensis-5-*

Joannes de Gerschoven Leodius-5-=

Hubertus Grumsel Leodius-5-=

Jacobus de Hodaige Leodius-5-=

Petrus Goirdinne Leodius-5-=

Petrus de Prealle Leodius-5-=

Guilielmus Ernestus de Fayn Leodius nobilis-5-=

Robertus Engelbertus baro de Celles Leodius-5-=

Wilhelmus van Toll Bruxellensis-5-*

Arnoldus Philippus Selys Leodius-5-=

Michael Eichius Wimpfl. ac Haslacensis canonicus, [Luxemburgensis]-5-#

Joannes Haling Leodius-5-=

Andreas Roscius Leodius-5-=

Gille Anne de Marquesat de Franchemont pays de Liège-5-=

Henricus Charle Leodius-5-=

Dionisius Ertwech Leodius-5-=

Joannes Maximilianus de Boom (Broon) Franconatensis-5-*

Petrus Balthazar van Calloen Franconatensis-5-*

Christianus van Calloen Franconatensis-5-*

Joannes Deodatus Potestat Leodius-5-=

Michael de Potestate Leodius-5-=

Gilbertus Petrus de Hemonde Leodius-5-=

Emmanuel del ……….. [1647], advenit marchio de Castel-Rodrigo, gubernator Belgii-5-@

Hubertus Richardy Hannoniensis-5-#

Jacobus Della Faille Bruxellensis-5-*

Hubertus de Lapide Leodius-5-=

Ignatius Jacob de Muelenaere de Bruges-5-*

Lambertus de Sougne Leodius-5-=

Gisbertus Conventinus in Lovaniensi professor Leodiensis. *† à Orléans le 14 octobre 1648*-5-=

Petrus de Rutere Brouck Burganus-5-+

Carolus Artus a Marka baro d’Othee Leodiensis-5-=

Joannes Baptista Michiels Brugensis-5-*

Gerebrandus Frederix Brabanson d’Anvers-5-*

Servatius Crassier dominus de Rondchaine Leodius-5-=

Ogerius Descouleurs Atrebas-5-+

Jacobus Descouleurs Atrebas-5-+

Rubertus Stoet Franco-Brugensis-5-*

Carolus Boneem Franco-Brugensis-5-*

Joannes Jacobus Beeckman Leodius. *Décédé le 7 juin 1650*-5-=

Emanuel Bailly Leodius-5-=

Nicolaus de Douay Atrebatensis-5-+

Ignatius Boudart de Warlincourt-5-+

Antonius de Belvalet Fammechon Atrebas. *Décédé à Orléans le 15 mai 1650*-5-+

Joannes Franciscus le Prevost Atrebatensis-5-+

Joannes Baptista van Woestwynckele Brugensis-5-*

Johannes Levra Cameracensis-5-+

Dionisius de Marets Leodicensis-5-=

Petrus Franciscus Gregoire Attrebatensis-5-+

Joannes Bourdon Cameracensis-5-+

Michael Gelis (Selis) Leodius-5-=

Joannes Philippus de Boneem Franco-Brugensis-5-*

Franciscus de Conincq Brugensis-5-*

-5-Belgique, Luxembourg, France

Flandre-Brabant-5-*

Liège-5-=

Hainaut-Namur-Luxembourg-5-#

Artois-Flandre gallicane-5-+

gouverneur des Pays-Bas espagnols-5-@

1651-1660

Petrus Massetz Leodius-5-=

Ludovicus de Lassenolle Leodius-5-=

Joannes Baptista de Hemonde Leodius-5-=

Jan François Ymmeloot Flander-5-*

Egidius de Harenne Leodiensis-5-=

Ægidius du Sart Leodius-5-=

Petrus Moleus Leodius-5-=

Carolus van der Meersch Burburganus Flander-5-+

Nicolaus de Stockhem Leodius-5-=

Guillielmus baro de Horion Leodiensis-5-=

Hermannus Franciscus de Trappé Leodius-5-=

Edmundus Omalius Leodius-5-=

Gregorius de Weerdt Antverpiensis-5-*

Ernestus Hieronymus de Nuvolara Leodius-5-=

Henricus Malaese Leodius-5-=

Lambertus Detriché Leodius-5-=

Petrus Woot (Voost) Leodius-5-=

Rochwyn Loovens Brabantinus-5-*

Cornelius de Beveren Belga [?]-5-*

Joannes Cools Tescendeloensis ex patria Leodiensi-5-=

Jan Meyer van Eppengnie [?]-5-#

Petrus Ballendoncq Antverpiensis-5-*

Ludovicus Franciscus de Felleries Monnomontanus. *Décédé le 22 octobre 1658*-5-+

Joannes de Austria, pro Hispaniarum rege in Belgio gubernator, 1659-5-@

Joannes Gaen Leodius-5-=

Natalis de Villenfaigne Dionanto-Leodiensis-5-#

Joannes Boesman Leodius-5-=

Lambertus de Lametz Leodius-5-=

Joannes Petrus de Buel Leodius-5-=

Rinaldus Hugens Antverpiensis-5-*

Petrus Poncelet Leodius (gratis est immatriculatus)-5-=

Godofridus Snyers Antverpiensis-5-*

Joannes Baptista de Crits Brugensis-5-*

J.P. Dansart ex Flandria Wasianus-5-*

Guilielmus Robert ex Flandria-5-*

Ludovicus de Bargibant Tornacensis-5-#

Marcus Antonius de Bargibant Tornacensis-5-#

Franciscus van Geitens Bruxellensis-5-*

Joannes Baptista Ludovicus van der Noot Bruxellensis-5-*

Hieronymus de Gaule Bruxellensis-5-*

Albertus Leonardus de Lymborch Leodius-5-=

Franciscus de Muelenare Brabantus

Philippe Dominique Delespau Robacensis-5-+

Joannes Edmundus Louroux Leodiensis-5-=

-5-Belgique, Luxembourg, France

Flandre-Brabant-5-*

Liège-5-=

Hainaut-Namur-Luxembourg-5-#

Artois-Flandre gallicane-5-+

1661-1670

Guilielmus de Boodt Flandria-5-*

Wolfgangus Wielelmus van der Haghen Brugensis-5-*

Arnoldus Goddin Leodius (cathedralium ecclesiarum Lovaniensium canonicus)-5-=

Franciscus Wolff ex Tectis, dioce(n)sis Leodiensis-5-=

Carolus van Hoobrouck Gandensis-5-*

Festin [?] Tacquet Brugensis-5-*

Albertus van Ghindertaelen Bruxellensis-5-*

Franciscus Aloysius van Meersche Gandensis-5-*

Engelbertus (*ou* Josephus) Boesman [?] Leodius-5-=

... Schoore Flamand-5-*

A. Anchement seigneur de Marcque Flamand-5-*

Joannes de Charneux Liegeois-5-=

Petrus Albertus de Lindick Bruxellensis-5-*

Petrus de Groote Gandavensis Flander-5-*

Alexander de Groote Drunier Brugensis Flander-5-*

Jacobus Couvrechef Antverpiensis-5-*

Franciscus de Brune Francobrugensis-5-*

Ludovicus le Poivre Francobrugensis-5-*

Conrarde De La Haxhe Liegois-5-=

Jacobus Taffin Audomarensis-5-+

Baron de Male Brugensis-5-*

Arnoldus Hoeuft Rotomagus-5-+

Guiliellmus Franciscus van den Werve Liranus-5-*

Joannes Guilielmus Des Champs Antverpiensis-5-*

Thomas van Eynden Antverpiensis-5-*

Theodorus van den Werve Antverpiensis-5-*

Franciscus De Moulde Brugensis-5-*

Joannes Franciscus van Peenen Brugensis-5-*

Ignatius Cardon Lovaniensis-5-*

François … [*deux lignes noircies et illisibles*] [?]

Joannes Caroly Leodiensis-5-=

Carolus Ignatius Cloissone Gandensis-5-*

François van der Haghen Brugensis-5-*

Gabriel de Coppiny Mechliniensis-5-*

Franciscus Clerx Leodius-5-=

Pasquasius Daubespin Stabulensis-5-=

Jacobus van Rouuerge [?]-5-+

Michael Franciscus de Selys Leodiensis-5-=

Jacobus Ignatius Durlens Cardesiensis [?]-5-+

Augustinus Marlier Hanno-Montanus-5-#

Joannes Franciscus Mahieu [?]-5-*

Carolus Albertus van der Beken Montensis [?]-5-#

Carolus Hueribloc Brugensis ex Flandria-5-*

Henricus de Vorst Flander-5-*

Albertus Imbert de la Falceque Insulensis-5-+

Jacobus Jordaens Antverpiensis-5-*

Philippus Hyacinthus de Deckere Antverpiensis-5-*

Petrus le Vasseur Atrebatensis-5-+

Johannes Baptista Taniel Insulensis (*lecture difficile*)-5-+

D. Walterus Lambertus ab Hinnisdael eques Leodius-5-=

Winandus ab Hoven Mechelensis (gubernator [dominorum] a Franquenstein)-5-*

Philip Sproncholt Brusensis-5-*

Joannes Hocx Huensis Leodiensis-5-=

Franciscus Cardoy Insulensis-5-+

Franciscus de Semittre Insulensis-5-+

Nicolaus Antonius de Jonge Distsis [?]-5-*

Philippus Rolans Leodius-5-=

Joannes Philippus van Diependael Antverpiensis-5-*

Vincentius de La Hamaide Leodiensis-5-=

Franciscus Damianus Wilhelmus de Bourscheidt de Bourgbroll-5-#

Joannes Ludovicus de Boroy Leodiensis. *Décédé à Orléans le 18 octobre 1667*-5-=

Jacobus Laurentius de Wandre Leodiensis-5-=

Petrus Mercier Leodius-5-=

Joannes Jacobus Umbscheiden Luxenburgensis-5-#

François Rovers Leodius-5-=

Lambertus Masuir Leodius-5-=

Theodoricus Bronchartz Leodius-5-=

Hubertus van Vucht Trudonensis-5-*

Ignatius Cardoy Insulensis-5-+

Simon le Pippre Insulensis-5-+

Henricus Antonius van Berchem Antverpiensis-5-*

Carolus Ludovicus Ogier Leodius-5-=

Nicolaus Franciscus de Fourmentau Insulensis-5-+

Jacobus de Fays Leodius-5-=

Rene de Mol baron de Herent-5-*

Franciscus van Calloen Flandrus-5-*

Joannes Jacquesse Luxemburgensis-5-#

Jacobus Ju[doc]us Danneels Gandensis-5-*

Josephus de Corte Bruxellensis-5-*

[Petrus] de S. George Leodius. *Décédé à Orléans le 10 mai 1670*-5-=

Henricus de Salms Leodius-5-=

Bartholomæus de Massetz Leodiensis-5-=

Petrus Wapenaert ex Sinay in Wasia-5-*

Theodorus van Goethem Gandensis-5-*

Franc. Bonnaventura Gambart de Camb[art] [?]-5-+

Fredericus Antonius van Heymbeke Bruxellensis-5-*

Andreas Balduinus Fabry Leodius-5-=

J[oannes] J[acobus] de Put Bruxellensis-5-*

Guilielmus van der Voort Belga [?]-5-*

Stephanus Wten Leodius-5-=

-5-Belgique, Luxembourg, France

Flandre-Brabant-5-*

Liège-5-=

Hainaut-Namur-Luxembourg-5-#

Artois-Flandre gallicane-5-+

1671-1680

Henricus Ignatius van Bueren Antverpiensis-5-*

Jacobus Franciscus van Steens Gandensis-5-*

Petrus Josephus D’Alleux Bruxellensis-5-*

Cornelius van der Heyden Antverpiensis-5-*

Franciscus Gouverneur Leodius-5-=

Leopoldus Bonhome Leodius-5-=

Adamus Mercier Leodiensis-5-=

J.C.L. De Charneux Leodiensis-5-=

Guilielmus Gielis dit Huiuweel [Bruxellensis]-5-*

Philippus Franciscus de Fourneau [de la Chapelle] Antverpiensis-5-*

Henricus Theodorus de Fourneau Antverpiensis-5-*

Petrus de Croix dominus Defferrans Valecenensis-5-+

Guerardus Franciscus Gielis Huiuweel Bruxellensis-5-*

Franchois van Caloen Franconatensis-5-*

Franciscus Jacobus Hillewerve Antverpiensis-5-*

Albertus Debonnaire Gallo-Flander Insulanus-5-+

Le chevalier de Martinsart Insulanus.-5-+

Petrus de Simonis Leodius-5-=

[Joannes] Guillielmus vander Heyden a Blisia Leodius-5-=

Joannes Franciscus De Thier Leodius-5-=

Ferdinandus Moreau Leodiensis ex Berlo-5-=

Hubertus du Fourneau Leodius-5-=

Anthonius Ollivier Rupefortensis-5-#

Joannes Hubertus Tignee Leodius-5-=

Dionysius Christophorus Ursinus Leodius-5-=

Carolus Adrianus de Croix de Preseau Insulensis-5-+

Guillielmus Le Leu Insulensis-5-+

Henricus Muyllart (Muissart), Insulensis-5-+

Eugenius du Bois Insulensis-5-+

Rogerius Douchez Cortracensis-5-*

Ignatius Franciscus Bailan Tornacensis-5-#

Johannes Philippus de La Tour eques Leodius-5-=

Franciscus Fasse Insulensis-5-+

Cornelius Zegerus Zeghers Antverpiensis-5-*

Jacobus Fredericx Antverpiensis-5-*

Vincentius du Moulin Leodius-5-=

Franciscus Josephus du Chasteau Insulensis-5-+

Allardus Antonius Bave Insulensis-5-+

Joannes Philippus Doffus Bruxellensis-5-*

Laurentius Blisia Leodius-5-=

Philippus Franciscus de Gherbode Werviacensis (Insulensis)-5-+

Ludovicus Collage Gandensis-5-*

Hermannus Henricus Eugenius d’Ogier Leodius-5-=

Joannes Carolus Ghesquieres Leodius-5-=

Emanuel Fredericus de Vooght Brugensis eques-5-*

Christianus van Roosendael Bruxellensis-5-*

Jean-François Munier Bruxelles-5-*

Ignatius Vincentius Emanuel Della Faille Antverpiensis-5-*

-5-Belgique, Luxembourg, France

Flandre-Brabant-5-*

Liège-5-=

Hainaut-Namur-Luxembourg-5-#

Artois-Flandre gallicane-5-+

1681-1689

Antonius de Succa Leodius-5-=

Robertus Danel Brugensis-5-*

Joannes Florimundus d’Horenbeque Antverpiensis-5-*

Joannes Franciscus Mariot Leodiensis-5-=

Petrus Franciscus Lemaitre Leodius-5-=

Ignatius Henricus Theodorus ab Horst [?]-5-*

Waltherus a Selys Leodius-5-=

Petrus Franciscus de Mey Gandensis-5-*

Henricus Gaultier D’Izier Insulensis-5-+

Petrus van der Maer de Carnain Flander Insulensis-5-+

Petrus de la Haye des Roseaux Flander Insulensis-5-+

Jacobus Philippus Grassis du Burgault Insulensis-5-+

Philippus Bonaventura du Beron d’Estombe Insulensis-5-+

Petrus Deliot ecuier et seigneur De la Croix Insulanus-5-+

Lauren Robyns Lossensis, diocesis Leodiensis-5-=

Joannes Robertus de Roncq Insulensis-5-+

Franciscus Judocus Soutart (Zoutart) Gandensis-5-*

Henricus Franciscus Des Brassinnes Leodius-5-=

Mathias D’Ans Leodius-5-=

Philippus van Buel Leodius-5-=

Joannes Guilhelmus De Requile Leodius-5-=

Gerardus Martinus Charle Leodius-5-=

Joannes Franciscus Canto Leodius-5-=

Balduinus Garitte Leodius-5-=

Erasmus de et in Tharoullet in Betendorf Leodius-5-=

Claudius Isaece Montensis (A.D.L., D 243, p. 6r)-5-#

Arnoldus Franciscus Beckers ex Grevenbroeck in comitatu Lossensi-5-=

Jacobus Henricus Claessens Maeseyckensis, dioecesis Leodiensis-5-=

Petrus Namur Leodius-5-=

Joannes Baptista Omalius Leodius-5-=

Bernardus Alexander van den Dype (Sype) Mechliniensis in Brabantia-5-*

Joannes Franciscus Philippus van den Hore Diestensis in Brabantia-5-*

Carolus de Truf (Xruf) Gandensis-5-*

Carolus van der Haeghe Gandensis-5-*

Leon Mahieu Gandensis-5-*

Carolus Cocle Iprensis-5-*

-5-Belgique, Luxembourg, France

Flandre-Brabant-5-*

Liège-5-=

Hainaut-Namur-Luxembourg-5-#

Artois-Flandre gallicane-5-+

1721-1781

Franciscus Demomet des Farges Avranciensis d[iocesis]-5-+

Adrianus Xaverius Ghellinck dominus in Reynsackero in Elseghem, etc., Cortracensis-5-*

Egidius Beuvet dominus Deberghe Insulensis-5-+

Joannes Josephus Fruict Insulensis-5-+

Joannes Baptista Ghellinck dominus in Cranenbrouck in Halle, Cortracensis-5-*

Carolus Cubertus Duchambge dominus in Noielles Insulanus-5-+

Jean Barthelemy Collinet de Liege-5-=

Ludovicus Hippolitus Josephus Dragon de Roncq Insulanus diocesis Tornacensis-5-+

Jacobus Adrianus d’Haffrengues de Lannoy Insulanus, diocesis Tornacensis-5-+

Gislenus Franciscus Josephus Obert de Lassus Insulanus diocesis Tornacensis-5-+

Ludovicus Franciscus Josephus d’Haffrengues de Labrique Insulanus diocesis Tornacensis-5-+

Joannes Hubertus Gilman canonicus Sancti Pauli Leodiensis-5-=

Gosvinus Casimirus Josephus d’Ancion Leodius-5-=

Ignatius Josephus Cardon de Beaufremez Insulanus diocesis Tornacensis-5-+

Gabriel Eubertus Josephus Scherer de Scherbourg Insulanus diocesis Tornacensis-5-+

Adrianus Franciscus Philippus Delisle Insulanus diocesis Tornacensis-5-+

Carolus Josephus Vandermaer de Lille diocesis Tornacensis-5-+

Petrus Gislenus Josephus Jolly [de Lavieville} Bethuneus diocesis Atrebatensis-5-+

Ludovicus Franciscus Josephus Moveque Desmesures Insulanus diocesis Tornacensis-5-+

Franciscus Josephus Clemens Duretz Degrandmaretz Insulanus diocesis Tornacensis-5-+

-6-Danemark, Norvège, Suède

Danemark-6-*

Norvège-6-+

Suède-Finlande-6-=

1602-1610

Georgius Schougaurd Danus de Gunderstrup-6-*

Nicolaus Johannes Jegerus Hafniensis Dahus-6-*

Chilianus Krabbe Dahus-6-*

Joannes Nicolaus Holmius Danus Cymber-6-*

Ericus Brahe Steno Danus-6-*

Georgius Brahe Steno Danus-6-*

Falcho Brahe Danus-6-*

Wulffgangus Rhumannus Danus-6-*

Georgius Rostrup Danus-6-*

Gundæus Rostrup Danus-6-*

Fridericus Retzius Danus-6-*

Nicolaus Friiss Odresæ Danus-6-*

Christophorus Friiss Danus-6-*

Tycho Langhe Danus-6-*

Stheno Rosenspar Danus-6-*

Gulhielmus Corvinus Danus-6-*

Ericus a Rantzow Danus-6-*

Fridericus Leyl (Leyen) Helsengorensis Danus-6-*

Suante Sture Suecus-6-=

Suanto Stenbock Suecus-6-=

Petrus Hundermarck Danus-6-*

Petrus Stygge Danus-6-*

Jacobus Bonde Danus-6-*

Petrus Galthius Danus Nicolai filius-6-*

Ivarus Bryske Fyonus Danus-6-*

Johannes Michaelius Otthoniensis Danus-6-*

Claus Rosa-cranzius Danus-6-*

Hartvicus Lindennou Danus-6-*

Fridericus Frisius Danus-6-*

Johannes Olaj Danus-6-*

Christophorus Dibuadius, medicinae doctor, Danus-6-*

Christianus Thomae f[ilius] vom Mantiszum Danus-6-*

Petrus Langhe Danus-6-*

Jacobus Falsterus Kippingensis Danus-6-*

Petrus Andreæ Bulth. Gothus-6-=

Tycho Sandberg Danus-6-*

-6-Danemark, Norvège, Suède

Danemark-6-*

Norvège-6-+

Suède-Finlande-6-=

1611-1620

Tycho Brahæus Danus-6-*

Esbernus Halvegius Roschil-Danus, medicinae doctor-6-*

Manderopius de Appelgaardt Danus-6-*

Petrus Adolphus Norvegus-6-+

Edoarus de Barden Norvegus-6-+

Andreas Andræa Buckius Danus-6-*

Magnus Lycke Danus-6-*

Magister Petrus Nicolaus Gælstrupius Danus-6-*

Johannes Andreas Tausanus Danus-6-*

Severinus Andreas Vellejus Cimber-6-*

Nicolaus Fries Danus-6-*

Gregorius Krabbe Danus-6-*

Johannes Laurent Blixius Norvegianus-6-+

Nicolaus Laurentii Wlpitius Danus-6-*

Georgius Wind Danus-6-*

Nicolaus Arnfeld Danois-6-*

Nicolaus Wilhelmius Danus Haffniensis-6-*

Heinricus Podbusch Danus-6-*

Nicolaus Busch Ringopoli-Cimber-6-*

Burchardus Rhudt Danus-6-*

Johannes Birchittus Danus-6-*

Janus Bille Danus-6-*

Canutus Wllffeldius Danus-6-*

Jacobus Wllffeldius Danus-6-*

Henricus Rantzovius Danus-6-*

Franciscus Wllffeldius Danus-6-*

Nicolaus Fossius Danus-6-*

Olaus Jacobæus Danus [*nom biffé*]-6-*

Petrus Wlfeldius Danus-6-*

Laurentius Wllffeldius Danus-6-*

Cornificius Wllffeldius Danus-6-*

Daniel Bildt Norwegus a Lungard-6-+

Christophorus Laurent[ius] Frisius Fioni-Danus-6-*

Georgius Kruusse Danus-6-*

Otto Kruusse Danus-6-*

Tycho Kruusse Danus-6-*

Michael Mauritius Norwegus-6-+

Jacobus Finckius Hafnia-Danus-6-*

Magnus Sestett Danus-6-*

Johannes Resenius Hafnia-Danus-6-*

-6-Danemark, Norvège, Suède

Danemark-6-*

Norvège-6-+

Suède-Finlande-6-=

1621-1630

Nicolaus Sys Danus-6-*

Antonius Boeker Hafnienssis Danus-6-*

Johannes Boecker von Delden Haffnia-Danus-6-*

Georgius Boekerus Haffniensis Danus-6-*

Fridericus Andreæ Fridericiburgensis Danus (hic 3 julii [1644] Aureliae mortuus est)-6-*

Ivarus Krabbe Danus-6-*

Nicolaus Krabbe Danus-6-*

Christianus Sinclar Danus orientalis-6-*

Abrahamus Meckelburg Danus-6-*

Hansz Niklas Lundt Danus-6-*

Johannes Willeman Finno-Suecus-6-=

Anthonius Willeman Finno-Suecus-6-=

Canutus Wlfeldius Chr. f[ilius] n[obilis] Danus-6-*

Bartholomæus Georgius Danus-6-*

Severinus Nicolaus Haffman (Hoffman) Danus-6-*

Jacob von Randersen-6-*

Petrus Lasson Randrusio-Danus-6-*

Cum intellexissem legatum regis Sueciae advenisse in hanc urbem, 17-8-[1630]-6-=

Henricus Ickingius Asloja Norvegus.-6-+

-6-Danemark, Norvège, Suède

Danemark-6-*

Norvège-6-+

Suède-Finlande-6-=

1631-1640

Nicolaus Bentzon de Rhanderhusen-6-*

Georgius Rosencrandtz Danus-6-*

Martinus Gronnenbergus Suecus-6-=

Didericus Gronnenberg Suecus-6-=

Carolus de Besche Swecus-6-=

[Laurentius de Geer Dordraco-Hollandus]-6-=

Gabriel Goldenanker Suecus-6-=

Johannes Rosenhan Suecus-6-=

Petrus Gavelius Suecus-6-=

Haraldus Appelbom Suecus-6-=

Ovenius Ulfeldt (Wlfeldt) n[obilis] Danus [dominus in Svenstrup]-6-*

Nicolaus Kaas n[obilis] Danus-6-*

M. Johannes Petræus Calunda-Danus-6-*

Petrus Ivari Havnia-Danus-6-*

Daniel Figrelius Suecus-6-=

Georgius Kaas Danus-6-*

Biorno Kaas Danus-6-*

Johannes Kaas Danus-6-*

Johannes Petrejus Otthonia-Danus-6-*

Gustavus Rosenhane Suecus-6-=

Tycho Below Danus-6-*

Matthias Mylonius Suecus-6-=

Joannes Casimirus Poloniae Sueciaeque princeps-6-=

Laurentius Below Danus [dominus in Spötrup]-6-*

Fridericus Below Danus-6-*

Petrus Jonas Charisius Haffnia-Danus-6-*

Christianus Noldius Danus-6-*

Franciscus Rantzow de Estwadgaard Danus-6-*

Magnus Gyldenstiern de Søhelm Danus-6-*

Vitus Petri Bering Viburgo-Danus-6-*

Bartolus C. Bartholinus n[obilis] Danus-6-*

Theodorus Fuiren n[obilis] Danus-6-*

-6-Danemark, Norvège, Suède

Danemark-6-*

Norvège-6-+

Suède-Finlande-6-=

1641-1650

Thomas Bartholinus Hafniensis Danus-6-*

Ericus Holck dominus de Hasdorf n[obilis] Danus-6-*

Petrus Georgius Obellius Danus-6-*

Louvis Michael Othoniensis Danus-6-*

Nicolaes Parsberg Danus-6-*

Petrus Burgerus Cimbro-Danus-6-*

Ivarus Hilarii Schelerus n[obilis] Danus-6-*

Jacobus Erasmius Studt Nort-Bergensis-6-+

Otto Erasmius Studt Nort-Bergensis-6-+

Georgius Bielke n[obilis] Norvegus-6-+

Hermannus Bielke n[obilis] Norvegus-6-+

Petrus Juell Danus-6-*

Christianus Brodt Danus-6-*

Claudius Sparre nob[ilis] Danus-6-*

Martinus Pauli Grum Danus-6-*

Severinus Joannes Bentzon Danus-6-*

Vitikindus Husius Norwegus-6-+

Ericus Hardenberg Gyldenstiern Danus-6-*

Bartholus Loxdorphius Danus-6-*

Joannes Hiermannus Danus-6-*

Marcus Rodtstein Pall Danus-6-*

Antonius Jull n[obilis] Danus-6-*

Laurentius Bordingius Aarhusio-Danus-6-*

Ludovicus Pouchius Ripensis Cimber-6-*

Christianus Dop Haff[nia]-Danus-6-*

Claudius Juull eques Cimber-6-*

Magnus Gabriel de La Gardie comte de Lecköö-6-=

Michael Johannis Michaelius Otthonia-Danus-6-*

Joannes Per Duns Randerhusiensis Danus-6-*

Christiernus Schiel Georgides [Danus]-6-*

Accilius Brahe [Danus]-6-*

Nicolaus Johannes Ruth Suecus-6-=

Ovenus Thott Danus-6-*

Fridericus de Barnewitz Danus-6-*

Axilius Rosencrantz Danus-6-*

George Daa Danus-6-*

Georgius Rets nobilis Danus-6-*

Tycho Kruusse T. f[ilius] Danus-6-*

Magnus Kruusse Danus-6-*

Erasmus Hammerus Danus-6-*

Martinus Rosenstiern Suecus-6-=

Axelius Sehestius Danus-6-*

Johannes Helverschou Danus-6-*

Nicolaus Bordingius Danus-6-*

Christianus Sparre Danus-6-*

Jacobus Otthonius Danus-6-*

Brostrop Gedde Norvegus-6-+

Christianus Matthiae Lundius Danus-6-*

Petrus Laurentii Scavenius Danus-6-*

Christianus Barnekov Danus-6-*

Christianus Wrne Danus-6-*

Johannes Faber Danus-6-*

Christianus Wivel (Vind) Danus-6-*

Johannes Claudius Mulenius Danus-6-*

Christophorus Wlfeldt Danus-6-*

Casparus Bartholinus Danus, J.U.D.-6-*

Ottho Lindenow Danus-6-*

Christianus Lindenow Danus-6-*

Henricus Juell Danus-6-*

Christianus Schöning Danus-6-*

Petrus Ostenfeldt Danus-6-*

Martinus Laurentii Scavenius Hafnia-Danus-6-*

Nicolaus Kruse Danus-6-*

Haraldus Erici Oxe Westrogothus Suecus-6-=

Erich Loodh aus Suedhen in Smålandt-6-=

Sveno Kaptli auss Sueden Vestrogothus-6-=

Wilhelm Daniesen (Davieson) Stokholm Suecus-6-=

Corfitius Rosenkrantz Danus-6-*

Joannes Got: Warbierus Danus-6-*

Nicolaus Kaas Danus-6-*

Eric Bille eques Danus-6-*

Jacobus Bille eques Danus-6-*

-6-Danemark, Norvège, Suède

Danemark-6-*

Norvège-6-+

Suède-Finlande-6-=

1651-1660

Corfitz Trolle Danus-6-*

Bartholus Aquilonius Schano-Danus-6-*

Marcus Rothsteen Danus-6-*

Jacob Rothsteen Danus-6-*

Joannes Rothsten Danus-6-*

Joannes Huass: Christophori Danus nobilis-6-*

Severinus Matthias Masze Hafnia-Danus-6-*

Tago Krabbe eques Danus-6-*

Georgius Krabbe Danus-6-*

Erasmus Randolf Danus-6-*

Nicolaus Randolf Danus-6-*

Johannes Oldeland eques Danus-6-*

Henrich Marchdanen Danus-6-*

Christian Uldrich Steno Danus-6-*

Jacobus Friiss e[ques] Danus-6-*

Ericus Bilde Danus-6-*

Enowaldus Bilde Danus-6-*

Martinus Schenkell Nicolai eques Danus [in Søholm]-6-*

Wilhelmus Mulenius Danus-6-*

Nicolaus Brahe comes de Wisingsborg-6-=

Carolus Tungell nobilis Suecus-6-=

Nicolaus Tungel nobilis Suecus-6-=

Martinus Brenner Suedois-6-=

Johannes Steno eques Danus-6-*

Canutus Steno Danus-6-*

Henningius Valckendorff eques Danus-6-*

Joannes Wind Danus eques-6-*

Joachimus Fridericus Wind eques Danus-6-*

Severinus Schievving Danus-6-*

Henricus Aschylli Gioë eques Danus-6-*

Henricus Gioë Falconis f[ilius] eques Danus-6-*

Marcus Gioë Falckson eques Danus-6-*

Otto Canuti f[ilius] Seeblat Ottoniensis Danus-6-*

Johannes Detlefius Steno-Danus-6-*

Erasmus Anderslohnius Fridrichsstadio-Nortwegus-6-+

Hilarius Steno eques Danus-6-*

George Rosencrantz Gundæi Danus-6-*

Nicolaus Juell Axilii filius Danus-6-*

Joannes Wrne Sib. [f]il. Danus-6-*

Laurentius Gabriel Danus-6-*

Otho Schiel SY nobilis Danus-6-*

Michael Matthiæ Vibe Danus-6-*

Joannes Julby Danus-6-*

Naaman Bensen Strandfrisius Cimber-6-*

Wilhelm Hennisch Danus-6-*

[Christina]: adventus serenissimae Suecorum reginae, 6 octobris [1657]-6-=

Andreas Caspari Engbergius natione Danus Falsterus-6-*

Rudbeck von Ditthen Danus-6-*

Thomas Nascho Danus-6-*

Ovenus Ramel Danus-6-*

Jacobus Trolle nobilis Danus-6-*

-6-Danemark, Norvège, Suède

Danemark-6-*

Norvège-6-+

Suède-Finlande-6-=

1661-1670

Nicolaus de Brobergue Danus Cimber-6-*

Matthias Worm Olai f]ilius] Haffnia Danus-6-*

Nicolaus Frischerus Danus-6-*

Henricus Gyldenstiern Danus-6-*

Petrus Windingius Joan. f[ilius] Danus-6-*

Dancretus Petri Gruner Hafnia Danus-6-*

Christianus Stochfledt Norvegus-6-+

Marcus Bahrnholt Norvegus-6-+

Hans von Lossow Jacobson Jutland-Danus-6-*

Emmichius Andreae Nedergordius Cimber-6-*

Justinus Dyssell-6-*

Johannes Kaas Danus-6-*

Nicolaus Kaas Danus-6-*

Rudbeck Gagge Danus-6-*

Gustavus von Kleberfeld Suecus-6-=

Johannes Hopner Danus-6-*

Henningus Mejer (Meyer) Haffnia-Danus-6-*

Henricus Stalhausen Suecus-6-=

Erich Reuter Suecus-6-=

-6-Danemark, Norvège, Suède

Danemark-6-*

Norvège-6-+

Suède-Finlande-6-=

1671-1680

Johannes Frisius Sigfridi f[ilius] Hafnia-Danus-6-*

Johannes Adolphus Bornemann Hafnia-Danus-6-*

Petrus Worm Olai f[ilius] Huernia-Danus-6-*

Joannes Szöge eques Polonus (A.D.L., D 243, p. 5v: J. Szoege Danois-6-*)

Johannes Worm Olai f[ilius] Hafnia-Danus-6-*

Olaus Schelderupius Jani f[ilius] Berga-Norwegus-6-+

Johannes Lambertus Liemius Danus-6-*

Jacques Daurez Holmiensis-6-=

Martinus Rosenstand Cimber Danus-6-*

Petrus Rosenstand Danus-6-*

Johannes Benzon H[afnia]-Danus-6-*

Johannes Ehm Haffniensis-6-*

Ludovicus de Geer de Kyrhuyse-6-=

Christian Lasson Danus-6-*

Laurentius Jacobssen Norwegus-6-+

-6-Danemark, Norvège, Suède

Danemark-6-*

Norvège-6-+

Suède-Finlande-6-=

1681-1689

Luxdorph rgsit (eques ou consiliarius) Danus-6-*

Henricus Helwerschow Haffniensis-6-*

Heynricus Adelar Norvagus-6-+

Trugver Spormand Danus-6-*

Christian Tuxen Danus-6-*

Albertus Angel Noervegus-6-+

Sigvardus Friis Christ. f[ilius] Danus-6-*

Olaus Lassonius Arhusio-Danus*. Décédé le 3 décembre 1684*-6-*

Casparus E. Bartholinus Hafnia-Danus-6-*

Canutus Rodstheen nobilis Danus-6-*

Severinus Bors Norvegus-6-+

Christophorus Lunt Danus-6-*

Christianus Leegardus Danus-6-*

Severinus Casparus Hiordt Hafnia-6-*

-6-Danemark, Norvège, Suède

Danemark-6-*

Norvège-6-+

Suède-Finlande-6-=

1721-1781

-----------------------------

-7-France : Alsace, Lorraine, Franche-Comté

Lorraine-7-*

Alsace-7-+

Franche-Comté-7-=

1602-1610

Elias Schiller Marchiobadensis Alsatius-7-+

Georgius de Foes Mediomatricus-7-*

Claudius Saracenus Lotharenus Samiellanus-7-*

Magister Theobaldus Kieffer Altkirchensis-7-+

Casparus Bitsch Hagenoënsis Alsaticus, praeceptor comitum de Erbach (Erpach) et de Waldec-7-+

Melchior Sebizius Argentinensis-7-+

Johannes Hartmannus a Flachslandt Sungovius-7-+

Melchior Anthonius Camj ab Herzberg comitatus Ferretensis-7-+

Johannes Ernestus a Berstett-7-+

Nicolaus Baillivius Nanceianus-7-*

Joannes Jacobus a Kippenheim Argentinensis-7-+

Johannes Daniel Wurmser Argentinensis-7-+

Joannes Christophorus Eckbrechtus a Dürckheim Alsaticus-7-+

Henricus Eckbrecht a Dürckheim-7-+

Johann Casimir von Rixingen-7-+

Johannes Ulricus Scheidt Argentinensis-7-+

Joannes Jacobus Mitterspach Hagenoensis-7-+

Laurentius Langius Tavernensis Alsatiae, dyocoesis Argentinensis-7-+

Christophorus a Schauenburg Alsata, Basiliensis episcopatus-7-+

Valentinus Bart Colmariensis-7-+

Laurentius Bossius Biblisheimensis Alsatus-7-+

David Röttlin Reichwilensis Alsatus-7-+

Benignus Bernardus V…….[*nom raturé*] (hic cum Gallus esset natione)-7-*

Dionysius de Valimbert Vesontinus-7-=

Rudolphus Wilhelmus a Kagenneckh Kienshemi, dioecesis Basiliensis-7-*

Johannes Georgius Sebizius Argentinensis-7-+

Joannes Baptista Varinus Bisuntinus-7-=

Georgius Humbertus a Reynette-7-*

Georgius Theodoricus a Wangen et Geroltzeck ad Wasgoram natione Germanus Alsata-7-+

Daniel Cachedenier Nicæius Barroducæus-7-*

Johannes Adamus a Reinbut Haganoensis-7-+

Alexander Lettret Vesuntinus Burgundus-7-=

Johannes Sebastianus Zeyssolff Argentinensis-7-+

Joannes Joachimus Fuchs Argentinensis-7-+.

Leodegarius Mafsye (Mafzé) [Tannensis] Alsata-7-+

Jean Nyon, bedeau de la nation de Lorraine, 28 septembris-7-*

Johannes Jacobus Ritter Argentinensis-7-+

Joannes Brantzius Argentinensis Alsatus-7-+

Georgius Rivius Lotharingus-7-*

Fridericus Engelman Argentinensis Alsata-7-+

Johannes Jacobus Taurellus Colmariensis-7-+

Melchio[r] Antonius a Breitten Landenberg-7-+

Israel Dieffenbecher Argentinensis-7-+

Joannes Georgius Wurmser-7-+

Jacobus Rutandus Samielanus Lotharingus-7-*

Nicolaus Petitgot Tullensis Lotharingus-7-*

Claudius Pelletier Chamensis Lotharingus-7-*

Clemens Clemens Chamensis Lotharingus-7-*

Nicolaus Parisot Visiliensis Lotharingus-7-*

Antonius Daslaincourt Lotharingus Nanceyanus-7-*

Andreas Philbertus Lotharingus Nanceianus-7-*

Sebastianus Müllerus Argentinensis-7-+

Johannes Georgius a Seebach Alsatus-7-+

Wolfgangus Theodericus Zorn Alsatus-7-+

Wendelinus Gyntzer Colmariensis Alsata-7-+

Joannes Jacobus ab Andlaw Ensishemianus-7-+

Balthasar ab Andlaw Ensishemianus-7-+

Joannes Götz Neovillanus Alsata-7-+

Andreas Drens Argentinensis-7-+

Johannes Ludovicus Mieg a Bofftzheim Argentoratensis-7-+

Wolffgangus Ludovicus Bock a Blaessheim-7-+

Paulus Mieg a Bofftzheim-7-+

Simeon Wild Ensisheimensis Alsata-7-+

Jacobus Butandus Lotharingus Saloniensis-7-*

Franciscus Caboche Lotharingus Nanceyanus, philosophiae baccalaureus-7-*

Mathæus Philbertus Lotharingus Nanceianus-7-*

Joannes Chaligotius Lo(n)taringus Samiellanus-7-*

Joannes Jacobus Saltzmann Argentinensis-7-+

Joannes Wandsteinger Lotharingus [*nom raturé*]-7-*

Philippus de Rixingen Alsata-7-+

Ludovicus Emichius a Rixingen-7-+.

Joannes Federicus de Valimbert Bisuntinus-7-=

Christophorus Brunius Badenvillensis-7-*

Philippus Brunius Badenvillensis-7-*

Eustachius Lescuyer Solranus (Solgne ?)-7-*

-7-France : Alsace, Lorraine, Franche-Comté

Lorraine-7-*

Alsace-7-+

Franche-Comté-7-=

1611-1620

Philippus Marie Divionensis-7-=

Carolus Christianus de Gournay de Genicourt Nanceyanus, dioecesis Tullensis-7-*

Carolus Bousniard Samiellanus, dioecesis Virdunensis-7-*

Carolus Nicolaus de Lory Mussipontanus, dioecesis Metensis-7-*

Gregorius Gnan Argentinensis Alsatus-7-+

Heinricus a Fleckenstein-7-+

Georgius Gallet Barroducæus-7-*

Carolus Perrinus Lyneiacus Barreducis-7-*

Ofrycus de Hangenot Lotaringus Viziliiensis in comitatu Vademontanensi-7-*

Joannes a Longavilla (*lecture incertaine*) Barraducæus-7-*

Christophorus Preudhomme Samiellanus Lotharingus-7-*

Henricus Henezon Samiellanus Lotharingus-7-*

Joannes Mauljeay Lotharingus Sammiellanus-7-*

Claudius Franciscus Lullier, Bisuntinae dioecesis-7-=

Nicolaus Derand Lotharingus ex civitate de Rambevilla, dioecesis Tullensis-7-*

Samsonus Hugon, Bisuntinae diocesis, Burgundus-7-=

Hieronymus Terrel Nanceianus-7-*

Franciscus Philibertus de Montey, Bisuntinae dioecesis-7-=

Franciscus [S]alomom (*lecture incertaine*) Barrensis, dioecesis Tullensis-7-*

Hugo Cabet Vesuntinus-7-=

Franciscus Monnier Bisuntinus-7-=

Joannes Humbertus nobilis Lotharingus-7-*

Joannes Schnetzerus Alsatus Ensishemianus-7-+

Ludovicus Michelot Bisuntinus-7-=

Nicolaus Verion Lotharingus ex dioecesi Tullensi-7-*

Philibertus Pourtier Burgundio-Salineus-7-=

Philebertus Philbertus Nanceianus Lotharingus-7-*

Reginaldus Helloz Vicensis Lotaringus-7-*

Matheus Couthenetius Burgundus Pontissaluensis-7-=

Petrus Collignon Nanccianus-7-*

Balthazar Renner Nanccianus-7-*

Johannes Conradus Vischerus Argentinensis-7-+

Carolus Oryot Barrensis-7-*

Franciscus Mourot Barrensis-7-*

Balthazarus de Neyon Barrensis-7-*

Matthæus Berner Argentoratensis Alsaticus-7-+

Jacobus Falck Argentoratensis Alsaticus-7-+

Claudius Rhoder de Jubainville nobilis Lotharingus ex civitate Tullensi-7-*

Antonius Borrey Bisuntinus-7-=

Franciscus d’Orival Bisuntinus-7-=

Joannes Migetius Pontissaliensis-7-=

Antonius Borrey Bisuntinus-7-=

Franciscus d’Orival Bisuntinus-7-=

Joannes Migetius Pontissaliensis-7-=

Joannes de Laronzide [?]-7-*

Raphael Menginus Lotharingus Commeciensis-7-*

Joannes Vannesson Lotharingus Commeciensis-7-*

Raphael Menginus Lotharingus Commeciensis-7-*

Joannes Vannesson Lotharingus Commeciensis-7-*

Guido Materot Dolanus Burgundus-7-=

Joannes Gaudinot (Baudinot) Charrolotensis (Charolles) [?]-7-=

Paulus Dietreman de Baudonviller Lorrain-7-*

Gerardus Escarnol, Bisuntinae dioecesis-7-=

Julianus Bunodus, Bisontinae diocoesis-7-=

Simon Dard Vesulanus ex comitatu Burgundiae-7-=

Philippus Jacobus a Fleckenstein liber baro in Dagstuhl-7-+

Maximilianus Zwanger Tabernensis Alsata-7-+

Henricus Jantolus Dolanus-7-=

Stephanus de La Chez ex comitatu Burgundiae-7-=

Henricus Labret Burgundus-7-=

Anthonius Le Marischalle Lotaringus-7-*

Joannes a Deschart Lotharingus-7-*

Joannes de Mussey Lotharingus-7-*

Claudius Belot dictus De Villette Burgundus-7-=

Claudius Petit Benoit Burgundus Pontarliensis-7-=

Johannes Goubarts A……. [?]-7-+

Joannes Gachault Dolanus comitatus Burgundiae, dioecesis Bisuntinae-7-=

Guido Nacleus Dolanus comitatus Burgundiae, dioecesis Bisuntinae-7-=

Erricus Hieronymus Lotsizamus Mussipontanus, dioecesis Tullensis-7-*

Joannes Anthonius Decoinva Calmelesus comitatus Burgundiae, dioecesis Bisuntinae-7-=

Antonius Valle Bisuntinus-7-=

Daniel Chassignel Bisontinus-7-=

Daniel Prinæus Bisuntinus-7-=

Perrinus Sanche Pæsmensus, Bisuntinensis dioecesis-7-=

Claudius Guillegard Grajacensis-7-=

Franciscus du Puys Barrensis ex Lotharingia-7-*

Carolus Asselin Sammielanus/ Pomiellanus ex Lotharingia-7-*

Antonius Barberos Grayanus Burgundus-7-=

Nicolaus Millon Lonjuleanus Lotharingus-7-*

Johannes Philippus Kesselring Colmariensis-7-*

Franciscus Petit Burgundus Grajanus, Bisuntinae dioecesis-7-=

Paulus Flach Argentinensis-7-+

Carolus Barrois Sammiellanus nobilis Lotharingus-7-*

Anthonius de La Roches Lotharingus, Methensis [dioecesis]-7-*

Joannes Bretonius Janinsiensis Lotharingus, dioecesis Metensis-7-*

Carolus de Begue Nanceianus Lotharingus-7-*

Jacobus Le Moleur Lotharingus-7-*

Joannes de Montoiche Bisontinus-7-=

Georgius Evvrardus Mombelgardensis-7-=

Nicolaus Menginus Nanceianus-7-*

-7-France : Alsace, Lorraine, Franche-Comté

Lorraine-7-*

Alsace-7-+

Franche-Comté-7-=

1621-1630

Ludovicus de Ramberviller Lotharingo-Vicensis, dioecesis Metensis-7-*

Joannes Pacotius Luciensis comitatus Burgundiae-7-=

Desiderius Hanel Lineensis apud Barrum in Lotharingia-7-*

Guillelelmus Crophal Lotharingus-7-*

Franciscus de Larche Virdunensis-7-*

Gaspardus Pançon Lotharingus Tu[l]ensis-7-*

Hieronymus de Lisola Bisuntinus-7-=

Anthonius de Mussey Barroducensis-7-*

Nicolaus Barbillat Barroducensis-7-*

Johannes Abrahamus de Boulard Barroducensis-7-*

Nicolaus de Sain…. (*lecture incertaine*) [?]-7-*

Nicolaus des Ancherius de Sainct-Maurice Virdunensis-7-*

Joannes Claudius Lanssard Bisuntinus in comitatu Burgundiae-7-=

Leonardus Binningerus Blamontano-Mombelgardicus-7-=

Petrus Jacquinet Marchiensis Lotharingus-7-*

Andreas Moytellier Dainbillanus Lotharingus-7-*

Claudius Martinus Marchiensis Lotharingus-7-*

Carolus d’Alençon Barrensis-7-*

Adriannus de Cunchy Peulensis [?]-7-*

Edvardus des Hazards Tullensis-7-*

Claudius Otheninus Bailly Sequanus Ornacensis-7-=

Joannes Baptista Tranchant Sequanus Vesuliensis-7-=

Petrus Franciscus Deparres Sequanus Auricampensis-7-=

Nicolauss Vaillot Nauncy-7-*

Joannes Poinsot Metensis-7-*

Claudius Courlest Burgundus Pontissaliensis-7-=

Nicolaus Chaumont de Dole Bourguignon-7-=

Philippus Reginaldus Lotharingus (*nom biffé*) (hic infamia a natione notatus est)-7-*

Joannes Legier Dolanus-7-=

Marcus Clerc Sequanus Vesulanus-7-=

Matthæus Parreau Sequanus Pontarliensis-7-=

Franciscus Cadot Grayacensis Sequanus, Bisuntinae dioecesis-7-=

Petrus Noirot Grajacensis Burgundus, Bisuntinae dioecesis-7-=

Petrus de Diocourt Gondrecuriensis-7-*

Joannes Bardin Lotharingus Nanceianus-7-*

Quirinus de Jubainville Lotharingus Tullensis-7-*

Joannes Bailluvus Lotharingus Tullensis-7-*

Leonellus Fauche de Bournay Dolanus, Bisuntinae dioecesis-7-=

Claudius de Lisola Bisuntinus-7-=

Joannes Jacobus Bournoy Lotharingus Sammiellanus-7-*

Gerardus Wilnesson dictus Bya, dioecesis Metensis-7-*

Johannes Jalon Metensis-7-*

Nicolaus Didelot Lotharingus Barrensis-7-*

Christophorus Cuny Barrensis-7-*

Franciscus Lusson (Husson) Ligneiensis-7-*

Josephus du Parge Valliscolovensis (Vaucouleurs ?)-7-*

Antonius Perrin Barrensis, dioecesis Tullensis-7-*

Podericus Maclot Stenacensis Lotharingus-7-*

Everardus du Parge Valliscolovensis-7-*

Daniel Heinrici Argentinensis-7-+

Joannes des Androuins Virdunensis-7-*

Nicolaus Laurentius Virdunensis-7-*

Nicolaus Jallot Mannayriensis Lotharingus, Tullensis dioecesis-7-*

Magister Johannes Petrus Thomas Walliferus Argentoratensis-7-+

Joannes Jacobus Barotius e Waltighoff Suntgoius-7-+

Philip Boctomset Burgundus Bisuntinus-7-=

Joannes Franciscus Colin dominus de Doreon Burgundus Pontissaliensis-7-=

Clemens Ballay Lotharingus Relangensis-7-*

Ambrosius Dieffenbach Richovilla-Alsatus-7-+

Matthæus Wetzell Colmariensis-7-+

Johannes Philippus Böckle Argentinensis-7-+

Johannes Casparus Heppius Argentinensis-7-+

Matthæus Franchel Burgundus Pontissaliensis-7-=

Joannes Petite Burgundus Pontarliensis-7-=

Joannes Pourtier Salinatus [?]-7-*

Claudius Sinet Nanceianus Lotharingus-7-*

Theodoricus Sinet Nanceianus Lotharingus-7-*

Joannes Christophorus Reichenberg Haganoensis Alsata-7-+

Caspar Ramasson ex comitatu Burgundiae Palmensis-7-=

Gilmanus Gilbert Palmensis ex comitatu Burgundiae-7-=

Nicolaus Nazey (Nagey) Bisuntinus-7-=

Joannes Baptista Boitouset Bisuntinus-7-=

Anthonius de Rosieres de Vaux-7-=

Petrus Franciscus Despoutot Burgundus Bisuntinus-7-=

Petrus Franchis Burgundus Bisuntinus-7-=

Petrus Franciscus Leschelle Bisuntinus-7-=

Petrus Franciscus Hugon Grayacensis Burgundus-7-=

Julius Fridericus Perrenon Montisbelgardensis-7-=

Franciscus Nazey Bisuntinus-7-=

Thomas Varin Bisuntinus-7-=

Franciscus Noirot Manouuciensis Lotaringus-7-*

Antonius Morison Barroducæus Lhotaringus-7-*

-7-France : Alsace, Lorraine, Franche-Comté

Lorraine-7-*

Alsace-7-+

Franche-Comté-7-=

1631-1640

Stephanus Ponnier Montbelgardensis-7-=

Claudius Bergeret Arbosianus Comitanus-7-=

Carolus Wilhelmus Streitt ab Immendingen Alsata-7-+

Philippus Jacobus Waldner de Freindstein dominus in Wenckenthall-7-+

Joan-Paul-Meyger Argentinae Alsatus-7-+

Georgius du Vernoy Montbelgardensis-7-=

Henricus Leurechon Barroducensis-7-*

Daniel Rixingen Argentina-Alsatus-7-+

Claudius Petremond Bisuntinus Burgundus-7-=

Joannes Georgius Jaquinot Vesulanus Burgundus-7-=

David Heusch Pfaltzburgensis-7-*

Jean Melchior Eichhern de Baumboldre Bipontinus-7-=

Gaspar Girarda Burgundus Mortuaguensis, dioecesis Bisuntinae-7-=

Prudentius Chalon Vesulanus Burgundus-7-=

Joannes Reinboldus Diterich Argentina-Alsatus-7-+

Joannes Baptista Maillot Lutrencis Bourgondus-7-=

Claudius Franciscus Terrier Telutanus Burgundus-7-=

Ludovicus Fleutot Metensis-7-*

Paulus Friderici Argentoratensis-7-+

Johannes Carolus Mueg Argentoratensis-7-+

Claudius Stephanus Bigeot Dolanus comitatus Burgundiae-7-=

Johannes Philippus Friderici Argentinensis-7-+

Joannes Jacobus Bartt Selestadianus Alsata-7-+

Joannes Petrus Collonel Borrensis Alsata-7-+

Bartholomæus Will Molshemensis Alsata-7-+

Jacobus Buobius Colmaria-Alsatus, l[egum] stud.-7-+

Ernestus Heus Argentoratensis-7-+

Hilarius Meyger Argentoratensis-7-+

Johan Philipp Reichardt von Strassburg-7-+

Johannes Georgius Brimmer Argentinensis-7-+

Hartmannus Fridericus a Breiten-Landenberg-7-+

Joannes Philippus Orth Brocomaco-Trebocus-7-+

Franciscus Andreas Virdunensis dioecesis-7-*

-7-France : Alsace, Lorraine, Franche-Comté

Lorraine-7-*

Alsace-7-+

Franche-Comté-7-=

1641-1650

Samuel Brisechous Mombelgardensis-7-=

Carolus Thiery Lotharus urbe Samiellana oriundus-7-*

Nicolaus Masson Lotharus urbe Samiellana oriundus-7-*

Pierre Philippe de Colmar-7-+

Josephus Ancillon Mediomatrix hodie Metensis-7-*

Johannes Sebastianus Gambs Argentoratensis-7-+

Sebastianus Negelin Argentinensis-7-+

Jacobus du Laurent Verdunensis-7-*

Franciscus de Bloise Demblemont Lotharingus Samiellanus-7-*

[Joannes] Emanuel Reich, phil. M, Tabernensis Alsata-7-+

Joannes Michael Sonner Elzachensis Brisgoius-7-+

Jacobus Becker Argentinensis-7-+

Carolus Bouvot Bisuntinus Burgundus-7-=

Johannes Sebastianus Gambs Argentoratensis-7-+

Claudius Ludovicus Chassigni Bisuntinus-7-=

Joannes Le Fournier Virdunensis-7-*

Antonius Franciscus Bouvot Bisuntinus-7-=

Ludovicus Bayard Mercuriensis in Lotharingia-7-*

Joannes Franciscus Pouter de Vitrange, dioecesis Metensis-7-*

[B.J.] Preudhomme de Vitrimont Lotharingus urbis Nanceianæ-7-*

Franciscus Reud Bisuntinus Imperialis-7-=

-7-France : Alsace, Lorraine, Franche-Comté

Lorraine-7-*

Alsace-7-+

Franche-Comté-7-=

1651-1660

Isaacus Dutiltre Sedanensis-7-+

Nicolaus du Hautoy Virdunensis-7-*

Joannes Bap Boudret Bisuntinus-7-=

Claudius de Mazerville Lotharingus-7-*

Augustus Fridericus Mockelius Hallensis-7-+

Christophorus Jacobus Mockhelius Hallensis-7-+

Johannes Fridericus Crauth Argentinensis-7-+

Johann Leonhard Fröreisenius Argentoratensis-7-+

Joannes Baptista Boudret Bisuntinus-7-=

Carolus Alexander Metensis-7-*

Carolus de Montigny Metensis-7-*

Gabriel Joseph Preiss Colmariensis Alsatus-7-+

Franciscus dux Lotharingiae, 1656-7-*

Ferdinandus dux Lotharingiae-7-*

Claudius Ambrosius Bourgon Bisuntinus-7-=

Franciscus Christophorus de Rosenbach Alsata-7-+

David Ferry Metensis-7-*

Nicolaus Arnoult Tullensis dioecesis-7-*

Valentinus Barthius Colmariensis Alsatus-7-+

-7-France : Alsace, Lorraine, Franche-Comté

Lorraine-7-*

Alsace-7-+

Franche-Comté-7-=

1661-1670

Johannes de Bachellé Metensis-7-*

Claudius Ambrosius Reud Bisuntinus-7-=

Johann Philipp Joham von Mundelsheim-7-+

Thomas Guilloz Visuntinus-7-=

Jacobus Laurentii Verdunensis-7-*

Johannes Camel Argentoratensis-7-+

Fridericus Louys Waldner de Freundstein d’Alsace-7-+

Joannes Jacobus de Turnhoven Turkheimensis-7-+

Petrus Thomas Epurard Nanceianus. Januario-1670, lethaliter vulneratus fuit-7-*

Ernestus Fridericus Mollinger Argentinensis-7-+

Wolff Dieterich de Landsperg Alsatus eques-7-+

-7-France : Alsace, Lorraine, Franche-Comté

Lorraine-7-*

Alsace-7-+

Franche-Comté-7-=

1671-1680

Franciscus Christophorus a Schellenberg Alsata-7-+

Petrus Jobart Barrensis-7-*

Johannes Philippus Cast Argentinensis-7-+

Johannes Melchior Mollinger Argentinensis-7-+

Ludovicus de Garantreuille Senonensis-7-*

-7-France : Alsace, Lorraine, Franche-Comté

Lorraine-7-*

Alsace-7-+

Franche-Comté-7-=

1681-1689

Ignatius Theobaldus Hartmannus de Reynach Dannensis-7-+

Florentius Bouiste Alsata-Selestadiensis-7-+

Alexander dei Monson eques dominus de Rommecourt Lotaringius-7-*

Franciscus Rose ex le Tailly-7-=

Petrus Rose ex le Tailly-7-=

-7-France : Alsace, Lorraine, Franche-Comté

Lorraine-7-*

Alsace-7-+

Franche-Comté-7-=

1721-1781

……………………………………….

-8-Grande-Bretagne, Irlande

Ecosse-8-*

Angleterre-8-+

Irlande-8-=

1661-1670

Jacobus Douglasius marchio de Dougale Scotus, 20 octobris 1664-8-*

Joannes Croichtonius natione Scotus, 20 octobris 1664-8-*

David de Ogilvy Scotus, 5 junii 1665-8-*

Francis Giilb [baro] Scotus, 9 junii 1665-8-*

Adam Loftus [baro Hibernus],1665-8-=

Joannes Ogilvy Scoto-Britanus (ejusdem domini marchionis gubernator), 5 junii 1665-8-*

Patricius Cortæus Scotus (ejusdem domini baronis gubernator), 9 junii 1665-8-*

Gulielmus Stewart Britanus, die nono novembris 1665-8-*

Grevilius Verney eques …., die nono novembris 1665-8-+

Guilielmus Soame, 1665-8-+

Thomas Dobie Scotus, 9 novembris 1665-8-*

Archibaldus Areskinus Scotus, 9 novembris 1665-8-*

Henricus Paman Anglus, 9 novembris 1665-8-+

Johan Vingers (*ou* Ringers) Camp-Vera-Zelandus (*nation d’Écosse à Veere*), 22 octobris 1666-8-*

Thomas Weir Zeelandia Campveer (*nation d’Écosse à Veere*), 15 decembris 1666-8-*

Jacobus Drummond Anglus, [januarii] 1668-8-+

Johannes Drummond Anglus, [januarii] 1668-8-+

Patrik Murray de Elibank, 10 septembris 1669-8-*

Johannes Stevartt, 10 septembris 1669-8-*

William Hay Scoto-Britannus, 10 septembris 1669-8-*

-8-Grande-Bretagne, Irlande

Ecosse-8-*

Angleterre-8-+

Irlande-8-=

1671-1680

Guilielmus Prol Scotus, 24 augusti 1671-8-*

Alexander Murray Scotus, 2 septembris 1673-8-*

Joannes Preston Scotus, 30 aprilis 1674-8-*

Lennardus Higgesius de Edenburg, 24 maji 1675-8-*

Philippus Standsfeild Scotus, 21 aprilis 1676-8-*

Henricus Fletcherus Scotus, 1 junii 1676-8-*

Gilbertus Atkinson Anglus, artium magister in academia Cantabrigiensi, 29 septembris 1679-8-+

Archibaldus Cockburnus Scotus, 6 octobris 1679-8-*

Gulielmus Cockburnus, 6 octobris 1679-8-*

Georgius Brunus Scotus, 6 octobris 1679-8-*

Johannes Reid Londino-Anglus, [augusti] 1680-8-+

Henricus Robertson …. [?], 3 octobris 1680-8-+

-8-Grande-Bretagne, Irlande

Ecosse-8-*

Angleterre-8-+

Irlande-8-=

1681-1689

Henricus Barker Trinovantus et armiger Anglus, 18 februarii 1684-8-*

Thomas Fotherby Anglus, 22 martii 1684-8-*

Robertus Bernard Baronettus Anglus, 22 martii 1684-8-*

Thomas Nicolson Scotus, 25 septembris 1686-8-*

Jacobus Olyphant Scoto-Britannus, 25 septembris 1686-8-*

Alexander Ross Scotus, 5 junii 1687-8-*

Carolus Mac-Carthy Hibernus, 1 aprilis 1688-8-=

Joannes Hannen Londinensis, 10 julii 1688-8-+

Guilielmus Regan Hybernus, 15 septembris 1688-8-=

Edmundus Curten Hybernus, 18 martii 1689-8-=

-8-Grande-Bretagne, Irlande

Ecosse-8-*

Angleterre-8-+

Irlande-8-=

1721-1781

Ricardus Croswell de Bridgnoille armiger, 30 maji 1729/1730-8-+

Robertus More Salopiensis armiger, 30 augusti 1729/1730-8-+

….. Beale Salopiensis armiger, 30 augusti1729/1730-8-+

Joannes Forbes armiger serenissimi Britaniarum regis advocati filius, 17 julii 1730-8-+

Pat Murdoch Scotus A.M., 1730-8-*

-9-Pays-Bas : Frise, Groningue

Frise occidentale, Leeuwarden-9-*

Groningue-Ommelanden-9-=

1602-1610

Tacitus a Burmania Frisius occidentalis-9-*

Martinus Martinides Frisius-9-*

Elco Heymans Frisius occidentalis-9-*

Edzerdus Rengers in Post Omlandus Frisius-9-=

Henricus Robers (Frisius ?)-9-*

Gerardus Loo Leowardiensis Frisius-9-*

Fredericus Gockinga Frisius Groningensis-9-=

Bernardus van Heringha Frisius occidentalis-9-*

Rembertus Agricola alias Husman Frisius occidentalis-9-*

Goffo a Zyaerda Frisius occidentalis-9-*

Tethardus a Walta Frisius occidentalis-9-*

Fredericus a Regnaerda Frisius occiduus-9-*

Focco a Rhaarda Doccumensis Frisius-9-*

Hajo Elcama Frisius occidentalis-9-*

Dominicus ab Hottingha Frisius occidentalis-9-*

Viglius Wiarda Frisius-9-*

Joannes Adriani Ossaneus Frisius-9-*

Theodorus Govvers Harlingensis Frisius-9-*

Cyprianus Vomelius genandt Staper-9-*

Jelbinus Lenzius Leoverdianus Friso-9-*

Foppius Scheltonius Aezema Frisius occidentalis-9-*

Coppinus dictus Albertus Jarghes Groningensis-9-=

Theodorus Marssum Leovardiensis Frisius-9-*

Guilhelmus Balthazarus baro tzu Schwartzebergh-9-*

Elco Edonis Dronrypeus Frisius-9-*

Gellius Heidoma Leovardiensis Frisius-9-*

Mauritius Phoca Minnema Frisius-9-*

Franciscus a Jongema Frisius Wommeliensis-9-*

Hesselus a Meckma Frisius occidentalis-9-*

Boetius Grovestins Frysius-9-*

Georgius Piphren Harlingus Friso-9-*

Edzerdus Jacobus Clant a Stedum Omlandus Frisius-9-=

Rembertus Rengers in Tuinga Omlandus Frisius-9-=

Hildebrandus Gruysz Groninga-Frisius-9-=

Jacobus Juckema F[risius] Pr RA.-9-*

Andreas Jacobus Winshemius Omlandius Frisius-9-=

Gerhardus Sigers Groninganus Frisius-9-=

Sebastianus Broeils Groninganus Frisius-9-=

Regnerus Eisinga Groninganus Frisius-9-=

Petrus a Loo Leovardiensis Phrysius-9-*

Focco Georgii Frisius-9-*

Arnoldus Haarsma Leovardiensis Frisius-9-*

Aulus Heynama Frisius-9-*

Hector Meinsma Leovardiensis Frisius-9-*

Cyprianus Peter Meiers Dochemensis Frisius-9-*

Henricus Dionysius Doccumensis Frisius-9-*

Vibius Jeltingha Frisius Doccumanus-9-*

Andreas a Sytzama Leovardiensis Frisius-9-*

Lollius Dominici Billanus Frisius-9-*

Hesselus Sminia Leovardiensis Frisius-9-*

Gosuinus Schaffer Frisius Gronningensis-9-=

Johannes Ginbergius Frysius-9-*

Pompeius Gruyss Frisius Groningensis-9-=

Everardus Lewe Frisius Gronninganus-9-=

Ludolphus Henrici Frisius Groninganus-9-=

Focco Francesci Unia Stenano-Frisius-9-*

Joannes Hoptilla Leovardiensis Friso-9-*

Mathias Franckena Stellingwarfius Frisius occidentalis-9-*

Franciscus a Scheltema Frisius-9-*

Stephanus Abbema Frisius-9-*

Andreas Epæus Frisius-9-*

Bocatius Hopperus Frisius occidentalis-9-*

Matthias Viersenius Leowerdiensis Frisius-9-*

Everdus Boner ex Leowardia Frisius-9-*

Joannes Reneman Leowardiensis Frisius-9-*

Bernhardus Julsingh Groningensis Frisius-9-=

Joannes a Tyara Leovardiensis Frisius-9-*

Tzalinus Riemersma Leovardiensis Frisius-9-*

Ernestus H a Donia Frisius occiduus-9-*

Tiberius a Oennama Frisius occiduus-9-*

-9-Pays-Bas : Frise, Groningue

Frise occidentale, Leeuwarden-9-*

Groningue-Ommelanden-9-=

1611-1620

Schelto ab Ebbinga Frisius occidentalis-9-*

Nicolaus Wychmaal Leowardiensis Frisius-9-*

Otho Wygara Frisius occidentalis-9-*

Gerardus Quirini de Blauw Lemmius Phryso-9-*

Reinoldus Alberda junior Groninganus-9-=

Sibrandus a Burmania Frisius occidentalis-9-*

Hector Bouricius Leoverdiensis Frisius-9-*

Joannes Petri Veltdriel Frisius Doccumanus-9-*

Ferdinandus comes in Schwarzenbergn, dominus in Hohenlandtsperg-9-*

Carolus comes in Schwarzenbergn, dominus in Hohenlandtsperg-9-*

Livius Scheltinga Leowerdiensis Friso-9-*

Lubbertus Julsing Groninganus-9-=

Theodorus Upkena Groninganus-9-=

Gossuinus ab Ornia Doccumanus Frisius-9-*

Dominicus ab Ornia Frisius Doccumensis Frisius-9-*

Wibrandus Bras Leowardiensis Frisius-9-*

Dominicus a Syxma Frisius-9-*

Horatius Meinsma Frisius-9-*

Cornelius Leonhardi Vermees occiduus Frisius Doccumanus-9-*

Joannes Jubema Stenvico-Frisius-9-*

Leonardus Adriany Cronenborch Leovardiensis-9-*

Matthias a Vierssen junior Frisius Leovardiensis-9-*

Otto Hobbema Frisius Dockumanus-9-*

Christophorus ab Ewsum Groningensis-9-=

Petrus Hillebrandes ab Harsens Gronningensis-9-=

Foppo Hillebrandes ab Harsens Gronningensis-9-=

Cornelius Gothofredus Leowardiensis Frisius-9-*

Joannes Duringh Leovardiensis Frisius-9-*

Johan van Beyma Frisius-9-*

Lambertus van Beyma Frisius-9-*

Jacobus Fabritius Leovardiensis Frisius-9-*

Johannes Dominicus Valrichemius Frisius-9-*

Osebrandus Rengers Frisius-9-*

Symon Sicher van Lieverden in Fryslant-9-*

Henricus Geldorpius Harlingensis Frisius-9-*

Regnerus a Sytzama Leoverdiensis Frisius occidentalis-9-*

Joannes Horenken Gronninganus-9-=

Taco Entens van Groningen-9-=

Menno Broersema van Groningen-9-=

Martinus Gravius [Snecanus] Frisius-9-*

Georgius a Vierssen Frisius-9-*

Otto Swalve Frisius Leowardiensis-9-*

Adigerius Adius Frison-9-*

Gisbertus ab Aernsma Leovardiensis Frisius-9-*

Hadrianus a Velsen Leoverdiensis Friso-9-*

Jacobus Jellerdi [Rosema] Leoverdiensis Frisius-9-*

Georgius a Goer Gronningensis Frisius-9-=

Snelgerus van Meckhama van Gronningen-9-=

Simon Fetzonis Leowerdiensis Frisius-9-*

Joannes Renici Frisius Snecanus-9-*

Jodocus a Scheltingha Leoverdiensis Frisius-9-*

Albertus Christophorus ab Aernsma Leoverdiensis Frisius-9-*

Homerus Camstra nobilis Frisius Leovardiensis-9-*

Epeus a Douma nobilis Frisius Leoverdiensis-9-*

Pet[rus] Gabinius Eminga occidentalis Frisius-9-*

Petrus Eisinge Groninga-Frisius-9-=

Albertus Loo Leowardiensis Frisius-9-*

Nicolaus Bus Groninga-Frisius-9-=

Johannes a Velsen Leowardia-Frisius-9-*

Johannes Henrici Gualtherus Leoverdiensis Frysius-9-*

Coppinus Albartus Jarghes Gronninganus Frisius-9-=

Albert van Loo Frisius-9-*

Suffridus Rispens Frisius Leowardiensis-9-*

Schelto Jeltinga Frisius Leowardiensis-9-*

Hesselus a Gerritzma Frisius-9-*

Gualterus Schonenberch Groninga-Frisius-9-=

Petrus ab Heerma Bolswardiensis Frisius-9-*

Joannes a Camminga Frisius-9-*

Petrus Albarda Groninganus Frisius-9-=

Gerhardus Buning Frisius Groninganus-9-=

Albertus Hooftman Groninganus Frisius-9-=

Egbertus Schatter Groninganus Frisius-9-=

Jacobus Buttinga Leovardiensis Phrysius-9-*

Sabinus Fockens Leovardiensis Frisius-9-*

Tzallingus ab Epema Mhunsnoldum-9-*

Andreas Pierii ab Hooch-Hymstra Harlingensis Frisius-9-*

-9-Pays-Bas : Frise, Groningue

Frise occidentale, Leeuwarden-9-*

Groningue-Ommelanden-9-=

1621-1630

Allardus Burum Leowardia-Frisius-9-*

Theodoricus Albarda Gronninganus Frisius-9-=

Leo ab Aitsema Doccomio-Frisius-9-*

Joannes Dronryp Groningano-Phrisius-9-=

Otto Valcke Groninganus-9-=

Udalricus ab Ulenburg Leovardiensis Friso-9-*

Johannes Klinge Groningano-Frisius-9-=

Johannes Grawers Groningano-Frisius-9-=

Regnerus Albarda Groningano-Frisius-9-=

Vibrandus Geldorpius Harlinga-Frisius-9-*

Adrianus Simonides Groninganus-9-=

Johannes Drews Groninga-Frisius-9-=

Albertus Leo Gronninga-Frisius-9-=

Johannes Tiassens Groninganus-Frisius-9-=

Jebbo Aldringha Groninganus-Frisius-9-=

Hilbrandus Gruis van Wirdum Frisius Translavicanus-9-*

Hilbrandus Gruys junior Groeningensis-9-=

Adolphus Louwens Gronninganus-9-=

Bernardus Harmanni Soennen-stern Groeningensis-9-=

Wigboldus Andringa Groninganus-9-=

Otto Fermpsum Groninganus-9-=

Joannes Ferdinandus comes a Schwarzenberg, dominus in Hohenlandsperg-9-*

Jodocus a Cleve Groninganus-9-=

Rudolphus a Cleve Groninganus-9-=

Tarquinus a Solcama Frisius-9-*

Egbertus Wilcken Friese Groninganus-9-=

Wilhelmus a Berum Frisio-Gronninganus-9-=

Egbertus Buchorst Gronninga-Frisius-9-=

Amelius ab Oenema Frisius-9-*

Paulus Stalpart van der Wiellen Groninganus-9-=

Albertus Borchuis Groninganus Frisius-9-=

Nicolaus Frix Gronninganus-9-=

Meinardt Renckem Frisius-9-*

Fecco a Jeltinga Frisius-9-*

Jacobus Hartius Leovardiensis Frisius-9-*

Homerus Wigboldi Groninganus-9-=

Sigerus Sighers Groninganus-9-=

Ivo Hillebrandes ab Harsens Groninganus-9-=

Antonius Gerlacius Groninganus-9-=

Lucas van Hulten Groninganus-9-=

Valerius Godschalcus ab Heerma Bolsverdiensis Frisius-9-*

Ebertus Emius Groningensis. *Décédé à Orléans le 4 août 1625*-9-=

Wilhelmus a Berum Gronninganus-9-=

Caspar de Mepsche Gronninganus-9-=

Haringus ab Harinxma Hagæus Frisius-9-*

Richardus ab Eysingha Frisius-9-*

Marcus Aetsma Frisius-9-*

Carolus Mulerius Harlinga-Frisius-9-*

Gualterus Castrichom Groningensis-9-=

Sixtus ab Emingha Frisius-9-*

Meinardus Nyenhuis Frisius-9-*

Assuerus a Viersen Frisius-9-*

Onno Olau Berum Gronninganus-9-=

Wigbolt Ripperda Gronnigensis-9-=

Johannes Rüfelaertz Groninganus-9-=

Albertus Sighers Groninganus-9-=

Theodorus Eyssonius Groninga-Frisius-9-=

Johannes Redeker Groninganus Frisius-9-=

Rudolphus Schüring Groninganus-9-=

Hieronimus Eyben Groninga-Frisius-9-=

Folkardus Folkers Groninga-Frisius-9-=

Petrus Folckers Groninga-Frisius-9-=

Joannes Westerwolt Groninga-Frisius-9-=

Sibrandus Gockinga Omblandus-9-=

Heinsius van Coeverden Groningensis Frisius-9-=

Gvalterus Bernhardi Warfhemius Groningensis Frisius-9-=

Hero tho Nansum Groningensis Frisius-9-=

Nicolaus Frix Groningensis Fris[i]us-9-=

Siverdus Saeckma Leoverdiensis Frisius-9-*

Homerus ab Harinxma Frisius occidentalis-9-*

Schelto Aitsema Doccumo-Frisius-9-*

Georgius van der Ley Frisius-9-*

Fredericus Hillama Leoverdiensis Frisius-9-*

Arnoldus Hillama Leoverdiensis Frisius-9-*

Godefridus Camstra Frisius nobilis-9-*

Jacobus a Stellingwerff Moscovita-9-*

Petrus Huingha Groninga-Frisius-9-=

Edsardus a Wyckel Frisius-9-*

Hans van Lycklama Frisius-9-*

Epeus van Wyckel Frisius-9-*

Franciscus Muceri Groningensis-9-=

Arnoldus ab Heymans Frisius Leovardiensis-9-*

Petrus ab Harinxma toe Sloten Frisius-9-*

Hesselus Mockema van Aylva a Frisia-9-*

Dominicus ab Aylva a Frisia-9-*

Carolus a Roorda Gravio-Frisius-9-*

Ruardus a Roorda Franequerensis Frisius-9-*

-9-Pays-Bas : Frise, Groningue

Frise occidentale, Leeuwarden-9-*

Groningue-Ommelanden-9-=

1631-1640

Adrianus Hagius Leoverdiensis Frisius-9-*

Regnerus Ravens Leowardiensis Frisius-9-*

Johannes Aysma Frislant uit Leuwarden-9-*

Jacobus a Wieringa Groninganus-9-=

Andreas Galichius Frisius-9-*

Jarichus ab Hottinga Frisius-9-*

Joannes Lentemans Frisius Doccumanus-9-*

Pompeius Tammes Groninga-Omlandus-9-=

Epeus Glinstra Leovardiensis Frisius-9-*

Theodorus Saeckma Leovardia-Frisius-9-*

Jacobus Jeltema Leovardiensis Frisius-9-*

Tiberius Thomæ f[ilius] Frisius-9-*

Lotichius Johannis Groninganus-9-=

Tiberius Popta Friso Harlingensis-9-*

Hector ab Epema Frisius-9-*

Gasparus a Campen Leovardiensis Frisius-9-*

Abrahamus Hillama Leoverdiensis Frisius-9-*

Hartesius Iepema Frisius-9-*

Melchior Melchers Groninganus-9-=

Albert van der Merwen Groninganus-9-=

Daniel Alberti Groninganus-9-=

Andolphus Clant Groningæ-Omblandus-9-=

Egerus Tamminga Groninga-Omblandus-9-=

Theotardus Boelema Leoverdiensis Frisius-9-*

Gothofredus Sibrandi Jorritsma Leoverdiensis Frisius-9-*

Fr. Mathias Allardi Groninganus (hic gratis immatriculatus)-9-=

Johannes Wringer Franequerensis Frisius-9-*

Atho Rhiemers Groninga-Omlandus-9-=

Duco van Jeltinga Frisius-9-*

Philippus ab Iepema Frisius-9-*

Allardus Petrus Jongestall Stavriensis Frisius-9-*

Henricus Neuhusius Leowardiensis Frisius-9-*

Menso van Gabbema Leoverdiensis Frisius-9-*

Wilhelmus ab Ewsum Groninganus-9-=

Ulpianus ab Aylva Frisius-9-*

Johannes Schulenborch Groninganus-9-=

Albertus Barels Frisius occidentalis-9-*

Schotto Tamminga Omblandus-9-=

Nicolaus Nicolai Frisius Leovardiensis-9-*

Johannes de Glinstra Leovardiensis Frisius-9-*

Joachimus Canter Groninganus-9-=

Michael Mentinc Groninganus-9-=

Johannes Ovinck Groninganus-9-=

Petrus Winshemius Groninganus-9-=

Gerhardus ten Berge Groninganus-9-=

Joannes Pluymioen Sneca-Frisius-9-*

Dirk Sissinck van Groningen-9-=

Gerardus Gruys Groninganus-9-=

Rodolphus tho Nanzum Groninganus-9-=

Bartholdus Jacobus Wicheringe Groninganus-9-=

Henning Georg van Andree Franequera-Frisius-9-*

Jacobus a Marsum Leovardiensis Frisius-9-*

Abrahamus Mellinga Leovardiensis Frisius-9-*

S[ixtus] Abinga van Humalda Doccumanus Frisius-9-*

Petrus Nys Leovardo-Frisius-9-*

Philippus a Meckhama Frisius-9-*

Feyo a Scheltema Frisius-9-*

Osebrand Johan van Renghers Frisius, nobilis dominus Slochteren-9-*

-9-Pays-Bas : Frise, Groningue

Frise occidentale, Leeuwarden-9-*

Groningue-Ommelanden-9-=

1641-1650

Adigerus Lambartus Adius Leovardia-Frisius-9-*

Homerus Haikens Gronninga-Omlandus-9-=

Fridericus Reinalda Sneca-Frisius-9-*

Lambertus Adius Leovardia-Frisius-9-*

Dodonæus Kolde Leowardia-Friso-9-*

Philippus Æbingha d’Humalda Frisius-9-*

Lucas van Hoff Groninganus-9-=

Sibrandus Wygara Frisius-9-*

Gabinius a Meynsma Frisius-9-*

Wopko a Wygara occidentalis Friso-9-*

Joannes Wichers Groninganus-9-=

Jacobus a Wieringa Groninganus-9-=

Fredericus ab Inthiema Frisius-9-*

Johan Lewe d’Omlande-9-=

Tjallingus ab Eyssinga Frison-9-*

Bernardus Gruys nobilis Groninga-Frisius-9-=

François d’Eyssinga Frison-9-*

Abrahamus Wichers Groningensis-9-=

Gellius a Bruynsma Frisius Leovardiensis-9-*

Horatius ab Hobbema Frisius Snecanus-9-*

Jacobus Nicolay Leovardiensis Frisius-9-*

Teotardus ab Aylva nobilis Frisius-9-*

Johannes Isbrandts Groninganus-9-=

Joest Lewe Groningensis Omblandus Frisius-9-=

Andreas Ludolphi Groninganus-9-=

Luirdt Manningha Groninga-Omlandus-9-=

Arnoldus van Nyeveen Groninganus-9-=

Jacobus Heemstra Harlinga-Frisius-9-*

Johan Coenders Groninganus-9-=

Samuel Emmius V.N. Groninganus-9-=

Rembertus d’Mepsche Groninganus-9-=

Johannes Coenders Groninganus-9-=

Wigerus Hemminga Leovardia-Frisius-9-*

Jacobus Caesarius Harlinga-Frisius-9-*

Focco Hoisum Omblandus-9-=

Coppen D’Embda Groninganus-9-=

Edzardus Ripperda Omlandus-9-=

Franciscus Junius F.N. Groninganus-9-=

Jetzo Sminia Ackroniensis Frisius occidentalis-9-*

Scato Gockinga Groninga-Frisius-9-=

Ludolphus Conders Groninga-Frisius-9-=

Henricus Ludolphus Gockinga Groninga-Frisius-9-=

Arent Ludolph Gockinga Groninga-Frisius-9-=

Johannes Louwens Groninga-Frisius-9-=

Johan Tammen Groninga-Frisius-9-=

Justus Christophorus Polman Groninga-Omblandus-9-=

Rudolphus Polman Groninga-Omblandus-9-=

Johannes Rembartus Clant Omlandus-9-=

-9-Pays-Bas : Frise, Groningue

Frise occidentale, Leeuwarden-9-*

Groningue-Ommelanden-9-=

1651-1660

Petrus Brouwer Leovardia-Frisius-9-*

Henricus Mamminga Leovardia-Frisius-9-*

Reint Alberda Omlandus-9-=

Sixtus Eyssinghe Groninganus-9-=

Melchior Adrianus ab Lissebon Omlandus-9-=

Joannes Aloysius Buckhorst Groninganus-9-=

Cornelius Rotgers Groningo-Frisius-9-=

Joannes Sisen Groninga-Frisius-9-=

Joannes Mees Groninga-Frisius-9-=

Lambertus C. Staackmans Groninganus-9-=

Wicherus Wichers Groninganus-9-=

Idzardus Josephus ab Albada nobilis Friso Snecanus-9-*

Sixtus van Emingha Fryson Leeuwarden-9-*

Reinolt Clinge nobilis Groninganus-9-=

Bernardus de Sighers nobilis Groninganus-9-=

Assuerus a Grovestin nobilis Frisius occidentalis-9-*

Remmert van Berum nobilis Omlandus-9-=

Wilhelmus Alberda Omlandus nobilis-9-=

Rudolph Schaffer nobilis Omlandiae-9-=

Joachim de Sighers nobilis Groninganus-9-=

Jacobus Swartte Groninganus Belga-9-=

Warnerus Emmen Groninga-Frisius-9-=

Johannes Edzardus a Douma nobilis Frisius-9-*

Onias Geldorpius Leovardiensis Frisius-9-*

Habbo Gruis Groninga-Omlandus-9-=

Habbo Aldringa Groninganus-9-=

Berent de Sighers Groningensis-9-=

Rodolphus Molerus Groninga-Frisius-9-=

Bernard de Berum Ommelandus-9-=

-9-Pays-Bas : Frise, Groningue

Frise occidentale, Leeuwarden-9-*

Groningue-Ommelanden-9-=

1661-1670

Gisbertus a Vierssen Leovardiensis Frisius-9-*

Petrus Cluivinghe Groninganus-9-=

Nicolaus Joannis Sixti Leowardiensis Frisius-9-*

Jodocus Valcke Groninganus-9-=

Ritzæus Homerus Groninga-Oldamptinus-9-=

Elias Soblet Franequarensis Frisius-9-*

Sibrandus Hoitsma Leoverdia-Frisius-9-*

Hommo Wilcken van Mensuma Groninganus-9-=

Berent Aldringa Hagiensis [Groningensis]-9-=

Henricus Swartte Groninga-Frisius-9-=

Franciscus a Burum Leoverdia-Frisius-9-*

Henricus Piccardtus Groninga-Frisius-9-*

Janus Coelius Olmius Damona-Frisius-9-*

Johannes Holwarda Leoverdia-Frisius-9-*

Elco Gravius Leovardia-Frisius-9-*

Nicolaus Poutsma Leoverdiensis Frisius-9-*

Ajoldus Cromholt Groninganus-9-=

Eppo Leonardi a Veencamp Groninga-Omlandus-9-=

Pieter Sickinghe Groninga-Omlandus-9-=

Arnoldus a Bolten Frisius-9-*

Otto a Bolten Frisius-9-*

Jacobus Hasius Frisius-9-*

Franciscus Jorritsma Frisius-9-*

Joachimus Ludovicus Strasbourg Groninga-Frisius-9-=

Bernhard Christophori Groninga-Frisius-9-=

Wesselus Commenes Groninga-Frisius-9-=

Gerardus van der Lely Leoverdiensis Frisius-9-*

Jacobus Lieftinck Groninganus-9-=

Johannes van Borck Groninganus-9-=

Eppo Harckens Groninganus-9-=

Albertus Munningh Groninganus-9-=

Ludolphus Wichers Groninganus-9-=

-9-Pays-Bas : Frise, Groningue

Frise occidentale, Leeuwarden-9-*

Groningue-Ommelanden-9-=

1671-1680

Eg[bertus] Clant Groninga-Ommelandus-9-=

Gisbertus Edingh Groninganus-9-=

Hermannus Huber Franequera-Frisius-9-*

-9-Pays-Bas : Frise, Groningue

Frise occidentale, Leeuwarden-9-*

Groningue-Ommelanden-9-=

1681-1689

Adolph van Idsinga Frisius-9-*

Wilco Holdinga baron de Schwartzenberg Frisius occidentalis-9-*

Wicherus Pott Groninganus-9-=

Baroldus Knock Groninganus-9-=

-9-Pays-Bas : Frise, Groningue

Frise occidentale, Leeuwarden-9-*

Groningue-Ommelanden-9-=

1721-1781

Nicolaus Xaverius Heerkens Groninganus, 25 maji 1757, J.U.D.-9-=

-10-Pays-Bas : Drenthe, Overijssel, Gueldre, Utrecht

Drenthe-Overijssel-10-*

Gueldre-10+

Utrecht-10-=

1602-1610

Gerhardus de Lieuwen Ultrajectinus-10-=

Charles de Gelder Aernhemiensis Geldrus. Hic obiit anno 1603, 20 januarii-10-+

Gerardus H. Reinen Steenvicensis-10-*

Everardus ter Stege Steenwicensis Transisulanus-10-*

Balthasarus Vossius Ultrajectinus-10-=

Joannes Goyerus Ultrajectinus-10-=

Jacobus de Gouda a Zwindrecht Ultrajectinus, J.U.D.-10-=

Joannes a Pallant Geldrus Arnhemiensis-10-+

Theodorus Cockius Ultrajectinus-10-=

Pelgromius a Zyll Vianensis-10-=

Guilielmus a Scherpenseell Geldrus-10-+

Joannes a Lochteren Zutphaniensis-10-+

Fredericus Sandius Geldrus-10-+

Justinus de Meyer (Weyer) Geldrus-10-+

Joannes van Blom Ultrajectinus-10-=

Rycmannus Wolphius Transissulo-Zwollanus-10-*

Reinerus Schrassert Harderwico-Geldrus-10-+

Jacobus ab Asch a Wyck Ultrajectinus-10-=

Antonius Hesselsen Ultrajectinus-10-=

Theodorus Verheiden Daventriensis-10-*

Henricus Diminck Daventriensis-10-*

Rodolphus Stenbergen Vasensis Geldrus-10-+

Joannes a Beinhem Thiletano-Geldrus-10-+

Petrus a Naerden Ultrajectinus-10-=

Theodorus Zuylenus a Draekenburch nobilis Ultrajectinus-10-=

Assuerus a Brakel nobilis Ultrajectinus-10-=

Guilielmus Schade Trajectinus ad Rhenum nobilis-10-=

Adrianus de Roy Ultrajectinus Belga-10-=

Jacobus ab Asch Ultrajectinus Belga-10-=

Nicolaus Eng. f[ilius] Brouwerius Campensis-10-*

Matthias ab Eenschate Transisulanus-10-*

Cornelius ab Heteren Vyanensis-10-=

Nicolaus de Voocht Gueldrus-10-+

Henricus a Schroyesteyn Reno-Trajectinus-10-=

Joannes Vitellius vulgo Kelffken Noviomago-Geldrus-10-+

Petrus a Dornenborch Neomago-Geldrus-10-+

Antonyus Crantz Noviomago-Geldrus-10-+

Everardus Poitou Arnhemensis Geldrus-10-+

Henricus Zoudenbalch (Soutdenbalck) Tylanus-10-+

Melchior de Ruever Tilano-Geldrus-10-+

Johannes de Goch Zutphaniensis-10-+

Gerhardus Eilhardt Daventriensis-10-*

Johannes van der Haer no[bilis] Reno-Trajectinus-10-=

Gulielmus a Winssen Rheno-Trajectinus-10-=

Petrus Schaye Amersfortius-10-=

Wilhelmus a Duvenvoorde Gravensis Geldrus-10-+

Stephanus Helsdinghen Rheno-Trajectinus, J.U.D.-10-=

Cornelius Splinterus Ultrajectinus Belga-10-=

Jacobus van Wetthen, J.U.D., Geldrus-10-+

Gerhardus Mauritii Pannecouck Geldrus-10-+

Albertus a Limbergen Daventriensis Transisulanus-10-*

Antonius a Blocklant Antonii f[ilius] Ultrajectensis-10-=

Antonius van Schaeyck van Utrecht-10-=

[Jo] Broechuysen van Utrecht-10-=

Nicolaus Goyerus Belga Ultrajectinus-10-=

Theodorus a Lennep Sicamber-10-+

Hartgerus then Holt Doetinchemensis Geldrus-10-+

Laurentius Veen (Veer) Zutphaniensis-10-+

Antonius Hugienus Arnhemo-Geldrus-10-+

Gisbertus a Dompseler Amorsfortius-10-=

Adrianus G. f[ilius] Ploosius Ultrajectinus-10-=

Egbertus Roerinck Daventriensis-10-*

Hermannus Schimmelpenningk van der Oye Zutphanio-Geldrus-10-+

Johannes Kaldenbach Zutphanio-Geldrus-10-+

Henricus a Vreeswyck Ultrajectinus-10-=

Joannes ab Hell Zutphaniensis Geldrus-10-+

Henricus ab Hell Zutphaniensis Geldrus-10-+

Jacobus Bicollis Daventrius Transisselanus-10-*

Joannes von Raesfelt Transisulanias-10-*

Henricus a Colenberch Amersffurto-Ultrajectensis-10-=

Jacobus de Tuyll Geldrus-10-+

Joannes Strick Ultrajectinus-10-=

Lubbertus a Wynshem Zutphaniensis-10-+

Rutgerus de Boetzelaer a Toutenburch Transisulanus-10-*

Henricus Feith Elburgo-Geldrus-10-+

Helmichius Ketell Deveranus ex Drentia-10-*

Wolffgangus Adamus a Bicken in Haen Rhenensis-10-=

Lucas Jarghes a Steenwick Transisulanus-10-*

Robertus ter Beeck Zwollanus Transisulanus-10-*

Joannes ab Abcouda van Meerthen Ultrajectinus-10-=

Joannes de Munter Ultrajectensis-10-=

Bartolt de Ghendt Neomago-Geldrus-10-+

Henricus a Leeuwen Geldrus-10-+

-10-Pays-Bas : Drenthe, Overijssel, Gueldre, Utrecht

Drenthe-Overijssel-10-*

Gueldre-10+

Utrecht-10-=

1611-1620

Petrus Catzeus Arenaco-Geldrus-10-+

Jacobus van der Voort Trajectinus Belga-10-=

Engelbertus up ten Noorth Zutphanio-Geldrus-10-+

Nicolaus a Ghendt Geldrus-10-+

Josephus a Ghendt Geldrus (obiit)-10-+

Johannes Glummer Geldrus-10-+

Johannes a Brakel Zvollano-Transissulanus-10-*

Jacobus Ricardus Revius Daventriensis Transisalanus-10-*

Jacobus a Schoordyck Hollandus, dominus in Reinauwen-10-=

Alexander van Huesden Ultrajectinus-10-=

Henricus Zas a Weldam Montfortius-10-=

Adrianus Moll Montforto-Trajectinus-10-=

Florentius a Helder Geldrus-10-+

Henrick von Gentth de Flandre Utrecht-10-=

Fridericus a Driell Neomagensis-10-+

Otto ab Hemert-10-=

Gisbertus Elburgius Ultrajectinus-10-=

Joannes van der Haer ex Borne Tubantus-10-*

Gerardus ab Oestrum Woerdanus-10-=

Cornelius de Westrenen Ultrajectensis-10-=

Fredricus van de Sande Ultrajectinus-10-=

Theodorus a Zuylen Ultrajectinus-10-=

Johannes a Zuylen Ultrajectinus-10-=

Joannes a Pallaes Ultrajectinus,-10-=

Lubbertus a Pallaes Ultrajectinus, fratres-10-=

Rutgerus a Boetselaer Tranisulanus-10-*

Gerardus a Buchell Tilano-Geldrus-10-+

Ludovicus a Mulenborch Amorsfortius-10-=

Stephanus Conradi Zvollensis-10-*

Adrianus Craenhals ab Hottinga Transisulanus-10-*

Joannes Gregorius Stecke (*lecture incertaine*) Daventriensis-10-*

Casparus a Vieracker Geldrus-10-+

Joannes a Winsen Cuylenborganus Geldrus-10-+

Gerardus Donckelly Daventriensis-10-*

Albertus a Tongeren Aldenzalensis Transisulanus-10-*

Theodorus Oelen Aldenzalensis Transisulanus-10-*

Nicolas a Boecholt Daventriensis-10-*

Wilhelmus Merryenburgh Daventriensis-10-*

Adrianus a Mulenborch Amorsfortius-10-=

Adrianus de Sueserenghe Trajecto-Batavus-10-=

Gisbertus a Brienen Ultrajectinus-10-=

Plechelmus Keylewer Zwollanus Transissulanus-10-*

Winandus Berensen Daventriensis-10-*

Joannes Sychterman Daventriensis-10-*

Winandus Hacfort Arnemiensis-10-+

B. Billerus de Suchtelen Swollanus-10-*

Joannes Masius Tylano-Geldrus-10-+

Albertus de Booth alias Greven Zwollensis Transisulanus-10-*

Guiliame de Buetselaer Overisel Toutenburch supra Deventer-10-*

Gerardus van Remundt Noviomagensis-10-*

Julius Diderich von Steinwick ex Transisulanis Swollensis-10-*

Rutgerus ab Haersolte Transisulanus-10-*

Wolf Bentinck Transisulanus Zwollensis-10-*

Georgius Ittersum Zvollano-Transisulanus-10-*

Gisbertus Cremer ’s-Herenbergho-Gelder-10-+

Joannes a Vianen Ultrajectinus-10-=

Franciscus a Muylwyck Ultrajectinus-10-=

Rudolf van Steenwick Transisulanus-10-*

Fridericus a Baexen de Hermelen Ultrajectinus-10-=

Jacobus a Wynshem Zutphaniensis-10-+

Petrus Lansinck Zutphaniensis. *Décédé le 17 novembre 1619*-10-+

Joannes Bueher Zutphaniensis-10-+

Theodorus a Wall Zutphaniensis-10-+

Ægidius Nielandt Belga Daventriensis-10-*

Henricus Gelingius Transisulanus Daventriensis-10-*

Henricus Heidendal Doesborgensis Gelrus-10-+

Joos Vygh Tylanus-10-+

Aernt Vygh Geldrus-10-+

Cornelius de Jongh Geldro-Thyelensis-10-+

Reinerus Schaep Belga Transisalanus-10-*

Petrus a Steenbergen Gelder-10-+

Willem van Steelandt van Geldre-10-+

Arnoldus a Lingen Rheno-Trajectinus-10-=

Richardus a Coesvelt Ultrajectinus-10-=

Elbertus a Voorst Geldrus Arnhemiensis-10-+

Gerhardus Voeth Arnhemio-Gelrus-10-+

Nicolaus Verbolt Noviomago-Geldrus-10-+

Arnoldus Copius Vollenhovia-Transysalanus-10-*

Michael Bom a Cranenburgh Trajectinus-10-=

Henricus Magnus (Le Grand) a Vladraccen Bommela-Geldrus-10-+

Hilgerus Breull Rheno-Trajectinus-10-=

Everardus de Wede Rheno-Trajectinus-10-=

-10-Pays-Bas : Drenthe, Overijssel, Gueldre, Utrecht

Drenthe-Overijssel-10-*

Gueldre-10+

Utrecht-10-=

1621-1630

Walramus Pieck de Wolfswert Gelrus-10-+

Gisbertus a Brienen Arnhemio-Geldrus-10-+

Henricus Pieck Gelrus-10-+

Lubbertus Dinclagen Geldrus-10-+

Theodorus Quersen Transisulanæ-Daventriensis-10-*

Gerardus Scheppingius Transisulanus Zwollanus-10-*

Joannes die Ruiter Gelder ex Velavia-10-+

Winoldus de Campis Daventria-Transysulanus-10-*

Gerhardus Cremer Daventriensis-10-*

Martinus Stenbergen van der Moel Vasensis-10-+

Joannes Uptennoorth Zutphaniensis Geldrus-10-+

Ulricus a Groenscheid Wourda-Batavus, phil. et med. doctor-10-=

Nicolaus a Gendt Noviomago-Geldrus-10-+

Theodorus Modaeus Ultrajectinus-10-=

Jacobus le Petit Ultrajectinus-10-=

Franciscus de Wys Ultrajectinus-10-=

Fredericus Pinninck Daventriensis-10-*

Gerardus ter Beek Swollensis-10-*

Beerent van Ittersum Swollensis-10-*

Henricus a Donghen Zwollensis-10-*

Theodorus de Goyer Ultrajectinus-10-=

Gualtherus a Doyweert Boemela-Geldrus-10-+

Johannes a Benthem Tiela-Geldrus-10-+

Franciscus Muersius Bomelo-Geldrus-10-+

Lazarus a Zonst Lerdamo-Batavus-10-=

Cornelius Jongbloet Boemel-Geldrus-10-+

Arnoldt van Eeden Ultrajectensis-10-=

Hendrick van Eeden Ultrajectensis-10-=

Ryquinus ab Essen Gelderus-10-+

Elias a Weede Ultrajectinus-10-=

Nicolaus a Steenler Geldrus-10-+

Everardus Balck Daventriensis-10-*

Rychard van Suyllen van Nyevelt van der Nyckerck-10-=

Gerhardus ab Arler Velavo-Geldrus-10-+

Johannes a Breda Campensis-10-*

Joannes Gregori Arnhemio-Gelrus-10-+

Joannes Everwyn Arnhemio-Gelrus-10-+

Guinandus ab Ommeren Edano-Gelrus-10-+

Arnoldus Jordan Noviomago-Geldrus-10-+

Henricus Schrassert Hardervico-Geldrus-10-+

Otto Schrassert junior Hardervico-Geldrus-10-+

Joannes van Thoren Geldrus Oppynensis-10-+

Johannes a Dedem Hardervicensis Geldrus-10-+

Henricus a Rouwennoert Keppellensis-10-+

Jan van Ittersum Overisel-10-*

Henricus Rudolphi Vollenhova-Transissulanus-10-*

Gisbertus d’Ruever Rhenotrajectinus-10-=

Aernuldus de Ruever Rhenotrajecti[n]us-10-=

Jan Geurts van Vendeloo (famulus domini procuratoris)-10-+

Rodolphus Polman Stenvicens-Transisulanus-10-*

Bernardus Farreris Amisfurtius-10-=

Herbertus de Detten Ultrajectinus-10-=

Lambert de Gnenerberch (Quenerberch) Gueldrois-10-+

Adrianus Gisberti Pollio Bommelo-Geldrus-10-+

Guilielmus Paludanus Boemelo-Geldrus-10-+

Henricus Scherff Daventria-Transisulanus-10-*

Franciscus a Neede Ultrajectinus-10-=

Franciscus van der Burch Ultrajectensis-10-=

Georgius a Nyevelt Ultrajectinus-10-=

Wilhelmus ab Heuckelom Noviomago-Geldrus-10-+

Joannes Niportius Ultrajectinus-10-=

Gothofredus a Roy Tilanus Gelrus-10-+

Guilhelmus Kelffken Noviomago-Geldrus-10-+

Guillielmus van der Houve Noviomago-Geldrus-10-+

Johannes a Bilderbeeck Amisfurto-Trajectinus-10-=

Johannes de Millingen de Utrecht-10-=

Eustathius Pyeck de Geldre-10-+

Ægidius Pyeck de Geldre-10-+

Henricus van Wou Ultrajectensis-10-=

Cornelius a Twenhuysen Zwolla-Transisulanus-10-*

Reinerus de Beyer Noviomagensis Geldrus-10-+

Gerardus ab Hunteler Borgensis Geldrus-10-+

Godefridus a Meerveen Ultrajecto-Amisfurtensis-10-=

Joannes a Dashorst Ultrajecto-Amisfurtensis-10-=

Rodolphus Wierus Svollensis Transissulanus-10-*

Henricus Temminck Daventria-Transisulanus-10-*

Abelus Moda Couverdanus-10-*

Joachim Blancken Batavo-Geldrus-10-+

Henricus Blancken Batavo-Geldrus-10-+

Rutgher van Els van Rumpt uyt Gelderlant-10-+

Diodorus de Leeuw Ultrajectinus-10-=

Thomas Logesius Daventriensis-10-*

Theodorus Singendonck Noviomago-Geldrus-10-+

Guilla[u]me Angelberst van Vasen wt Gelderlant-10-+

Henricus Richters Swollanus-10-*

Jacobus Gessel Zvollensis-10-*

Joannes de Roover Masevalensi-Geldrus-10-+

Gerardus de Roover Masevalensi-Geldrus-10-+

Gisbertus Bosman Ultrajectinus-10-=

Hermannus Ryswick Noviomagus-10-+

Lambertus Louwerman Zutphaniensis Geldrus-10-+

Paulus Sels Zutphaniensis Geldrus-10-+

Cornelius a Middelcoop Ultrajectinus-10-=

Jacobus Boll de Hamersfelt Ultrajectinus-10-=

Guilelmus Liesvelt Ultrajectinus-10-=

Jacobus Godin Ultrajectinus-10-=

Fredericus a Twickell Daventria-Transisulanus-10-*

Walramus Blancken Batavo-Geldrus-10-+

Jacobus Schimmelpenninck van der Oy Gelrus-10-+

Joannes Rauwers Zutphano-Geldrus-10-+

Joannes a Someren Ultrajectinus-10-=

Gerhardus a Lövenich Holtensis-10-*

Arnoldus a Wynbergen Zutphaniensis-10-+

Joannes Leo Bommelia-Geldrus-10-+

Bartolt van Gendt dominus de Wolfferz Batavus-Geldrus-10-+

Guilielmus a Gendt Batavus-Geldrus-10-+

Johannes Wicherlinck Zwolla-Transissulanus-10-*

Carolus Hiddinck Rolda-Drentinus-10-*

Gualtherus Schutten Zutphaniensis Gelrus-10-*

Johannes Gabry Ultrajectinus-10-=

Joannes a Billich Culenburganus-10-+

Valentinus de Vianen Ultrajectinus-10-=

Fredericus Rasinck Geldrus-10-+

Johannes a Dulmen Geldro-Velavicus-10-+

Joannes Baxcamp Tylanus Geldrus-10-+

Joannes a Zeller Noviomago-Geldrus-10-+

Ghisbert van Schendel van Utrecht-10-=

Guilielmus a Gennip Zevenaria-Clivensis (mortuus est Antwerpiae hinc in patriam rediens)-10-+

Reinerus Mockinck Borgo-Geldrus-10-+

Hermannus ten Poll Zutphano-Geldrus-10-+

Johannes Hofstadt Zutphania-Geldrus-10-+

Joachimus Weninck Zutphano-Gelrus-10-+

Richart Lantingh Swollensis-10-*

Everardus Wynhoff Zutphano-Geldrus-10-+

Guilielmus Hoezelman Zutphaniensis-10-+

Wycherus Wybrant ten Poortinge Stenvico-Transisulanus-10-*

Arnoldus a Bolten Transisulanus Zvollensis-10-*

Henricus ab Essen Hardervico-Gelrus-10-+

Theodorus Schrasser Ultrajectinus-10-=

Petrus van der Burch Ultrajectensis-10-=

Henricus Crato, Elburgo-Geldrus-10-+

Guilielmus Franciscus a Camonts Swollensis-10-*

Antonius Kuyck de Veen-huyse Ultrajectinus-10-=

-10-Pays-Bas : Drenthe, Overijssel, Gueldre, Utrecht

Drenthe-Overijssel-10-*

Gueldre-10+

Utrecht-10-=

1631-1640

Isaacus Moll Vianensis ad Leccam-10-=

Libertus Opstraidt van der Moelen Ultrajectinus-10-=

Johan van Middelcoop Ultrajectinus-10-=

Wilhelmus ter Beeck Clivo-Sevenariensis-10-+

Joannes a Westrenen Amisfurtensis patria Ultrajectensis-10-=

Henricus Bor Trajectinus-10-=

Ludovicus de Voocht Geldrus-10-+

Guillielmus Baerle Ultrajectinus-10-=

Henricus Abbingh Zutphaniensis-10-+

Jacob van Staverden Arnhemio-Gelrus-10-+

Joannes Goris Batavo-Gelrus-10-+

Hendericus van Middachten de Daventria-10-*

Joannes van der Meer Reno-Trajectinus-10-=

Guilielmus Ploos Ultrajectinus-10-=

Henricus a Basten Winterswichio-Geldrus-10-+

Vonkius a Mehen Velavio-Geldrus-10-+

Jacobus ab Wtterwyck Svollanus-10-*

Heymannus Niportius Ultrajectinus-10-=

Hermannus ab Hell Geldrus. *Assassinat sur la personne de Hermann de Hell*-10-+

Otto a Wylich Clivensi ducatu oriundus Gennipensis, 1632-10-+

Henricus Opstraet Ultrajectinus-10-=

Wilhelmus de Lamsweerde Daventriensis-10-*

Arnoldus van den Berch Noviomago-Geldrus-10-+

Petrus a Loemel Ultrajectinus-10-=

Everhardus Everwyn Arnhemiensi-Gelrus-10-+

Petrus a Leeuwen Ultrajectinus-10-=

Christophorus Joannes Bresson Oldenzaliensis Transisulanus-10-*

Hermannus ten Berch s’Herenbergensis Geldrus-10-+

Cornelius Dierout Rheno-Trajectinus-10-=

Wilhelmus a Drueten Tyla-Geldrus-10-+

Gerrit Kreynck de Averlaer Gueldrois-10-+

Joannes Kelffken Neomago-Geldrus-10-+

Martinus a Sypesteyn Ultrajectinus-10-=

Franciscus van de Poll Ultrajectinus-10-=

Adrianus Heurnius Ultrajectinus-10-=

Joannes Portenghen Ultrajectinus-10-=

Gulielmus WtdenBogart Ultrajectinus-10-=

Henricus de Lochteren Batavus (Zutphen ?)-10-+

Johannes ab Hövel Tyla-Geldrus-10-+

Joannes a Westrenen Rheno-Trajectinus-10-=

Jacobus Vriesen Swolla-Transisulanus-10-*

Henricus Schrieck Ultrajectensis-10-=

Arnoldus van der Burch Ultrajectensis-10-=

Anthony van Hovensen van Zwolle-10-*

Adrianus Cockengen Bommelano-Geldrus-10-+

Clemens Gesselius Trajecto-Amisfurtensis-10-=

Guernerus a Bronchorst Trajecto-Amisfurtensis-10-=

Michael Darmel (Dormel) Neomago-Gelrus-10-+

Mauritius van Steenwyck Ultrajectinus-10-=

Joannes a Schrieck Daventriensis Transissulanus-10-*

Lambertus Quadacher Daventriensis Transisulanus-10-*

Laurentius Neiendalius Ultrajectinus-10-=

Gerardus ab Halle Gelro-Borculoensis-10-+

Bartholdus Couper Gora-Tubantus-10-*

Cornelius van Ryn Culenburgensis-10-+

Nicasius de Sille Arenaco-Sicambrus-10-+

Jacobus de Berghes ten Essendelle-10-=

Petrus Hardenberch Ultrajectinus-10-=

Alardus ab Hackfort Geldro-Twellensis-10-+

Adolphus a Rensen Transisulanis-Oldensaliensis-10-*

Franciscus van der Lynden Neomago-Gelrus-10-+

[Joannes] Schadé Ultrajectinus-10-=

Guilielmus de Groenhout Vyanensis-10-=

Bitterus van der Marssche Ultrajectino-Batavus-10-=

Henricus Lansinck Lochemio-Gelrus-10-+

Christianus Comans Transisulanus-10-*

Gerhardus Kreynck Zutphano-Gelrus-10-+

Borchardus ab Oer Transisalanus-10-*

Henricus Nilant Davunturio-Transisulanus-10-*

Arnoldus Schlaun Westerfordio Geldrus-10-+

Cornelius Schlaun Westerfordio-Geldrus-10-+

Johannes Veen Transisulanus Campensis-10-*

Carolus a Zyl Aspera-Batavus-10-+

Pontianus Singendonck Noviomago-Geldrus-10-+

Martinus Meyster Rheno-Trajectinus-10-=

Petrus van der Cloes Ultrajectinus-10-=

Joannes a Coverden Daventriensis Transysulanus-10-*

Zigerus ter Stege Steenvico-Transisulanus-10-*

Bartoldus Arens Steenvico-Transisulanus-10-*

Antonius Goris Neomago-Gelrus-10-+

Jacob von Munster her zu Krecktinck ende Malsen auss Geldertlandt-10-+

Joannes a Coerbeck Doetinchemio-Geldrus-10-+

Jan van Twickello Transisulanus-10-*

Martinus Boelen Daventria-Transisulanus-10-*

Everhardus Vogell Tyla-Geldrus-10-+

Petrus Sels Zutphania-Geldrus-10-+

Gerhard von Vinkeln Husser-Cliveus-10-+

Henricus Mulert Transisulanus-10-*

Jacobus de Cranen van Haeften Trajecto-Batavus-10-=

Jhoan Vianen van Haersvelt Trajecto-Batavus-10-=

Nicolaus Ploos van Amstel Trajecto-Batavus-10-=

Cornelius de Brouchuisen Ultrajectinus-10-=

Henricus a Trier Gelro-Borculoensis-10-+

Georgius Guilielmus Lipperus Daventria-Transisulanus-10-*

Allardus Hellendoern Daventria-Transisulanus-10-*

Jo. Wtenbogaert Ultrajectinus-10-=

Nicolaes van der Marck Ultrajectinus-10-=

Henricus Ploos ab Amstel Ultrajectinus-10-=

Philippus Nykerck Zwolla-Transisulanus-10-*

Arnold George de Haersolte Zwolla-Transisulanus-10-*

Bartholomæus van Munster Neomagensis-10-+

Balthazar Augustinus van Winterswyck-10-+

Gerardus de Reede de Renswoude Ultrajectinus-10-=

Arnoldus a Blomendall Geldrus-10-+

Nicolaus ten Have Swolla-Transisulanus-10-*

Christianus Rodenburch Ultrajectinus-10-=

Gerardus Wernherius Herdrovici-Gelrus-10-+

Th[omas] de Starckenborch Ultrajectinus-10-=

1. van Aeswyn Ultrajectensis-10-=

Johannes Schellart de Oppendorp liber baro in Dorrenverdt, anno 1640-10-+

Otto Marienburch Daventria-Transisulanus-10-*

Alexander Bentinck Arnaco-Gelrus-10-+

Henricus a Coverden a Wegdam Transisulanus-10-*

Hubertus van Rynouwen Ultrajectinus-10-=

Cornelius a Zallant Geldrus-10-+

Jean de Cock van Oppynen van Thiel-10-+

Melchior de Cock van Oppynen van Thiel-10-+

-10-Pays-Bas : Drenthe, Overijssel, Gueldre, Utrecht

Drenthe-Overijssel-10-*

Gueldre-10+

Utrecht-10-=

1641-1650

Caspar van Lynden van Boulenham Geldrus-10-+

Thomas van Wyckersloot Ultrajectinus-10-=

Gerardus Pyll Viana-Batavus-10-=

Adrianus ab Arckel Woerda-Batavus-10-=

Gerhardus ter Stege Steenvico-Transisalanus-10-*

Henricus Wolphius Transisalanus-10-*

Johannes Buis Zvolla-Transisalanus-10-*

Joannes ab Echten Drentinus-10-*

Albertus Ketwich Rusius Drentinus-10-*

Hermannus Weninck Winterswicensis Gelrus-10-+

Johannes van Essen Zutphaniensis-10-+

Petrus ab Helsdinghen Ultrajectinus-10-=

Assuerus Hornhoven Ultrajectinus-10-=

Guilelmus Albertus Greve Swolla-Transisulanus-10-*

Joannes Engelss Twentianus-10-*

Berenhard Sloer Deventer-10-*

Willem Volmer van Wenterswyck-10-+

Henricus Eygel Arenaco-Gelrus-10-+

Joannes Rusius Drentinus-10-*

Mattheus Romswinckel Zevenarius-10-+

Arnoldus ab Appelthorn Diepstegensis ex comitatu Herenbergensi-10-+

Gerhardus Essenius Geldrus-10-+

Joannes Sloot Campensis Transisulanus-10-*

Johannes Westerborg Ultrajectinus-10-=

Rodolphus ab Ommeren Arenaco-Gelrus-10-+

Arnoldus Albertus de Vries Campensis-10-*

Richardus a Bolten Swollanus-Transisulanus-10-*

F[ridericus] Renesse de Mal Ultrajectensis-10-=

Ambrosius Roosmalen Ultrajectinus-10-=

Antonius Ovelinnck Grollensis-10-+

Franco Pollio Boemelo-Geldrus-10-+

Johannes de Cocq Boemelo-Geldrus-10-+

Gerardus van Pallaes Rheno-Trajectinus-10-=

Joannes van Bronchorst Trajecto-Amisfurtius-10-=

Antonius Foyert de Lienden Batavo-Gelrus-10-+

Johan van Drueten nobilis Geldrus Neomagensis-10-+

Joannes Tryst Neomagensis Geldrus-10-+

Richardus ter Brugghen Rheno-Trajectinus-10-=

Jacobus ab Aerdt Dima Zutphaniensis-10-+

Jan van Aerdt Dima Zutphaniensis-10-+

Ignatius Knippenborch Zutphania-Geldrus-10-+

Joannes Bosch Zwolla-Transisulanus-10-*

Ghisbertus van Blieel (Blyeel) Wourda-Batavus-10-=

Josias van Harn Arenaco-Gelrus-10-+

Johannes Goris de Bommel Geldrus-10-+

Gerhardus ab Anssum Gendringa-Geldrus-10-+

Bernardus d’Reiger Delda-Tubantus-10-*

Ægidius Nicolai Noviomagus-10-+

Johannes a Marhulsen Arnhemiensis-10-+

Anthoine de Goyer Ultrajectensis-10-=

Hermannus Schuttenius Zutphaniensis-10-+

Petrus a Dam Ultrajectinus-10-=

Nicolaus Haninck Drentinus-10-*

Henricus Brugginck Zutphaniensis-10-+

Johannes Everhardus a Remen Zutphaniensis-10-+

Joannes de Bye Gueldro-Noviomagus-10-+

Johannes van der Beeck Zwolla-Transisulanus-10-*

Johannes Beckingius Versevelda-Gelrus-10-+

Gisbertus de Frens a Lostadt Rheno-Trajectinus-10-=

Martin de Quade Daventria-Transisulanus-10-*

Lucas Lipperus Daventria-Transisulana-Zallandus-10-*

Bernardus Ryckwins Clivo-Zevenaerensis-10-+

Wilhelmus Mode Ultrajectinus-10-=

Cornelius Rossum Ultrajectinus-10-=

Rudolphus Moringhus Rheno-Trajectinus-10-=

Paulus Busius Transisulanus, J.U.D.-10-*

Arnoldus a Boecholt Transysulanus-10-*

Quirinus Wolters Drusiburgensis Geldrus-10-+

Gerardus a Zelst Dotinchemio-Geldrus-10-+

Gaspar de Brakel baron de Blieckenberch Trajectinus-10-=

Mathaeus de Tour Ultrajectinus-10-=

Johannes a Brakel Zwolla-Transisulanus-10-*

Wilhelmus a Brakel Zwolla-Transisulanus-10-*

Beuckel ter Borch Zwolla-Transisulanus, J.U.D.-10-*

Johannes Calencamp Borkeloa Gelrus-10-+

Guilielmus Canter Ultrajectinus, med. et phil. doctor-10-=

Maximilianus Breyerus Ultrajectinus, J.U.D.-10-=

Guilielmus ab Estvelt Geldrus-10-+

Reinerus ab Espeloe Transisulanus-10-*

Arnoldus van Bolten Swollanus-10-*

Gedro Ormea Ultrajectinus ad Renum-10-=

Arnoldt van Espello van Overisel-10-*

Joannes Hulst Oldenzalia-Transisulanus-10-*

Matthias de Grati Trajectinus (Mosa-Trajectinus ?)-10-=

Guilielmus van Holt Doetichemio Geldrus-10-+

Frederick van Reede tot Aemerongen in Trajecto-10-=

Conradus Klerck Noviomago-Geldrus-10-+

Wilhelmus Water Neomago-Geldrus-10-+

-10-Pays-Bas : Drenthe, Overijssel, Gueldre, Utrecht

Drenthe-Overijssel-10-*

Gueldre-10+

Utrecht-10-=

1651-1660

Wilhelm Huyghens Arnhem-Gelrus-10-+

Bartolomeus Huygens Arnhem-Gelrus-10-+

Theodorus Barlen Holtensis-10-*

Johannes Baptista van der Heiden ex castro Middelerano-10-+

Robert de Heerdt Overysel-10-*

Boldewyn von Haen Overysel-10-*

Wilhelmus Nilant Daventria-Transissulanus-10-*

Johannes ten Behm Zutpheno-Geldrus-10-+

Emmanuel van Twenhuysen Zwolla-Transisulanus-10-*

Bernhardus a Bocholt Transisulanus-10-*

Cornelius van Hervelt Neomago-Gelrus-10-+

Jacobus Poth van Woninck Amersfurto-Trajectinus-10-=

Engelbertus Albertus van Doetinchem ex ……………… Transisulanus-10-*

Henricus Hagheman Noviomago-Gelrus-10-+

Frederich van Isendoorn van Amersfort-10-=

Joannes ten Dam Gora-Transisalanus-10-*

Fredericus van der Capellen Gelrus-10-+

Gulielmus Thomæus Neomago-Gelrus, J.U.D.-10-+

Guilielmus Goseman Clivo-Gennepiensis-10-+

Alexander Wilhelmus ab Herten de Aenholt-10-+

Georgius Cremer de Boxmeer-10-+

Theodorus Elandus Ultrajectensis-10-=

Johan de Bye eques dominus in Wadesteyn-10-+

Cornelius a Wyckersloot Ultrajectinus-10-+

Everhardus Bouwer Daventria-Transissulanus-10-*

Rodolphus Weddinck Wenterswico-Gelrus-10-+

Rotgerus de Graes Wenterswico-Gelrus-10-+

H. van Tuyl van Serooskercke nobilis Ultrajectinus-10-=

Joan van Sonsbeek Wyha-Transissulanus-10-*

Jacobus van Coesvelt Ultrajectinus-10-=

Georgius Ripperda Gelro-Batavus-10-+

Jacobus Muys Arenaco-Gelrus-10-+

Georgius Theodorus a Lestemaecker Daventriensis-10-*

Jacobus Gerardus Cremers Daventriensis-10-*

Guilielmus a Langen Clivo-Teisterbantus-10-+

Joannes Alexandrinus a Meerveen Amersfortio-Ultrajectensis-10-=

Albertus Louwerman Zwolla-Transisulanus-10-*

Johannes Dotingh Drentinus-10-*

Gerardus Hermannus de Laer Transisulanus-10-*

Antonius Wyntgis Daventria-Transalanus-10-*

Jacobus Reepmacherius ffortensis [?]-10-=

Jacobus a Ryssen Daventriensis-10-*

Johann Bartholdus ab Ittersum zu Gerner Swolla-Transysulanus-10-*

Joannes Branzen Arenaco-Geldrus-10-+

Henricus ter Borch Daventria-Transisulanus-10-*

Florens Otto Hendrick liber baro de Bylandt et Reydt-10-+

Ernestus Albertus ab Hoen ex Geldria-10-+

Wilhelm Pieck Gelderlant-10-+

Isaacus a Mabuygen a Rojesteyn Ultrajectensis-10-=

Hermannus Queisen Zwolla-Transisalanus-10-*

Petrus van Quarebbe Ultrajectinus-10-=

Henricus Quellenburgh Ultrajectinus-10-=

Gosuinus Hogers Daventriensis-10-*

Ægidius Block Ultrajectinus-10-=

Fridericus ab Heuckelom Noviomago-Gelrus-10-+

Wilhelmus Aloysius Swaaffken Transisulanus-10-*

Conradus Wolphius Zwollanus-10-*

Joannes Gisbertus Vermeer Batavo-Gelder-10-+

Gerardus Herman[n]us a Munster Noviomagensis Geldriae provinciae-10-+

Hugo Andre Ruysch Hollandus [?]-10-=

Renier Swaaffken Transissulanus-10-*

-10-Pays-Bas : Drenthe, Overijssel, Gueldre, Utrecht

Drenthe-Overijssel-10-*

Gueldre-10+

Utrecht-10-=

1661-1670

Henderich Swaaffken Averissel Deventer-10-*

Corn. Alconius a Sypesteyn Ultrajectensis-10-=

Johannes Saeghman Leerdammensis-10-=

Joest Christoffer van Bevervoerde Overyssel-10-*

Jacobus Haeck Zevenharia-Clivensis-10-+

Fredericus Zaunslifer Amersfurtensis-10-=

Adrianus van Lommersom Ultrajectinus-10-=

Wilhelm Henrich Schele Tubantus-10-*

Otto Jacobus Temminck (Gelre ?)-10-+

Michael a Basten Winterswichio-Gelrus-10-+

Everardus Booth Ultrajectinus-10-=

Wilhelmus Booth Ultrajectinus-10-=

Theodorus Bor Amisfurto-Trajectinus-10-=

Godefridus Smitt Doesburgo-Gelrus-10-+

Eduardus van Voorst Ultrajectinus-10-=

Gerardus Renssen Dotinchemio-Gelrus-10-+

Johan van Eck Tyla-Gelrus-10-+

Hermannus Ten Winckell Ootmarsia-Transisulanus-10-*

Petrus van Baecke Ultrajectinus-10-=

Gosuinus Wesselus Denekamp Daventria-Transysulanus-10-*

Henricus van der Linden Noviomago-Gelrus-10-+

Cornelius de Ruever Trajectinus-10-=

Jacobus de Ruever Ultrajectinus-10-=

Bernardus Wyer Transisulanus Svollensis-10-*

Richard de Cruchten Geldro-Batavus-10-+

Everhardus Ilsinck Doetinchemio-Geldrus-10-+

Arnoldus Sluysken Hardervico-Gelrus-10-+

Alardus Gosuini van Elderom Sambeeckensis-10-+

Joannes Mulert Zwolla-Transyssalianus-10-*

Lucas Nilant Zwolla-Transissulanus-10-*

Berent Voet Zwolla-Transisulanus-10-*

Gerardus Antonius Janninck Covordiensis-10-*

Alexander de Moliaert Ultrajectinus-10-=

Guilielmus van Varick Cuyckensis-10-+

Alexander de Molyaerd Ultrajectinus (iterum adest)-10-=

Johan van Gessel Ultrajectinus-10-=

Theodorus van Zutphen Ultrajectinus-10-=

Cornelius Almeloveen Ultrajectinus-10-=

Johan Wolfsen Zwollanus-10-*

Coenraet Wolfsen Zwolla-Transisulanus-10-*

Egbert ter Welberg Daventria-Transisulanus-10-*

Henricus Ludolphus de Haen Graviensis-10-+

Godofridus Ignatius Martini Neomagensis-10-+

Johannes Leweens Neomago-Gelrus-10-+

Johannes ab Essen Zutphaniensis, 15 januarii 1671-10-+

-10-Pays-Bas : Drenthe, Overijssel, Gueldre, Utrecht

Drenthe-Overijssel-10-*

Gueldre-10+

Utrecht-10-=

1671-1680

Gerardus Pyll [?]-10-=

Henricus a Duren Daventria-Transisalanus-10-*

Conrardus a Wevelinchoven Vianensis-10-=

Hubertus Franciscus van Loenen Amisfurtensis-10-=

C.H. Lemker Vollenhovio-Transisulanus-10-*

Petrus Henricus de Ravenswaey Ultrajectinus-10-=

Arnoldus de Ravenswaey Ultrajectinus-10-=

Gaspar Cornelis Schade Rheno-Trajectensis-10-=

-10-Pays-Bas : Drenthe, Overijssel, Gueldre, Utrecht

Drenthe-Overijssel-10-*

Gueldre-10+

Utrecht-10-=

1681-1689

H.C. Sigers ther Borgh Drhentinensis-10-*

Rutgerus van Deventer Alldensalia Tubantinus-10-*

Meinhardus van Eylus Arnhemensis-10-+

Severinus Poelman … Westphalus-10-+

Johan van Brienen Arenaco-Geldrus-10-+

Arnoldus Lemker Vollenhovia-Transisulanus-10-*

Ignatius Henricus Theodorus ab Horst [?]-10-+

Unico de Twickello Daventriensis-10-*

Bernhardus Wilhelmus Valck Zutphaniensis-10-+

Seth Verbruggen Ultrajectinus Batavus-10-=

B. de Gruyter Ultrajectinus-10-=

J. de Gruyter Trajecti ad Rhenum-10-=

Isaacq Moll Ultrajectinus-10-=

Johan Wicherlinck Zwolla-Transisulanus-10-*

Cornelius Verhoeff Zwolla-Transisulanus-10-*

-10-Pays-Bas : Drenthe, Overijssel, Gueldre, Utrecht

Drenthe-Overijssel-10-*

Gueldre-10+

Utrecht-10-=

1721-1781

----------------------

-11-Pays-Bas : Hollande

Hollande-Septentrionale-Westfrise-11-&

Amsterdam-11-+

Amsterdam-Compagnie néerlandaise des Indes orientales (VOC)-11-++

La Haye-11-=

Hollande-Méridionale-11-$

1602-1610

Reynerus Brassicanus Cool Goudanus Batavus-11-$

Gerardus Brassicanus Cool Delphensis Batavus-11-$

Anselmus Bolle ab Hamersfelt Hago-comitanus Hollandus-11-=

Theodorus ab Alckemade Amsterodamensis-11-+

Adrianus Cornelii Boogaart Batavus Delphensis, J.U.D.-11-$

Cornelius Goesius Delphensis Batavus-11-$

Simon van Veen Batavus Alcmarianus, J. lic.-11-&

Caesar Bovetis Batavus Hagiensis, J.U.D.-11-=

Cornelius Busius Lugduno-Batavus-11-$

Gisbertus Culemburg Amstelredamensis-11-+

Pelgromius a Zyll Vianensis-11-$

Cornelius Haghen Batavus [?]-11-$

Cornelius Henr[icus] Vinckius Batavus [?]-11-$

Joannes Plettenburch Batavus Loevesteiniensis-11-$

Johannes Hamel Hollando-Hagiensis-11-=

Theodorus Hamel Hagiensis-11-=

Matthias Oudenstein Al[c]merianus-11-&

Augustinus (*ou* Joannnes) Stalpert van der Wielle Hagiensis-11-=

Menander Semeius Enchusanus Belga-11-&

Adamus Jacobi van der Aa Delfensis-11-$

Henricus Beucklar Amstelredamiensis-11-+

Cornelius de Davelaer Amsterodamus Batavus-11-+

Jacobus Arnoldi de Graeff [Delphensis]-11-$

Andreas de Cocq Hagiensis Batavus-11-=

Jacobus de Jonge Hagiensis Batavus-11-=

Johannes Benning Amsterodamensis-11-+

Joannes Belgens (Beloens) Valckenburgensis [?]-11-$

Nicolaus van Sorgen Battavo-Delphensis-11-$

Nicolaus van Swieten Hollandus-11-$

Hugo van Swieten Hollandus-11-$

Christianus ab Hardiexvelt Hollandus-11-$

Dominus Jobbensis (Frobbensis) [?]-11-$

Nicolaus a Kinschot Delphensis Batavus-11-$

Theodorus a Melissant Roterodamus Belga-11-$

Arnoldus Cornelii Outshooren alias Vlaminck Amsterodamensis-11-+

Tielmannus a Muylwyck Delfensis-11-$

Augustinus Stalpert van der Wielen Hagensis-11-=

Jacobus de Witte Amsterodamensis Hollandus-11-+

Petrus a Mewen Durdrechtano-Batavus-11-$

Johannes de Bergaigne Harlemensis-11-$

Theodorus a Berkenrode Hollandus Harlemensis-11-$

Rolandus de Pottre Hagiensis Hollandus-11-=

Joannes Wevelichovius Hollandus-11-$

Cornelius ab Heteren Vyanensis-11-$

Simon Rychius Amstelo-Batavus-11-+

Cornelius Boelius Hoolesloot Amstelredamus-11-+

Geerardus Berckius Dordracenus-11-$

Elandus van Santen Schiedammus Batavus-11-$

Theodorus ex Hagus (*ou* a Ruiven) Delffensis-11-$

Melchior Bouwer Amsterdamensis, J.U.D.-11-+

Stephanus van der Werve Haganus Batavus-11-=

Johannes a Noordinghen Haganus-11-=

Gerardus de Jong Assendelphus-11-&

Adelbertus van Hoven Harlemensis-11-$

Gisbertus Dommer (Dimmer) Hagiensis-11-=

Cornelius van der Nes Delphensis-11-$

Arnoldus van der Myle Hagiensis Batavus-11-=

Anselmus van der Dussen Batavo-Delphius-11-$

Henricus Jacobi Rosa Roterodamo-Batavus-11-$

Lancilotus a Brederode Batavus-11-$

Everardus Thomæ Puttershouckius Goudanus Batavus-11-$

Heymannus van der Myle Batavus-11-$

Sibrandus ab Alckemaede Harlemo-Batavus-11-$

Henricus Duyst van Voerhout Hollandus-11-$

Joannes Doublet Batavus-11-$

Joannes Forestius Batavus, J.U.D.-11-&

Nicolaus Carbasius Joannis filius Hornanus-11-&

David a Wassenberch Harlemo-Batavus, J.U.D.-11-$

Joannes Swaendalius Hollandus [?]-11-$

Ysbrandt Gerritzoon Bleyswyck uyten Haech-11-=

Guillaume de Castricum Hollandus-11-$

Johannes Ooms a Wyngaerden Leidensis Batavus-11-$

Theodorus Ramp Herlemo-Batavus-11-$

Pieter Tiallis van Enchuysen-11-&

Wilhelmus Johannis Tromp Goudanus Hollandus-11-$

Paulus van der Laen nobilis Belga Oostvoornanus-11-$

Conradus Ruys a Lanckfort Dordracenus-11-$

Jacobus Hamel Hagæ-comitanus-11-=

Michael a Crayesteyn Dordracenus-11-$

Adrianus Muller Amstelo-Batavus-11-+

Jacobus Snoeck [?]-11-$

Cornelius a Beresteyn Delpho-Batavus-11-$

Cornelius Croock Amstelo-Batavus-11-+

Antonius de Wael Harlemo-Batavus-11-$

Cornelius Dimmer Hagiensis-11-=

Albertus Franciscus Rypa Noorthollandus-11-&

Isebrandus a Swaenswyck Lugduno-Batavus-11-$

Theodorus Frederici Beuckel Goudanus-11-$

Adrianus Frederici Beuckel Goudanus-11-$

Guilielmus Joannis ab Arlanderveen-11-$

Joannes de Voocht Hagiensis-11-=

Joannes Meursius Hollandus, D.U.J.-11-$

Wilhelmus a Sonnevelt Alckmarianus-11-&

Corneille de Mourquerque van Delft-11-$

Jaricus van der Bourcht Hagiensis-11-=

Johannes Zurenus van Beresteyn Harlemo-Batavus-11-$

Paulus van Beresteyn Harlemo-Batavus-11-$

Jacobus Corenius Alcmarianus Hollandus-11-&

Hieronymus de Backere Durdrechto-Batavus-11-$

Gilbertus a Wynbergen Schoonhovianus Batavus-11-$

Antonius Repelaer Dordracenus-11-$

Bartolus van der Meer van Berendrecht Hollandus Hagiensis-11-=

Franco van der Meer van Berendrecht Hagiensis-11-=

Cornelius Spronc natione Hollandus [?]-11-$

Harmannus Coetius natione Hollandus [?]-11-$

Jacobus Muer Hollandus Enchusanus-11-&

Jacobus de Witt Durdrechto-Batavus-11-$

Arnoldus van Couwenhove Brielanus-11-$

Cornelius Hogendorp Roterodamensis Batavus-11-$

Andreas Petry Suyderhueve Haerlemensis Batavus-11-$

Johannes a Bekesteyn Harlemensis Batavus-11-$

Balduinus a Bekesteyn Harlemensis Batavus-11-$

Egbertus Ramp Harlemensis Batavus-11-$

Joannes van Andel Besoius-11-$

Guylielmus a Muylwyck Roterodamo-Batavus-11-$

Petrus Walenburch Roterodamus-11-$

Cornelius Crimpen Roterodamus-11-$

Adrianus Cosmus a Staeckenbroeck Reynsaterwoudanus Batavus-11-$

Johannes de Veer Amstelredamensis-11-+

Petrus van der Graeff Delphensis Batavus-11-$

Georgius a Thienen Battavus [?]-11-$

Johannes Kemp Gorcomiano-Battavus-11-$

Gerardus Dudyn Gorcumensis-11-$

Gisbertus a Vlooswyk Amsterodamensis Batavus-11-+

Heymericus de Roomer Worcomiensis Batavus-11-$

Henrick Willemsoon Vos van der Goude-11-$

Jan Bolnes van der Goude-11-$

-11-Pays-Bas : Hollande

Hollande-Septentrionale-Westfrise-11-&

Amsterdam-11-+

Amsterdam-Compagnie néerlandaise des Indes orientales (VOC)-11-++

La Haye-11-=

Hollande-Méridionale-11-$

1611-1620

Barthout van Abbesteech van der Goude-11-$

Christianus a Slingelant Gorcomo-Batavus-11-$

Gulielmus Bischop Roterodamo-Batavus-11-$

Adrianus Joannis ab Assendelft Hagæ-comitanus-11-=

Martinus Douu Lugduno-Batavus-11-$

Abrahamus Balckius Amstelo-Batavus-11-+

Jacobus de Wit Hagensis-11-=

Guilielmus Bontius, J.U.D., Lugduno-Batavus-11-$

Christianus Prins Roterodamus-11-$

Petrus C..… (Clerck) Amsterdamensis [*nom raturé*] (hic ob causas inter infamos relatus)-11-+

Jacobus a Schoordyck Hollandus, dominus in Reinauwen-11-$

Gulielmus Conradi Willckes Hagiensis-11-=

Cornelius Blasyck Harlemo-Hollandus-11-$

Albertus Verhooch Harlemo-Hollandus-11-$

Petrus de Witte Hagiensis-11-=

Fridericus Riccius Enckusanus-11-&

Nicolaus Goutswaert Goudanus-11-$

Janus Rutgersius gente Batavus, domo Dordrechtanus-11-$

Cornelius Hermannus a Sammer Harlemensis Hollandus-11-$

Adrianus Nieulant Schiedamus-11-$

Gulielmus Musius Schiedamo-Batavus-11-$

Johannes Huigius S f[ilius] Hornanus-11-&

Casparus a Kinschot Hagiensis-11-=

Cornelius W. f[ilius] van Beveren Dordracanus-11-$

Gualterus van Clootwyck Gartrudismontanus. Obiit 15 junii anno 1612-11-$

Gerardus ab Oestrum Woerdanus-11-$

Gisbertus Beranus Wesopio-Batavus (judicatus est et inter infames)-11-+

Wilhelm van der Burch Delff Hollandus-11-$

Cornelius Dobbius Amsterodamensis-11-+

Carolus a Beveren Dordracensis-11-$

Tielmannus Wyntgis Delphensis-11-$

Theodorus Sixtius Hagæ-Batavus-11-=

Nicolaus a Born Dordraco-Batavus-11-$

Jacobus Patius Leidensis-11-$

Warnerius Sysmus Brifoliensis [?]-11-$

Philippus Cromstryen Hagæcomitis Hollandus-11-=

Jacobus Corn. Hooft Amstelodamensis-11-+

Jacobus Hooft Amsteledamensis-11-+

Gwilhelmus a Dam Amsterdamensis-11-+

Georgius Nicolai van der Laen Hollandus Harlemensis-11-$

Bruno Walenburch Roterodamo-Batavus-11-$

Adrianus Groenhout Delpho-Batavus-11-$

Jacobus Gerardi de Vrye Hornanus-11-&

Jacobus Guilielmi Hooft Amsteldamo-Batavus-11-+

Ghysbertus a Duvenvoorden de Monte Sanctae Ge[r]trudis (Geertruidenberg)-11-$

Bartholomæus a Sammer Hollandus Alcmaria-11-&

Jacobus de Duvenvoirde de Warmont Hollandus Leida-11-$

Arnoldus Altena Belga-11-$

Alexander Craeck Belga Haga oriundus-11-=

Guilielmus Recholt Belga [?]-11-$

Jacobus Kettingh Belga [?]-11-=

Simon Langius Schoonhovia Batavus-11-$

Petrus Sautinnos-11-+

Cornelius van Dronckelaer Amstelo-Batavus-11-+

Jacobus C.nn…. P …..erdanus (*lecture difficile*) Hollandus-11-$

Gerardus Storm Amsterodamensis-11-+

Florentius Schoonhovius Batavus Gouda oriundus-11-$

Harmannus Cincq Batavus Gouda oriundus-11-$

Johannes Ripperts Hornanus Belga-11-&

Johannes Nicolai van der Laen Hornanus-11-&

Petrus Boelens Amstelo-Batavus-11-+

Guillielmus Bardesius Northollando-Batavus-11-&

Regnerus Pauu Amstelodamensis Hollandus-11-+

Daniel de Raet Hollandus-11-$

Cornelius a Santhorst prope Hagam-comitis-11-=

Theodorus van der Dussen Delffo-Batavus-11-$

Wilhelmus de Veen Alcmaria-Batavus-11-&

Johannes Polyander Durdrechto-Batavus-11-$

Walterus Groeneweghen Delphensis-11-$

Theodorus de Cocqh Hagiensis-11-=

Bertholdus Ingelius Amstelodamensis-11-+

Joannes R. Ingelius Amstelo-Batavus-11-+

Antonius Tesmans Hagiensis-11-=

Quintinus de Veer Amstelodamo-Batavus-11-+

Bucoldus Santenus Hagiensis-11-=

Simon Venius Hagæ-comitanus-11-=

Gerardus Cinq Goudano-Batavus-11-$

Theodorus Brunonis Hornano-Batavus-11-&

Levinus Rivet Rotterodamensis-11-$-11-$

Georgius Cuyck Heusdanus-11-$

Godefridus de Haestrecht Belga Drunensis-11-$

Theodorus a Beresteyn Batavo-Belga Delphensis-11-$

Constantinus a Lyre Hagæ-comitanus Hollandus-11-=

Jacobus Reael Amstelodamensis-11-+

Arnoldus Kievit Roterodami-Batavus-11-$

Theodorus de Bie Hagiensis Hollandus-11-=

Abrahamus de Bye Hagensis Hollandus-11-=

Arnoldus Vinnen Hagensis Hollandus-11-=

Theodorus van Duynen Hagiensis Hollandus-11-=

Daniel Colterman Harlemensis Hollandus-11-$

Bartholomæus Visch Rotterodamo-Batavus-11-$

Joannes Sloosius Goudano-Batavus-11-$

Adrianus van der Loo Dordrechto-Batavus-11-$

Simon Slingelant Dordracenus-11-$

Joannes Antonii Peckius Delfensis Hollandus-11-$

Cornelius van der Laen Haerlemo-Batavus-11-$

Nicolaus van der Laen Haerlemo-Batavus-11-$

Johannes Blanckaert Huesdano-Batavus-11-$

Florentius van Herlaer Hueva-Batavus-11-&

Cornelius Mus Rotterodamo-Batavus-11-$

Albertus van der Burch Amstelredamensis Batavus-11-+

Petrus Pauw Amstelrodamensis Batavus-11-+

Pieter van Roon van Hollant van Roon-11-$

Stephanus Blanckart Heusdanus (Heusden)-11-$

Johannes Goubarts A…… (*lecture difficile*) [?]-11-$

Cornelius a Beveren P. f[ilius] Dordracenus-11-$

Isaac Michgielsen Bogaert van Delff wt Hollant-11-$

Theodorus Pruys Amstelo-Batavus-11-+

Gerardus Schaap Amstelo-Batavus-11-+

Cornelius Witsius Amsteldamensis-11-+

Martinus Cornelii van Santen-11-$

Theodorus Gommersen (Jommetsen) [?]-11-$

Jacobus van der Blocq Delpho-Batavus-11-$

Petrus Boelen Hagiensis [Batavus]-11-=

Guilielmus Backer Amstelodamensis-11-+

Leonardus Leonardi Amsteldamensis-11-+

Allardus de Groot Hornano-Hollandus-11-&

Johannes Neck Hornanus Hollandus-11-&

Cornelius Neck Hornanus Hollandus-11-&

Isbrandus van der Wyck Schiedamensis Hollandus-11-$

Petrus Bezemer Goudano-Batavus-11-$

Johannes Broers (*lecture difficile*) Amstelo-Batavus-11-+

Wilhelmus Paedts Lugduno-Batavus-11-$

Albertus Hogeveen Lugduno-Batavus-11-$

Adrianus Langius Schoonhovia-Batavus-11-$

Martinus Sonck Amsteldamensis Batavus-11-+

Arnout Willems van Hoobroeck van Heusden van Hoolant-11-$

Paulus van Peenen Amstelodamensis-11-+

Joannes Gansius Brilano-Batavus-11-$

Petrus de By Leidensis-11-$

Zacchæus de Jeger Hollando-Alcmarianus-11-&

Ernestus Noyen Amstelodamensis-11-+

Sebastianus Franco Durdrechto-Batavus-11-$

Jacobus a Berkel Haga-comitanus-11-=

Johannes Voercknecht Amstelo-Batavus-11-+

Nicolaus Abbenbrouck Hollandus Brielensis-11-$

Johannes Venius (*lecture difficile*) Hagæ-comitanus-11-=

R. Valckensteyn (Rochus Greiph a Valckensteyn) Hollandus-11-$

Gisbertus van Zell Amstelo-Batavus. *Décédé le 29 septembre 1619*-11-+

Martinus van Zell Amsteredamensis-11-+

Joannes Ververius Haerlemo-Batavus-11-$

Theodorus Rosendalus Batavus [?]-11-$

Johannes Laignier Harlemo-Batavus-11-$

Petrus van der Horst Rotero-Batavus-11-$

Justus Boelius Amstelo-Batavus-11-+

Joannes Scheepel Amstelo-Batavus-11-+

Matthyas Boelii Amstelo-Batavus-11-+

Johannes Spiers Amstelo-Batavus-11-+

Petrus Stenberch Harlemo-Batavus-11-$

Theodorus Leeuwius Hagiensis-11-=

Adriaen Cornellie van Amsterdam-11-+

Abrahamus Mathei Onderwater Deffenische (Dordrecht ?)-11-$

Jacobus Snell Hagiensis-11-=

Nicolaus van Rhyn Hagiensis-11-=

Ghysbertus Melchior Appelman Amsterdamensis-11-+

Johannes ab Arkell Gorcomiensis-11-$

Theobaldus Graswinckel Delpho-Batavus-11-$

Petrus D. Wit Amstelo-Batavus-11-+

Albertus Canterus Hagæ-comitanus-11-=

Cornelius Alewyn Dordracensis-11-$

Ysbrandus Arnoldi Craft Wormerio-Batavus-11-&

Johannes Olferdi Horna-Batavus-11-&

Joannes de Cocq Hagensis Batavus-11-=

Johannes a Bosvelt Harlemo-Batavus-11-$

Gysbertus Hopcooper Gouda-Batavus-11-$

Nicolaus a Bronchorst Amstelo-Batavus-11-+

Cornelius de Graef Alcmarianus Batavus-11-&

Theodorus Sassenius Medenblica-Batavus-11-&

Christianus de Cupre Lugduno-Batavus-11-$

Benedictus Ingelius Amstelodamensis-11-+

Ghysbertus Heeremans Amstelredammensis-11-+

Silvester Heeremans Amstelredamensis-11-+

Jacobus Laignier Harlemensis Hollandus-11-$

Guilielmus van der Hulff Harlemensis-11-$

Hugo Gvisch Roterodamensis-11-$

Jacobus Buyck Amsteledamensis, dioecesis Harlemensis-11-+

-11-Pays-Bas : Hollande

Hollande-Septentrionale-Westfrise-11-&

Amsterdam-11-+

Amsterdam-Compagnie néerlandaise des Indes orientales (VOC)-11-++

La Haye-11-=

Hollande-Méridionale-11-$

1621-1630

Rudolphus Donati Akerboom Amsteldamus-11-+

Fredericus Pollio Verhorst Hagæ-comitanus-11-=

Joannes Henrici Pater Nardenus-11-+

Franciscus Cromstryen Hagæ-comitanus-11-=

Guilielmus Ruytenburg Amstredamensis-11-+

Theodorus Baen Enchusa-Batavus-11-&

Cornelius Ronses Monichedamensis-11-&

Jacobus Bam Leodiensis (*ou* Leidensis)-11-$

Gerbrandus Nicolai Buyck Hornanus-11-&

Petrus Wilhelmi Crap Hornanus-11-&

Petrus Panhusius Hagæ-comitanus-11-=

Johannes van der Chys Delpho-Battavus-11-$

Jacobus Olferdi de Jongh Horna-Batavus-11-&

Jacobus Vitellius (Calf) Alcmaria-Batavus-11-&

Jacobus van Zell Amsterdamensis-11-+

Cornelius Sonnevelt ab Osthorne Alckmaria-Batavus-11-&

Henricus Hooft [Amstelrodamensis]-11-+

Ludovicus Couckelbergius [Hagiensis]-11-=

Fredericus de Lyere Hagæ-comitanus-11-=

Theodorus a Nuyssenborch Harlemensis-11-$

Ulricus a Groenscheid Wourda-Batavus, phil. et med. doctor-11-$

Augustinus a Teylingen Batavus-11-&

Jacobus Florentii a Teylingen Alcmariensis Hollandus-11-&

Reinier van Oldenbarnevelt-11-$

Petrus van den Dam Batavus [?]-11-$

Wilhelmus ab Oldenbarnevelt Roterodamo-Batavus-11-$

Troilus van Damme Hagensis-11-=

Clement Berkel Hagiensis-11-=

Cornelius Baccart Hollandus Hagæ-comitanus-11-=

Andreas du Fresne Haga-Batavus-11-=

Gerardus Schaep P. f[ilius] Amstelo-Battavus-11-+

Joannes Nobelaer Hagæ-Batavus-11-=

Theodorus van Flory Hagæ-Batavus-11-=

Henricus Tesmans Haga-Batavus-11-=

Tilmannus a Beaumont Dordrechto-Batavus-11-$

Johannes Hasselaer Amstelrodamensis Batavus-11-+

Jacobus van der Burgh Lugduno-Batavus-11-$

Nicolaus a Lodensteyn Renoburgensis Batavus-11-$

Henricus a Twenhuysen Amstelredamensis-11-+

Paulus Boulemus Hagiensis-11-=

Johannes ab Heemskercke Amstelo-Batavus-11-+

Jacobus a Montfort Lugduno-Batavus-11-$

Guilhelmus Loder Amstelo-Batavus-11-+

Guillaume van der Chys Delpho-Batavus alias Jacobus de Meerstraten-11-$

Cornelius Bam Hagæ-comitanus-11-=

Petrus Proost Enchusa-Batavus-11-&

Fredericus Kraleson (Maleson) Enchusa-Batavus-11-&

Gerardus Reynst Amstelo-Batavus-11-+

Lambertus d’Overschie Delpho-Batavus-11-$

Fredericus de Vries Amstel-Batavus-11-+

Adrianus Hogerbets Hagiensis-11-=

Joannes Arnoldus Corvinus Lugduno-Batavus-11-$

Jan Harcksoon Schagen d’Alcmaar-11-&

Guilhelmus Herculis Schagen Alcmaria-Batavus-11-&

Lazarus a Zonst Lerdamo-Batavus-11-$

Cornelius Boom Amstelo-Batavus-11-+

Albartus Bas Amstelo-Batavus-11-+

Adrianus van der Houck Stryensis-Battavus-11-$

Daniel Nobelaer Haga-comitanus-11-=

Joan van der Burch van Leyden-11-$

Franciscus Roscam Huesdanus-11-$

Georgius Ratallerus Doublet Hagæ-comitanus-11-=

Nicolaus Del de Jonge van Weesop in Hollant-11-+

Theodorus a Steenhuyssen Amstelo-Batavus-11-+

Heindric de Heule Delphensis-11-$

Cornelius Benninghius Amstelo-Batavus-11-+

Cornelius Snellinck Amstelodamensis-11-+

Henricus Croock Amsteledamensis-11-+

Joannes a Biesten (Bieffen) Amsteledamensis-11-+

Burchardus Francisci Gaeft Amsteledamensis-11-+

Cornelius a Casteren Durdrechto-Batavus-11-$

Elias Trip Dordracenus-11-$

Simon Paludanus (van den Brucke) Harlemensis-11-$

Joannes Hoocheland Horna-Batavus-11-&

Nicolaus van der Merct Amsterdammensis-11-+

Godefridus d’Overschie Delphensis-11-$

Jacobus Surmoniss Roterdamo-Batavus-11-$

Theodorus van Ring Delphensis Batavus-11-$

Johannes Rombouts Amstelodamo-Batavus-11-+

Cornelius van Cuyck Huesdanus Batavus-11-$

Jacob Rombouts van Amsterdam-11-+

Willem Jonck-heyn van Amsterdam-11-+

Bartholomeus Wouwius Hagæ-comitanus-11-=

Theodorus Forestus Hollandus-11-&

Cornelius Tresel Hollandus-11-=

Theodorus Graswinckel Delphensis-11-$

Franco van der Meer Hagiensis-11-=

Jacobus Dedel Hagiensis-11-=

J. v[an] Liesvelt Hagiensis-11-=

Joannes van Wassenberch Harlemo-Batavus-11-$

Cornelius van Stryen Haga-Batavus-11-=

Martinus Calschiner Amstelrodamensis-11-+

Abrahamus van Beveren Durdrechto-Batavus-11-$

Janus ab Eusum Nortvico-Batavus-11-$

Joannes van Teylingen Haga-comitanus-11-=

Nicolaus van Teylingen Haga-comitanus-11-=

Cornelius de Vlaming ab Outshoorn Amstelo-Batavus-11-+

Johannes Ruis (Ruce) Amstelo-Batavus-11-+

Theodorus Pelt Rotterodamus-11-$

Cornelius a Veen Hagiensis-11-=

Gulelmus Vondelius Amsteldamensis-11-+

Gerardus Montanus (a Bergh) natione Hollandus Amsteldamensis-11-+

Georgius de Velden Delphensis-11-$

Joannes a Volbergen Hollando-Hagiensis-11-=

Joannes ab Halewyn Harlemo-Batavus-11-$

Johannes de Jonge Hagæ-comitanus-11-=

Alart van Ryn Harlemensis-11-$

Bartholomæus Paauw Lugduno-Batavus-11-$

Michael Eems Hagæcomitano-Batavus-11-=

Cornelius Pynacker J.U.D., legatus extraordinarius-11-=

Henricus Both van der Eem Haga-Batavus-11-=

Johan[n]es d’Overschie Delphensis-11-$

Antonius van der Werff Brila-Batavus-11-$

Guilielmus Nooms Hollando-Batavus-11-+

Cornelius de Graeff Batavo-Hollandus-11-+

Theodorus de Graeff-11-+

Cornelius van der Loo Dordrechtanus-11-$

Theodorus van der Burch Durdrechtanus-11-$

Henricus van Nispen Durdrechtanus-11-$

Adrianus a Vryburch Batavus-11-&

Bartholomæus Pots Hagæ-comitanus-11-=

Ægidius de Gerbode Brielanus-11-$

Wilhelmus Bogaert Amstelodamo-Batavus-11-+

Jacobus Briel Delphensis-11-$

Gosuin de Raesfelt Haga-comitanus-11-=

Quirinus Christiani a Borsele Delffensis-11-$

Wolpherdus a Blyenburch Hagæ-comitatensis-11-=

Volcqardus de Jong Enchusanus-11-&

Petrus Cheeuwen Haghacomitanus-11-=

Jacobus a Teylingen Alcmarianus-11-&

Joannes Berck eques auratus in supremo consilio in Hollandia senator-11-$

Jacobus de Roovre Dordrechto-Batavus-11-$

Gerardus Marcellus Ververius Durdrechto-Batavus-11-$

Johannes van der Houck Batavus-11-$

Wilhelmus ten Grootenhuys Hollando-Batavus-11-+

Andreas Elantius Hagiensis-11-=

Theodorus den Otter Amstelodamus-11-+

Thomas a Sammer Alcmaria-Batavus-11-&

Joannes Albertus Bannius Harlemensis-11-$

Justus Buyck Lugduno-Batavus-11-$

Dirick Buys (Suys) van Delf geboren-11-$

Salomon de La Voye Amstelodamensis-11-+

Nicolauus Corneli Coldenhooven Amsterdamensis-11-+

Cornelius Schilperoort Lugduno-Batavus-11-$

Dorotheus van der Bourch Hagæcomitanus-11-=

Matthæus Heereman Amstelodamensis Hollandus-11-+

Franciscus a Born Haga-Batavus-11-=

Guillielmus van den Kerckhove Haga-Batavus-11-=

Johannes Walen Dordrechto-Batavus-11-$

Adrianus a Dorp Harlemo-Batavus-11-$

Symon Hases Horna-Batavus-11-&

Suffridus Heynssen Enchusanus Hollandus-11-&

Albertus Niropius Alcmaria-Noorthollandus-11-&

Cornelius Adriani a Lybaert Hagiensis-11-=

Leonardus a Luchtenburch Hagiensis-11-=

Gerardus a Davelaer Amstelrodamo-Batavus-11-+

Alardus van Diemen Amstelo-Batavus-11-+

Blasius Oem Dordracenus Batavus-11-$

Antonius Oem Dordraco-Batavus-11-$

Adrianus a Vredenburch Roterodamo-Batavus-11-$

Daniel Hogendorp Roterodamo-Batavus-11-$

Leonardus Hogendorp Roterodamo-Batavus-11-$

Nicolaus Boogaert Delphensis Batavus-11-$

Cornelius Stapelius Stenbergo-Brabantus (Steenbergen)-11-$

Gideon Colterman Harlemo-Batavus-11-$

Cornelius Witsius Amstelo-Batavus-11-+

Florentius de Jager Goudanus Battavus-11-$

Joannes Oem Dordrechto-Batavus-11-$

Martinus Oem Dordraco-Batavus-11-$

Daniel Oem Dordraco-Battavus-11-$

Meynardus Allardi Semeyns-11-&

Martinus van der Ghoes Haga-comitanus-11-=

Rudolphus Bicker Amsteldamensis-11-+

Jacobus Heereman Amstelredamensis-11-+

Cornelius Heereman Amsterdamensis-11-+

Hieronymus Cools Hornanus Hollandus-11-&

Petrus Barcman Amstelo-Batavus-11-+

Nicolaus Blyenberch Amstelo-Batavus-11-+

Nicolaus Bas Amstelodamensis-11-+

Petrus Andreas Coddæus Amstelodamensis Battavus-11-+

Gulielmus ab Elbinck Amstelodamo-Batavus-11-+

Georgius Erckel Schiedamensis-11-$

Wilhelm van Loon Amstelredamensis-11-+

Jacobus Venius Alckmariensis-11-&

Maerten van Loon Amsterdamensis-11-+

Ludovicus d’Altren Hollandus Amsterdamensis-11-+

Hugo Boxel Gorcomio-Batavus-11-$

Heinricus a Goch Rotterodamo-Battavus-11-$

Franciscus van den Brouck Heusdanus Batavus-11-$

Adrianus van der My Lugduno-Batavus-11-$

Johan Geul Hagiensi-Batavus-11-=

Joannes Stangerus Amsterdamensis-11-+

Cornelius a Ravesteyn Hagiensis-11-=

Wisselius Peckius Delphensis Hollandus-11-$

Martinus de Volbergen Hagæcomitanus Hollandus-11-=

Henricus van der Burch Delfo-Batavus-11-$

Georgius Georgii Backer Amsteldamo-Batavus-11-+

Wilhelmus Backer Amstelodamo-Batavus-11-+

Adrianus a Stryen Haga-Batavus-11-=

-11-Pays-Bas : Hollande

Hollande-Septentrionale-Westfrise-11-&

Amsterdam-11-+

Amsterdam-Compagnie néerlandaise des Indes orientales (VOC)-11-++

La Haye-11-=

Hollande-Méridionale-11-$

1631-1640

Adrianus de Raet Amstelodamo-Batavus-11-+

Guilielmus Donckerus Goudano-Batavus-11-$

Joannes Maetsuycker Amstelo-Batavus-11-+

Johannes van der Meer Lugduno-Batavus-11-$

Andreas Hesselt de Dinter Hagiensis-11-=

Adrianus Pots Haghæ-Batavus-11-=

Balthasar a Kessel Hollandus ex civitate Alcmariensi-11-&

Symon van Heyningen Lugduno-Batavus-11-$

Guilielmus Theodori Coppier Amstelredamensis-11-+

Joannes Boot Haga-comitis Batavus, J.U.L.-11-=

Gysbertus van Diemen Amstelo-Batavus, J.U.D.-11-+

Abrahamus Oyens Amstelodamensis, J.U.L.-11-+

Gedeon van der Putten Langeracenus, J.U.L.-11-$

Theodorus Schout Harlemo-Batavus-11-$

Garbrandus Teyng Haerlemo-Batavus, J.U.D.-11-$

Cornelius Rippersz Horna-Batavus-11-&

Nicolaus van der Graeff Delpho-Batavus, J.U.L.-11-$

Isaac van Thye Hagæ-comitanus, J.U.L.-11-=

Joannes Blyenberch Amstelo-Batavus-11-+

Fredricus ab Herlaer Alcmarianus-11-&

Hermannus Bolck Enchusanus-11-&

Wilhelmus van der Does Amstelo-Batavus-11-+

Petrus van den Hout Huesdanus-11-$

Petrus Codde Amsterdamensis-11-+

Petrus Pauw Amsterdamensis-11-+

Abrahamus Beaumont Dordracenus-11-$

Henricus van der Veecken Haga-comitanus Hollandus-11-=

Joannes van der Veecken Hagæ-comitanus-11-=

Johan a Corput Dordracenus-11-$

Ægidius van Heussen Lugduno-Batavus-11-$

Jacobus Baack Amstelodamensis-11-+

Cornelius Gallis Haga-Batavus-11-=

Nicolaus Neck Horna-Batavus-11-&

Isaacus Moll Vianensis ad Leccam-11-$

Florentius Cant Gouda-Batavus-11-$

Joannes Ernesti a Bassen Amstelo-Batavus-11-+

Joannes Soutman Haerlemensis-11-$

Joachimus a Myerop Batavus Hagiensis-11-=

Cornelius Tas Lugd[un]o-Batavus-11-$

Joannes Cools Horna-Batavus-11-&

Theodorus Andreæ a Swaanswyck Gouda-Batavus-11-$

Mathias Schage Medenblico-Hollandus-11-&

Theodorus Forestus Horna-Batavus-11-&

Petrus J. Trom Edamensis-11-&

Petrus Overtwater Hornanus-11-&

Balthasarus Jacott ab Axele Alcmariensis-11-&

Theodorus Kievit Gouda-Batavus-11-$

Gualtherus de Raet Amstelo-Batavus-11-+

Johan Rysbergen Hagiensis-11-=

Jacobus ab Adrichem Delfensis-11-$

Petrus Paauw Amstelo-Batavus-11-+

Laurentius de Geer Dordraco-Hollandus-11-$

Cornelius ab Heemskerck Harlemensis-11-$

Gerardus de Harde Amstel-Batavus-11-+

Matthæus Slade Amstelo-Batavus-11-+

Petrus Ernesti a Bassen Amstelo-Batavus-11-+

Lourentius Baeck Amstelo-Batavus-11-+

Cornelius van Borselaer Delphensis-11-$

Floris van Kuyll Gorchomo-Batavus-11-$

Jacobus de Bye Rysvico-Batavus-11-$

Quirinus van der Maes Hagecomitanus-11-=

Michael Pompæus Dordracænus-11-$

Petrus Bogaert Amstelrodamo-Batavus-11-+

Vincentius van der Menn Amstelodamo-Batavus-11-+

Joannes Roetertius Amstelo-Batavus-11-+

Henricus van Gouthouven Dordraceno-Batavus-11-$

Gisbertus de With Dordrecto-Batavus-11-$

Gerardus Beelaerts Heusdano-Battavus-11-$

Gerardus d’Alteren Amsterdamensis-11-+

Petrus de Leonardis Amstelo-Batavus-11-+

Gerardus Coppit Amstelo-Batavus-11-+

Nicolaus Boelisse Horna-Batavus-11-&

Carolus Willigsch Delfensis-11-$

Jean Casembroot Hagæ-comitis Hollandus-11-=

Simon Jacobi Graswinckel Hollandus Delphensis-11-$

Theodorus a Coolwyck Delphensis-11-$

Cornelius de Jonge Hagæcomitanus-11-=

Cornelius Soetens Hagæcomitanus-11-=

Hermannus van Wolde Dordraco-Batavus-11-$

Jacobus Pilius Dordrechto-Batavus-11-$

Adrianus Basson Goudano-Batavus-11-$

Guilielmus de Groenhout Vyanensis-11-$

Hubertus van der Meer Rotterodamo-Batavus-11-$

Johannes Carlier Coloniensis [?] (Amsterdam)-11-+

Guilielmus Dimmer Hollandus Hagensis -11-=

Cornelius van Putten Hollandus Hagensis-11-=

Hieronymus de Beverningk Gouda-Batavus-11-$

Hugo Meerman Delphis Batavus-11-$

Jacobus Rosa Roterodamo-Batavus-11-$

Justus a Sorgen Hagiensis-11-=

Joannes Bos Amstelo-Batavus-11-+

Sebastianus Ypelaer Heusdensis Hollandus-11-$

Allardus Sirmenhusius Amstelo-Batavus-11-+

Jacobus de Hertoge Heusdensis-11-$

Bartholomæus van de Glyndt Willemstada-Brabantus-11-$

Johannes van der Wolde Dordrechto-Batavus-11-$

Simon a Praet Veteraquinus-Batavus-11-$

Everardus Bick Gaudano-Batavus-11-$

Jacobus van Beveren Dordrechto-Batavus-11-$

Johannes Dvinglo Vlardinga sita in agro Delphensi Batavus-11-$

Cornelius Hartichvelt Rotterodamensis Batavus-11-$

Cornelius Olfertz Horna-Batavus-11-&

Johannes Walbeeck Lugduno-Batavus-11-$

Huibertus de Haes Lugduno-Batavus-11-$

Augustinus Hamel Haga-Batavus -11-=

Arnoldus van der Graeff Delfo-Batavus-11-$

Wilhelmus van de Werve Haga-Batavus-11-=

Guilhelmus a Lyera, toparcha Oostervici, legatus ordinarius-11-=-11-$

Petrus Bortius Hagiensis-11-=

Thomas van Cassiopyn uut Brabant-11-$

Johannes Barlaer Haga-Batavus-11-=

Roetertius Ernesti Amstelo-Batavus-11-+

Henricus Hooft Amstelo-Batavus-11-+

Petrus Grotius Rotterodamo-Batavus-11-$

Godofredus Wuytiers Amstredamensis-11-+

Henricus Hem Amstelrodamo-Batavus-11-+

Johannes van den Honert Haga-comitatus -11-=

Johannes van Dans Amstelo-Batavus-11-+

Gerardus Pool Amstelo-Batavus-11-+

Michael Praes de Witte Amstelodamus-11-+

Fredericus Dorpius Hagæ-Batavus-11-=

Joannes Koetenburgh Alcmera-Batavus-11-&

Adrianus van Breedehoff Dordrechto-Batavus-11-$

Petrus a Vlooswyck Amsterdammensis-11-+

Joannes Corham Rotterdammensis Batavus-11-$

Petrus Vogelesang Amsterdamensis-11-+

Philippus a Leefdael Meeuwensis-11-$

Joannes van Loon Amstelo-Batavus-11-+

Guillemmus Fabry Harlema-Batavus. *Décédé le 24 novembre 1638*-11-$

Cornelius de Heyde, Delphis-Batavus-11-$

Cornelius a Wyngarden Batavus [?]-11-$

Jacobus Hinlopen Amstelo-Hollandus-11-+

Gulielmus Jacson Gorcomio-Batavus-11-$

Cornelius ab Aerssen Hollandus (*nom raturé*)-11-$

Johan Bom Dordrechto-Batavus-11-$

Johan Gey Dordrechto-Batavus-11-$

Jacobus van der Does Haga-comitanus Batavus-11-=

Adrianus Forestus Horna-Batavus-11-&

Adrianus van der Mast Dordrechto-Batavus-11-$

Martinus Abrahami Hoogenhouck Delphis-Batavus-11-$

Martinus van Davelaer Amstelo-Batavus-11-+

Theodorus van der Laen Brilanus-11-$

Elias Ardes Hagensis-11-=

Beuckel van Santen van Delft-11-$

Henricus a Losecaat Heuclomio-Batavus [?]-11-$

Jacob Maire van Amsterdam-11-+

Guilielmus a Lyera Hollandus-11-$

Arnoldus Corvinus Lugduno-Batavus-11-$

Henricus Dousa Gorcomio-Batavus-11-$

Wilhelmus Episcopius Rotterdamo-Batavus-11-$

Salomon van Schoonhoven Amstelo-Batavus-11-+

Henricus Hovius Hagiensis Batavus-11-=

Abraham Ardes Hagiensis-11-=

Gerardus Uyterdyc Enchusanus-11-&

Anthonius Neercassel Gorcomio-Batavus-11-$

Anthonius van Wevelinchoven Gorcomio-Batavus-11-$

Mathieu de Clootwyk Gertrudt-Batavus-11-$

Simon van de Haven Roterodamo-Batavus-11-$

Rodolphus Snellius a Royen Hagæ-comitanus-11-=

Henricus Fagel Hollandus-11-=

Franciscus Fagel Hagæ-comitanus-11-=

Henricus Leonius Edamo-Batavus-11-&

Henricus Caspari Tarquinius Amstelo-Batavus-11-+

Daniel Hochepied Amstelo-Batavus-11-+

Matthæus Steyn Haerlemo-Batavus-11-$

Gualtherus Rubyn van Zoelen Amsterodamensis-11-+

Petrus Vlaswat Amstelo-Batavus-11-+

M[atthæus] Spranger Amstelo-Batavus-11-+

Arnoldus Bartolotti ab Heuvel Amstelo-Batavus-11-+

Samuel Latius Lugduno-Batavus-11-$

Jacobus Stas Haga-comitanus-11-=

Johan van der Burch Dordraceno-Batavus-11-$

Conradus Masius Hagiensis-11-=

Onias Geldorpius Amstelo-Batavus-11-+

Henricus Thierens Delphensis-11-$

Jacobus Smoutius Haga-Batavus-11-=

Johannes Rota Roterodamo-Batavus-11-$

-11-Pays-Bas : Hollande

Hollande-Septentrionale-Westfrise-11-&

Amsterdam-11-+

Amsterdam-Compagnie néerlandaise des Indes orientales (VOC)-11-++

La Haye-11-=

Hollande-Méridionale-11-$

1641-1650

Henricus a Corput Dordracenus-11-$

Adrianus Hensbroeck Alcmariensis-11-&

Cornelius Coccius Horna-Batavus-11-&

Bernardus van Outheusden van Gorcom in Hollandt-11-$

Romboldus Hudde Amstelo-Batavus-11-+

Joannes Tromper Roterodamus-11-$

Johannes Hovius Hagiensis-11-=

Gerardus Pyll Viana-Batavus-11-$

Adrianus ab Arckel Woerda-Batavus-11-$

Nicolaus van der Laen Horna-Batavus-11-&

Matthæus Moens Purmerenda-Batavus-11-&

Joannes Brandyn Hagæ-comitanus-11-=

Henricus Verwer Amstelrodamensis-11-+

Gerrit Versiden Rotterodamensis-11-$

Janus de With Dordrechto-Batavus-11-$

Claes van Groendyck Leydensis-11-$

Simon Ingelius Amstelo-Batavus-11-+

Franciscus Reael Amstelo-Batavus-11-+

Adrianus Gool Hagiensis Batavus-11-=

Mathyas Pompe Dordrechto-Batavus-11-$

Adriaen Snouck Haga-Batavus-11-=

Petrus Splinter Roterodamensis-11-$

Matthæus Joye Harlemo-Batavus-11-$

Matthias van Gherwen Amstelodamensis-11-+

Maximilianus Boot Haga-comitanus Batavus-11-=

Joannes van der Meer van Berendrecht Haga-comitanus-11-=

Petrus Bouman van Teylinghen Amstelo-Batavus-11-+

Laurentius Geraertz. Amstelo-Batavus-11-+

Cornelis Cornelissen ter Ridder van Haerlem-11-$

Jacobus Brassica Cools Horna-Westfriso-11-&

Petrus Lastman Hollandus Amsterdamensis-11-+

Martinus Blaeuw Enchuysanus Batavus-11-&

Guilielmus Moutmaker Alcmarus Batavus-11-&

Adrianus Raap Amstelo-Batavus-11-+

Meynhardus Croocq Amstelo-Batavus-11-+

Jan Hartoghvelt Hollander van Rotterdam-11-$

Teodore van Castricum van Amsterdam wonachtich-11-+

Philippus Weveringhs Amstelodamo-Batavus-11-+

Caspar Barlæus Lugduno-Batavus-11-$

Thomas Clerke Delphensis-11-$

Conradus a Beuningen Amstelodamo-Batavus-11-+

A[d]rianus Boelissen Amsterodamensis-11-+

Arn. Brantw[yk] de Bloclant Dordracenus Batavus-11-$

Nicolaus Stoop Dordrechto-Batavus-11-$

Philippus Paludanus Hollandicus Amsterodamensis-11-+

Andreas Heemskerck Hollandus [?]-11-$

Cornelius Jacobi Hop Amstelodamensis-11-+

Gerardus Hamel dictus Bruyninx Heusden-Batavus-11-$

Jacobus Haringh Amstelodamensis Batavus-11-+

Joannes de Schelder Amstelodamensis Batavus-11-+

Cornelis Schellinger Amstelodamensis Batavus-11-+

Gerardus Tuning Hagæ-Batavus-11-=

Theodorus a Myerop Hagæ-Batavus-11-=

Joannes de Wale Amstelodamensis-11-+

Nicolaus Fagel Hagæ-comitanus Hollandus-11-=

Renerus Hooff van Huisduinen Hagæ-comitanus-11-=

Cornelius Briell Briela-Batavus-11-$

Theodorus Haga Ench[usa]-Batavus-11-&

Ghisbertus van Blyeel Wourda-Batavus-11-$

Gothofredus a Beuninghen Amstelo-Batavus-11-+

Lucas Timman Enchusa-Batavus-11-&

Johan Codde van der Burgh Enchu[sa]-Batavus-11-&

Joachimus a Wevelinchoven Haga-comitanus-11-=

Hugo van Rycke Delpho-Batavus-11-$

Laurentius Snellius de Royen Lugduno-Batavus-11-$

Wilhelmus Pansserus Brila-Batavus-11-$

Jacob Pesser Roterodamus-11-$

Petrus Soetens Hagæ-Batavus-11-=

Petrus Vromans Delpho-Batavus-11-$

Meynardus Segwaert Dordrecto-Batavus-11-$

Nicolaus van der Haer Hollandus [?]-11-$

Gerardus van der Does Haga-Batavus-11-=

Elias Helt Amstelo-Batavus-11-+

Henricus Reael Amstelo-Batavus-11-+

Isaacus Vossius Lugdunensis-Batavus-11-$

Bernard Ecmondt de Dordrecht Hollandois-11-$

Michael Hinlopen Amstelredamensis Batavus-11-+

Jacobus Wuytiers Amstelo-Hollandus-11-+

Joannes Stouters Steenberga-Brabantus-11-$

Jacobus van der Does Haga-Batavus-11-=

Joannes de Magistris Amstelrodamensis-11-+

Bruno van Ruiven Delpho-Batavus-11-$

Cornelius van der Hoeve Iselstadio-Batavus (IJsselstein ?)-11-$

Theodor Victoryn Batavus-Amsterdamensis-11-+

Fredericus Paavw Lugduno-Batavus-11-$

Regnerus van der Hem van Nederstein nobilis Amstela- Batavus-11-+

Nicolaes van Swanevelt van Leyden van geboorte-11-$

Jacobus Hoogenhouck Delpho-Batavus-11-$

Thomas Vallensis Delpho-Batavus-11-$

Adolphus Venator Enchusa-Batavus-11-&

Fridericus Jacobi Wrocht Amstelodamensis Batavus-11-+

Joannes ten Grotenhuys Amstelo-Batavus-11-+

Hillebrandus Rinnegom Alcmarianus-11-&

Gulielmus de Beveren Dordrechto-Batavus-11-$

Johan de Beveren Dordrechto-Batavus-11-$

Gualterus a Segwaert Dordrechto-Batavus-11-$

Fredericus Cousebant Haerlemensis Batavus-11-$

Adrianus Aelmonde Briela-Batavus-11-$

Cornelius Cloeck Amstelo-Batavus-11-+

Petrus van den Hove Harlemo-Batavus-11-$

Isbrandus Plempius Amstelo-Batavus-11-+

Gisbertus Plempius Amstelo-Batavus-11-+

Harmannus Coeckius Amstelo-Batavus-11-+

Gualterus a Lanschot Lugduno-Battavus-11-$

Hermannus de Groot Horna-Battavus-11-&

Theodorus Blanckert Roterodamo-Holandus-11-$

Jacobus Ruysch Dordrechto-Batavus-11-$

Joannes Knotter Lugduno-Batavus-11-$

Petrus Hooghlant Enchusanus-11-&

Joannes van Horn Belga Amstelus-11-+

Theodorus van der Nes Delphi-Batavus-11-$

Fredericus Lakenman Enchusa-Batavus-11-&

Janus Grotius Haga-Batavus-11-=

Jacobus Grotius Haga-Batavus-11-=

Joannes Verryss Goudanus Hollandus-11-$

Guilielmus van der Duyn n[obilis] Batavus Belga-11-$

Johannes Daasdonck Gouda-Batavus-11-$

Thomas Carbasius Hornanus-11-&

Joannes van Cassiopyn Haga-Batavus-11-=

Cornelius Rysburgh Dordracus-Batavus-11-$

Nicolaus Nicolai Dordrechto-Hollandus-11-$

Theodorus Schaep Amstelodamensis-11-+

Carolus van Peene Delpho-Batavus-11-$

Cornelius de Magistris Amstelrodamensis Batavus-11-+

Jacobus de Goyer Amstello-Batavus-11-+

Cornelius Berkel Lugduno-Batavus Belga nob[ilis]-11-$

Theodorus ab Hogendorp Haga-Batavus -11-=

Samuel Beyer Roterodamensis Batavus-11-$

Bonifacius a Kinschot Haga-Batavus-11-=

Henricus Poelhuys Amstelrodamensis Batavus-11-+

Hendrick van Hogendorp Rotteredamo-Batavus-11-$

Rombardus Jacobi Amstelo-Batavus-11-+

Theodorus Parys Amstelrodamensis Batavus-11-+

Wilhelmus van den Eynden Amstelrodamensis-11-+

Wigboldus Slicher Amstelodamensis Batavus-11-+

Jacobus van Wouwe Roterodamensis-11-$

Petrus van der Burch Delpho-Batavus-11-$

Jan Rosa Haga-Batavus-11-=

Laurentius Baeck Amstelo-Batavus-11-+

Guilielmus Boreel, Belgii confoederati reipublicae ad Galliarum regem legatus-11-$

Jacobus Boreel Guilielmi filius-11-$

Guilielmus Boreel Guilielmi filius-11-$

Theodorus de Vlamingk van Oudtshooren Hagæ-comitanus-11-=

Philippe d’Aersen Haga-Batavus-11-=

-11-Pays-Bas : Hollande

Hollande-Septentrionale-Westfrise-11-&

Amsterdam-11-+

Amsterdam-Compagnie néerlandaise des Indes orientales (VOC)-11-++

La Haye-11-=

Hollande-Méridionale-11-$

1651-1660

Joannes van Vianen Gorcomio-Batavus-11-$

Theodorus a Beresteyn Del[p]ho-Batavus-11-$

Cornelje van der Duyn Rotterodamo-Batavus-11-$

Petrus a Campen Amstelredamensis-11-+

Gisbertus a Campen Amstelodamensis-11-+

Tymen Hinloopen Amstelodamensis-11-+

Joannes Roscam Amstelo-Batavus-11-+

Jacobus van der Dussen Delpho-Batavus-11-$

Joannes Bicker Amstelodamensis-11-+

Louys Philibert Vernatti [Delpho-Batavo]-11-$

Guillelmus a Walwyck Lugduno-Batavus-11-$

Nicolaus a Kouwenhove Roterodamo-Batavus-11-$

Romanus van Wesel Alckmarianus-11-&

Frans Six van Amsterdam-11-+

W[ilhelmus] Doncker ut ’s-GravenHaege-11-=

Jacobus Onderwater Dordrechto-Batavus-11-$

Philippus Soetens Hagæ-Batavus-11-=

Nicolaus Magnus Lugduno-Batavus-11-$

Wilhelmus Roovers Dordrechto-Batavus-11-$

Ottho Hugo de Cuyck Myerop Lugduno-Batavo-11-$

Jacobus Francke Dordrechto-Batavus-11-$

Johannes Hasius Leidensis Lugduno-Batavus-11-$

Reynerus van der Burch Delp[h]o-Batavus-11-$

Gerardus Grootvelt Lugduno-Batavus, J.U.L.-11-$

Johan Rhode Borusso-Batavus-11-$

Joannes de Goyer Amstelodamensis-11-+

Jean Versyden Rottredam-Batavus-11-$

Johannes Muys van Holy Dordracenus-11-$

Thomas Punt de Rotterodam-11-$

Albertus de Wolff a Amstelredam-11-+

C[ornelius] Blyenborch Haga-Batavus-11-=

G[erhardus] van Rhyn Lugduno-Batavus-11-$

Joannes Henricus Brouwer Amstelo-Batavus-11-+

Andreas a Swaanswyck Haga-Batavus-11-=

Bartholomæus Crillaert Hollandus-11-$

Nicolaes Nooms Hollandus. *Décédé le 8 novembre 1655*-11-$

Jacobus a Velden Lugduno-Batavus-11-$

Engelbertus van der Myll Haga-Batavus-11-=

Benjamin de Geer Amstelodamensis-11-+

Cornelius Roch Amstelo-Batavus-11-+

Hermannus Richardus Oem Dordrechto-Batavus-11-$

Ericus Martini Haga-Batavus-11-=

Matthias van Biesten van Amsterdam-11-+

Adrianus Boogaert Delpho-Batavus-11-$

Petrus van der Dussen Delpho-Batavus-11-$

Guilielmus Blaeu Amstelæ-Batavus-11-+

Guilielmus de Vicq Amstelo-Batavus, [med. doctor]-11-+

Adolph Govers Tyelmanus Amstelo-Batavus-11-+

Pieter van Ryn van Amsterdam-11-+

Nicolaus Wyntgis van Hoorn-11-&

Jacobus Clock Alcmarianus-11-&

Johannes Bannincgh Amstel-Batavus-11-+

Gulielmus van der Loo Dordraco-Batavus, [J.U.D.]-11-$

Nicolas Vivien Belga, [J.U.D.]-11-$

Nicolaus van Opmeer Amstelodamensis-11-+

Franciscus Focanus Dordracenus-11-$

Hugo ’s Gravesande-11-$

Cornelius de Vries Amstelo-Batavus-11-+

Johannes Ruysch Haga-Batavus-11-=

Adrianus Kemels Hagacomitanus-11-=

Johannes van der Heyden Haga-Batavus-11-=

Guilielmus Beverovicius Joh. fil[ius] Dordrechto-Batavus-11-$

Petrus Schagen Alcmaria Batavus-11-&

Sebastianus van den Kerckhove Haga-Batavus-11-=

Franciscus Hermannus van Bergen Amstelæ-Batavus-11-+

Theodorus Graswinckel Delpho-Batavus-11-$

Antonius Reepmakerus Amstelo-Batavus-11-+

Hero Westerman Enchusa-Westfrisius-11-&

Libertus Hummelingius Amstelo-Batavus-11-+

Louis Huygens de Zuylichem Haga-Batavus-11-=

Gisbertus Eyckbergh Haga-Batavus-11-=

Didericus van Oss Bamestra-Batavus, J.U.D.-11-&

Petrus van Hertsbeeck Lugduno-Batavus-11-$

Theodorus Heemskerck van Beest Delpho-Batavus-11-$

Henricus Roosboom Dordraco-Batavus-11-$

Nicolaus Worst Amstelodamensis-11-+

Cornelius de Beveren Belga-11-$

Baltasar Basius Rotterodamo-Batavus-11-$

Joannes Valcke Haga-Batavus-11-=

Johan Jansz. van Oudaen Vlaerdingensis-11-$

Johannes van Aerssen Haga-Batavus-11-=

Adriaen van Loon van Amsterdam-11-+

Cornelius van der Wolff Gouda-Batavus-11-$

Albertus de Veer Haga-Batavus-11-=

Joannes Radermacher Amstelo-Batavus-11-+

Arnout Bailly Amstelodamensis-11-+

Theodorus Helt Amstelo-Batavus-11-+

Nicolaus van der Houck Haga-Batavus-11-=

Lambertus Buys Gauda-Batavus-11-$

Jacobus Beresteyn Delpho-Batavus-11-$

... Borman Haga-Batavus-11-=

Petrus Verwerf Gouda-Batavus-11-$

Gerrit Jansz. Treurum v[an] Rotterdam-11-$

Gerardus Velsenaer, Rotterdam-Batavus-11-$

Isaacq Del Court van Leyden-11-$

Jacob Hoogenhoeck van Zuytlant-11-$

Sibrandus Valckenier Amstelo-Batavus-11-+

… Casembroot Hollandus Hagensis-11-=

Henricus Doedyns Hollandus Haga-Batavus-11-=

... Schnoeckaert van Schaumburch nobilis Hollandus-11-$

Johannes Hooft Hollandus Haga-Batavus-11-=

Adrianus a Breen Amstelodamensis Battavus-11-+

Eduardus Blydenbergh Amstelæ-Batavus-11-+

Adrianus de Libaert Haga-Battavus-11-=

Wilhelmus Boreel Haga-Batavus-11-=

Jacob van Heeden Amstelo-Batavus-11-+

Arnoldus Vinck Haga-Batavus-11-=

Jacobus d’Orville Haga-Batavus-11-=

Constantinus van Baerle Harlemensis-11-$

Petrus Codde-11-$

Fredericus Thomas a Wevelinchoven Gorcomio-Batavus-11-$

Baltazar a Wevelinchoven Gorcomio-Batavus-11-$

Adrianus de Bye Haga-Batavus-11-=

Johannes a Kerchem Lugduno-Batavus-11-$

Petrus Baelde Lugduno-Batavus-11-$

Cornelius a Groenendyck Lugduno-Batavus-11-$

Rochus Kien Hagiensis-11-=

Nicolaus van der Dussen Delpho-Batavus-11-$

Daniel Gleeser nobilis Batavus-11-$

Jacobus van Hoeyff Gorcomio-Batavus-11-$

Johan van Zoutelande Haga-Batavus-11-=

Florentius Cloeck Amstelodamensis-11-+

Hendricus van Winteroy Worcomiensis-11-$

Jacobus Havius Haga-Batavus-11-=

Theodorus Semeyns Enchusa-Batavus-11-&

Joannes Cools Horna-Westfrisius-11-&

Petrus de Velare Enchusa-Westfrisius-11-&

Johannes van Baersenburch Haga-Batavus-11-=

Vincentius a Bronchorst Amstelo-Batavus-11-+

Joannes a Vloosweeck Amstelodamo-Batavus-11-+

Philippus Julius Lichtenborgh Heusda-Brabantus-11-$

Adrianus de Buysero Haga-Batavus-11-=

Gabriel Marselis Amstelo-Batavus-11-+

Carolus Heidanus Lugduno-Batavus (Joannes Hardanus ?)-11-$

Jan van Walsburgh Amsterdam-11-+

Nicolaus Coninck Horna-Westfrisius-11-&

Henricus Vossenburch Gouda-Batavus-11-$

Bartholomeus de Cromhout Amstelius-Batavus-11-+

Jacob Poppen Amstelius-Batavus-11-+

Franciscus Boucart Æger Amstelo-Batavus-11-+

Anthonius van de Ven A. ager Amstelo-Batavus-11-+

P. Schaep J. fi[lius] Amstelo-Batavus-11-+

Joannes Gansenborgh Gouda-Batavus-11-$

Wilhelmus ab Abbesteech Gouda-Batavus-11-$

Jean van Lith Amstelodamo-Batavus-11-+

Joannes Buys Waelwycensis-11-$

Daniel Boxel H. fi[lius] Gorinchemio-Batavus-11-$

Eduardus Cadyck diocesis Dussensis-11-$

Cornelius van Gheel Amstelo-Batavus-11-+

Abrahamus Boom Amstelo-Batavus-11-+

Joannes Moll Dordraco-Batavus-11-$

Gerbrandus Buyck Lugduno-Batavus-11-$

Petrus de Bye Haga-Batavus-11-=

Petrus a Forel [?]-11-$

Petrus de Graeff Amstelo-Batavus-11-+

Petrus Spiering Hollandus-11-$

Hugo Andre Ruysch Hollandus-11-$

-11-Pays-Bas : Hollande

Hollande-Septentrionale-Westfrise-11-&

Amsterdam-11-+

Amsterdam-Compagnie néerlandaise des Indes orientales (VOC)-11-++

La Haye-11-=

Hollande-Méridionale-11-$

1661-1670

Nicolaes Haerencarspel Hollandt d’Amsterdam-11-+

Cornelis Pompe de Meerdervoort Dordraco-Batavus-11-$

Franciscus Marcellus Gouda-Batavus-11-$

Johannes Saeghman Leerdammensis-11-$

Regnerius Pavius Hagacomitis-11-=

Henricus Hooft Amstelodamensis-11-+

Abrahamus Boddens Amstelo-Batavus. *Décédé le 31 juillet 1661*-11-+

Georgius Backer Amstelodamensis-11-+

Jacobus van Alenburch Delphensis. *Décédé le 1 juillet 1661*-11-$

Joannes de Veer Haga-Batavus-11-=

Henricus Morris Haga-Batavus-11-=

Bernardinus Moens Amstelodamensis-11-+

Henderick van Schuylwerf Haerlemensis-11-$

Joannes ab Erpecum Amstelodamensis-11-+

Guillielmus Vyfhuysen Haga-Batavus-11-=

Matthias de Beuningen Amstelodamensis-11-+

Thomas Puyner Westfrisia-Batavus-11-&

Johannes Schimmelpenningh Haga-Batavus-11-=

Adrianus Doncker Gouda-Batavus-11-$

Johannes Deym Haga-Batavus-11-=

Petrus Blaeu Amstelo-Batavus-11-+

Jacob van der Meer Haga-Batavus-11-=

Theodorus Harencarspel Amstelo-Batavus-11-+

Petrus Bernard Amsterdam-11-+

Franciscus Beens Amstelo-Batavus-11-+

Cornelis van Wouw Hagiensis-11-=

Berent Aldringa Hagiensis-11-=

Henricus Spiegel Amstelo-Batavus-11-+

Martinus de Groen Alcmariensis Hollandus-11-&

Franciscus Spieringh India Surattanus, 4 augusti 1662-11-++

Abrahamus Alewyn Amstelo-Batavus-11-+

Hugo van den Eynden Haga-Batavus-11-=

Franciscus de Vroede Amstelo-Batavus-11-+

Ægidius de Glarges Haerlemo-Batavus-11-$

Adrianus de Pla Lugduno-Batavus-11-$

Cornelius De La Porte Haga-Batavus-11-=

Jacobus Quina Caroli f[ilius] Amstelodamensis-11-+

Arnoldus Druyvesteyn, J.U.D., Haerlemo-Batavus-11-$

Joannes Cau Amstelo-Batavus-11-+

Hillebrandus den Otter Amstelo-Batavus-11-+

Cornelius Rampius Lugduno-Batavus-11-$

Franciscus van der Voort Amstelodamensis-11-+

Cornelius de Groot Horna-Batavus-11-&

Arnoldus Hoeuft Rotomagus (Dordrecht ?)-11-$

Everardus Vorstius Lugduno-Batavus-11-$

Cornelius Meurier Dordraco-Batavus-11-$

Abrahamus Meurier Dordraco-Batavus-11-$

Johan de Heyde Delpho-Batavus-11-$

Johannes van Heemskerck, J.U.D., Heusdanus-11-$

Michael Pauw Amsterdammensis-11-+

Jacobus Knaep Steenberga-Brabantus-11-$

Matthias van den Broeck Amstelodamensis-11-+

Gaspar van den Broeckesse Hagæ-comitensis-11-=

Johannes van der Stael Haga-Batavus, J.U.D.-11-=

Willebrordus Vroesius Batavus Rotterodamensis-11-$

Cornelius de Jonge Hagensis-11-=

Cornelius van Vhelen Haga-Batavus-11-=

Sibertus Coeman Amstelodamensis-11-+

Wilhelmus van Broeckhuysen Amstelodamensis-11-+

Ferdinandus Achilles a Kuffeler Amstelæ-Batavus-11-+

Salomon Echtenius Harlemo-Batavus-11-$

Michael Pompe Dordrechto-Hollandus-11-$

Jacobus van de Graeff Dordrechto-Batavus-11-$

Jacob a Popta Amstelodamensis-11-+

Cornelis van Helmont Amstelodamensis-11-+

Jacobus van Rouuerge [?]-11-$

Jacobus de la Fosser (A.D.L., D 221, p. 406) [?]-11-$

Johannes de la Fosser (A.D.L., D 221, p. 406) [?]-11-$

Abrahamus van Cleeff Schiedamo-Batavus-11-$

Jeremias Noiret Amstelodamo-Batavus-11-+

Wilhelmus van Schuylenburgh Haga-Batavus-11-=

Justus van der Beke Hahga-Batavus-11-=

Jacobus Dobben Harlemensis-11-$

Bonaventurer Broene Amstelo-Batavus-11-+

Adrianus van Bleyswyck Scidamo-Batavus-11-$

Hieronimus de Haase Amstelo-Batavus-11-+

Isaacus Vethuse Rotterodamo-Batavus-11-$

Jacobus Arminius Amstelo-Batavus-11-+

Maerten van Sypesteyn Hilgomo-Batavus-11-$

Jacob Vredenburch van Adrichem Delpho-Batavus-11-$

Guilielmus van der Graeff Delpho-Batavus-11-$

Jacobus van Ravesteyn Hagæ-comitanus-11-=

Petrus van Campen Leidensis-11-$

Adrianus de Jonge Hagiensis-11-=

Nicolaus Honscoop Batavus natus in castris Antonino dictis Albinianis-11-$

Theodorus Pater Amstelodamensis-11-+

Theodorus Golius Lugduno-Batavus-11-$

Reynerus Hinloopen Horna-Westfrisius-11-&

Gerardus Hinloopen Horna-Westfrisius, J.U.D.-11-&

Franciscus Bardou Lugduno-Batavus-11-$

Hugo van Stryen Haga-Batavus-11-=

Gerardus van der Nyenburgh ex Alckma-Batavus-11-&

Petrus Schaep Amstelo-Batavus-11-+

Johannes de Coolwyck Delfo-Batavus-11-$

Hugo van der Steyn Haerlemo-Batavus-11-$

Jacob Andreas Ryckart Amstelo-Batavus-11-+

Stephanus Geraers Haerlemo-Batavus-11-$

Joannes Bladegem a Woenssel Dordraco-Batavus-11-$

Rudolphus Eelbo Dordraco-Batavus-11-$

Casparus Braems Wesop-Batavus-11-+

Nicolaus Vermeiren Amstelo-Batavus-11-+

Sebastianus Pittavin Indo-Batavus, 20 octobris 1668-11-++

Arnoldus Boucherie Roterdamo-Batavus-11-$

Barnardo van Bergen Amsterdamo-Batavus-11-+

A[rnoldus] Spoor Haga-Batavus-11-=

Johannes Tedingh Berckhout Haga-Batavus-11-=

Petrus a Ruychoven Dordraco-Batavus-11-$

Jan Lieftinck Delpho-Batavus, J.U.D.-11-$

Et tres Hollandi qui nomina non dederunt (III-1669)-11-$

Vastardus Groeninx Roterodamo-Batavus-11-$

Theodorus a Bleyswyck Delpho-Batavus-11-$

Cornelius Nierop Haga-Batavus-11-=

Gaspar van Diemen Amstelo-Batavus-11-+

Nicolaus Pater a Raveschot Nardæ-Batavus-11-+

Matthias Luls Batavus-11-+

Henricus a Bobbart Amstelodamensis-11-+

Joannes van Cingelshouck Batavus-11-$

Theodorus Rycke Batavus [?]-11-$

Cornelius van Goor Amstelrodamensis-11-+

Johannes Schepers Rotterodamo-Batavus-11-$

Petrus de la Court Lugduno-Batavus-11-$

Guilielmus van der Voort Belga [?]-11-$

-11-Pays-Bas : Hollande

Hollande-Septentrionale-Westfrise-11-&

Amsterdam-11-+

Amsterdam-Compagnie néerlandaise des Indes orientales (VOC)-11-++

La Haye-11-=

Hollande-Méridionale-11-$

1671-1680

Gerardus Pyll [?]-11-$

Theodorus de Raet Haga-comitanus-11-=

Mathias Pompe Dordraco-Batavus-11-$

Conrardus a Wevelinchoven Vianensis-11-$

Joannes Adamus Hageman Hagaecomitanus-11-=

Adrianus de Blyenborgh Dordraco-Batavus, J.U.D.-11-$

Jacobus de Blyenburgh de Naeltvyck Dordrechto-Batavus-11-$

Joannes Poppen Amstelo-Batavus-11-+

Godofridus Poppen Amstelodamensis-11-+

Joannes Steenowen Amstelo-Batavus-11-+

Arnoldus van Alsem Roterodamo-Batavus-11-$

Johannes Eleman Lugduno-Batavus-11-$

Wilhelmus van den Bergh Roterodamo-Batavus-11-$

Maerten Hoogen-houck Delpho-Batavus-11-$

Johannes Hoogenhouck Delpho-Batavus-11-$

Michael de Putter Haga-Batavus-11-=

Petrus Cuysten Amstelo-Batavus-11-+

Adrianus Sonmans Roterodamo-Batavus-11-$

Auwelius Fabritius Harlemo-Batavus-11-$

Cornelius Massis Lugduno-Batavus-11-$

Cornelius Hop Amstelodamo-Batavus-11-+

Reynerus Schaep Haga-Batavus-11-=

Julius van de Moere Lugduno-Batavus-11-$

Henrick Vockestaert Delpho-Batavus-11-$

Joan Heemskerck van Beest Delpho-Batavus-11-$

Sebastianus Becker d’Amsterdam-11-+

Abraham van Alphen Lugduno-Batavus-11-$

Paulus Scheffers Roterodamo-Batavus-11-$

Petrus Timmers Rotterdamo-Batavus-11-$

Theodorus van Alphen Lugduno-Batavus-11-$

Johannes Meerman (Heerman) Lugduno-Batavus-11-$

Adrianus Paets Roterodamus-11-$

Laurentius a Ravesteyn Haga-Batavus-11-=

Johannes Huydecoper Amstelodamensis-11-+

Petrus Casembrootius Haga-Batavus-11-=

Adrianus Paets Roterodamus-Batavus-11-$

Petrus van der Dussen Delfo-Batavus-11-$

Henricus van Willigen Lugduno-Batavus-11-$

Jacob de Wale Amstelodamensis-11-+

Daniel Goes Haga-Batavus-11-=

Ludovicus de Geer de Kyrhuyse (Amsterdam ?)-11-+

Petrus Hooft Amstelo-Batavus-11-+

Bartholomæus ab Assendelff Lugduno-Batavus eques-11-$

Henricus Cornelius de Letter Amstelrodamensis-11-+

Jacobus Ansloo Amstelodamensis-11-+

Cornelius van Varick Lugduno-Batavus-11-$

Petrus Leyenaer Harlemo-Batavus-11-$

Johannes van der Does Haga-Batavus-11-=

Adrianus Pauw Haga-Batavus-11-=

-11-Pays-Bas : Hollande

Hollande-Septentrionale-Westfrise-11-&

Amsterdam-11-+

Amsterdam-Compagnie néerlandaise des Indes orientales (VOC)-11-++

La Haye-11-=

Hollande-Méridionale-11-$

1681-1689

Guilhelmus Ardes Haga-Batavus-11-=

Cornelius de Lange Gouda-Batavus-11-$

Jacobus Johannes van Santen Haga-Batavus-11-=

N. Groenendyck Gouda-Batavus-11-$

Joannes van der Hoeven Roterodamo-Batavus-11-$

Johannes Jacobus Wierts Haga-Batavus-11-=

Gerardus ab Hoogeveen Lugduno-Batavus-11-$

Bonchadus Verschuer Horna-Westfrisius-11-&

Guillielmus Kaaeckmes Gauda-Batavus-11-$

Johannes Hosius Alckmaria-Batavus-11-&

Nicolaus Six Amstelo-Batavus-11-+

Jan van Noortwyck Haga-Batavus-11-=

Caspar de Kinschot Haga-Batavus-11-=

Paulus Verschuer Roterdamo-Batavus-11-$

François Pauw Haga-Batavus-11-=

Cornelius Schockfevre van Dorp Lugduno-Batavus-11-$

Nicolaus Thomas de Marck, dominus de Leur, Haga-Batavus-11-=

Cornelius van der Tocht Gouda-Batavus-11-$

Arnoldus van Alsem, J. Cons., Roterodamo-Batavus-11-$

Jeremias Ghys Lugduno-Batavus-11-$

Simon ab Alphen Danielis filius Lugduno-Batavus-11-$

Petrus Fannius van Outhaarlem Haga-Batavus-11-=

Henricus Nolthenius a Riele Brilae-Batavus-11-$

Johannes van Gellinchuysen Harlemo-Batavus-11-$

Quiryn van Stryen Amstelodamensis-11-+

Rombout Aernouts Amstelodamo-Batavus-11-+

Jacob Reepmaecker Amstelodamo-Batavus-11-+

Jean Raven Lugduno-Batavus, J.U.D.-11-$

Joannes ab Assendelft Lugduno-Batavus, J.U.D.-11-$

Cornelius Gisbertus van Campen Amstelodamensis-11-+

Ewaldus a Bleyswyck Henrici filius Delpho-Batavus-11-$

Carolus Guilhelmus ab Huls Haga-Batavus-11-=

Abrahamus van der Heul Delpho-Batavus-11-$

Cornelius Bicker a Zwieten Amstelodamensis-11-+

Jacobus Bruynsteen Harlemo-Batavus, J.U.D.-11-$

Servatius Hannot junior Roterodamo-Batavus, J.U.D.-11-$

Arnoldus Hoogenhoeck Delpho-Batavus-11-$

Wilhelmus Buys Amstelodamensis-11-+

Cornelius Bors a Waveren Amstelodamensis-11-+

Franciscus de Roovre Dordraco-Batavus-11-$

Adrianus Duyvens Haga-Batavus-11-=

Bonifacius van der Haer Haga-Batavus-11-=

[N.] Boogaert van Beloys Delphis-11-$

Van den Bosch Haga-comitis-11-=

Eduardus Prins Rotterodamensis Batavus-11-$

Benjamin Witheyn [?]-11-+

Gerardus Meerman Lugduno-Batavus-11-$

Govert van Slingelandt Dordraco-Batavus-11-$

S. van Slingelandt Dordraco-Batavus-11-$

Gysbertus de Kinschot Haga-Batavus-11-=

Guillaume de Neurembergh Dordrechto-Batavus-11-$

Johannes Verschuer Horna-Batavus-11-&

Pieter van Wouw Haga-Batavus-11-=

Leonardus van der Duyn Lugduno-Batavus-11-$

Joannes Thoen Rotterodamo-Batavus-11-$

Petrus van Bilderbeecq Lugduno-Batavus-11-$

Daniel Basius Baltasari filius Rotterodamo-Batavus-11-$

Theodorus Sismus Roterodamo-Batavus-11-$

Jacobus Adrianus Cunæus Lugduno-Batavus-11-$

Daniel Codde Haga-Batavus-11-=

Stapel Codde Haga-Batavus-11-=

Isbrandus L’Amoureux Haga-Batavus-11-=

Cornelius Gerardus Fagel Lugduno-Batavus-11-$

Joannes Moller Amstelo-Batavus-11-+

Gerbrant van den Mierop Rotterodamo-Batavus-11-$

Arnold van Suylen de Nyevelt Rotterodamo-Batavus-11-$

Henricus Cluiskens Harlemo-Batavus-11-$

Jacobus Bosschaert Haerlemo-Batavus-11-$

Jean Bosschaert Haerlemo-Batavus-11-$

Jacob van Stryen Haga-Batavus-11-=

Guilhelmus Graswinckel Delphorum Batavus-11-$

Petrus Crommelin Harlemo-Batavus-11-$

Joannes de Witt Dordraco-Batavus-11-$

Hubertus Jacobus van der Meer van Alphen Hagæ-comitis-11-=

Joannes Franciscus Correge Hagæ-comitis-11-=

Carolus Codde Haga-Batavus-11-=

Heymannus Ignatius Kievit Roterodamo-Batavus-11-$

Allardt van der Duyn Rottrodamo-Batavus-11-$

Petrus Arnoldus Kievit Rotrodamo-Batavus-11-$

Joannes Deutz Amstelodamensis-11-+

Cornelius Ascanius van Sypesteyn Haerlemo-Batavus-11-$

Joannes Brouwer Haga-Batavus-11-=

Gerardt de Lange Rotterodamo-Batavus-11-$

Wilhelmus Gerardus van Campen Amstelodamensis-11-+

Petrus Dierkens Harlemo-Batavus-11-$

Franciscus van Bergen Amstelo-Batavus-11-+

Jacobus Ludovicus de St. Gilles Amstelædamensis-11-+

Jacobus Ysbrans Roterodamo-Batavus-11-$

Henricus Hooft Amstelo-Batavus-11-+

Petrus Slicher Amstelo-Batavus-11-+

Henricus Decquer Amstelo-Batavus-11-+

Henricus Soutman Haarlemo-Batavus-11-$

-11-Pays-Bas : Hollande

Hollande-Septentrionale-Westfrise-11-&

Amsterdam-11-+

Amsterdam-Compagnie néerlandaise des Indes orientales (VOC)-11-++

La Haye-11-=

Hollande-Méridionale-11-$

1721-1781

Isaac Cornelius Engelbertus Beeckman eques Batavus Harlemensis-11-$

Petrus van de Poll eques Batavus Amstelodamensis-11-+

Arnoldus Ignatius Maximilianus van de Polle Batavus (*nom raturé*)-11-$

-12-Pays-Bas : Zélande, Brabant, Limbourg-Maastricht

Zélande-12-*

Flandre zélandaise-12-#

Brabant des États-12-+

Limbourg-Maastricht-12-=

1602-1610

Maximilianus van Bekercke Medioburgo-Zelandus-12-*

F. Kussius (Russius) Medioburgensis Zelandus-12-*

Joannes Boreel Middelburgensis Zelandus-12-*

Adrianus Looperus Middelburgensis-12-*

Petrus Gemart Brabantus-12-+

Alexander Magnus nobilis Zelandiae Middelburgensis-12-*

Martinus Cornelius Caesar Goesanus-12-*

Jacobus Cocq Zirizæus-12-*

Adrianus van Dyck Ziriczeensis-12-*

Imannus a Zuylandt Zirixzæo-Zelandus-12-*

Petrus de Gomiecourt Trajectinus-12-=

Hermannus de Gomiecourt Belga-12-=

Constantinus Magnus Middelburgo-Zelandus-12-*

Christianus Vaggher Zælandus, J.U.D.-12-*

Johannes Smallegange Goesa-Zeelandus-12-*

Gulielmus Cooman Middelburgo-Zeelandus-12-*

Nicolaus Nysmans a Trajecto Superiori ad Mosam-12-=

Philippus van der Hooghe Middelburgo-Zelandus-12-*

Johannes Matens Vlissinga-Zelandus-12-*

Antonius de Huybert Zirizæo-Zelandus-12-*

Andreas de Huybert Zirizæo-Zelandus-12-*

Janus Knuytius Middelburgensis Zeelandus-12-*

Samuel Baccherus Brabantus-12-+

Lævinus de Witte Zierizæus-12-*

Samuel Visscher Middelburgensis-12-*

Gerardus Marini Crommom Goesanus-12-*

Jeremias Ferdinandi Middelburgensis-12-*

Jacobus Balduini f[ilius] a Berlicom Sylvæducensis-12-+

Ægidius Waetervliet Zeelandus-12-*

Hubertus de Berghes Middelburgo-Zeelandus-12-*

Cornelis Oostdyck van ter Goes-12-*

Leonardus van der Boot Zirzæus-12-*

Jacobus Blaubeen Goesa-Zeelandus-12-*

Adrianus Nicolai Belga Vlissingensis-12-*

Jacobus de Berchem Zeelandus-12-*

Nicolaus Reigersberg-12-*

-12-Pays-Bas : Zélande, Brabant, Limbourg-Maastricht

Zélande-12-*

Flandre zélandaise-12-#

Brabant des États-12-+

Limbourg-Maastricht-12-=

1611-1620

Petrus van Roosbeke Zeelando-Middelburgensis-12-*

Joannes Philippus de La Maze [?]-12-+

Leonardus Cats Brouwershavius-12-*

Cornelius van Schuylen Selandus-Gosanus-12-*

Hugo Blocq Zelandus et Flissinganus-12-*

Jacobus Pornardus Zelandus et Flissinganus-12-*

Jacobus Schot Zelandus et Flissinganus-12-*

Gualterus van Clootwyck Gartrudismontanus. Is ictu bombardae jaculatus obiit 15 junii 1612-12-+

Johannes Vosbergius Middelburgo-Zeelandus-12-*

Jacobus a Vrybergen Thola-Zelandus-12-*

Levinus a Vrybergen Thola-Zelandus-12-*

Cornelius Junius Zirizea-Zelandus-12-*

Nicolaus Meyros Metteliburgo-Zelandus-12-*

Daniel de Slachmulder Middelburgo-Zelandus-12-*

Jacobus Fredrici Luyt Middelburgo-Zeelandus-12-*

Adrianus Cannoye Arnemuda-Zelandus-12-*

Jacobus Croock Middelburgo-Zeelandus-12-*

Johannes de Renialme Belga [?]-12-*

Ghysbertus a Duvenvoorden de Monte Sanctae Ge[r]trudis-12-+

Arnoldus Altena Belga-12-+

Jacobus So …… Arnemudensis Zelandus-12-*

Jacobus de Lanschot Bredano-Brabantinus-12-+.

Adrianus de Pilgrum Bredano-Brabantinus-12-+.

Henricus ten Harff Middelburgensis Zelandus-12-*

Guilelmus Boreel Middelburgensis Zelandus-12-*

Andreas Sutendael Mastrehanus-12-=

Petrus Crocus Middelburgo-Zelandus-12-*

Johannes Lucius Verio-Zelandus-12-*

Daniel Gruterus Zelando-Middelburgus-12-*

David Reigersberch Verio-Zelandus-12-*

Madee de Cats Zeelandois-12-*

Petrus van den Velde Zirizæo-Zelandus-12-*

Arnoldus Ceterius Middelburgo-Zelandus-12-*

Hubertus Stoutenburch Zirizæo-Zelandus, J.U.L.-12-*

Marinus a Vrybergen Thola-Zeelandus-12-*

Jobus Cooperus Zirizæa-Zeelandus-12-*

Franchiscus Nescius Adrianus [?]-12-+

Cornelius Staefvenisse Zirizæus Zelandus-12-*

Paul Bouduwins de Berlicom-12-+

Roulandt Magnus Middelbourchgensis Zeelandus-12-*

Godefridus de Haestrecht Belga Drunensis-12-+

Jacob Janssen van Gripskercke Zeelandus-12-*

Adrianus Soetwater Goeza-Zelandus-12-*

David Somer Verio-Zelandus-12-*

Sebastianus Adriani Middelburgo-Zeelandus-12-*

Adrianus Citerus Middelburgo-Zeelandus-12-*

Cornelius Munnix Zeelandus-12-*

Carolus M.B. et liber baro de Brecht-12-+

Johannes Honich Vera-Zeelandus-12-*

Roelandus Magnus Middelburgo-Zeelandus-12-*

Cornelius Tenys Middelburgo-Zelandus-12-*

Martinus Tenys Middelburgo-Zelandus-12-*

Joannes Junius Zirizæus Zelandus-12-*

Lævinus Cock Zirczæa-Zelandus-12-*

Johannes Steengracht Ziriczæo-Zelandus-12-*

Johannes Goubarts A…… ?-12-+

Guilhelmus Roelsius Medioburgicus-12-*

Gerardus van den Broeck Bredanus-12-+

Adrianus ten Haeff Middelburgo-Zelandus-12-*

Herman de Huybertt Zirizæa-Zelandus-12-*

Ægidius Rietenburgius Middelburgo-Zeelandus-12-*

Adrianus Breeman Sommelsdyckanus Zeelandus-12-*

Gaspar Spaen Sommelsdyckanus Zeelandus-12-*

Joannes Antonius de Rouck Bergopzomanus-12-+

Joannes Croonius Goes-Zeelandus-12-*

Henricus comes de Bergh baro in Heeswic-12-+

Apollonius Inglinus Vlissinga-Zelandus-12-*

Johannes Inglinus Vlissinga-Zelandus-12-*

Adrianus van Ryen Oisterhoutanus-12-+

Wilhelmus Zagarus Goesa-Zeelandus-12-*

Ferdinandus Magnus Middelburgo-Zelandus-12-*

Jan Baptista Zagarus Goesa-Zeelandus-12-*

Jacobus Bom Goesa-Zelandus-12-*

Ægidius Ekema de Vrise Middelburgensis Zeelandus-12-*

-12-Pays-Bas : Zélande, Brabant, Limbourg-Maastricht

Zélande-12-*

Flandre zélandaise-12-#

Brabant des États-12-+

Limbourg-Maastricht-12-=

1621-1630

Petrus Magnus Middelburgo-Zeelandus-12-*

Petrus Boreel Middelburgo-Zeelandus-12-*

Antonius de Florano Middelburgo-Zeelandus-12-*

Cornelius Baltens Zeelando-Goesanus-12-*

Franciscus Schoonhovis Middel[burgo]-Zeelandus-12-*

Nicolaus Kien Vera-Zelandus-12-*

Maximiliaen van Nispen Middelburgo-Zelandus-12-*

Cornelius Bom Goesa-Zelandus-12-*

Gerardus Taetsius Arnemuda-Zelandus, phil. et med. doctor-12-*

Abraham de Brauw Tholo-Zelandus-12-*

Joannes Woesting Ruræmundensis-12-=

Cornelius Coorne Middelburgo-Zelandus-12-*

Jacobus Fridericus a Renesse Medioburgus-12-*

Johannes ab Hes, dominus ad Piershil et ad Wena, Middelburgo-Zelandus-12-*

Guilielmus Pousius Zirzæa-Zelandus, J.L. *ou* J.D.-12-*

Adrianus van der Lisse Zirizæa-Zelandus-12-*

Jacobus Nachtegael Middelburgo-Zelandus-12-*

Wilhelmus Nachtegael Middelburgo-Zelandus-12-*

Philibertus de Tuyll de Serooskercke Zeelandiæ-12-*

Theodorus Ekema de Vrise Middelburgo-Zelandus-12-*

Guilliam van der Aa d’Hamd [?]-12-+

Jacobus Croon Goesa-Zelandus-12-*

Antonius Soetwater Goesa-Zelandus-12-*

Pedro van Audenhoven van Gemert in Brabant-12-+

Johannes Bom Goesa-Zeelandus-12-*

Henricus Welleus Zeelandus Middelburgensis-12-*

Guilielmus Montens Bredanus-12-+

Ægidius Borsselaer Goes-Zeelandus-12-*

Petrus Borselaer Goesa-Zeelandus-12-*

Anthonius Struve Thola-Zelandus-12-*

Martinus Stavenisse Ziericzæa-Zelandus-12-*

Hieronimus van der Straeten Goesa-Zeelandus-12-*

Joannes Ceterus Middelburgo-Zeelandus-12-*

Apollonius Vettius Middelburgo-Zeelandus-12-*

Gerardus van der Nisse Goesa-Zeelandus-12-*

Cornelius van der Nisse Goesa-Zeelandus-12-*

Johannes Barlandus Goesa-Zelandus-12-*

Abrahamus Boreelius Middelburgo-Zeelandus-12-*

Henderyck Pelgerums de Bye van Hartogenbos. Pro inscriptione nihil solvit-12-+

Adam Schellart van de Geysteren Geisterensis-12-=

Daniel Gowaerts van Holle [?]-12-+

Johannes Apollonii Vera-Zeelandus-12-*

Leonardus Pool Veria-Zeelandus-12-*

Guilielmus Snellen Bredanus-12-+

Christianus Snellen Bredanus-12-+

Bartholomæus Cavius (Cau) Middelburgo-Zelandus-12-*

Henricus Thibautius Gzn Vosmeer Middelburgo-Zeelandus-12-*

Bartholomæus Cannoye Zeelandia-Batavus et Arnemuydanus-12-*

Qirin Willemsen van Gripskerque-12-*

Cornelius Brouwerus Middelburgo-Zelandus-12-*

Cornelius Stapelius Stenbergo-Brabantus-12-+

Bonifacius de Jonge Middelburgo-Zeelandus-12-*

Cornelius Peterszon Zirizæa-Zelandus-12-*

Joannes van der Welt Bredanus-12-+

Daniel Brienens Slusanus-12-#

Mathias Ophovius Mosætrajectensis Brabantinus-12-=

Antonius Vorstermans Ruremondensis-12-=

Johan van der Perre Middelburgo-Zelandus-12-*

Isaac Godin Zeelandus Middelbourg-12-*

Abrahamus van Oosten Beropzomius Brabantus-12-+

Jasper van Velthoven Beropsomius Brabantus-12-+

Antonius van Veltem Beropsomus Brabantus-12-+

Bartholomæus Teellinck Zirizea-Zeelandus-12-*

Melchior de Jong Medioburgensis Zelandus-12-*

Jacobus ab Hoffdyck Sommelsdycka-Zeelandus-12-*

Jacob Gertse Ziriczeus Zeelandus-12-*

Petrus de Tuyl de Serooskercke Middelburgo-Zelandus-12-*

Ghysbertus Colvius Tola-Zelandus-12-*

-12-Pays-Bas : Zélande, Brabant, Limbourg-Maastricht

Zélande-12-*

Flandre zélandaise-12-#

Brabant des États-12-+

Limbourg-Maastricht-12-=

1631-1640

Cornelius de Brune Goesano-Zelandus-12-*

Cornelius Backerus Ziricxzeæ-Zelandus-12-*

Adrian Havermans de Breda-12-+

Henricus van de Gracht Sylvæducensis, J.U.L.-12-+

Arnoldus Hagens Bredanus-12-+

Gerardus a Schoonhoven Middelburgo-Zelandus-12-*

Stephanus van Bellem Z[iri]zeeus-12-*

Matteus Driewehge van der Goes-12-*

H. van der Swalmen Isendico-Flander-12-#

Rochus Mogghe Zirizæa-Zelandus-12-*

Cornelius Constant Middelburch Zeelandia-12-*

Petrus Moorthamer Medioburgo-Selandus-12-*

Christianus van der Goes Middelburgensis Zeelandus-12-*

Cornelius a Cromstryen Zirizea-Zeelandus-12-*

Theodorus Arnoldi Wachmans B. habitans prope Bredam-12-+

Theodorus Boreel Middelburgensis Zelandus-12-*

David van der Nisse Goesa-Zeelandus-12-*

Joannes Costerius Silvæducensis-12-+

Johannes Colve Slusa-Flander-12-#

Jacobus Overhey Suylandigis-12-*

Daniel van Bomberghen Medioburgo-Zelandus-12-*

Justus de Hubert Zirizæa-Zeelandus-12-*

Jaspar Beyharts Silvæducensis-12-+

Norbertus Mutsaerts Silvæducensis-12-+

Joan van Sutphen Silvæducensis-12-+

M[arcellus].T. van Berghen Silvius-12-+

Jobus Waersegger Zirizæa-Zeelandus-12-*

Jacobus Slot van der Goes ut Seelant-12-*

M[artinus] Veth Middelburgo-Zelandus-12-*

Adrianus ab Altena Flissinga-Zelandus-12-*

Melchior Wynckelman Middelburgensis Zeelandus-12-*

Jacques de Gripskercke Middelburgensis-12-*

Ja[c]ques de Manmaker Medioburgo-Zeelandus-12-*

Guilielmus Ciermans Sylvæducensis-12-+

Bartholomæus van de Glyndt Willemstada-Brabantus-12-+

Elias van de Vin Middelburch in Zeelant-12-*

Paulus de Hubert Zirizæa-Zelandus-12-*

Jacobus Boreel Middelburgo-Zeelandus-12-*

Thomas van Cassiopyn uut Brabant-12-+

Johan de Jonge Medioburgo-Zeelandus-12-*

Johannes de Vos Zelandus V[erius]-12-*

Petrus van der Straeten Goeza-Zelandus-12-*

Hieronimus de Tuyll de Serooskercke Thola-Zelandus-12-*

Valerius Keyser van Bollant Goesa-Zeelandus-12-*

Philippus a Leefdael Meeuwensis-12-+

Simon van Beaumont Middelburg-Zelandus-12-*

Joannes Reigersberg Medioburgo-Zelandus-12-*

P[aulus] Campe Middelburgo-Zelandus-12-*

Johannes Lacker Medioburgo-Zelandus-12-*

Adrianus van der Goes Middelburgensis Zeelandus-12-*

Marcus de La Palma Medioburgo-Zeelandus-12-*

Johannes Junianus Brunæus Medioburgo-Zelandus-12-*

Arnoldus a Flodroff Crevureius-12-+

Jacobus Marthenus Middelburgensis-12-*

Joachimus Hugens Tholæ-Zelandus-12-*

Adrianus Craen Medioburgo-Zelandus-12-*

Mathieu de Clootwyk Gertrudt-Batavus-12-+

Petrus van Andel Sylvæducensis-12-+

Cornelius Cau Middelburgo-Zelandus-12-*

Herman Pottey de Ter Veer Zeelandus-12-*

Andreas Schotus Flessynga-Selandus-12-*

Johannes Pous Ziericzæa-Zelandus-12-*

Petrus Mogghe Ziriczæa-Zelandus-12-*

Martinus Vettius Medioburgo-Zeelandus-12-*

Godefridus a Casteren Sylvius-12-+

Cornelius Ekema de Vrise Middelburgo-Zeelandus-12-*

Rochus Hofferus Zirizæa-Zelandus-12-*

-12-Pays-Bas : Zélande, Brabant, Limbourg-Maastricht

Zélande-12-*

Flandre zélandaise-12-#

Brabant des États-12-+

Limbourg-Maastricht-12-=

1641-1650

Nicolaus Eversdyck Goesa-Zeelandus-12-*

Gulielmus Verbruggius Vlissinga-Zelandus-12-*

Johan van Gelre Thola-Zeelandus-12-*

Johan van Stapelen Goesa-Zeeland-12-*

Joannes Baptista van Mald Brabantinus-12-+

Philippus Reynegom a Mildeburga Zelandus-12-*

H[ieronymus] Gruiwardt Goesa-Zelandus-12-*

Danckert Westhouck van der Goes-12-*

Paulus van der Biestraeten Bredanus-12-+

Henricus Vloots Sylvæ-ducensis-12-+

Jacob van der Mersche Medioburch-Zelandus-12-*

Gosvinus van Bernagien Breda-Brabantinus-12-+

Jean Ekama de Vrise Middelburgensis-Zelandus-12-*

Joannes Stouters Steenberga-Brabantus-12-+

Joannes van der Merct Medioburgo-Zeelandus-12-*

Petrus ab Alteren Middelburgo-Zeelandus-12-*

Cornelius van Vrybergen Medioburgo-Zelandus-12-*

Johannes van Grypskercke Medioburgo-Zeelandus-12-*

Gulielmus a Vrybergen Medioburgo-Zeelandus-12-*

Jacobus Borsselaer Goesa-Zelandus-12-*

Laurentius Meebale Goesa-Zelandus-12-*

Joannes Dorperus Medioburgo-Zelandus-12-*

Balduinus Boone Goesa-Zeelandus-12-*

Johannes a Clootwyck Medioburgo-Zeelandus-12-*

Wilhelmus Boreel Medioburgo-Zelandus-12-*

Johan Croock Medioburgo-Zelandus-12-*

Jacobus Reigersbergius Medioburgo-Zelandus-12-*

Bonifacius Ockers Zirizaea-Zelandus-12-*

Johan Caus Zelandois-12-*

Petrus van Campen Zeelandus-12-*

Marinus Westerwyck Goesa-Zelandus-12-*

Johan van de Poele Medioburgo-Zelandus-12-*

Gaspar Ingels Vlissinga-Zeelandus-12-*

Jan Baptista de Grati van Maestricht-12-=

Gerardus Doncker Brabanson de compté de Megen-12-+

Petrus Franciscus Conincx Mosae-Trajectensis Brabantinus-12-=

Matthias de Grati Trajectinus-12-=

Guilhelmus Roelsius Middelburgo-Zeelandus-12-*

Arnoldus a Kessel Sylvæducensis-12-+

Johannes Honich Vlissinga-Zelandus-12-*

Dominus Guilielmus Boreel, Belgii confoederati reipublicae ad Galliarum regem legatus-12-*

Jacobus Boreel Guilielmi filius-12-*

Guilielmus Boreel Guilielmi filius-12-*

-12-Pays-Bas : Zélande, Brabant, Limbourg-Maastricht

Zélande-12-*

Flandre zélandaise-12-#

Brabant des États-12-+

Limbourg-Maastricht-12-=

1651-1660

Johannes Hofferus Zirizæa-Zelandus-12-*

Jacobus van Slingelant Zirizæa-Zelandus-12-*

Johan Huyssen Middelburgo-Zelandus-12-*

Johannes van Reygersberg Medioburgo-Zelandus-12-*

Balduinus a Santvoort Silvæducensis-12-+

Marinus van Crommon Zelandus de Goesae-12-*

Lambertus Bollius Brouwershavio-Zelandus-12-*

Isaac Parent Slusa-Flander-12-#

Gillis van Kesse[l] Bolducque-12-+

Johannes van der Strynge Medioburgo-Zelandus-12-*

Philippus de Broucqsant Isendycka-Flander-12-#.

Joannes Moermans Montensis ad Zomam-12-+

Georgius Cremer de Boxmeer-12-+

Nicolaus de Witte, J.U.D., Medioburgo-Zelandus-12-*

Rochwyn Loovens Brabantinus-12-+.

Apollonius Ingels Medioburgensis-12-*

Jacob Hoogenhoeck van Zuytlant-12-*

Jan Meyer van Eppengnie [?]-12-+

Marinus van Vryberghe Thola-Zelandus-12-*

Nicolaus van Vryberghe Thola-Zelandus-12-*

David van Orliens Medioburg-Zeelandus-12-*

Abraham de Brauw Slusa-Flander-12-#

Johannes van Blotenburgh Sylvæducensis Brabantinus-12-+

JM de Brauw Tola-Zelandus-12-*

Joannes van Velthoven Brabantinus Bredanus-12-+

Henricus Stas Mosætrajectinus-12-=

Cornelius Pous Zirckzæa-Zelandus-12-*

Cornelius de Bruyne Goesa-Zelandus-12-*

Benjamin Cromstrien Zirizea-Zelandus-12-*

Joannes Buys Waelwycensis-12-+

Eduardus Cadyck diocesis Dussensis-12-+

Cornelius Mogghe Z[iric]zæa-Zelandus-12-*

Franciscus de Muelenare Brabantus-12-+

Franciscus de Bons Bredanus-12-+

Johan Elfsdyck Medioburgo-Zelandus-12-*

-12-Pays-Bas : Zélande, Brabant, Limbourg-Maastricht

Zélande-12-*

Flandre zélandaise-12-#

Brabant des États-12-+

Limbourg-Maastricht-12-=

1661-1670

M. v[an] Baerlant Goesae-Zelandus-12-*

Petrus Baute Medioburgo-Zelandus-12-*

Did. Vleugels Berga ad Zoomanus-12-+

Ludovicus Seilmakers Flissinga-Zeelandus-12-*

Nicolaus Swancke Vera-Zelandus-12-*

Jacobus van Aaffoirden Silvæducensis-12-+

P. Sbacker (Backer) Rosevallensis-12-+

Martinus Houckgeest Bergensis-12-+

Cornelius Bottius Zelandus-12-*

Marinus ‘t Hooft Zelandus-12-*

Joannes Pessers Mosa-Trajectinus-12-=

Ægidius Ekema de Vrise Middelburgo-Zelandus-12-*

Bartholomaeus Cau Zirixzea-Selandus-12-*

Jacobus Schockfever Medioburgo-Zelandus-12-*

Antonius van de Perre Medioburgo-Zelandus-12-*

Godefridus Bollekens Donganus-12-+

Franciscus Veltens Medioburgo-Zelandus-12-*

Joannes van Rhee, jurisconsultus, Flessinga-Zelandus-12-*

Joannes van den Bosch Ruremundanus-12-=

Arnoldus de Cranenbroeckq Helmondanus-12-+

Franciscus Brouwerius Berg op Zomanus Brabantus-12-+

Jacobus Knaep Steenberga-Brabantus-12-+

Jacobus Ignatius Durlens Cardesiensis [?]-12-+

Guilielmus Snellen Breda-Brabantus-12-+

Franciscus Keetlaer Goesa-Zeelandus-12-*

Johan Vingers (Ringers) Camp-Vera-Zelandus-12-*

Ægidius Jeelen Belga-Mosæ-Trajectinus-12-=

[Joannes] De Crauwelaer Flander Axella-12-#

Thomas Weir Zeelandia Campveer-12-*

Gerardus Kuysten Silvæ-ducensis-12-+

Petrus Vervoort Bredanus-12-+

Henricus Copes Sylva-Brabantinus-12-+

Joannes Petrus van den Brande Medioburgo-Zelandus-12-*

Jacob Winckelman Flissinga-Zelandus-12-*

Joannes van Cauwenberch Trajectinus ad Mosam-12-=

Petrus Veth Medioburgensis-12-*

Guilielmus van Eyck (Eys) Mosatrajectinus-12-=

Petrus van Essen Medioburgo-Zeelandius-12-*

-12-Pays-Bas : Zélande, Brabant, Limbourg-Maastricht

Zélande-12-*

Flandre zélandaise-12-#

Brabant des États-12-+

Limbourg-Maastricht-12-=

1671-1680

Johannes Guilielmus ab Haren Mosa-Trajectinus-12-=

Salomon le Sage Medioburgo-Zelandus-12-*

Fredericus Isaac a Levendael Trajectinus ad Mosam-12-=

Michael Isaacy a Levendael Trajectinus ad Mosam-12-=

Gerhardus Lambrechtsen Flissinga-Zelandus-12-*

Joannes van Beeck Bredanus-12-+

Gerardus van Beeck Bredanus-12-+

Gerardus Balduinus van Zantfoort Sylvæducensis-12-+

Guilielmus Pesters Trajecto-Mosensis-12-=

Jean Heldewier Mosæ-Trajectensis-12-=

-12-Pays-Bas : Zélande, Brabant, Limbourg-Maastricht

Zélande-12-*

Flandre zélandaise-12-#

Brabant des États-12-+

Limbourg-Maastricht-12-=

1681-1689

Joannes van den Nouwelandt Bredanus-12-+

Johannes Sprongk Bredanus-12-+

Thomas Alexander Coninck Vera-Zelandus-12-*

H. (ou Joh.) Grypskerck Thola-Zelandus-12-*

Laurentius Thyssen Flessinga-Zelandus-12-*

Johannes Verstraten Zirizea-Zelandus-12-*

Jacobus Pesters Mosa-Trajectinus-12-=

Ernestus Pesters Mosa-Trajectinus-12-=

Adrianus Henricus van Slype Mosa-Trajectinus-12-=

Aquila a Lodensteyn Medioburgo-Zelandus-12-*

Nicolaus Leyten Erpensis ex Majoria Silvaeducensi-12-+

Imannus Cau Hulsta Flandrus-12-#

Cornelis de Witte Zelandus Vlissinga-12-*

Abrahamus van Mil Sylvaducensis-12-+

Andreas Josephus de Vaes, dominus de Kesselt, Mosæ-Trajectinus eques-12-=

Henricus Ackersdyck Sylvæducensis-12-+

Ignatius Henricus Theodorus ab Horst [?]-12-=

Johannes Radermacher Medioburgo-Zelandus-12-*

Caspar Le Lion Vlissinga-Zelandus-12-*

Apollonius van de Perre Medioburgensis Zelandus. *Décédé le 26 février 1685*-12-*

Lucas Schorer filius Joannis Medioburgo-Zelandus-12-*

Petrus Pedecour junior Medioburgo-Zelandus-12-*

Daniel Fannius Medioburgo-Zelandus-12-*

Bonifacius Biscop Vlissinga-Zelandus-12-*

Bernardus van Riel Bredanus Batavus-12-+

Petrus Damius Bredanus Brabantinus-12-+

Matthias Bevers Hulsta-Flander-12-#

Joannes Baptista de Brienen dominus de Guysselt Trajectensis-12-=

-12-Pays-Bas : Zélande, Brabant, Limbourg-Maastricht

Zélande-12-*

Flandre zélandaise-12-#

Brabant des États-12-+

Limbourg-Maastricht-12-=

1721-1781

-----------------------------

-13-Pologne, Russie, Estonie, Lettonie, Lithuanie

Pologne et les pays Baltes-13*

Poméranie-13-+

Prusse-13-=

Silésie-Lusace-13-#

1602-1610

Jaroslaus Burggravius, liber baro de Dona (Dhona *ou* Dohna)-13-*#

Jacobus de Cieszanau Cieszanemski, nobilis Polonus-13-*

Joannes de Stanislawzie Stanislawski, nobilis Polonus-13-*

Joannes a Slupia Slupsky, nobilis Polonus ex palatinatu Craccoviensi-13-*

Bartholomeus Eben Vratislaviensis Silesius-13-#

Balthasar Tilesius Hirschbergensis Silesius-13-#

Bernhardus Wesselius Caunensis Lihtuanus-13-*

Cyriacus Perbandt Regiomontanus Borussus-13-=

Christophorus Martini Regiomontanus Borussus-13-=

Philippus Julius dux Stettinensis-Pomeraniae-13-+

Eccardus von Wedum Pomeranus-13-+

Bernhardt Buggenhagen furstlicher Pomerischer hofmeister undt marschalckh-13-+

Erasmus Kussow illustrissimi Pomeraniae principis c. et cam.-13-+

Fridericus Gerschow, aulicus illustrissimi ducis Pomeraniae-13-+

David Horn Pomeranus, aulicus illustrissimi ducis Pomeraniae-13-+

Joachim Budde Pomeranus-13-+

Christophorus von der Lanken Pomeranus-13-+

Joachimus Volradus Tribsees Pomeranus-13-+

Ludovicus Schleinn Regiomontanus Borussus-13-=

Nicolaus Potoczki de Potoke dominus in Grodcke Polonus-13-*

Hieronimus Praetorius Polonus-13-*

Joannes a Berg in Herrndorff Silesius-13-#

Gualtherus Rosenbergk Borussus-13-=

Georgius Sredsinsky-13-*

Sigismundus Sredsinsky-13-*

Jacobus Mochinger Torunensis Borussus-13-=

Sigismundus liber baro a Kitlitz in Malnitz et Eysenberg, dominus in Spremberg-13-#

Franciscus Behr Pomeranus-13-+

Petrus Myrschæus Stolpensis Pommeranus-13-+

Fridericus a Sack Silesius-13-#

Thomas Groszman Freistadiensis Silesius-13-#

Georgius a Bock Silesius-13-#

Christophorus a Nostitz Silesius-13-#

Henricus Bhaer Borussus-13-=

Joannes de Berzevice Berzevic Prutenus-13-=

Christophorus de Berzevice Berzevic Prutenus-13-=

Georgius Pankowski eorundem dominorum Berzeviciorum famulus natione Prutenus-13-=

Fridericus Magnus a Minckwitz in Drenau Lusatus-13-#

Joannes Fridericus a Minckwitz in Drenau Lusatus-13-#

Laurentius a Borkau Prutenus-13-=

Salomon Leipper Dantiscanus Borussus-13-=

Matthæus Faintz Bregensis Silesius-13-#

Florianus Drosst a Drossdovitz Silesius-13-#

Christophorus liber baro a Schellendorff et Adelsdorff, dominus in Königsbruck-13-#

Michael Gysza Germanus-Prutenus regalis provincia-13-=

Albertus Gysza Germanus-Prutenus regalis provincia-13-=

Joannes Jungschultz Elbingensis Borussus-13-=

Johannes Coy Elbingensis Borussus-13-=

Paulus ab Orzechowiec Orzechowski Polonus-13-*

Stanislaus ab Orzechowiec Orzechowski Polonus-13-*

Johannes Croker Polonus-13-*

Paulus Croker Polonus-13-*

Ludovicus a Pudewels Borussus-13-=

Joannes Firley b. b. de Dambrowicza Polonus-13-*

Andreas Firley b. b. de Dambrowicza Polonus-13-*

Christophorus a Schlieben Lusitanus-13-#

Ludovicus a Kalckstein Borussus-13-=

Johannes Eberhardus a Tettauw-13-=

Abel a Tettauw Borussus-13-=

Christophorus Röber Budissinus Lusatius-13-#

Wolfgangus a Kreutzen Borussus-13-=

Joannes Neander Rastenburgensis Borussus-13-=

Salomon Neugebauer de Cadano Borussus-13-=

Julius Christianus a Wobersnow-13-+

Ludovicus von Rammin-13-+

Alexander Humiecky De Richt-13-*

Gregorius Staniewsky Polonus districtus Posnaniensis-13-*

Arnoldus ab Holten, reipublicae Dantiscanae senator, legatus Hansae Teutonicae-13-=

Reinholdus Heydenstein Borussus-13-=

Conradus Heydenstein Borussus-13-=

Sigfridus liber baro a Kittlitz in Mallnitz et Eisenberg, dominus in Spremberg, etc.-13-#

Abrahamus a Kreckwitz de Wirchwitz Silesius-13-#

Hieronymus von Nostitz zu Neundorff Silesius-13-#

Melchior von Rechenberg Silesius-13-#

Dominus Johannes Schoenmann, medicus, natione Sedinensis Pomeranus-13-+

Matthias Litznerus, J.U.D., Prutenus-13-=

Joannes Ernestus Schröer Dantiscanus Borussus-13-=

Otto d’Uttman eques Silesius-13-#

Johannes Christianus dux Silesiae, Lignicensis et Bregensis-13-#

Adamus a Stang Silesius-13-#

Henricus a Reideburgk Silesius-13-#

Christophorus Hedwigerus Lignicensis Silesius-13-#

Joachimus Below Pomeranus-13-+

Philippus Frichius Pomeranus-13-+

Corll von Danowitz von Jonstorf auf Kertsch-13-+

Wilhelm von Proëk Preussen-13-=

Nicolaus de Burckhaus et Stoltz Silesius-13-#

Joannes Hofman Wunschelburgensis Silesius-13-#

Petrus Branitzki a Rustza Polonus-13-*

Joannes Kvasnicky Polonus-13-*

Joannes Ligocki Polonus-13-*

Jacobus Wilmannus Gryphiswaldia-Pomeranus-13-+

Adam Koethen aus Pommeren-13-+

Nicolaus Christophorus Radzivil dux in Olyka et Nieswiesz-13-*

Albertus Stanislaus Radzivil dux in Olyka et Nieswiesz-13-*

Joannes Kobylsky Polonus nobilis-13-*

Stanislaus Constantinus Lenicki nobilis Polonus-13-*

Adamus Klusowsky (Hulowski) nobilis Polonus-13-*

Jacobus Spriosogincqky nobilis Polonus-13-*

Christophorus Trzelatkowski nobilis Polonus-13-*

Uldaricus dux Stetini, Pommeraniae, etc.-13-+

Nicolaus Dunin Modliszowski comes de antiqua Sterzin Polonus-13-*

Stanislaus Dunin Modliszowski comes in antiqua Sterzinia Polonus-13-*

Dionysius a Pudewels Pomeranus-13-+

Wilhelm von Wacholtz Pomeranus-13-+

Bernhardus Saurman a Jeltschio Silesius-13-#

Leutholdus Saurman a Jeltschio Silesius-13-#

Cunradus Saurman a Jeltschio Silesius-13-#

Valentinus Seidelius Olaviensis Silesius-13-#

Andreas a Novawies b. b. Ruskowski, pincerna S.R.M. in Polonia-13-*

Gothofredus Weidnerus Saganâs-Silesius-13-#

Nicolaus Henelius Silesius-13-#

Henricus Slebysch Silesius-13-#

Joachimus Andreæ Stralsundensis Pomeranus-13-+

Bernhardus a Königseck Borussus Skandawiensis-13-=

Georg von der Gröben Borussus-13-=

-13-Pologne, Russie, Estonie, Lettonie, Lithuanie

Pologne et les pays Baltes-13*

Poméranie-13-+

Prusse-13-=

Silésie-Lusace-13-#

1611-1620

Samuel Swatopeth liber baro de Zawada-13-*

Petrus Swatopeth liber baro de Zawada Polonus-13-*

Martinus Gruncrüger Silesius-13-#

Joannes marchio a Mirow Myszkowski Gonzaga-13-*

Martinus Stanislaus Rzepanowski, praefectus marchionis a Mirow-13-*

Mauricius Canne Livo, ejusdem illustrissimi domini marchionis a Mirow aulicus-13-*

Gregorius Camermannus Dantiscanus Borussus-13-=

Gottfriedt von Kottwitzh-13-#

Henrich Schuman von Danzik-13-=

Adamus de Tylice Tylicki eques Polonus-13-*

Adamus Trebnitz Praepositus Crusnicensis-13-*

Joachimus Maltzan liber baro de Wartenbe[r]g et Pentzelin in Militz-13-#

Otto Henricus Maltzan liber baro de Wartenberg et Pentzelin in Militz-13-#

Carolus a Brand Silesius-13-#

Nicolaus Basselier von Dansick aus Preusen-13-=

Dietrich von Mulheim Schlesier-13-#

Gedeon Fischer Hirschperga-Silesius-13-#

Maximilian von Knobelsdorff Silesius-13-#

Bernhardus Jacob Wratislaviensis-13-#

Heinricus a Birckholtz Lusatus-13-#

Johannes Georgius marchio Brandenburgensis, Prussiae, Stetini et Pomeraniae-13-+-13-=

Georgius Ossolinsky de Osselin palatinides Sandomiriensis-13-*

Johannes Zeidlerus Lauba-Lusatus-13-#

Johannes von Vietinghoff Curlan[d]us-13-*

Adamus Gall a Kreckwitz eques Sylesius-13-#

Sigfridus a Thaden eques Sylesius-13-#

Jacobus Tesszowic Polonus-13-*

Bernhard Taegen (Laegen) Borussus-13-=

Daniel Faber Stetino-Pomeranus-13-+

Arnoldus Dilgerus Gedanensis Borussus-13-=

Johannes Borckman Gedanensis Borussus-13-=

Sigismundus a Nimitz Silesius-13-#

Sigismundus a Seidlitz Silesius-13-#

Theodoricus a Nimitz Silesius-13-#

Johannes Peucerus Strelensis Silesius-13-#

Henricus Gärtner Budissina-Lusatius-13-#

Nicklaus von Diebutsch auf Mlitsch-13-#

Thomas de Zamosci Cn. Hon. Capitaneus-13-*

Alexander-Sigismundt H liber baro a Zedlitz-13-#

Wolffgangus Christianus a Nibelschitz eques Silesius-13-#

Valentin Arithmæus Lignitio-Silesius phil. et J.U. doctor-13-#

Johannes Rochlitz Stetino-Pomeranus-13-+

Arnoldus Bauer Dantiscanus Borussus-13-=

Jacobus Hallus (Gallus) Colberga-Pomeranus-13-+

Christianus Hennig Gedanensis Borussus-13-=

David Strenstzke Gedanensis-13-=

Adamus Constantinus Ligesza a Bobrek-13-*

Johannes Ligesza a Bobrek-13-*

Stanislaus Lycszko a Riglicszo-13-*

Adamus Woinowsky praeceptor superiorum trium nobilium [Bobrek *et* Riglicszo]-13-*

Christophorus Riccius Stetino-Pomeranus-13-+

Johan Wittich von Bötsch eques Silesius-13-#

Job Christuf von Hocke eques Silesius-13-#

Florianus Thilo Ligio-Silesius-13-#

Nikolaus von Waldauw Silesius-13-#

Conrad Friedrich von Mohl Silesius-13-#

David von Mohl Silesius-13-#

Sigismund von Gelhorn-13-#

Fridericus vom Stein Regiomonte-Borussus-13-=

Hassell von Gladisz auf Kaue auss der Schlesie auss dem fürstenthuem Gross Glogau-13-#

Friderich von Schkopp auf Heintzendorff auss der Schlesie auss Gross Glogau-13-#

Johannes Widwerus Lusatus-13-#

Rudolphus Seydlicius liber baro a Schenfeld-13-#

Albrecht Felix von Lukawicze-13-#

Bartholomæus Büthner Borussus-13-=

Rhabanus Giese Prutenus-13-=

Fridericus Monavius Wratislaviensis Silesius-13-#

Heinricus a Haugwitz Schlesien in Grosz Ebisch-13-#

Georgius vom Lohne Revaliensis-Livonus-13-*

Joannes Pruserus ex Glogaviensis Silesius-13-#

Gregorius Göbbius Glogaviensis Silesius-13-#

Nicolaus Pohl Borussus-13-=

Gabriel Schuman Dantiscanus Borussus-13-=

Gottfried Engelhardt Silesius-13-#

Friderich Hobe Pomeranus-13-+

-13-Pologne, Russie, Estonie, Lettonie, Lithuanie

Pologne et les pays Baltes-13*

Poméranie-13-+

Prusse-13-=

1621-1630

Cornelius Winholdt Lituanus-13-*

Nicolaus Ebenn Vratislaviensis Silesius-13-#

Martianus Goraisky de Goraj-13-*

Daniel Hein Gedanensis-13-=

Henricus Hein Dantiscanus Borussus-13-=

Martin Borck (Bondt) aus Pommern-13-+

Caspar von Gerstorff (Berstorff) aus Schlesien-13-#

Georgius a Rauschke Borussus-13-=

Martinus Tilesius Hirschberga-Silesius-13-#

Adamus Gottofredus a Gerssdorff Silesius-13-#

Maximilianus a Gersdorff Silesius-13-#

Petrus Raymarus Gryphenhaga Pomeranus-13-+

Johannes de Sbąskyn Sbąski Polonus-13-*

Albertus Zurowski Polonus-13-*

Wilhelm von Polentz a Porusie-13-=

Petrus Engver Colbergensis Pomeranus-13-+

Theodorus a Polentz Borussus-13-=

Samuel Drochyctynsky Polonus-13-*

Petrus Drochyctynsky Polonus-13-*

Alexander Drochyctynsky Polonus-13-*

Volmarus Farensbach comes in Karkus, gubernator Rucensis et Zernecensis-13-*

Johan Heinrich von Hohbergh Silesius-13-#

Casparus ab Hobergk Silesius-13-#

David ab Eichheuser Silesius-13-#

Augustus ab Eichheuser-13-#

Carolus Hermann Regiopontanus Lusatus-13-#

Adam von Moschwitz in Schlesien-13-#

Bernhardt von Plato Pomeranus-13-+

Heinricus S. R. I. dapifer haereditarius, liber baro de Waltburgk, natione Borussus-13-=

Johannes Fabianus a Kottwitz eques Silesius-13-#

Christophorus Nassovius Suebosinas Silesius-13-#

Melchior Schick Reichenbachensis Silesius-13-#

Michael Mylius Elbingensis Borussus-13-=

Achatius Junior Burggravius et baro a Dhona (Dona *ou* Dohna) natione Borussus-13-=

Marcus Heideman Stralsundensis Pomeranus-13-+

Georgius Widemannus Gorlicensis Lusatius-13-#

Georgius Henricus a Bülow Livonus-13-*

Robertus Robertinus Salfeldius Borussus-13-=

Ernst von Nibelschitz eques Silesius-13-#

Christophorus Schimmelfennig Regio-Borussus-13-=

Albertus Friese Regiomontanus Borussus-13-=

Gregorius Biber Vratislavia-Silesius-13-#

Ludovicus Friese Regiomontanus-Borussus-13-=

Nicolaus de By Elbingensis Prutenus-13-=

Christoph Frantz de Gablentz eques Silesius-13-#

Otto de Nostitz eques Silesius-13-#

Johan Henningk aus Preussenn-13-=

Heinrich von Schweintz aus Schlesien-13-#

Maximilianus von Knobelsdorff eques Silesius-13-#

Luca Magnus von Kottwitz auss Schlesien-13-#

Siegemund Kretz Gorlicensis Lusatus-13-#

Adam Sebysen a Marschwitz Silesius-13-#

Henrich Brusky Vratislaviensis Silesius-13-#

Matthias Gagalsky presbyter Polonus-13-*

Martinus Hollandt Dantiscanus Borussus-13-=

Johannes Gessingk Dantiscanus Borussus-13-=

Andreas Kiesling Budissinus Lusatus-13-#

Christophorus de Bnin Opalinsky, palatinides Posnaniensis-13-*

Lucas de Bnin Opalinsky, palatinides Posnaniensis-13-*

Paulus Kulicky Polonus-13-*

Adamus a Schliewitz Silesius-13-#

Johannes a Schweinichen Silesius-13-#

Johannes Freudenberg Vratislaviensis-13-#

Paulus Holmes Riga-Livonus-13-*

Christophorus Plass Mariaeburgensis Borussus-13-=

Ernestus Pröitt Dantiscanus Borussus-13-=

Tobias Grantz Gorlicensis Lusatus-13-#

Christianus Labes von Stetin auss Pommeren-13-=

Heinricus Joachimus de Schulenburgh Lusatus-13-#

Otto Ernestus Maydell Livonus-13-*

Matthæus Craussen Dantiscanus Borussus-13-=

Jacobus Crausen Dantiscanus Borussus-13-=

Georgius de Conari Slupecki eques Polonus-13-*

Johannes Flügell Riga-Livonus-13-*

Jacobus a Stellingwerff Moscovita [?]-13-**

Joachim Pritwitz Silesius Breslaw-13-#

Johannes Seidlitz Silesius Breslaw-13-#

Andreas comes de et in Leszno, palatinides Belzensis, dominus Baranow et Wlodawa, 1630-13-*

Raphael comes de et in Leszno, palatinides Belzensis, dominus in Baranow, Wlodawa, 1630-13-*

Adamus Thomas Schawstor Störmwindt Silesius Reichentalensis-13-#

-13-Pologne, Russie, Estonie, Lettonie, Lithuanie

Pologne et les pays Baltes-13*

Poméranie-13-+

Prusse-13-=

Silésie-Lusace-13-#

1631-1640

Fridericus Ernestus Erb Leobschuzensis Silesius-13-#

Christophorus a Krackwiz eques Silesius-13-#

Sigismund von Kräckwitz eques Silesius-13-#

Caspar von Kreckwitz-13-#

Nicolaus ab Haugwitz eques Silesius-13-#

Georgius a Nostitz eques Silesius-13-#

Casparus a Stosch eques Silesius-13-#

Leonhardt von Nostitz eques Silesius-13-#

Georg von Kotterwitz eques Silesius-13-#

Assman von Höck eques Silesius-13-#

Johannes Ammonius Bethania-Silesius-13-#

Samuel de Lipcelipski-13-*

Adrian von der Linde Prutenus-13-=

Daniel Eskenn Thoruniensis Borussus-13-=

Georgius Esken Elbingensis Borussus-13-=

Michael Nicolaus a Zebrzydowice Zebrzydowsky capitaneus Landskoron-13-*

Franciscus Florianus a Zebrzydowice Zebrzydowsky capitaneus Landskoron-13-*

Adam Reuter Cotbusius Lusatus-13-#

Joannes Martinus a Cygow Podoski eques Polonus-13-*

Petrus Zegocky nobilis Polonus-13-*

Georgius Pansovius Stralsundo-Pomeranus-13-+

Philip Oesler Sedino-Pommeranus-13-+

Balthasar Harder Dantiscanus Borussus-13-=

Alexander a Waden Dantiscanus Borussus-13-=

Paulus Grantzin Rugiowalda-Pomeranus-13-+

Petrus Hillius Stolpa-Pomeranus-13-+

Alexander Czaplic de Szpanow eques Polonus-13-*

Johannes Georgius a Stentzsch eques Silesius-13-#

Salomon Förster Gorlicensis Lusatus-13-#

Janusz Radzivil, S. R. Imp. princeps in Bierze ac Dubinski dux-13-*

Wencislaus Pückler eques Silesius-13-#

Fridericus a Thorhaken nobilis Livonus et in Erwalen haereditarius-13-*

Henricus Dönhoff nobilis Livonus haereditarius in Ilgen-13-*

Maximilianus Ernestus Burggravius et comes a Dohna, dominus in Wartemberg-13-#

Georgius Neuman Gorlicensis Lusatus-13-#

Joannes a Bueninghen Dantisco-Borussus-13-=

Georg Scholtz Vratislaviensis Silesius-13-#

Christoph Rigeman Riga-Livonus-13-*

Otto von Walsleben e(c)ques Pommeranus-13-+

Christian Schwartze Gryphiswaldo-Pomeranus-13-+

David Mevius Gryphiswald-Pomeranus-13-+

Felix von Podewilss eques Pommeranus-13-+

Michael Laurinus Elbinga-Borussus-13-=

Adrian a Borck (Barth) eques Pommeranus-13-+

Cristhophorus Ritius Aentensis [?]-13-+

Laurentius Mielonsky Polonus-13-*

Adam Riccius Pomeranus-13-+

Adamus Kazanowsky de Kazanow palatinides terrarum Podoliae-13-*

Alexander Korybut dux in Wisniowiec-13-*

Georgius Korybut dux in Wisniowiec-13-*

Gerhardus Brandis Borussus-13-=

Gerhard Bartsch Borussus-13-=

Dethard Brandis Borussus-13-=

Petrus Skibicki nobilis Polonus, palend. Cujavie-13-*

Stephanus Wydzga de Rzeizyca Polonus nobilis-13-*

Stanislaus a Brzezie Landzkorenski Polonus-13-*

Albrecht Friederich Durschen von Königsbergen-13-=

Godfried Cretschmar Vratislaviensis Silesius-13-#

Philipp Holzbecher Vratislaviensis Silesius-13-#

Albrecht Rosenberg Gedanensis Borussus-13-=

Jochim von Kleyst-13-=

Sigismundus Conradt Cracovia-Polonus-13-*

Johannes Rüdiger Gedano-Borussus-13-=

Ulricus Wenceslaus liber baro a Bieberstein, dominus in Forst et Pförten-13-#

Joannes Maslonicky Polonus-13-*

Georg Rudolph vonn Bomsdorff Guben Niederlaussnitz-13-#

Constantinus Marstallarn Pomeranus-13-+

Andreas de Przima Prziemski-13-*

Franciscus Henricus Spintler (Spietler) Sebusianus-13-#

Petrus de Poliezna Kochanowsky eques Polonus, 1 octobris 1648 (*nom biffé*)-13-*

Sigismundus Przyemski-13-*

Nicolaus Krupka gentilhomme Polonus-13-*

Petrus Schmuta de Lachovice Polonus-13-*

Joachimus Hirtenius Silesius-13-#

Christophorus Melhorn Regiomontanus Prussus-13-=

Briccius Nicolaus de Przevamb Przevembsky-13-*

Otto Joachimus Burggravius a Dohna-13-#

Conradus Fridericus Burggravius a Dohna-13-#

Vladislas de Lesnou Polonus-13-*

Joannes Casimirus Poloniae Sueciaeque princeps-13-*

Joannes Carolus comes a Conopat, S. Mariae in Wachoetia administrator-13-*

Johan Burchard Pomeranus-13-+

Hanss Sigmundt von Kanitz auss Schlesien-13-#

Georg Rohtgiesser Schlara Pomeranus-13-+

Eduardt Bartsch von der Demuht Borussus-13-=

Frantz Weiher nobilis Borussus-13-=

Rembold Crockow nobilis Borussus-13-=

Matthæas Clos Vratislaviensis Silesius-13-#

Henrich Bartsch van der Demuht Borussus-13-=

Christophorus Wylam Polonus-13-*

Michael Schurer Polonus-13-*

Vladislaus Niemsinsk in Czerntechow Polonus-13-*

Alexander Czaplicz Szpanoreski eques Polonus-13-*

Stanislaus Wilkowsky de Wilkowice eques Polonus-13-*

Joannes Slichting de Bukowice eques Polonus-13-*

Christoff Röderen Prussus-13-=

-13-Pologne, Russie, Estonie, Lettonie, Lithuanie

Pologne et les pays Baltes-13*

Poméranie-13-+

Prusse-13-=

Silésie-Lusace-13-#

1641-1650

Georgius Lohde Livonus-13-*

Christian Weier de Regio-Prussorum-Monte-13-=

Constantinus Lindershausenn Torunensis Prusus-13-=

Christophel Rzeczycky Polonus-13-*

Andreas Rzeczycky Polonus-13-*

Johannes Naborowski Polonus-13-*

Paulus de Orzechowice Orzechowski Polonus-13-*

Nicolaus de Orzechowice Orzechowski Polonus-13-*

Constantinus Adamus Dantiscanus Borussus-13-=

J.N. Tomkowicze Polonus-13-*

Christoff von Wiedebach auss der Niederlausitz-13-#

Johann Baldasar Charisius Glogâ-Silesius-13-#

Georgius Bierlein Nissa-Silesius-13-#

Jacobus Martignius a Beringa Dantisca-Borussus-13-=

Jacobus Kronberger Thorunensis Prussus-13-=

Jacobus Johannes Taube n[obilis] Livonus-13-*

Franciscus Fridericus Olhaffen de Schellenbach nob[illis] Silesius-13-#

Christoff Vitzthumb von Eckstedt nobilis Lusatus-13-#

Constantinus Lubomirski comes de Visnicz palatinides Cracoviensis-13-*

Jehann Ernestus von Tschammer eques Silesius Olsnensis-13-#

Samuel de Grybow Grybowski eques Polonus-13-*

Stephanus Weglenski eques Polonus-13-*

Johannes Philippus Colmer Dantiscanus Borussus-13-=

Frantz von Güntersberg Pomeranus-13-+

Georgius Arnold Grünb[erg] Silesius-13-#

Andreas Baumgarten Thoruniensis Borussus-13-=

Daniel Wachschlager Thoruniensis Borussus-13-=

Bernhard a Dewitz Pomeranus-13-+

Georgius Crachowski nobilis Polonus-13-*

Joannes de Zamoscie Zamoysky, comes in Tarnov et Jaroslav Calusiensis-13-*

Andreas Maximilianus Trzcinski eques Polonus-13-*

Andreas Helmichius Sed. Pomeranus-13-+

Daniel a Tettaw nobilis Borussus-13-=

Fridericus de Nettelhorst nobilis Borussus-13-=

Johannes Sigismundus ab Ostaw …….(*texte illisible*) Borussus-13-=

Jacobus Rumlerus Dantiscanus Borussus-13-=

Bernhard von Scheven Pomeranus-13-+

Joachim Sander Pomeranus-13-+

Caspar Hoyer Stralesunda-Pomeranus-13-+

Marcus Rzecrycky de Rzecrysa praefectus domini Johannis a Zamoscio Zamoysky-13-*

Franciscus de Czarnocin Czarnocki eques Polonus-13-*

Hyacinthus de Wocznorys Wocznorynski eques Polonus-13-*

Zbigneus de Zelonka Zelonski eques Polonus-13-*

Samuel a Boguslawice Sierakowski eques Polonus-13-*

Georgius a Trzciara Trzcinski eques Polonus-13-*

Alexander de Czarnocin Czarnocky eques Polonus-13-*

Daniel Falck Gedanensis Borussus-13-=

Hieronimus Franciscus de Zaboklik Zaboklicky eques Polonus-13-*

Gabriel Franciscus Zaiaczkowski eques Polonus-13-*

Albertus Pomislansky eques Polonus-13-*

Stanislaus Alexander Hinkiewicz Polonus-13-*

Nathanael Adami Dantiscanus-Borussus-13-=

Urbanus Berholtz Tischhusia-Prussus-13-=

Vincentius Blücher nobilis Pomeranus-13-+

Johannes Heinricus a Lestwitz nobilis Sylesius-13-#

Balthasar Fridericus a Stosch nobilis Sylesius-13-#

Henning Julius Mörder nobilis Pomeraniae-13-+

Ernst-Johan Mörder nobilis Pomeraniae-13-+

Casimirus Klokocki ex Palatinatu Plocensi eques Polonus-13-*

Joannes d’Janotti ex Prussia civitatis Thorunensis-13-=

Benedictus Glynnicki Polonus nobilis-13-*

Joannes Zelecki eques Polonus-13-*

Andreas Sobocki Polonus eques-13-*

Vladislaus Zelecki Polonus eques-13-*

Thomas Schüll Riga-Livonus-13-*

Daniel de Gekema Borussus-13-=

Joachim Ölhafius Dantisco-Borussus-13-=

Dominus Zamotzky eques Polonus-13-*

Comes Nimritzky-13-*

S…astianus de ……………… ?-13-*

Johannes de Denhoff eques Polonus-13-*

Christophorus de Denhoff eques Polonus-13-*

Stephanus comes in Czerniechow, Niemierycz, dominus in Rzyborsk, Szersznie et Jowali-13-*

Sebastianus Ernestus Wagner Glacensis Silesius-13-#

Joannes Adalbertus Freidenberger Glacensis Silesius-13-#

Samuel Gutt Zagorski nobilis Polonus-13-*

Stanislaus Lubieniecki de Lubienice eques Polonus-13-*

Ernst Johan Mörder nobilis Pomeranus-13-+

Henricus de Pauli Gedano-Borussus-13-=.

Henricus a Waaden Gedano-Borussus-13-=

Henning Julius Mörder nobilis Pomeranus-13-+

Daniel Weglerski eques Polonus-13-*

Andreas Sigismundus de Sawice Sawiecki Polonus-13-*

Stanislaus Albertus de Smoszewo eques Polonus-13-*

Adamus Petrus de Smoszewo eques Polonus-13-*

Gotthard Velling Livonus-13-*

Hermannus Meiners Riga-Livonus-13-*

Joannes Ernestus Schmieden nobilis Borussus-13-=

Henricus Hagenius Livo-Rigensis-13-*

Joannes a Lipe Lipski eques Polonus, capitaneus-13-*

Stanislaus a Lipe Lipski eques Polonus-13-*

Princeps Samowski-13-*

Merten Emrich Borussus. *Décédé le 3 mai 1648*-13-=

Zacharius Wollsen Borussus-13-=

Albertus Josephus Bariczka Polonus-13-*

Reinholdus Duszki Dantiscanus Borussus-13-=

Daniel Pfeiffius Stetinensis Pomeranus-13-+

Vladislaus Rey de Naglowice eques Polonus-13-*

Alexander comes a Dönhoff abbas Andrecviensis, palatinides Sradiensis-13-*

Rudiger Massow Pomeranus Stolpensis-13-+

Petrus de Poliezna Kochanowsky eques Polonus-13-*

Melchior Dreilingius Livonus-13-*

Bartolomeus Vedders de Danzig-13-=

Jean Christoffle Ferdinand liber baro de Proscau-13-*

George Christoffle Charle liber baro de Proscau-13-*

Hieronimus Gratus a Moskorow Moskorzowski eques Polonus-13-*

Jean Helms Livo-13-*

Henricus Kretschmer Borussus-13-=

Daniel Jascovius Polonus-13-*

Constantinus Ferber Prutenus-13-=

Johannes Ferber Borussus-13-=

Gregorius Barkmann Borussus-13-=

Joannes Neumann Silesius-13-#

Andreas Henricus Ripp nobilis Borussus-13-+

Henricus Scheineman Pomeranus-13-+

Axelius Joannes Meyerus Riga-Livonus-13-*

Christian Strahlborn Revalia-Livonus-13-*

Christofer Antloff (Detloff) fon Schverin Pomeranus-13-+

Johannes Philippi Silesius-13-#

Heinrich Matthesius Lusatus-13-#

Joachimus Wolffenschildt Livonus-13-*

-13-Pologne, Russie, Estonie, Lettonie, Lithuanie

Pologne et les pays Baltes-13*

Poméranie-13-+

Prusse-13-=

Silésie-Lusace-13-#

1651-1660

Caspar Friderich von Kempendorff Pomeranus-13-+ (chez Mas Michau)

Jacobus Wevitzer Stralsunda-Pomeranus-13-+

Christophorus ………… eques Cu… [*nom raturé* Christophorus Wigand]-13-*

Fridericus a Bock eques Silesius-13-#

M. Sebastianus Glumper Silesio-Hennenbergia-Francus-13-#

Matthias von Köch Grunblat, Livoniae-13-*

Rutger von Köch Grunblat, Livoniae-13-*

Tomasso Skepski Polonus-13-*

Georg de Witte Revalo-Livonus-13-*

Herman Wolfradt Pomeranus-13-+

Johan Rhode Borusso-Batavus-13-=

Daniel Kronberg Thoruniensis Borussus-13-=

Jordanus Hilling Riga-Livonus-13-*

Erdtmannus comes de Promnitz-13-#

Wolffgangus comes de Promnitz-13-#
[truncated: 25,730 more chars]
